# Supplementary material for: Fish Hydrolysate Supplementation Prevents Stress-Induced Dysregulation of Hippocampal Proteins Relative to Mitochondrial Metabolism and the Neuronal Network in Mice
Source: Foods. 2022 May 28;11(11):1591. doi: 10.3390/foods11111591 (PMC9180483; doi:10.3390/foods11111591)
Supplement: Supplementary file 1 [file foods-11-01591-s001.zip]

Archive with 5 entries (5 files):
- File S1-materials-and-methods.pdf
- Table_S1_quantified-proteins.xlsx
- Table_S2_stress_proteins.xlsx
- Table_S3_supplementation-proteins.xlsx
- Table_S4_interaction-proteins.xlsx
