# Supplementary material for: Fish Hydrolysate Supplementation Prevents Stress-Induced Dysregulation of Hippocampal Proteins Relative to Mitochondrial Metabolism and the Neuronal Network in Mice
Source: Foods. 2022 May 28;11(11):1591. doi: 10.3390/foods11111591 (PMC9180483; doi:10.3390/foods11111591)
Supplement: Supplementary file 1 [file foods-11-01591-s001.zip › Table_S1_quantified-proteins.xlsx]

## Sheet: Feuil1
C-NS_1	C-NS_1-1	C-NS_2	C-NS_3	C-NS_4	C-NS_4-1	C-NS_5	C-NS_5-1	C-S_19	C-S_20	C-S_21-1	C-S_22-1	C-S_23	C-S_24	C-S_24-1	C-S_25-1	FH-NS_10	FH-NS_11	FH-NS_11-1	FH-NS_12	FH-NS_13-1	FH-NS_14-1	FH-NS_7	FH-NS_9	FH-S_25	FH-S_27	FH-S_28	FH-S_29	FH-S_30	FH-S_31-1	FH-S_32-1	FH-S_34-1	Only identified by site	Reverse	Potential contaminant	ANOVA Significant	GOBP name	GOMF name	GOCC name	GOBP slim name	GOCC slim name	KEGG name	Pfam	GSEA	Keywords	Corum	GOBP	GOMF	GOCC	Student's T-test Significant C-S_C-NS
#!{Type}E	E	E	E	E	E	E	E	E	E	E	E	E	E	E	E	E	E	E	E	E	E	E	E	E	E	E	E	E	E	E	E	C	C	C	C	C	C	C	C	C	C	C	C	C	C	C	C	C	C
#!{C:Group1}C-NS	C-NS	C-NS	C-NS	C-NS	C-NS	C-NS	C-NS	C-S	C-S	C-S	C-S	C-S	C-S	C-S	C-S	FH-NS	FH-NS	FH-NS	FH-NS	FH-NS	FH-NS	FH-NS	FH-NS	FH-S	FH-S	FH-S	FH-S	FH-S	FH-S	FH-S	FH-S
#!{C:Group1_stress}NS	NS	NS	NS	NS	NS	NS	NS	S	S	S	S	S	S	S	S	NS	NS	NS	NS	NS	NS	NS	NS	S	S	S	S	S	S	S	S
#!{C:Group2_suppl}C	C	C	C	C	C	C	C	C	C	C	C	C	C	C	C	FH	FH	FH	FH	FH	FH	FH	FH	FH	FH	FH	FH	FH	FH	FH	FH
15.9649276733398	16.3934745788574	16.9300670623779	17.0988750457764	17.1654567718506	16.92995262146	16.8978214263916	16.744255065918	15.791748046875	16.8747177124023	16.2773056030273	16.6829128265381	16.6518650054932	16.0877952575684	15.4434614181519	16.5586757659912	17.3590469360352	15.2260732650757	16.7703018188477	16.726936340332	16.964319229126	16.8288555145264	15.9800052642822	17.0935211181641	16.6881141662598	16.5839786529541	16.6710720062256	17.1611328125	16.239990234375	16.7826404571533	16.6768665313721	16.4688625335693					adipose tissue development;anatomical structure development;biological regulation;biosynthetic process;cell development;cell surface receptor linked signaling pathway;cellular biosynthetic process;cellular component assembly;cellular component assembly at cellular level;cellular component organization;cellular component organization at cellular level;cellular component organization or biogenesis;…	binding;endopeptidase activator activity;endopeptidase regulator activity;enzyme activator activity;enzyme binding;enzyme regulator activity;peptidase activator activity;peptidase regulator activity;protease binding;proteasome binding;protein binding;protein complex binding	cell part;cytoplasm;intracellular membrane-bounded organelle;intracellular organelle;intracellular organelle part;intracellular part;macromolecular complex;membrane;membrane-bounded organelle;nuclear part;nucleoplasm;nucleus;organelle;organelle part;plasma membrane;proteasome complex;protein complex	anatomical structure development;biological regulation;biosynthetic process;cell development;cellular component assembly;cellular component organization;cellular macromolecular complex assembly;cellular metabolic process;cellular nitrogen compound metabolic process;cellular process;developmental process;macromolecular complex assembly;macromolecule metabolic process;metabolic process;multicellula…	cell part;cytoplasm;intracellular membrane-bounded organelle;intracellular organelle;macromolecular complex;membrane;nucleoplasm;nucleus;organelle;plasma membrane;proteasome complex;protein complex		Proteasom_Rpn13	BIOPOLYMER_METABOLIC_PROCESS;CELL_FRACTION;CELLULAR_COMPONENT_ASSEMBLY;CELLULAR_MACROMOLECULE_METABOLIC_PROCESS;CELLULAR_PROTEIN_COMPLEX_ASSEMBLY;CELLULAR_PROTEIN_METABOLIC_PROCESS;CONCANNON_APOPTOSIS_BY_EPOXOMICIN_UP;CSR_EARLY_UP.V1_UP;CTTTGT_V$LEF1_Q2;ENZYME_ACTIVATOR_ACTIVITY;ENZYME_REGULATOR_ACTIVITY;GRADE_COLON_CANCER_UP;GSE12845_IGD_NEG_BLOOD_VS_NAIVE_TONSIL_BCELL_UP;GSE14026_TH1_VS_TH17_UP…	3D-structure;Acetylation;Completeproteome;Cytoplasm;Isopeptidebond;Nucleus;Phosphoprotein;Proteasome;Referenceproteome;Ublconjugation		GO:0001541;GO:0002682;GO:0002694;GO:0003006;GO:0006139;GO:0006354;GO:0006368;GO:0006461;GO:0006807;GO:0007165;GO:0007166;GO:0007186;GO:0007276;GO:0007281;GO:0007286;GO:0007292;GO:0008152;GO:0009058;GO:0009888;GO:0009966;GO:0009967;GO:0009987;GO:0010646;GO:0010647;GO:0010950;GO:0010952;GO:0016043;GO:0016070;GO:0019222;GO:0022414;GO:0022602;GO:0022607;GO:0023051;GO:0023056;GO:0032501;GO:0032502;GO:…	GO:0002020;GO:0005488;GO:0005515;GO:0008047;GO:0016504;GO:0019899;GO:0030234;GO:0032403;GO:0061133;GO:0061134;GO:0061135;GO:0070628	GO:0000502;GO:0005634;GO:0005654;GO:0005737;GO:0005886;GO:0016020;GO:0032991;GO:0043226;GO:0043227;GO:0043229;GO:0043231;GO:0043234;GO:0044422;GO:0044424;GO:0044428;GO:0044446;GO:0044464
17.8377513885498	18.5293235778809	18.9743804931641	18.1566467285156	18.1763095855713	19.1062297821045	18.6607341766357	18.8157844543457	18.5037403106689	18.6044006347656	18.6517601013184	18.2838745117188	18.7641906738281	18.675350189209	18.5337409973145	18.4385566711426	17.9845962524414	18.8133430480957	18.542797088623	17.9536170959473	18.9304714202881	19.1449222564697	19.0478534698486	18.3569850921631	17.9169521331787	18.666467666626	18.5646190643311	17.8220233917236	18.5857105255127	18.6478652954102	18.7654228210449	19.1875171661377					biological adhesion;cell adhesion;cell-cell adhesion;cellular process;homophilic cell adhesion	binding;calcium ion binding;cation binding;ion binding;metal ion binding	cell part;integral to membrane;integral to plasma membrane;intrinsic to membrane;intrinsic to plasma membrane;membrane part;plasma membrane part	biological adhesion;cell adhesion;cellular process	cell part		Cadherin;Cadherin_2;Protocadherin	AACTTT_UNKNOWN;ACCAAAG,MIR-9;AIGNER_ZEB1_TARGETS;AMIT_EGF_RESPONSE_240_HELA;AMIT_EGF_RESPONSE_240_MCF10A;AMIT_SERUM_RESPONSE_240_MCF10A;AZARE_NEOPLASTIC_TRANSFORMATION_BY_STAT3_DN;AZARE_STAT3_TARGETS;BEGUM_TARGETS_OF_PAX3_FOXO1_FUSION_UP;BLALOCK_ALZHEIMERS_DISEASE_DN;BROWNE_HCMV_INFECTION_1HR_UP;BROWNE_HCMV_INFECTION_4HR_UP;BUYTAERT_PHOTODYNAMIC_THERAPY_STRESS_DN;CAGGTG_V$E12_Q6;CAGTATT,MIR-200B,…	Calcium;Celladhesion;Completeproteome;Membrane;Proteomicsidentification;Referenceproteome;Repeat;Transmembrane;Transmembranehelix		GO:0007155;GO:0007156;GO:0009987;GO:0016337;GO:0022610	GO:0005488;GO:0005509;GO:0043167;GO:0043169;GO:0046872	GO:0005887;GO:0016021;GO:0031224;GO:0031226;GO:0044425;GO:0044459;GO:0044464
14.3735551834106	13.2308464050293	14.2162914276123	14.7661666870117	14.4084625244141	13.0791540145874	14.2115840911865	12.6772956848145	14.915623664856	13.7514390945435	13.710578918457	13.4308443069458	13.0599889755249	14.7702808380127	14.3791751861572	14.2728891372681	14.3773851394653	13.674768447876	14.5796699523926	13.6159744262695	14.0706472396851	14.2118120193481	14.6556987762451	13.6617412567139	13.9733028411865	14.1679954528809	13.5720071792603	13.9593677520752	13.7924041748047	14.5168695449829	13.8030261993408	13.8567867279053
13.5968389511108	12.5466890335083	12.9979305267334	13.7854957580566	13.7811889648438	14.956072807312	13.116039276123	13.9431924819946	14.6761360168457	14.0971384048462	14.3771886825562	14.3482627868652	14.2484445571899	14.8057956695557	12.7077293395996	13.4523591995239	14.1403160095215	14.9686946868896	14.3204612731934	12.9415245056152	13.3336639404297	13.5843257904053	13.6965475082397	14.8656673431396	13.4843139648438	14.0679159164429	14.1179647445679	13.8149490356445	14.3938417434692	14.7346134185791	14.8527879714966	13.2392921447754					biological regulation;catabolic process;cellular catabolic process;cellular macromolecule catabolic process;cellular macromolecule metabolic process;cellular metabolic process;cellular nitrogen compound metabolic process;cellular process;establishment of localization;establishment of RNA localization;macromolecule catabolic process;macromolecule metabolic process;metabolic process;mRNA catabolic …	binding;nucleic acid binding;nucleotide binding;RNA binding	cell part;cytoplasm;intracellular organelle part;intracellular part;macromolecular complex;nuclear body;nuclear part;nuclear speck;nucleoplasm part;organelle part;ribonucleoprotein complex;spliceosomal complex	biological regulation;catabolic process;cellular metabolic process;cellular nitrogen compound metabolic process;cellular process;establishment of localization;macromolecule metabolic process;metabolic process;mRNA metabolic process;mRNA processing;nitrogen compound metabolic process;nucleobase-containing compound metabolic process;nucleobase-containing compound transport;primary metabolic process…	cell part;cytoplasm;macromolecular complex;ribonucleoprotein complex;spliceosomal complex	mRNA surveillance pathway;RNA transport;Spliceosome	RRM_1	ASTON_MAJOR_DEPRESSIVE_DISORDER_DN;BENPORATH_CYCLING_GENES;BENPORATH_PROLIFERATION;BLALOCK_ALZHEIMERS_DISEASE_INCIPIENT_UP;BLALOCK_ALZHEIMERS_DISEASE_UP;BOYAULT_LIVER_CANCER_SUBCLASS_G1_UP;BUYTAERT_PHOTODYNAMIC_THERAPY_STRESS_DN;chr1q21;CREIGHTON_ENDOCRINE_THERAPY_RESISTANCE_1;DANG_BOUND_BY_MYC;DAVICIONI_MOLECULAR_ARMS_VS_ERMS_UP;DORMOY_ELAVL1_TARGETS;EBAUER_TARGETS_OF_PAX3_FOXO1_FUSION_UP;ENK_UV…	Acetylation;Alternativesplicing;Completeproteome;Cytoplasm;mRNAprocessing;mRNAsplicing;mRNAtransport;Nonsense-mediatedmRNAdecay;Nucleus;Phosphoprotein;Referenceproteome;RNA-binding;Spliceosome;Translationregulation;Transport		GO:0000184;GO:0000381;GO:0000956;GO:0006139;GO:0006396;GO:0006397;GO:0006401;GO:0006402;GO:0006417;GO:0006807;GO:0006810;GO:0008152;GO:0008380;GO:0009056;GO:0009057;GO:0009889;GO:0009987;GO:0010468;GO:0010556;GO:0010608;GO:0015931;GO:0016070;GO:0016071;GO:0019219;GO:0019222;GO:0031323;GO:0031326;GO:0032268;GO:0034641;GO:0043170;GO:0043484;GO:0044237;GO:0044238;GO:0044248;GO:0044260;GO:0044265;GO:…	GO:0000166;GO:0003676;GO:0003723;GO:0005488	GO:0005681;GO:0005737;GO:0016604;GO:0016607;GO:0030529;GO:0032991;GO:0044422;GO:0044424;GO:0044428;GO:0044446;GO:0044451;GO:0044464
13.523232460022	12.4764766693115	12.898286819458	14.6118011474609	13.8026304244995	13.6085014343262	13.1352291107178	13.9069404602051	13.6960182189941	12.5834817886353	13.5807962417603	14.932785987854	13.9984464645386	14.1422805786133	13.9486455917358	14.4050788879395	13.5377244949341	14.1496067047119	13.4733419418335	14.2978477478027	15.0253973007202	13.9624996185303	13.6384840011597	14.3108320236206	14.6767406463623	13.138373374939	14.7118463516235	12.7021913528442	13.080096244812	13.6197557449341	13.8050947189331	13.9827556610107
13.875958442688	12.346305847168	13.8659687042236	13.2442827224731	14.4801330566406	13.9536466598511	14.0461158752441	14.3621816635132	13.4495267868042	13.3360652923584	14.1799755096436	13.6850919723511	13.6997480392456	14.0728282928467	13.0250749588013	13.467321395874	14.3842344284058	13.998592376709	13.5240869522095	14.8024291992188	14.1308059692383	13.8018360137939	14.2207307815552	14.3844299316406	14.0644664764404	13.8889245986938	14.4738731384277	13.6006336212158	13.7074661254883	14.4164590835571	14.2807893753052	13.5700702667236					anatomical structure morphogenesis;biological regulation;catabolic process;cellular catabolic process;cellular macromolecule catabolic process;cellular macromolecule metabolic process;cellular metabolic process;cellular nitrogen compound metabolic process;cellular process;developmental process;embryonic cranial skeleton morphogenesis;embryonic morphogenesis;embryonic organ morphogenesis;embryonic…	adenyl nucleotide binding;adenyl ribonucleotide binding;ATP binding;ATPase activity;ATPase activity, coupled;ATP-dependent helicase activity;ATP-dependent RNA helicase activity;binding;catalytic activity;helicase activity;hydrolase activity;hydrolase activity, acting on acid anhydrides;hydrolase activity, acting on acid anhydrides, in phosphorus-containing anhydrides;mRNA binding;nucleic acid bin…	catalytic step 2 spliceosome;cell part;cytoplasm;exon-exon junction complex;intracellular non-membrane-bounded organelle;intracellular organelle;intracellular organelle part;intracellular part;macromolecular complex;membrane;non-membrane-bounded organelle;nuclear body;nuclear part;nuclear speck;nucleolus;nucleoplasm part;organelle;organelle part;protein complex;ribonucleoprotein complex;spliceoso…	anatomical structure morphogenesis;biological regulation;catabolic process;cellular metabolic process;cellular nitrogen compound metabolic process;cellular process;developmental process;establishment of localization;macromolecule metabolic process;metabolic process;mRNA metabolic process;mRNA processing;nitrogen compound metabolic process;nucleobase-containing compound metabolic process;nucleobas…	cell part;cytoplasm;intracellular non-membrane-bounded organelle;intracellular organelle;macromolecular complex;membrane;nucleolus;organelle;protein complex;ribonucleoprotein complex;spliceosomal complex	mRNA surveillance pathway;RNA transport;Spliceosome	DEAD;Helicase_C	ACEVEDO_LIVER_CANCER_UP;ACEVEDO_LIVER_TUMOR_VS_NORMAL_ADJACENT_TISSUE_UP;ACOSTA_PROLIFERATION_INDEPENDENT_MYC_TARGETS_UP;ADENYL_NUCLEOTIDE_BINDING;ADENYL_RIBONUCLEOTIDE_BINDING;ATP_BINDING;ATP_DEPENDENT_HELICASE_ACTIVITY;ATP_DEPENDENT_RNA_HELICASE_ACTIVITY;ATPASE_ACTIVITY;ATPASE_ACTIVITY_COUPLED;BIDUS_METASTASIS_UP;BIOSYNTHETIC_PROCESS;BOYAULT_LIVER_CANCER_SUBCLASS_G3_UP;BROWNE_HCMV_INFECTION_14H…	Acetylation;ATP-binding;Completeproteome;Cytoplasm;Helicase;Hydrolase;mRNAprocessing;mRNAsplicing;mRNAtransport;Nonsense-mediatedmRNAdecay;Nucleotide-binding;Nucleus;Phosphoprotein;Referenceproteome;RNA-binding;rRNAprocessing;Spliceosome;Translationregulation;Transport		GO:0000184;GO:0000381;GO:0000956;GO:0006139;GO:0006364;GO:0006396;GO:0006397;GO:0006401;GO:0006402;GO:0006417;GO:0006807;GO:0006810;GO:0008152;GO:0008380;GO:0009056;GO:0009057;GO:0009653;GO:0009887;GO:0009889;GO:0009890;GO:0009891;GO:0009892;GO:0009893;GO:0009987;GO:0010468;GO:0010501;GO:0010556;GO:0010557;GO:0010558;GO:0010604;GO:0010605;GO:0010608;GO:0015931;GO:0016070;GO:0016071;GO:0016072;GO:…	GO:0000166;GO:0003676;GO:0003723;GO:0003724;GO:0003727;GO:0003729;GO:0003824;GO:0004004;GO:0004386;GO:0005488;GO:0005524;GO:0008026;GO:0008143;GO:0008186;GO:0016462;GO:0016787;GO:0016817;GO:0016818;GO:0016887;GO:0017076;GO:0017111;GO:0030554;GO:0032553;GO:0032555;GO:0032559;GO:0035639;GO:0042623;GO:0070035;GO:0070717	GO:0005681;GO:0005730;GO:0005737;GO:0016020;GO:0016604;GO:0016607;GO:0030529;GO:0032991;GO:0035145;GO:0043226;GO:0043228;GO:0043229;GO:0043232;GO:0043234;GO:0044422;GO:0044424;GO:0044428;GO:0044446;GO:0044451;GO:0044464;GO:0071013
14.6735038757324	13.5284519195557	16.0948619842529	16.6171226501465	14.280330657959	14.3688936233521	15.8813533782959	13.3092679977417	13.0154829025269	16.9904804229736	13.3924770355225	16.2301712036133	13.1309795379639	14.6141166687012	11.7340097427368	15.4572849273682	17.1769905090332	16.2303028106689	16.3214874267578	13.721417427063	13.4045705795288	14.515661239624	13.8819704055786	14.5168991088867	14.3377866744995	16.85817527771	14.0758867263794	13.3910255432129	13.348690032959	16.377311706543	15.8252325057983	14.092604637146
13.1073093414307	14.4931964874268	14.0865993499756	14.3191299438477	13.2619161605835	13.5188913345337	12.7516164779663	13.7253885269165	13.1393804550171	14.9057960510254	14.3201131820679	13.6845541000366	14.3972311019897	14.3543481826782	14.5897836685181	13.5065317153931	12.4834566116333	14.1227416992188	13.8026304244995	14.2596731185913	12.6205406188965	14.1980800628662	13.9871511459351	14.0593175888062	13.6168594360352	14.0105066299438	13.6622943878174	14.2066354751587	14.4354085922241	13.254056930542	14.0628938674927	14.188702583313
13.880392074585	12.0882444381714	14.4409637451172	14.2146883010864	14.3323640823364	14.3331623077393	14.227560043335	13.9656591415405	14.1068382263184	13.3644590377808	14.6744184494019	14.1315498352051	14.9470567703247	14.3787002563477	13.307879447937	13.3026027679443	13.5044231414795	14.0560989379883	14.2090740203857	14.5156354904175	13.2304306030273	13.7888116836548	13.7778673171997	14.4919881820679	13.8717164993286	13.1379480361938	14.6669006347656	13.6742258071899	13.7115383148193	13.0151844024658	13.6774282455444	14.2408962249756
18.8721046447754	19.2318687438965	19.4359760284424	18.7913150787354	18.8830375671387	18.784782409668	19.2523193359375	19.2570018768311	19.0836353302002	19.1700134277344	19.8124809265137	18.782320022583	19.3377132415771	19.6169967651367	19.2673721313477	18.8318271636963	18.8669834136963	19.2768516540527	18.1026725769043	19.0754585266113	19.2896499633789	18.8304653167725	19.1522941589355	19.5169353485107	19.3929710388184	18.7427444458008	18.8160343170166	19.0624465942383	19.4804782867432	19.3911895751953	19.6430110931396	18.9894561767578					biosynthetic process;cellular biosynthetic process;cellular macromolecule biosynthetic process;cellular macromolecule metabolic process;cellular metabolic process;cellular process;cellular protein metabolic process;macromolecule biosynthetic process;macromolecule metabolic process;metabolic process;primary metabolic process;protein metabolic process;translation	binding;nucleic acid binding;RNA binding;rRNA binding;structural constituent of ribosome;structural molecule activity	adherens junction;anchoring junction;cell junction;cell part;cell-substrate adherens junction;cell-substrate junction;cytoplasm;cytosolic large ribosomal subunit;focal adhesion;intracellular membrane-bounded organelle;intracellular non-membrane-bounded organelle;intracellular organelle;intracellular organelle part;intracellular part;large ribosomal subunit;macromolecular complex;membrane;membrane…	biosynthetic process;cellular metabolic process;cellular process;macromolecule metabolic process;metabolic process;primary metabolic process;protein metabolic process;translation	cell part;cytoplasm;intracellular membrane-bounded organelle;intracellular non-membrane-bounded organelle;intracellular organelle;macromolecular complex;membrane;nucleolus;nucleus;organelle;ribonucleoprotein complex	Ribosome	Ribosomal_L6	BENPORATH_MYC_MAX_TARGETS;BENPORATH_SOX2_TARGETS;BIOSYNTHETIC_PROCESS;CELLULAR_BIOSYNTHETIC_PROCESS;CELLULAR_MACROMOLECULE_METABOLIC_PROCESS;CELLULAR_PROTEIN_METABOLIC_PROCESS;chr4p13;CYTOPLASM;CYTOPLASMIC_PART;DANG_BOUND_BY_MYC;DANG_MYC_TARGETS_UP;EHLERS_ANEUPLOIDY_UP;GCM_ACTG1;GCM_NPM1;GCM_TPT1;GNF2_DAP3;GNF2_EIF3S6;GNF2_FBL;GNF2_ST13;GNF2_TPT1;GRADE_COLON_CANCER_UP;GSE10239_MEMORY_VS_KLRG1INT_…	Acetylation;Completeproteome;Polymorphism;Referenceproteome;Ribonucleoprotein;Ribosomalprotein;Tumorantigen		GO:0006412;GO:0008152;GO:0009058;GO:0009059;GO:0009987;GO:0019538;GO:0034645;GO:0043170;GO:0044237;GO:0044238;GO:0044249;GO:0044260;GO:0044267	GO:0003676;GO:0003723;GO:0003735;GO:0005198;GO:0005488;GO:0019843	GO:0005634;GO:0005730;GO:0005737;GO:0005912;GO:0005924;GO:0005925;GO:0015934;GO:0016020;GO:0022625;GO:0030054;GO:0030055;GO:0030529;GO:0032991;GO:0043226;GO:0043227;GO:0043228;GO:0043229;GO:0043231;GO:0043232;GO:0044422;GO:0044424;GO:0044428;GO:0044446;GO:0044464;GO:0070161
13.8772554397583	13.0572967529297	13.2089128494263	14.1856489181519	14.6332912445068	14.2570877075195	13.6097297668457	14.0584993362427	14.7446165084839	13.2718324661255	14.0699157714844	13.5680294036865	13.6952667236328	14.7076034545898	12.7315673828125	14.4441995620728	14.0660591125488	14.3864498138428	13.6198310852051	13.3786144256592	14.25403881073	13.869668006897	13.7924451828003	13.8006296157837	13.0967712402344	13.1227769851685	15.0431985855103	13.2725849151611	13.9799337387085	13.2836055755615	14.4382486343384	13.4777641296387					cellular macromolecule metabolic process;cellular metabolic process;cellular nitrogen compound metabolic process;cellular process;cellular protein metabolic process;macromolecule metabolic process;macromolecule modification;metabolic process;mRNA metabolic process;mRNA processing;nitrogen compound metabolic process;nuclear mRNA splicing, via spliceosome;nucleic acid metabolic process;nucleobase-c…	protein tag	cell part;cytoplasm;intracellular membrane-bounded organelle;intracellular organelle;intracellular part;membrane-bounded organelle;nucleus;organelle	cellular metabolic process;cellular nitrogen compound metabolic process;cellular process;macromolecule metabolic process;macromolecule modification;metabolic process;mRNA metabolic process;mRNA processing;nitrogen compound metabolic process;nucleobase-containing compound metabolic process;primary metabolic process;protein metabolic process;protein modification process;RNA metabolic process;RNA pr…	cell part;cytoplasm;intracellular membrane-bounded organelle;intracellular organelle;nucleus;organelle		ubiquitin	ALONSO_METASTASIS_UP;BLALOCK_ALZHEIMERS_DISEASE_DN;chr19p13;CYTOPLASM;FEVR_CTNNB1_TARGETS_UP;GGAANCGGAANY_UNKNOWN;GOLDRATH_HOMEOSTATIC_PROLIFERATION;GSE13485_DAY1_VS_DAY21_YF17D_VACCINE_PBMC_DN;GSE14308_TH2_VS_NAIVE_CD4_TCELL_UP;GSE14308_TH2_VS_NATURAL_TREG_UP;GSE1448_CTRL_VS_ANTI_VBETA5_DP_THYMOCYTE_UP;GSE15324_ELF4_KO_VS_WT_ACTIVATED_CD8_TCELL_DN;GSE15324_ELF4_KO_VS_WT_NAIVE_CD8_TCELL_DN;GSE153…	3D-structure;Completeproteome;Cytoplasm;Referenceproteome;Ublconjugationpathway		GO:0000375;GO:0000377;GO:0000398;GO:0006139;GO:0006396;GO:0006397;GO:0006464;GO:0006807;GO:0008152;GO:0008380;GO:0009987;GO:0016070;GO:0016071;GO:0019538;GO:0034641;GO:0043170;GO:0043412;GO:0044237;GO:0044238;GO:0044260;GO:0044267;GO:0090304	GO:0031386	GO:0005634;GO:0005737;GO:0043226;GO:0043227;GO:0043229;GO:0043231;GO:0044424;GO:0044464
14.2401313781738	15.6657247543335	17.1092185974121	18.5279884338379	16.3053321838379	17.5420799255371	18.5583534240723	18.0460147857666	16.636510848999	17.7153854370117	14.8269271850586	16.5488529205322	14.0899524688721	13.6583051681519	18.119234085083	16.6434326171875	16.9181175231934	16.4301414489746	16.7637042999268	15.6607484817505	18.7117938995361	17.4840831756592	13.8205394744873	13.0711660385132	16.4343509674072	17.2427463531494	14.4275341033936	17.7826404571533	18.5929164886475	16.2018375396729	16.2040176391602	17.2080059051514					biosynthetic process;cellular biosynthetic process;cellular component biogenesis;cellular component biogenesis at cellular level;cellular component organization or biogenesis;cellular component organization or biogenesis at cellular level;cellular macromolecule biosynthetic process;cellular macromolecule metabolic process;cellular metabolic process;cellular process;cellular protein metabolic proc…	binding;nucleic acid binding;RNA binding;rRNA binding;structural constituent of ribosome;structural molecule activity	adherens junction;anchoring junction;cell junction;cell part;cell-substrate adherens junction;cell-substrate junction;cytoplasm;cytoplasmic part;cytosol;cytosolic small ribosomal subunit;extracellular membrane-bounded organelle;extracellular organelle;extracellular region part;extracellular vesicular exosome;focal adhesion;intracellular membrane-bounded organelle;intracellular organelle;intracell…	biosynthetic process;cellular metabolic process;cellular process;macromolecule metabolic process;metabolic process;primary metabolic process;protein metabolic process;ribosome biogenesis;translation	cell part;cytoplasm;cytosol;extracellular organelle;intracellular membrane-bounded organelle;intracellular organelle;macromolecular complex;membrane;nucleus;organelle;ribonucleoprotein complex;small ribosomal subunit;vesicle	Ribosome	Ribosomal_S13	BENPORATH_NANOG_TARGETS;BENPORATH_NOS_TARGETS;BENPORATH_OCT4_TARGETS;BENPORATH_SOX2_TARGETS;BILANGES_SERUM_SENSITIVE_GENES;chr6p21;FIGUEROA_AML_METHYLATION_CLUSTER_1_DN;GCANCTGNY_V$MYOD_Q6;GCM_NPM1;GCM_TPT1;GNF2_EIF3S6;GNF2_TPT1;GOLDRATH_EFF_VS_MEMORY_CD8_TCELL_DN;GRAESSMANN_APOPTOSIS_BY_SERUM_DEPRIVATION_UP;GSE10239_NAIVE_VS_DAY4.5_EFF_CD8_TCELL_UP;GSE12845_IGD_POS_BLOOD_VS_PRE_GC_TONSIL_BCELL_U…	Acetylation;Completeproteome;Cytoplasm;Referenceproteome;Ribonucleoprotein;Ribosomalprotein;RNA-binding;rRNA-binding		GO:0006412;GO:0008152;GO:0009058;GO:0009059;GO:0009987;GO:0019538;GO:0022613;GO:0034645;GO:0042254;GO:0043170;GO:0044085;GO:0044237;GO:0044238;GO:0044249;GO:0044260;GO:0044267;GO:0071840;GO:0071841;GO:0071843	GO:0003676;GO:0003723;GO:0003735;GO:0005198;GO:0005488;GO:0019843	GO:0005634;GO:0005737;GO:0005829;GO:0005912;GO:0005924;GO:0005925;GO:0015935;GO:0016020;GO:0022627;GO:0030054;GO:0030055;GO:0030529;GO:0031982;GO:0031988;GO:0032991;GO:0043226;GO:0043227;GO:0043229;GO:0043230;GO:0043231;GO:0044421;GO:0044422;GO:0044424;GO:0044444;GO:0044446;GO:0044464;GO:0065010;GO:0070062;GO:0070161
13.7287530899048	13.7646017074585	13.8185958862305	12.3537998199463	14.5740613937378	15.1025819778442	14.6886711120605	14.4914770126343	13.9115266799927	14.7061357498169	13.5584745407104	13.6520004272461	14.0603799819946	14.8968162536621	14.9433393478394	14.5154867172241	15.0636053085327	13.4396200180054	13.9152956008911	15.2455911636353	13.3018913269043	13.8365030288696	14.0631561279297	14.0237607955933	14.2618360519409	14.1287708282471	14.2909049987793	12.666955947876	14.2923965454102	14.3453521728516	13.4386606216431	14.1927709579468							cell part;intracellular membrane-bounded organelle;intracellular organelle;intracellular part;membrane-bounded organelle;nucleus;organelle		cell part;intracellular membrane-bounded organelle;intracellular organelle;nucleus;organelle		Cullin_binding	AAGCACA,MIR-218;AGCACTT,MIR-93,MIR-302A,MIR-302B,MIR-302C,MIR-302D,MIR-372,MIR-373,MIR-520E,MIR-520A,MIR-526B,MIR-520B,MIR-520C,MIR-520D;ATGTACA,MIR-493;ATGTAGC,MIR-221,MIR-222;CACTGTG,MIR-128A,MIR-128B;CAGTATT,MIR-200B,MIR-200C,MIR-429;chr3q26;DIAZ_CHRONIC_MEYLOGENOUS_LEUKEMIA_UP;DODD_NASOPHARYNGEAL_CARCINOMA_DN;FULCHER_INFLAMMATORY_RESPONSE_LECTIN_VS_LPS_UP;GCM_MAX;GNF2_CDC27;GSE13485_CTRL_VS_D…	Acetylation;Completeproteome;Nucleus;Proto-oncogene;Referenceproteome;Ublconjugationpathway				GO:0005634;GO:0043226;GO:0043227;GO:0043229;GO:0043231;GO:0044424;GO:0044464
13.1802129745483	13.9139528274536	13.7642269134521	14.2675075531006	13.2887344360352	13.7912359237671	13.4717655181885	13.3215761184692	13.8873558044434	14.0072898864746	13.4665613174438	13.1873054504395	13.7056198120117	14.3224401473999	14.2152299880981	12.9735488891602	14.5137271881104	15.1657772064209	12.8099746704102	14.1808633804321	13.4375228881836	14.1375284194946	14.3370313644409	15.0366430282593	14.2895956039429	14.0920963287354	14.3870849609375	14.0367221832275	13.8011875152588	13.6543245315552	14.792013168335	14.4254131317139
16.4780578613281	16.9261341094971	16.3155918121338	16.8196544647217	16.8268718719482	15.9048700332642	16.4463729858398	16.7115592956543	16.4854202270508	16.2577381134033	17.0433483123779	16.8462257385254	17.053882598877	16.8832168579102	16.5827159881592	16.6477947235107	16.2496128082275	16.7631855010986	16.8941555023193	16.8750782012939	16.7564258575439	16.7750701904297	17.0952739715576	17.221851348877	16.663724899292	16.1267051696777	17.0834789276123	16.3629875183105	15.6932964324951	17.3500938415527	16.9517402648926	16.8638725280762
18.7300586700439	17.8724937438965	17.5192985534668	18.1755790710449	14.8333349227905	16.5130023956299	17.0485725402832	17.8775959014893	17.7883224487305	14.8226699829102	17.8889923095703	18.0811920166016	14.3897228240967	17.5494689941406	17.9641494750977	16.2851314544678	16.8981761932373	14.2071495056152	13.8725318908691	17.8490390777588	18.3997039794922	14.0212097167969	18.4862842559814	18.291898727417	13.4093837738037	16.5117835998535	18.2142810821533	18.8228321075439	17.4387588500977	16.8186569213867	17.8076324462891	16.4898796081543					biosynthetic process;cellular biosynthetic process;cellular macromolecule biosynthetic process;cellular macromolecule metabolic process;cellular metabolic process;cellular process;cellular protein metabolic process;macromolecule biosynthetic process;macromolecule metabolic process;metabolic process;primary metabolic process;protein metabolic process;translation	structural constituent of ribosome;structural molecule activity	cell part;cytoplasmic part;intracellular non-membrane-bounded organelle;intracellular organelle;intracellular part;macromolecular complex;non-membrane-bounded organelle;organelle;ribonucleoprotein complex;ribosome	biosynthetic process;cellular metabolic process;cellular process;macromolecule metabolic process;metabolic process;primary metabolic process;protein metabolic process;translation	cell part;intracellular non-membrane-bounded organelle;intracellular organelle;macromolecular complex;organelle;ribonucleoprotein complex;ribosome	Ribosome	Ribosomal_L44	BENPORATH_MYC_TARGETS_WITH_EBOX;BENPORATH_SOX2_TARGETS;BHATI_G2M_ARREST_BY_2METHOXYESTRADIOL_DN;BILANGES_SERUM_AND_RAPAMYCIN_SENSITIVE_GENES;CHICAS_RB1_TARGETS_LOW_SERUM;chrxq22;DAZARD_RESPONSE_TO_UV_NHEK_UP;DAZARD_UV_RESPONSE_CLUSTER_G1;GCM_NPM1;GCM_TPT1;GNF2_EIF3S6;GNF2_ST13;GRADE_COLON_CANCER_UP;GREGORY_SYNTHETIC_LETHAL_WITH_IMATINIB;GSE10239_MEMORY_VS_KLRG1HIGH_EFF_CD8_TCELL_UP;GSE10239_MEMOR…	Completeproteome;Cytoplasm;Referenceproteome;Ribonucleoprotein;Ribosomalprotein		GO:0006412;GO:0008152;GO:0009058;GO:0009059;GO:0009987;GO:0019538;GO:0034645;GO:0043170;GO:0044237;GO:0044238;GO:0044249;GO:0044260;GO:0044267	GO:0003735;GO:0005198	GO:0005840;GO:0030529;GO:0032991;GO:0043226;GO:0043228;GO:0043229;GO:0043232;GO:0044424;GO:0044444;GO:0044464
13.6971616744995	13.8557033538818	13.9689950942993	13.8863248825073	12.7990016937256	15.0088968276978	12.8214731216431	14.228214263916	13.9833631515503	12.4078311920166	14.1514701843262	14.4694690704346	13.4586734771729	14.8743391036987	14.3115892410278	13.1479864120483	12.6947813034058	13.1559057235718	13.4825925827026	15.0768127441406	13.9659414291382	14.8665647506714	13.9031410217285	14.9194688796997	13.5277452468872	12.9278860092163	14.2915534973145	13.0193338394165	15.4926490783691	13.7284479141235	13.9078130722046	14.4441680908203					biological regulation;biosynthetic process;cellular biosynthetic process;cellular component assembly;cellular component organization;cellular component organization or biogenesis;cellular macromolecule biosynthetic process;cellular macromolecule metabolic process;cellular metabolic process;cellular nitrogen compound metabolic process;cellular process;cellular response to chemical stimulus;cellula…	binding;chromatin binding;core promoter binding;DNA binding;mRNA binding;nucleic acid binding;nucleotide binding;regulatory region DNA binding;regulatory region nucleic acid binding;RNA binding;transcription regulatory region DNA binding	catalytic step 2 spliceosome;cell part;chromatin;chromosomal part;euchromatin;extracellular membrane-bounded organelle;extracellular organelle;extracellular region part;extracellular vesicular exosome;intracellular membrane-bounded organelle;intracellular organelle;intracellular organelle part;intracellular part;macromolecular complex;membrane-bounded organelle;membrane-bounded vesicle;nuclear ch…	biological regulation;biosynthetic process;cellular component assembly;cellular component organization;cellular metabolic process;cellular nitrogen compound metabolic process;cellular process;macromolecular complex assembly;macromolecule metabolic process;metabolic process;mRNA metabolic process;mRNA processing;nitrogen compound metabolic process;nucleobase-containing compound metabolic process;p…	cell part;extracellular organelle;intracellular membrane-bounded organelle;intracellular organelle;macromolecular complex;nucleus;organelle;ribonucleoprotein complex;spliceosomal complex;vesicle	Spliceosome	RBM1CTR;RRM_1	AAGCAAT,MIR-137;ACCATTT,MIR-522;ACTGAAA,MIR-30A-3P,MIR-30E-3P;BASAKI_YBX1_TARGETS_DN;BERENJENO_TRANSFORMED_BY_RHOA_UP;chr11p15;chr1p22;CTIP_DN.V1_DN;FEVR_CTNNB1_TARGETS_DN;GNF2_CCNA1;GNF2_MLF1;GSE14026_TH1_VS_TH17_UP;GSE14308_TH1_VS_NATURAL_TREG_UP;GSE14308_TH17_VS_INDUCED_TREG_DN;GSE1460_CORD_VS_ADULT_BLOOD_NAIVE_CD4_TCELL_DN;GSE15930_NAIVE_VS_48H_IN_VITRO_STIM_CD8_TCELL_DN;GSE15930_NAIVE_VS_48H…	Completeproteome;mRNAprocessing;mRNAsplicing;Nucleus;Phosphoprotein;Proteomicsidentification;Referenceproteome;Ribonucleoprotein;RNA-binding		GO:0000381;GO:0006139;GO:0006351;GO:0006355;GO:0006357;GO:0006366;GO:0006396;GO:0006397;GO:0006461;GO:0006508;GO:0006509;GO:0006807;GO:0008152;GO:0008380;GO:0009058;GO:0009059;GO:0009889;GO:0009891;GO:0009892;GO:0009893;GO:0009987;GO:0010033;GO:0010468;GO:0010556;GO:0010557;GO:0010604;GO:0010605;GO:0010628;GO:0016043;GO:0016070;GO:0016071;GO:0019219;GO:0019222;GO:0019538;GO:0022607;GO:0031323;GO:…	GO:0000166;GO:0000975;GO:0001047;GO:0001067;GO:0003676;GO:0003677;GO:0003682;GO:0003723;GO:0003729;GO:0005488;GO:0044212	GO:0000785;GO:0000790;GO:0000791;GO:0005634;GO:0005681;GO:0005719;GO:0030529;GO:0031982;GO:0031988;GO:0032991;GO:0043226;GO:0043227;GO:0043229;GO:0043230;GO:0043231;GO:0044421;GO:0044422;GO:0044424;GO:0044427;GO:0044428;GO:0044446;GO:0044454;GO:0044464;GO:0065010;GO:0070062;GO:0071013
15.9033641815186	16.2614154815674	13.2300281524658	14.6400365829468	13.892653465271	14.213939666748	12.9718265533447	15.3631420135498	17.0210666656494	15.1971006393433	16.3816604614258	16.1984634399414	16.7793083190918	16.0445003509521	13.7588348388672	14.4968538284302	14.2823648452759	14.7990789413452	13.6360034942627	17.2727565765381	14.5862531661987	14.4350919723511	13.602370262146	16.3334865570068	13.8389081954956	14.2378606796265	17.4838466644287	16.1985988616943	17.0392837524414	13.6181812286377	16.0815658569336	16.7222747802734
13.6328573226929	13.2296504974365	13.7898855209351	14.464560508728	14.2893857955933	13.5630445480347	13.9764070510864	13.2454776763916	13.7516946792603	14.4160041809082	13.0182981491089	14.0487756729126	12.7099018096924	15.2182540893555	13.8051385879517	14.4430780410767	13.488169670105	13.6868696212769	14.7617998123169	14.912576675415	12.8161096572876	14.7622308731079	14.0966014862061	13.5304489135742	13.0098333358765	13.6737594604492	14.9077444076538	13.7213373184204	13.7710676193237	13.2962732315063	14.166802406311	13.7402029037476
14.3667669296265	13.8692750930786	13.0288991928101	13.7608032226563	14.6491203308105	14.1248502731323	13.3406744003296	13.2821483612061	14.7098808288574	12.2993078231812	14.3198413848877	13.4626274108887	14.7781858444214	14.6127109527588	14.2872314453125	12.6817245483398	12.923246383667	13.2579078674316	13.267783164978	15.0555000305176	13.1265325546265	13.6846723556519	15.1990633010864	14.0321826934814	13.7455615997314	13.3392820358276	14.4973287582397	12.7135133743286	14.338433265686	13.9411897659302	14.4085102081299	14.5007743835449
13.4266023635864	13.948748588562	13.1984844207764	15.3780536651611	14.4925403594971	13.0251207351685	13.8863162994385	12.5184717178345	13.8415412902832	13.6820154190063	14.1745538711548	13.1414213180542	13.0613412857056	14.9127016067505	14.0636863708496	14.2993516921997	13.8815803527832	14.1916542053223	14.1478929519653	14.3357181549072	14.3253927230835	13.0843143463135	14.8545246124268	14.525707244873	14.2638883590698	14.2164840698242	13.7239217758179	13.8978624343872	13.0467958450317	13.4826707839966	13.662446975708	14.3487920761108
14.442045211792	13.8062429428101	13.7706842422485	12.7261171340942	14.9968185424805	15.5011281967163	13.6697111129761	13.2523355484009	14.2233247756958	12.8646574020386	14.2808465957642	14.316650390625	14.0541095733643	14.51416015625	13.7741889953613	13.5416507720947	13.1857452392578	14.0111436843872	13.2676162719727	13.7837514877319	13.522665977478	13.9221286773682	13.7421855926514	14.5377311706543	13.4594841003418	12.7913608551025	14.3036184310913	14.8602342605591	13.8734302520752	14.5961771011353	13.7602252960205	13.4393587112427
14.0422420501709	13.9136371612549	12.9699258804321	14.1529979705811	13.589768409729	14.2234735488892	14.4019460678101	13.4283180236816	14.463282585144	13.6776094436646	14.1530771255493	13.4626340866089	14.2324962615967	13.6716680526733	12.6098604202271	13.6059427261353	13.3743000030518	13.318452835083	13.096435546875	14.9007425308228	15.1103610992432	14.2124481201172	14.0389881134033	13.88254737854	13.8464698791504	12.58678150177	14.1960735321045	13.5245418548584	14.6428298950195	14.3682107925415	14.0627202987671	13.7994842529297
14.7628192901611	14.1353025436401	14.3464708328247	14.412036895752	12.1489372253418	14.2321767807007	13.1668891906738	14.0609273910522	14.401346206665	13.1378402709961	13.6420812606812	13.9724502563477	14.2478084564209	13.840841293335	13.1219100952148	14.4530982971191	14.1228427886963	14.6110858917236	13.7250070571899	13.0734767913818	13.6583566665649	12.8466911315918	13.8112058639526	14.1904458999634	14.5956373214722	13.4229955673218	15.3078241348267	14.1395864486694	13.8125877380371	13.8665342330933	14.222620010376	14.2307472229004
13.728123664856	14.2771873474121	13.2198257446289	13.3498468399048	15.2703619003296	14.6819181442261	13.7861108779907	14.0295705795288	13.607123374939	13.1507139205933	13.7524528503418	13.9152345657349	15.4653377532959	14.5389976501465	13.9271850585938	14.1896934509277	13.7416353225708	14.2305097579956	13.50159740448	14.4395446777344	14.6819934844971	13.7524328231812	14.5780086517334	13.8594121932983	12.9304962158203	13.7348985671997	13.9351377487183	13.830924987793	13.8311891555786	14.0996541976929	15.598292350769	14.2545051574707					autophagy;biological regulation;catabolic process;cellular catabolic process;cellular metabolic process;cellular process;metabolic process;positive regulation of catalytic activity;positive regulation of GTPase activity;positive regulation of hydrolase activity;positive regulation of molecular function;regulation of biological process;regulation of catabolic process;regulation of catalytic activi…	enzyme activator activity;enzyme regulator activity;GTPase activator activity;GTPase regulator activity;nucleoside-triphosphatase regulator activity	autophagic vacuole;cell part;cytoplasmic part;cytoplasmic vesicle;intracellular membrane-bounded organelle;intracellular organelle;intracellular part;membrane-bounded organelle;organelle;vacuole;vesicle	autophagy;biological regulation;catabolic process;cellular metabolic process;cellular process;metabolic process	cell part;intracellular membrane-bounded organelle;intracellular organelle;organelle;vacuole;vesicle		RabGAP-TBC	ATCATGA,MIR-433;CAAGGAT,MIR-362;CACTGCC,MIR-34A,MIR-34C,MIR-449;CCTGCTG,MIR-214;chrxp11;CTCAGGG,MIR-125B,MIR-125A;CTGTTAC,MIR-194;GGCACAT,MIR-455;GSE10463_CD40L_AND_VA347_VS_CD40L_IN_DC_UP;GSE26495_PD1HIGH_VS_PD1LOW_CD8_TCELL_DN;GSE2706_R848_VS_R848_AND_LPS_2H_STIM_DC_UP;GSE29617_CTRL_VS_DAY3_TIV_FLU_VACCINE_PBMC_2008_UP;GSE31082_DP_VS_CD4_SP_THYMOCYTE_UP;GSE32423_IL7_VS_IL7_IL4_NAIVE_CD8_TCELL_U…	Autophagy;Completeproteome;Cytoplasm;Cytoplasmicvesicle;GTPaseactivation;Phosphoprotein;Referenceproteome		GO:0006140;GO:0006914;GO:0008152;GO:0009056;GO:0009894;GO:0009987;GO:0019219;GO:0019222;GO:0030811;GO:0031323;GO:0031329;GO:0033121;GO:0033124;GO:0043085;GO:0043087;GO:0043547;GO:0044093;GO:0044237;GO:0044248;GO:0050789;GO:0050790;GO:0050794;GO:0051171;GO:0051336;GO:0051345;GO:0065007;GO:0065009;GO:0080090	GO:0005096;GO:0008047;GO:0030234;GO:0030695;GO:0060589	GO:0005773;GO:0005776;GO:0031410;GO:0031982;GO:0043226;GO:0043227;GO:0043229;GO:0043231;GO:0044424;GO:0044444;GO:0044464
12.9746704101563	14.8875064849854	16.4851531982422	16.8425464630127	16.2575912475586	15.8222227096558	16.455150604248	16.1755504608154	15.1510562896729	16.5670051574707	16.6295566558838	15.7510471343994	14.2553234100342	14.5907125473022	15.7782316207886	15.9127254486084	15.8016834259033	16.3054389953613	16.6155433654785	14.1082468032837	16.0975799560547	14.607666015625	16.5297355651855	14.2959127426147	12.4226579666138	16.9066562652588	14.9241790771484	15.768443107605	14.56285572052	16.936637878418	16.5793151855469	14.2316017150879					biological regulation;cell cycle;cellular component organization;cellular component organization at cellular level;cellular component organization or biogenesis;cellular component organization or biogenesis at cellular level;cellular macromolecule metabolic process;cellular metabolic process;cellular nitrogen compound metabolic process;cellular process;cellular protein metabolic process;cellular …	binding;damaged DNA binding;DNA binding;nucleic acid binding	cell part;CUL4 RING ubiquitin ligase complex;Cul4B-RING ubiquitin ligase complex;cullin-RING ubiquitin ligase complex;cytoplasm;extracellular membrane-bounded organelle;extracellular organelle;extracellular region part;extracellular vesicular exosome;intracellular organelle part;intracellular part;macromolecular complex;membrane;membrane-bounded organelle;membrane-bounded vesicle;nuclear part;nuc…	biological regulation;cell cycle;cellular component organization;cellular metabolic process;cellular nitrogen compound metabolic process;cellular process;chromatin modification;chromatin organization;chromosome organization;DNA metabolic process;DNA repair;histone modification;macromolecule metabolic process;macromolecule modification;metabolic process;nitrogen compound metabolic process;nucleoba…	cell part;cytoplasm;extracellular organelle;macromolecular complex;membrane;nucleoplasm;organelle;plasma membrane;protein complex;ubiquitin ligase complex;vesicle	Nucleotide excision repair;Ubiquitin mediated proteolysis	Cullin;Cullin_Nedd8	BASAKI_YBX1_TARGETS_DN;CHARAFE_BREAST_CANCER_LUMINAL_VS_MESENCHYMAL_DN;CHEOK_RESPONSE_TO_MERCAPTOPURINE_DN;chrxq23;chrxq24;DIAZ_CHRONIC_MEYLOGENOUS_LEUKEMIA_UP;FLECHNER_PBL_KIDNEY_TRANSPLANT_OK_VS_DONOR_UP;FORTSCHEGGER_PHF8_TARGETS_DN;GRAESSMANN_APOPTOSIS_BY_DOXORUBICIN_DN;GSE10239_MEMORY_VS_KLRG1HIGH_EFF_CD8_TCELL_DN;GSE13306_RA_VS_UNTREATED_TREG_UP;GSE13484_3H_UNSTIM_VS_YF17D_VACCINE_STIM_PBMC_…	Alternativesplicing;Cellcycle;Completeproteome;DNAdamage;DNArepair;Isopeptidebond;Nucleus;Phosphoprotein;Referenceproteome;Ublconjugation;Ublconjugationpathway		GO:0006139;GO:0006259;GO:0006281;GO:0006325;GO:0006464;GO:0006513;GO:0006807;GO:0006950;GO:0006974;GO:0006996;GO:0007049;GO:0008152;GO:0009893;GO:0009894;GO:0009896;GO:0009987;GO:0010390;GO:0010604;GO:0016043;GO:0016567;GO:0016568;GO:0016569;GO:0016570;GO:0016574;GO:0019222;GO:0019538;GO:0032446;GO:0033522;GO:0033554;GO:0034641;GO:0035518;GO:0042176;GO:0042787;GO:0043170;GO:0043412;GO:0044237;GO:…	GO:0003676;GO:0003677;GO:0003684;GO:0005488	GO:0000151;GO:0005654;GO:0005737;GO:0005886;GO:0016020;GO:0031461;GO:0031465;GO:0031982;GO:0031988;GO:0032991;GO:0043226;GO:0043227;GO:0043230;GO:0043234;GO:0044421;GO:0044422;GO:0044424;GO:0044428;GO:0044446;GO:0044464;GO:0065010;GO:0070062;GO:0080008
13.5729684829712	14.0905675888062	13.3347682952881	13.7578659057617	13.790846824646	14.2510070800781	15.1232290267944	14.0025844573975	13.8008270263672	13.9380826950073	13.1298408508301	13.6551666259766	13.8151369094849	13.8230390548706	14.8263702392578	14.1285028457642	14.1756572723389	14.3689222335815	14.2832860946655	14.7545585632324	13.6908054351807	14.5275926589966	15.2593803405762	12.8072462081909	13.6832189559937	13.241795539856	13.8054323196411	12.9950923919678	13.5672073364258	14.3197259902954	13.0722198486328	14.0865345001221						binding;cation binding;ion binding;metal ion binding;transition metal ion binding;zinc ion binding					Bromodomain;DUF3544;PHD;PWWP;zf-MYND	AAAYWAACM_V$HFH4_01;AMUNDSON_RESPONSE_TO_ARSENITE;BHAT_ESR1_TARGETS_VIA_AKT1_DN;BROWNE_HCMV_INFECTION_12HR_DN;BRUINS_UVC_RESPONSE_EARLY_LATE;BYSTRYKH_HEMATOPOIESIS_STEM_CELL_QTL_TRANS;CAGCTG_V$AP4_Q5;CATTGTYY_V$SOX9_B1;CCCNNNNNNAAGWT_UNKNOWN;CHANDRAN_METASTASIS_UP;chr20q13;CREIGHTON_ENDOCRINE_THERAPY_RESISTANCE_3;CTGCAGY_UNKNOWN;DACOSTA_UV_RESPONSE_VIA_ERCC3_COMMON_DN;DACOSTA_UV_RESPONSE_VIA_ERCC…	Completeproteome;Metal-binding;Proteomicsidentification;Referenceproteome;Zinc;Zinc-finger			GO:0005488;GO:0008270;GO:0043167;GO:0043169;GO:0046872;GO:0046914
13.7319717407227	12.4493389129639	13.4368162155151	13.6602420806885	14.660834312439	13.855260848999	13.6284923553467	13.6228656768799	13.9513034820557	14.5005035400391	13.3922910690308	13.734899520874	14.7038526535034	13.9792432785034	13.8365364074707	13.3488960266113	13.2902755737305	14.3426876068115	12.9374122619629	14.2851009368896	14.0270538330078	14.9814691543579	13.9903144836426	13.2306804656982	13.7414274215698	13.4664945602417	14.4874649047852	13.1547174453735	13.6023197174072	13.6671895980835	14.1342945098877	13.5864639282227					cellular macromolecule metabolic process;cellular metabolic process;cellular nitrogen compound metabolic process;cellular process;macromolecule metabolic process;metabolic process;mRNA metabolic process;mRNA processing;nitrogen compound metabolic process;nuclear mRNA splicing, via spliceosome;nucleic acid metabolic process;nucleobase-containing compound metabolic process;primary metabolic process…	adenyl nucleotide binding;adenyl ribonucleotide binding;ATP binding;ATPase activity;ATPase activity, coupled;ATP-dependent helicase activity;ATP-dependent RNA helicase activity;binding;catalytic activity;helicase activity;hydrolase activity;hydrolase activity, acting on acid anhydrides;hydrolase activity, acting on acid anhydrides, in phosphorus-containing anhydrides;identical protein binding;nuc…	catalytic step 2 spliceosome;cell part;cytoplasm;intracellular organelle part;intracellular part;macromolecular complex;nuclear part;nucleoplasm;organelle part;ribonucleoprotein complex;spliceosomal complex	cellular metabolic process;cellular nitrogen compound metabolic process;cellular process;macromolecule metabolic process;metabolic process;mRNA metabolic process;mRNA processing;nitrogen compound metabolic process;nucleobase-containing compound metabolic process;primary metabolic process;RNA metabolic process;RNA processing;RNA splicing	cell part;cytoplasm;macromolecular complex;nucleoplasm;ribonucleoprotein complex;spliceosomal complex	Spliceosome	DEAD;HA2;Helicase_C;OB_NTP_bind;S1	ATP_DEPENDENT_HELICASE_ACTIVITY;ATP_DEPENDENT_RNA_HELICASE_ACTIVITY;ATPASE_ACTIVITY;ATPASE_ACTIVITY_COUPLED;BENPORATH_CYCLING_GENES;BIOPOLYMER_METABOLIC_PROCESS;BOCHKIS_FOXA2_TARGETS;BROWNE_HCMV_INFECTION_16HR_UP;chr17q21;DORSAM_HOXA9_TARGETS_UP;ENK_UV_RESPONSE_EPIDERMIS_DN;GRADE_COLON_AND_RECTAL_CANCER_UP;GRUETZMANN_PANCREATIC_CANCER_UP;GSE10325_MYELOID_VS_LUPUS_MYELOID_DN;GSE14350_TREG_VS_TEFF_…	ATP-binding;Completeproteome;Helicase;Hydrolase;mRNAprocessing;mRNAsplicing;Nucleotide-binding;Nucleus;Phosphoprotein;Referenceproteome;Spliceosome		GO:0000375;GO:0000377;GO:0000398;GO:0006139;GO:0006396;GO:0006397;GO:0006807;GO:0008152;GO:0008380;GO:0009987;GO:0016070;GO:0016071;GO:0034641;GO:0043170;GO:0044237;GO:0044238;GO:0044260;GO:0090304	GO:0000166;GO:0003724;GO:0003824;GO:0004004;GO:0004386;GO:0005488;GO:0005515;GO:0005524;GO:0008026;GO:0008186;GO:0016462;GO:0016787;GO:0016817;GO:0016818;GO:0016887;GO:0017076;GO:0017111;GO:0030554;GO:0032553;GO:0032555;GO:0032559;GO:0035639;GO:0042623;GO:0042802;GO:0070035	GO:0005654;GO:0005681;GO:0005737;GO:0030529;GO:0032991;GO:0044422;GO:0044424;GO:0044428;GO:0044446;GO:0044464;GO:0071013
14.9009208679199	15.0789947509766	13.8084354400635	14.8427839279175	14.0189170837402	13.4861183166504	13.2626972198486	12.9456558227539	14.4801559448242	13.7496223449707	14.1431875228882	13.8232593536377	14.389627456665	13.9499502182007	14.4337949752808	13.91539478302	14.0245332717896	14.9567375183105	13.0943460464478	15.0779504776001	13.9675903320313	14.1005086898804	13.7893362045288	14.2243824005127	14.943078994751	13.423731803894	14.9631958007813	13.161057472229	14.1179800033569	13.597843170166	14.0533380508423	13.9800758361816					cell maturation;cellular developmental process;cellular macromolecule metabolic process;cellular metabolic process;cellular nitrogen compound metabolic process;cellular process;cellular process involved in reproduction;developmental maturation;developmental process;developmental process involved in reproduction;macromolecule metabolic process;metabolic process;mRNA 3'-end processing;mRNA metaboli…	binding;nucleic acid binding;nucleotide binding;RNA binding	cell part;cytoplasm;extracellular membrane-bounded organelle;extracellular organelle;extracellular region part;extracellular vesicular exosome;intracellular part;membrane-bounded organelle;membrane-bounded vesicle;organelle;vesicle	cell maturation;cellular metabolic process;cellular nitrogen compound metabolic process;cellular process;developmental maturation;developmental process;macromolecule metabolic process;metabolic process;mRNA metabolic process;mRNA processing;nitrogen compound metabolic process;nucleobase-containing compound metabolic process;primary metabolic process;RNA metabolic process;RNA processing	cell part;cytoplasm;extracellular organelle;organelle;vesicle	mRNA surveillance pathway;RNA degradation;RNA transport	PABP;RRM_1	CREIGHTON_ENDOCRINE_THERAPY_RESISTANCE_1;GSE13493_DP_VS_CD4INTCD8POS_THYMOCYTE_UP;GSE14308_TH17_VS_NATURAL_TREG_DN;GSE14308_TH2_VS_NATURAL_TREG_DN;GSE15767_MED_VS_SCS_MAC_LN_DN;GSE27786_LIN_NEG_VS_NEUTROPHIL_DN;GSE27786_LSK_VS_NEUTROPHIL_DN;GSE29617_CTRL_VS_DAY7_TIV_FLU_VACCINE_PBMC_2008_DN;GSE29617_DAY3_VS_DAY7_TIV_FLU_VACCINE_PBMC_2008_DN;KUNINGER_IGF1_VS_PDGFB_TARGETS_UP;MASSARWEH_TAMOXIFEN_RE…	Completeproteome;Cytoplasm;Referenceproteome;Repeat;RNA-binding		GO:0001556;GO:0003006;GO:0006139;GO:0006378;GO:0006396;GO:0006397;GO:0006807;GO:0008152;GO:0009987;GO:0016070;GO:0016071;GO:0021700;GO:0022414;GO:0031123;GO:0031124;GO:0032502;GO:0034641;GO:0043170;GO:0043631;GO:0044237;GO:0044238;GO:0044260;GO:0048469;GO:0048610;GO:0048869;GO:0090304	GO:0000166;GO:0003676;GO:0003723;GO:0005488	GO:0005737;GO:0031982;GO:0031988;GO:0043226;GO:0043227;GO:0043230;GO:0044421;GO:0044424;GO:0044464;GO:0065010;GO:0070062
16.6771411895752	17.2927532196045	18.0989265441895	17.7310543060303	17.4343681335449	16.906421661377	17.3775501251221	17.1154289245605	17.4324932098389	18.1677112579346	17.6785869598389	16.9219570159912	17.7044162750244	17.8986492156982	17.8712310791016	17.2717552185059	17.8995342254639	17.6747989654541	17.554048538208	17.46897315979	17.6582946777344	17.117359161377	17.0123634338379	17.7186660766602	17.6744537353516	18.1182727813721	17.8555011749268	17.1758232116699	17.1350078582764	17.9541282653809	17.3727970123291	17.3555240631104					biological regulation;cellular component organization;cellular component organization at cellular level;cellular component organization or biogenesis;cellular component organization or biogenesis at cellular level;cellular macromolecule metabolic process;cellular membrane organization;cellular metabolic process;cellular process;cellular response to stimulus;endomembrane system organization;endoso…	ARF guanyl-nucleotide exchange factor activity;binding;enzyme regulator activity;GABA receptor binding;GTPase regulator activity;guanyl-nucleotide exchange factor activity;nucleoside-triphosphatase regulator activity;protein binding;protein kinase A binding;protein kinase A regulatory subunit binding;receptor binding;small GTPase regulator activity	asymmetric synapse;axonemal microtubule;axoneme part;cell junction;cell part;cell projection;cell projection part;cytoplasmic membrane-bounded vesicle;cytoplasmic part;cytoplasmic vesicle;cytoskeletal part;cytosol;dendritic spine;endosome;Golgi apparatus part;Golgi membrane;intracellular membrane-bounded organelle;intracellular organelle;intracellular organelle part;intracellular part;macromolecu…	biological regulation;cellular component organization;cellular membrane organization;cellular metabolic process;cellular process;endosome organization;establishment of localization;exocytosis;Golgi vesicle transport;macromolecule metabolic process;membrane organization;metabolic process;organelle organization;protein transport;response to stimulus;secretion;signal transduction;transport;vesicle-m…	cell part;cell projection;cytoplasmic membrane-bounded vesicle;cytosol;endosome;intracellular membrane-bounded organelle;intracellular organelle;macromolecular complex;membrane;microtubule organizing center;neuron projection;organelle;protein complex;synapse;vesicle		DUF1981;Sec7	APPIERTO_RESPONSE_TO_FENRETINIDE_DN;BIOCARTA_ARAP_PATHWAY;BLALOCK_ALZHEIMERS_DISEASE_DN;BOYAULT_LIVER_CANCER_SUBCLASS_G23_UP;BROWNE_HCMV_INFECTION_16HR_UP;BUYTAERT_PHOTODYNAMIC_THERAPY_STRESS_UP;CELLULAR_LOCALIZATION;chr20q13;CREIGHTON_ENDOCRINE_THERAPY_RESISTANCE_3;CYTOPLASM;CYTOPLASMIC_PART;CYTOSOL;ENDOMEMBRANE_SYSTEM;ESTABLISHMENT_OF_CELLULAR_LOCALIZATION;ESTABLISHMENT_OF_LOCALIZATION;EXOCYTOS…	Acetylation;Celljunction;Cellprojection;Completeproteome;Cytoplasm;Cytoplasmicvesicle;Cytoskeleton;Endosome;Golgiapparatus;Guanine-nucleotidereleasingfactor;Membrane;Phosphoprotein;Proteintransport;Referenceproteome;Synapse;Transport		GO:0001817;GO:0001819;GO:0001881;GO:0006140;GO:0006810;GO:0006887;GO:0006892;GO:0006893;GO:0006996;GO:0007032;GO:0007165;GO:0008152;GO:0009894;GO:0009987;GO:0010256;GO:0015031;GO:0016043;GO:0016044;GO:0016192;GO:0019219;GO:0019222;GO:0030811;GO:0031323;GO:0031329;GO:0032680;GO:0032760;GO:0032940;GO:0033121;GO:0033124;GO:0035556;GO:0043085;GO:0043087;GO:0043112;GO:0043170;GO:0043547;GO:0044093;GO:…	GO:0005083;GO:0005085;GO:0005086;GO:0005102;GO:0005488;GO:0005515;GO:0030234;GO:0030695;GO:0034237;GO:0050811;GO:0051018;GO:0060589	GO:0000139;GO:0005768;GO:0005802;GO:0005815;GO:0005829;GO:0005874;GO:0005879;GO:0016020;GO:0016023;GO:0030054;GO:0031090;GO:0031410;GO:0031982;GO:0031988;GO:0032279;GO:0032280;GO:0032991;GO:0042995;GO:0043005;GO:0043197;GO:0043226;GO:0043227;GO:0043229;GO:0043231;GO:0043234;GO:0044309;GO:0044422;GO:0044424;GO:0044430;GO:0044431;GO:0044444;GO:0044446;GO:0044447;GO:0044463;GO:0044464;GO:0045202;GO:…
13.6819677352905	13.5619945526123	13.0608367919922	14.3591823577881	14.6043844223022	13.4802541732788	12.4452686309814	12.6835241317749	14.2313709259033	14.3429946899414	13.7175483703613	12.8887462615967	13.3909854888916	14.2239923477173	14.8038177490234	14.9320154190063	13.0739736557007	13.6051054000854	14.2372875213623	14.4902763366699	13.1564559936523	13.5303153991699	13.6340532302856	14.6459808349609	14.2952861785889	14.4699153900146	14.1554546356201	14.0737686157227	14.0884428024292	13.8997745513916	12.8263807296753	12.4085464477539					anatomical structure development;anterior/posterior pattern specification;biological regulation;biosynthetic process;brain development;cellular biosynthetic process;cellular component organization;cellular component organization at cellular level;cellular component organization or biogenesis;cellular component organization or biogenesis at cellular level;cellular macromolecule biosynthetic proces…	binding;cation binding;DNA binding;ion binding;metal ion binding;nucleic acid binding;protein binding;sequence-specific DNA binding;transcription factor binding;transition metal ion binding;zinc ion binding	cell part;chromatin remodeling complex;extracellular membrane-bounded organelle;extracellular organelle;extracellular region part;extracellular vesicular exosome;intracellular membrane-bounded organelle;intracellular organelle;intracellular organelle part;intracellular part;ISWI complex;macromolecular complex;membrane-bounded organelle;membrane-bounded vesicle;nuclear part;nucleoplasm;nucleus;NUR…	anatomical structure development;biological regulation;biosynthetic process;cellular component organization;cellular metabolic process;cellular nitrogen compound metabolic process;cellular process;chromatin modification;chromatin organization;chromosome organization;developmental process;macromolecule metabolic process;metabolic process;nitrogen compound metabolic process;nucleobase-containing co…	cell part;chromatin remodeling complex;extracellular organelle;intracellular membrane-bounded organelle;intracellular organelle;macromolecular complex;nucleoplasm;nucleus;organelle;protein complex;vesicle		Bromodomain;DDT;PHD;WHIM1	AACTTT_UNKNOWN;AATGGAG,MIR-136;ACCTGTTG_UNKNOWN;ANATOMICAL_STRUCTURE_DEVELOPMENT;ATCATGA,MIR-433;ATGAAGG,MIR-205;ATGTCAC,MIR-489;ATPASE_ACTIVITY;ATPASE_ACTIVITY_COUPLED;BASAKI_YBX1_TARGETS_DN;BIDUS_METASTASIS_UP;BILANGES_SERUM_SENSITIVE_VIA_TSC2;BIOPOLYMER_METABOLIC_PROCESS;BONCI_TARGETS_OF_MIR15A_AND_MIR16_1;BRAIN_DEVELOPMENT;CAGGTG_V$E12_Q6;CAGTATT,MIR-200B,MIR-200C,MIR-429;CATTGTYY_V$SOX9_B1;C…	Bromodomain;Completeproteome;Metal-binding;Proteomicsidentification;Referenceproteome;Zinc;Zinc-finger		GO:0000122;GO:0001892;GO:0003002;GO:0006139;GO:0006325;GO:0006338;GO:0006351;GO:0006355;GO:0006357;GO:0006807;GO:0006996;GO:0007389;GO:0007420;GO:0007492;GO:0008152;GO:0009058;GO:0009059;GO:0009888;GO:0009889;GO:0009890;GO:0009891;GO:0009892;GO:0009893;GO:0009952;GO:0009987;GO:0010468;GO:0010556;GO:0010557;GO:0010558;GO:0010604;GO:0010605;GO:0010628;GO:0010629;GO:0016043;GO:0016070;GO:0016568;GO:…	GO:0003676;GO:0003677;GO:0005488;GO:0005515;GO:0008134;GO:0008270;GO:0043167;GO:0043169;GO:0043565;GO:0046872;GO:0046914	GO:0005634;GO:0005654;GO:0016585;GO:0016589;GO:0031010;GO:0031982;GO:0031988;GO:0032991;GO:0043226;GO:0043227;GO:0043229;GO:0043230;GO:0043231;GO:0043234;GO:0044421;GO:0044422;GO:0044424;GO:0044428;GO:0044446;GO:0044464;GO:0065010;GO:0070062
15.7887439727783	12.7093715667725	14.8042316436768	15.9972677230835	15.7877244949341	15.9230260848999	15.9014329910278	14.789737701416	13.878960609436	16.3088359832764	15.279167175293	14.0420761108398	13.9065618515015	13.7977085113525	14.6627235412598	15.0441808700562	15.7255258560181	14.419828414917	15.5129871368408	14.5452718734741	14.7165517807007	14.3489208221436	12.7204580307007	13.6617403030396	13.1995067596436	16.4632530212402	14.6864309310913	14.3454055786133	12.9875211715698	15.1962566375732	15.112003326416	14.017352104187					chordate embryonic development;developmental process;embryo development;embryo development ending in birth or egg hatching;in utero embryonic development			developmental process;embryo development			Ank;Ank_2	ACEVEDO_FGFR1_TARGETS_IN_PROSTATE_CANCER_MODEL_DN;ACEVEDO_LIVER_CANCER_WITH_H3K27ME3_UP;ACEVEDO_METHYLATED_IN_LIVER_CANCER_DN;BUYTAERT_PHOTODYNAMIC_THERAPY_STRESS_UP;CAMP_UP.V1_DN;CERVERA_SDHB_TARGETS_1_UP;chr17q23;FIGUEROA_AML_METHYLATION_CLUSTER_3_UP;FIGUEROA_AML_METHYLATION_CLUSTER_4_UP;FIGUEROA_AML_METHYLATION_CLUSTER_6_UP;FIGUEROA_AML_METHYLATION_CLUSTER_7_UP;GCM_CRKL;GCM_MAP4K4;GOZGIT_ESR1_…	Alternativesplicing;ANKrepeat;Completeproteome;Glycoprotein;Phosphoprotein;Referenceproteome;Repeat;TPRrepeat		GO:0001701;GO:0009790;GO:0009792;GO:0032502;GO:0043009
13.3037805557251	13.5885343551636	13.5256433486938	15.4209794998169	13.6149396896362	13.9365463256836	14.4558410644531	13.398045539856	14.0816020965576	14.8333349227905	14.7806015014648	14.510308265686	14.5199794769287	13.6589479446411	13.457124710083	15.0580825805664	15.0949020385742	13.3915119171143	14.7992820739746	13.6788234710693	14.1867332458496	13.527361869812	13.0026502609253	14.3043937683105	13.8160104751587	15.1794424057007	13.2231044769287	14.9527416229248	13.6729774475098	13.8660163879395	14.1267070770264	13.2428979873657							cell part;integral to membrane;intrinsic to membrane;membrane part		cell part		UPF0560	chr17q21;GSE17974_IL4_AND_ANTI_IL12_VS_UNTREATED_4H_ACT_CD4_TCELL_DN;GSE19825_NAIVE_VS_DAY3_EFF_CD8_TCELL_UP;GSE19825_NAIVE_VS_IL2RAHIGH_DAY3_EFF_CD8_TCELL_UP;GSE19825_NAIVE_VS_IL2RALOW_DAY3_EFF_CD8_TCELL_UP;GSE7400_CTRL_VS_CSF3_IN_VIVO_TREATED_PBMC_DN;SCHAEFFER_PROSTATE_DEVELOPMENT_6HR_DN	Alternativesplicing;Completeproteome;Glycoprotein;Membrane;Referenceproteome;Signal;Transmembrane;Transmembranehelix				GO:0016021;GO:0031224;GO:0044425;GO:0044464
18.284236907959	18.6418476104736	18.1991634368896	14.5412158966064	19.0365753173828	18.2089576721191	17.927001953125	18.1257057189941	18.593355178833	17.9464378356934	18.3271579742432	18.4176959991455	18.9654750823975	18.4136943817139	18.2764873504639	18.3743267059326	18.0831680297852	18.1964778900146	17.949348449707	18.1782073974609	18.2169361114502	18.300594329834	17.2347240447998	18.379243850708	18.7719478607178	17.8139686584473	18.1664371490479	17.6164779663086	18.6155433654785	18.460319519043	18.284553527832	18.7141456604004					cell cycle process;cellular macromolecule metabolic process;cellular metabolic process;cellular process;cellular protein metabolic process;macromolecule metabolic process;macromolecule modification;metabolic process;mitotic metaphase/anaphase transition;primary metabolic process;protein K11-linked ubiquitination;protein metabolic process;protein modification by small protein conjugation;protein m…	binding;enzyme binding;phosphatase binding;protein binding;protein phosphatase binding	anaphase-promoting complex;cell part;centrosome;cullin-RING ubiquitin ligase complex;cytoplasm;cytoplasmic part;cytoskeletal part;intracellular membrane-bounded organelle;intracellular non-membrane-bounded organelle;intracellular organelle;intracellular organelle part;intracellular part;macromolecular complex;membrane-bounded organelle;microtubule;microtubule organizing center;non-membrane-bounde…	cellular metabolic process;cellular process;macromolecule metabolic process;macromolecule modification;metabolic process;primary metabolic process;protein metabolic process;protein modification by small protein conjugation or removal;protein modification process	cell part;centrosome;cytoplasm;intracellular membrane-bounded organelle;intracellular non-membrane-bounded organelle;intracellular organelle;macromolecular complex;microtubule organizing center;nucleoplasm;nucleus;organelle;protein complex;ubiquitin ligase complex	Cell cycle;Cell cycle - yeast;Meiosis - yeast;Oocyte meiosis;Progesterone-mediated oocyte maturation;Ubiquitin mediated proteolysis	TPR_1;TPR_2	AGUIRRE_PANCREATIC_CANCER_COPY_NUMBER_UP;AMIT_EGF_RESPONSE_120_HELA;BENPORATH_CYCLING_GENES;BLALOCK_ALZHEIMERS_DISEASE_DN;BLALOCK_ALZHEIMERS_DISEASE_INCIPIENT_DN;BORCZUK_MALIGNANT_MESOTHELIOMA_UP;BROWNE_HCMV_INFECTION_18HR_UP;CAIRO_HEPATOBLASTOMA_CLASSES_UP;CATTGTYY_V$SOX9_B1;CELL_CYCLE_GO_0007049;CELL_CYCLE_PHASE;CELL_CYCLE_PROCESS;CELL_PROLIFERATION_GO_0008283;CENTROSOME;CHARAFE_BREAST_CANCER_L…	Alternativesplicing;Completeproteome;Nucleus;Phosphoprotein;Referenceproteome;Repeat;TPRrepeat;Ublconjugationpathway		GO:0000209;GO:0006464;GO:0007091;GO:0008152;GO:0009987;GO:0016567;GO:0019538;GO:0022402;GO:0032446;GO:0043170;GO:0043412;GO:0044237;GO:0044238;GO:0044260;GO:0044267;GO:0070647;GO:0070979	GO:0005488;GO:0005515;GO:0019899;GO:0019902;GO:0019903	GO:0000151;GO:0000152;GO:0005634;GO:0005654;GO:0005680;GO:0005737;GO:0005813;GO:0005815;GO:0005874;GO:0005876;GO:0031461;GO:0032991;GO:0043226;GO:0043227;GO:0043228;GO:0043229;GO:0043231;GO:0043232;GO:0043234;GO:0044422;GO:0044424;GO:0044428;GO:0044430;GO:0044444;GO:0044446;GO:0044464
13.3205032348633	13.4886655807495	13.9937238693237	13.168646812439	13.1515960693359	12.8429594039917	14.6432771682739	13.1238145828247	12.512469291687	13.4523429870605	13.3903036117554	13.3209419250488	15.0622024536133	13.1516828536987	13.7464923858643	12.6817216873169	13.7430658340454	13.4553270339966	14.7904787063599	15.6268453598022	14.6098718643188	12.910774230957	14.1607313156128	15.1147594451904	13.8269243240356	13.5771923065186	14.2707328796387	13.4618635177612	14.8039541244507	12.4974660873413	13.2135753631592	12.8446474075317												AACTGGA,MIR-145;AACTTT_UNKNOWN;AMIT_SERUM_RESPONSE_120_MCF10A;BLALOCK_ALZHEIMERS_DISEASE_UP;BROWNE_HCMV_INFECTION_10HR_UP;BROWNE_HCMV_INFECTION_20HR_UP;BROWNE_HCMV_INFECTION_6HR_UP;BURTON_ADIPOGENESIS_PEAK_AT_2HR;BUYTAERT_PHOTODYNAMIC_THERAPY_STRESS_UP;CAATGCA,MIR-33;CAHOY_OLIGODENDROCUTIC;CATTGTYY_V$SOX9_B1;chr17q25;CTCAGGG,MIR-125B,MIR-125A;CTTTGT_V$LEF1_Q2;CYCLIN_D1_KE_.V1_UP;E2F1_UP.V1_UP;GAT…	Coiledcoil;Completeproteome;Phosphoprotein;Referenceproteome
14.4010829925537	11.9187564849854	14.6409339904785	13.2436103820801	13.5115356445313	15.0551834106445	13.9597234725952	13.825005531311	13.9589109420776	12.9038848876953	14.3544864654541	13.5213317871094	14.4061622619629	13.726224899292	13.5042285919189	13.9360370635986	14.8294334411621	14.1123399734497	13.3822660446167	14.4883441925049	13.8367757797241	14.1499767303467	13.7961540222168	14.6414003372192	14.3044090270996	14.1658935546875	14.7121229171753	13.7103319168091	14.1194219589233	12.5716190338135	14.7215051651001	14.4610824584961					cellular process;cellular response to chemical stimulus;cellular response to cholesterol;cellular response to lipid;cellular response to organic substance;cellular response to stimulus;establishment of localization;lipid transport;organic substance transport;response to chemical stimulus;response to cholesterol;response to lipid;response to organic substance;response to stimulus;transport	binding;cholesterol binding;lipid binding;steroid binding;sterol binding	autophagic vacuole;cell part;cytoplasmic part;cytosol;endoplasmic reticulum part;intracellular membrane-bounded organelle;intracellular organelle;intracellular organelle part;intracellular part;membrane;membrane-bounded organelle;organelle;organelle part;perinuclear endoplasmic reticulum;plasma membrane;vacuole	cellular process;establishment of localization;lipid transport;response to chemical stimulus;response to stimulus;transport	cell part;cytosol;intracellular membrane-bounded organelle;intracellular organelle;membrane;organelle;plasma membrane;vacuole		Oxysterol_BP	AACTTT_UNKNOWN;ACATTCC,MIR-1,MIR-206;ATGTAGC,MIR-221,MIR-222;CAGGTG_V$E12_Q6;chr17q21;CTGCAGY_UNKNOWN;DODD_NASOPHARYNGEAL_CARCINOMA_UP;GGGAGGRR_V$MAZ_Q6;GSE11924_TFH_VS_TH17_CD4_TCELL_UP;GSE13493_CD4INTCD8POS_VS_CD8POS_THYMOCYTE_DN;GSE17974_0H_VS_0.5H_IN_VITRO_ACT_CD4_TCELL_UP;GSE17974_CTRL_VS_ACT_IL4_AND_ANTI_IL12_0.5H_CD4_TCELL_UP;GSE22886_NAIVE_CD4_TCELL_VS_12H_ACT_TH2_UP;GSE27786_BCELL_VS_NEU…	Completeproteome;Lipidtransport;Proteomicsidentification;Referenceproteome;Transport		GO:0006810;GO:0006869;GO:0009987;GO:0010033;GO:0033993;GO:0042221;GO:0050896;GO:0051234;GO:0051716;GO:0070723;GO:0070887;GO:0071310;GO:0071396;GO:0071397;GO:0071702	GO:0005488;GO:0005496;GO:0008289;GO:0015485;GO:0032934	GO:0005773;GO:0005776;GO:0005829;GO:0005886;GO:0016020;GO:0043226;GO:0043227;GO:0043229;GO:0043231;GO:0044422;GO:0044424;GO:0044432;GO:0044444;GO:0044446;GO:0044464;GO:0097038
13.5969676971436	14.3402986526489	13.1109504699707	14.5392351150513	13.637809753418	14.1194543838501	14.3051843643188	14.1487064361572	12.6804170608521	14.1931056976318	14.1108541488647	13.8778247833252	14.7086181640625	14.41930103302	13.4486541748047	14.4220485687256	13.7097911834717	14.0442428588867	13.3917293548584	13.805401802063	13.4603853225708	13.9455480575562	12.9974298477173	13.8449993133545	14.359320640564	14.4317331314087	15.1014595031738	13.8603172302246	14.926248550415	13.9104347229004	14.366943359375	15.1352214813232					biological regulation;determination of adult lifespan;multicellular organismal process;regulation of biological process;regulation of biosynthetic process;regulation of cellular biosynthetic process;regulation of cellular macromolecule biosynthetic process;regulation of cellular metabolic process;regulation of cellular process;regulation of gene expression;regulation of macromolecule biosynthetic…	binding;cation binding;DNA binding;ion binding;metal ion binding;nucleic acid binding	cell part;cytoplasmic part;Golgi apparatus;intracellular membrane-bounded organelle;intracellular organelle;intracellular part;membrane-bounded organelle;nucleus;organelle	biological regulation;multicellular organismal process	cell part;Golgi apparatus;intracellular membrane-bounded organelle;intracellular organelle;nucleus;organelle		SET;zf-C2H2	AAAGGGA,MIR-204,MIR-211;BLALOCK_ALZHEIMERS_DISEASE_UP;BROWNE_HCMV_INFECTION_4HR_DN;BROWNE_HCMV_INFECTION_6HR_DN;BRUINS_UVC_RESPONSE_VIA_TP53_GROUP_A;chr1p36;CONCANNON_APOPTOSIS_BY_EPOXOMICIN_UP;CTACCTC,LET-7A,LET-7B,LET-7C,LET-7D,LET-7E,LET-7F,MIR-98,LET-7G,LET-7I;CTATGCA,MIR-153;CTTTGA_V$LEF1_Q2;DACOSTA_LOW_DOSE_UV_RESPONSE_VIA_ERCC3_XPCS_UP;DOANE_RESPONSE_TO_ANDROGEN_DN;ENK_UV_RESPONSE_EPIDERMI…	Completeproteome;Proteomicsidentification;Referenceproteome		GO:0006355;GO:0008340;GO:0009889;GO:0010468;GO:0010556;GO:0019219;GO:0019222;GO:0031323;GO:0031326;GO:0032501;GO:0050789;GO:0050794;GO:0051171;GO:0051252;GO:0060255;GO:0065007;GO:0080090;GO:2000112	GO:0003676;GO:0003677;GO:0005488;GO:0043167;GO:0043169;GO:0046872	GO:0005634;GO:0005794;GO:0043226;GO:0043227;GO:0043229;GO:0043231;GO:0044424;GO:0044444;GO:0044464
14.7854013442993	16.9260177612305	15.0826892852783	13.3888387680054	16.5775032043457	15.4971342086792	15.9481391906738	16.28395652771	16.3185081481934	16.3283939361572	15.729302406311	16.0778388977051	17.2377147674561	17.564208984375	15.7336511611938	16.7313194274902	15.4432029724121	16.3266048431396	13.6588850021362	17.3974075317383	16.1699638366699	15.7521457672119	15.3774137496948	16.2564296722412	16.5619297027588	14.6033210754395	17.1215133666992	15.8350143432617	16.5105476379395	16.4439468383789	17.4155101776123	15.9375581741333					anatomical structure morphogenesis;biological adhesion;biological regulation;cell adhesion;cell migration;cell motility;cell part morphogenesis;cell projection morphogenesis;cell projection organization;cellular component morphogenesis;cellular component movement;cellular component organization;cellular component organization at cellular level;cellular component organization or biogenesis;cellula…	binding;carbohydrate binding;catalytic activity;chondroitin sulfate proteoglycan binding;glycoprotein binding;glycosaminoglycan binding;heparin binding;hydrolase activity;hydrolase activity, acting on ester bonds;pattern binding;phosphatase activity;phosphoprotein phosphatase activity;phosphoric ester hydrolase activity;polysaccharide binding;protein binding;protein complex binding;protein tyrosi…	cell body;cell part;cell projection;extracellular membrane-bounded organelle;extracellular organelle;extracellular region part;extracellular vesicular exosome;integral to membrane;intrinsic to membrane;membrane part;membrane-bounded organelle;membrane-bounded vesicle;neuron projection;neuronal cell body;organelle;vesicle	anatomical structure morphogenesis;biological adhesion;biological regulation;cell adhesion;cell motility;cellular component morphogenesis;cellular component movement;cellular component organization;cellular metabolic process;cellular process;developmental process;locomotion;macromolecule metabolic process;macromolecule modification;metabolic process;phosphorus metabolic process;primary metabolic …	cell body;cell part;cell projection;extracellular organelle;neuron projection;neuronal cell body;organelle;vesicle	Adherens junction;Cell adhesion molecules (CAMs);Insulin signaling pathway	fn3;I-set;Y_phosphatase	AACATTC,MIR-409-3P;AACTTT_UNKNOWN;AGCTCCT,MIR-28;ALK_DN.V1_DN;AMIT_EGF_RESPONSE_480_HELA;BENPORATH_MYC_MAX_TARGETS;BLALOCK_ALZHEIMERS_DISEASE_UP;BRUECKNER_TARGETS_OF_MIRLET7A3_DN;BYSTRYKH_HEMATOPOIESIS_STEM_CELL_AND_BRAIN_QTL_CIS;BYSTRYKH_HEMATOPOIESIS_STEM_CELL_QTL_CIS;CAGGTA_V$AREB6_01;CELL_SURFACE_RECEPTOR_LINKED_SIGNAL_TRANSDUCTION_GO_0007166;CHARAFE_BREAST_CANCER_LUMINAL_VS_BASAL_UP;chr1p34;…	3D-structure;Celladhesion;Completeproteome;Disulfidebond;Glycoprotein;Heparin-binding;Hydrolase;Immunoglobulindomain;Membrane;Phosphoprotein;Proteinphosphatase;Receptor;Referenceproteome;Repeat;Signal;Transmembrane;Transmembranehelix		GO:0006464;GO:0006470;GO:0006793;GO:0006796;GO:0006928;GO:0006950;GO:0007155;GO:0008152;GO:0009653;GO:0009987;GO:0010769;GO:0010975;GO:0016043;GO:0016311;GO:0016477;GO:0019538;GO:0022603;GO:0022604;GO:0022610;GO:0030030;GO:0031099;GO:0031102;GO:0031344;GO:0032101;GO:0032502;GO:0032989;GO:0032990;GO:0033554;GO:0035335;GO:0040011;GO:0043170;GO:0043412;GO:0044237;GO:0044238;GO:0044260;GO:0044267;GO:…	GO:0001871;GO:0001948;GO:0003824;GO:0004721;GO:0004725;GO:0005488;GO:0005515;GO:0005539;GO:0008201;GO:0016787;GO:0016788;GO:0016791;GO:0030246;GO:0030247;GO:0032403;GO:0035373;GO:0042578;GO:0043394	GO:0016021;GO:0031224;GO:0031982;GO:0031988;GO:0042995;GO:0043005;GO:0043025;GO:0043226;GO:0043227;GO:0043230;GO:0044297;GO:0044421;GO:0044425;GO:0044464;GO:0065010;GO:0070062
15.9103145599365	16.278450012207	13.852466583252	13.8033447265625	14.5571222305298	14.3876132965088	14.0147666931152	13.4951057434082	13.6737985610962	13.4248723983765	14.7489986419678	15.836124420166	14.8119192123413	14.3761892318726	14.1847562789917	12.8706483840942	12.8100214004517	14.8422222137451	14.2368297576904	13.7290744781494	15.5523691177368	13.0133008956909	14.472282409668	13.7831373214722	13.1785535812378	14.4362182617188	13.4431791305542	13.0099277496338	14.2777462005615	13.2495203018188	14.5990924835205	14.2914409637451					biological regulation;cell surface receptor linked signaling pathway;cellular component assembly;cellular component assembly at cellular level;cellular component organization;cellular component organization at cellular level;cellular component organization or biogenesis;cellular component organization or biogenesis at cellular level;cellular macromolecular complex assembly;cellular macromolecular…	1-phosphatidylinositol binding;binding;cation binding;ion binding;lipid binding;metal ion binding;phosphatidylinositol binding;phospholipid binding;protein binding;SMAD binding	cell part;cytoplasm;cytoplasmic part;early endosome membrane;endosomal part;endosome membrane;intracellular organelle part;intracellular part;membrane;organelle membrane;organelle part	biological regulation;cellular component assembly;cellular component organization;cellular macromolecular complex assembly;cellular process;establishment of localization;macromolecular complex assembly;nuclear transport;nucleocytoplasmic transport;protein complex assembly;protein targeting;protein transport;response to stimulus;signal transduction;transport	cell part;cytoplasm;membrane	Endocytosis;TGF-beta signaling pathway	DUF3480;FYVE;SARA	AACTGGA,MIR-145;ACTGAAA,MIR-30A-3P,MIR-30E-3P;BIOCARTA_TGFB_PATHWAY;BONOME_OVARIAN_CANCER_SURVIVAL_OPTIMAL_DEBULKING;BROWNE_HCMV_INFECTION_1HR_DN;CAGGTG_V$E12_Q6;CELL_SURFACE_RECEPTOR_LINKED_SIGNAL_TRANSDUCTION_GO_0007166;CELLULAR_COMPONENT_ASSEMBLY;CELLULAR_LOCALIZATION;CELLULAR_MACROMOLECULE_METABOLIC_PROCESS;CELLULAR_PROTEIN_COMPLEX_ASSEMBLY;CELLULAR_PROTEIN_METABOLIC_PROCESS;chr1p33;CTATGCA,M…	Completeproteome;Metal-binding;Proteomicsidentification;Referenceproteome;Zinc;Zinc-finger		GO:0006461;GO:0006605;GO:0006606;GO:0006810;GO:0006886;GO:0006913;GO:0007165;GO:0007166;GO:0007167;GO:0007178;GO:0007179;GO:0007183;GO:0007184;GO:0009966;GO:0009987;GO:0015031;GO:0016043;GO:0017015;GO:0017038;GO:0022607;GO:0023051;GO:0034621;GO:0034622;GO:0043623;GO:0043933;GO:0045184;GO:0046907;GO:0048583;GO:0050789;GO:0050794;GO:0050896;GO:0051169;GO:0051170;GO:0051234;GO:0051649;GO:0051716;GO:…	GO:0005488;GO:0005515;GO:0005543;GO:0005545;GO:0008289;GO:0035091;GO:0043167;GO:0043169;GO:0046332;GO:0046872	GO:0005737;GO:0010008;GO:0016020;GO:0031090;GO:0031901;GO:0044422;GO:0044424;GO:0044440;GO:0044444;GO:0044446;GO:0044464
18.1705017089844	18.7281322479248	17.7122993469238	17.9611549377441	18.3784809112549	18.3686256408691	18.624174118042	18.1024169921875	12.2568101882935	18.9728679656982	18.6534404754639	17.7762279510498	19.0480403900146	18.3267631530762	15.5091867446899	18.9553775787354	18.3710117340088	18.6110820770264	18.6047992706299	15.0144004821777	17.7183322906494	15.378849029541	19.0659217834473	18.2063846588135	18.3519058227539	18.6876010894775	18.5450248718262	14.0366945266724	18.4050750732422	18.5666255950928	18.3376045227051	18.8457355499268					establishment of localization;lipid transport;organic substance transport;transport	binding;lipid binding	cell part;cytoplasm;cytoplasmic part;endosomal part;endosome membrane;Golgi apparatus;intracellular membrane-bounded organelle;intracellular organelle;intracellular organelle part;intracellular part;late endosome membrane;membrane;membrane-bounded organelle;organelle;organelle membrane;organelle part	establishment of localization;lipid transport;transport	cell part;cytoplasm;Golgi apparatus;intracellular membrane-bounded organelle;intracellular organelle;membrane;organelle		Oxysterol_BP;PH	AACTTT_UNKNOWN;BAKKER_FOXO3_TARGETS_UP;BOYAULT_LIVER_CANCER_SUBCLASS_G6_DN;BRUINS_UVC_RESPONSE_LATE;BYSTRYKH_HEMATOPOIESIS_STEM_CELL_QTL_TRANS;CAGGTG_V$E12_Q6;CHARAFE_BREAST_CANCER_LUMINAL_VS_BASAL_DN;chr1p32;CTCAGGG,MIR-125B,MIR-125A;CTTTAAR_UNKNOWN;DITTMER_PTHLH_TARGETS_UP;DORSAM_HOXA9_TARGETS_UP;GATTGGY_V$NFY_Q6_01;GOBERT_OLIGODENDROCYTE_DIFFERENTIATION_DN;GRAESSMANN_APOPTOSIS_BY_DOXORUBICIN_D…	Acetylation;Alternativesplicing;Completeproteome;Endosome;Golgiapparatus;Lipid-binding;Lipidtransport;Membrane;Phosphoprotein;Referenceproteome;Transport		GO:0006810;GO:0006869;GO:0051234;GO:0071702	GO:0005488;GO:0008289	GO:0005737;GO:0005794;GO:0010008;GO:0016020;GO:0031090;GO:0031902;GO:0043226;GO:0043227;GO:0043229;GO:0043231;GO:0044422;GO:0044424;GO:0044440;GO:0044444;GO:0044446;GO:0044464
13.9579439163208	16.5621376037598	18.1729946136475	18.4635963439941	17.4859714508057	17.801139831543	17.2715721130371	17.3369083404541	13.078200340271	17.7472743988037	16.6714859008789	17.0508060455322	14.0578947067261	14.8306226730347	14.2949542999268	16.92995262146	17.1534328460693	13.3564682006836	18.1555099487305	16.4368419647217	17.4766674041748	16.9444370269775	18.4635562896729	16.6595497131348	14.2692537307739	18.9276103973389	13.2796392440796	17.0222587585449	17.0353145599365	17.5877628326416	16.6977825164795	17.7633152008057					adipose tissue development;anatomical structure development;biological regulation;cell differentiation;cellular developmental process;cellular localization;cellular process;developmental process;fat cell differentiation;gamete generation;lipid localization;lipid metabolic process;lipid storage;localization;macromolecule localization;male gamete generation;metabolic process;multicellular organisma…		cell part;integral to membrane;intracellular membrane-bounded organelle;intracellular organelle;intracellular part;intrinsic to membrane;membrane part;membrane-bounded organelle;nucleus;organelle	anatomical structure development;biological regulation;cell differentiation;cellular localization;cellular process;developmental process;lipid metabolic process;localization;metabolic process;multicellular organismal process;organelle localization;primary metabolic process	cell part;intracellular membrane-bounded organelle;intracellular organelle;nucleus;organelle		FSA_C	CHANG_CORE_SERUM_RESPONSE_DN;chr4q28;CLAUS_PGR_POSITIVE_MENINGIOMA_UP;DACOSTA_UV_RESPONSE_VIA_ERCC3_COMMON_DN;DACOSTA_UV_RESPONSE_VIA_ERCC3_DN;DUTERTRE_ESTRADIOL_RESPONSE_24HR_DN;FLECHNER_BIOPSY_KIDNEY_TRANSPLANT_OK_VS_DONOR_UP;FLECHNER_BIOPSY_KIDNEY_TRANSPLANT_REJECTED_VS_OK_DN;FOSTER_TOLERANT_MACROPHAGE_DN;GCM_DEAF1;GCM_DLG1;GCM_ERBB2IP;GCM_MAP4K4;GCM_PTK2;GCM_PTPRD;GCM_RAN;GRAESSMANN_APOPTOSIS…	Alternativesplicing;Completeproteome;Membrane;Phosphoprotein;Referenceproteome;Transmembrane;Transmembranehelix		GO:0001558;GO:0006629;GO:0007276;GO:0007283;GO:0008152;GO:0009888;GO:0009987;GO:0010876;GO:0019915;GO:0022414;GO:0030154;GO:0032501;GO:0032502;GO:0033036;GO:0040008;GO:0044238;GO:0045444;GO:0048232;GO:0048609;GO:0048856;GO:0048869;GO:0050789;GO:0050794;GO:0051128;GO:0051179;GO:0051640;GO:0051641;GO:0051647;GO:0060612;GO:0065007		GO:0005634;GO:0016021;GO:0031224;GO:0043226;GO:0043227;GO:0043229;GO:0043231;GO:0044424;GO:0044425;GO:0044464
14.2457218170166	13.0075206756592	14.4932289123535	13.4144325256348	13.0162477493286	14.3148527145386	13.9392099380493	13.1991195678711	14.3608627319336	13.6499300003052	13.4402179718018	12.5676431655884	13.7158813476563	13.6016674041748	13.2433195114136	14.9613485336304	12.7673349380493	13.5892925262451	13.841685295105	14.0766067504883	13.3774003982544	14.0779781341553	15.4262924194336	13.6893968582153	15.0446434020996	14.0432834625244	15.8056516647339	13.7119922637939	13.1988439559937	13.0754709243774	14.338152885437	13.3139953613281					adipose tissue development;anatomical structure development;biological regulation;bone development;cell differentiation;cellular component assembly;cellular component disassembly;cellular component disassembly at cellular level;cellular component organization;cellular component organization at cellular level;cellular component organization or biogenesis;cellular component organization or biogenes…	binding;lipid binding;phosphatidylinositol binding;phosphatidylinositol-3,5-bisphosphate binding;phosphatidylinositol-3-phosphate binding;phosphatidylinositol-4-phosphate binding;phosphatidylinositol-5-phosphate binding;phospholipid binding;protein binding;protein domain specific binding;SH2 domain binding	cell junction;cell part;cell projection;cytoplasm;cytoskeletal part;intracellular non-membrane-bounded organelle;intracellular organelle;intracellular organelle part;intracellular part;macromolecular complex;non-membrane-bounded organelle;organelle;organelle part;podosome;protein complex	anatomical structure development;biological regulation;cell differentiation;cellular component assembly;cellular component disassembly;cellular component organization;cellular localization;cellular membrane organization;cellular metabolic process;cellular process;developmental process;extracellular matrix organization;extracellular structure organization;localization;macromolecular complex assemb…	cell part;cell projection;cytoplasm;intracellular non-membrane-bounded organelle;intracellular organelle;macromolecular complex;organelle;protein complex		PX;SH3_1;SH3_2	ACEVEDO_METHYLATED_IN_LIVER_CANCER_DN;chr5q35;GSE14350_TREG_VS_TEFF_DN;GSE15324_NAIVE_VS_ACTIVATED_CD8_TCELL_DN;GSE15659_TREG_VS_TCONV_UP;GSE7460_CTRL_VS_TGFB_TREATED_ACT_FOXP3_MUT_TCONV_UP;GTGCCAA,MIR-96;IVANOVA_HEMATOPOIESIS_STEM_CELL_AND_PROGENITOR;LINDVALL_IMMORTALIZED_BY_TERT_DN;LIU_PROSTATE_CANCER_DN;PATIL_LIVER_CANCER;RICKMAN_TUMOR_DIFFERENTIATED_MODERATELY_VS_POORLY_UP;RICKMAN_TUMOR_DIFFE…	Celljunction;Cellprojection;Completeproteome;Cytoplasm;Differentiation;Phosphoprotein;Referenceproteome;Repeat;SH3domain		GO:0001501;GO:0001654;GO:0006461;GO:0006801;GO:0007423;GO:0007507;GO:0008104;GO:0008152;GO:0009888;GO:0009987;GO:0016043;GO:0016044;GO:0022411;GO:0022607;GO:0022617;GO:0030154;GO:0030198;GO:0032502;GO:0033036;GO:0034613;GO:0043062;GO:0043933;GO:0044237;GO:0045595;GO:0045597;GO:0045598;GO:0045600;GO:0048513;GO:0048518;GO:0048522;GO:0048731;GO:0048856;GO:0048869;GO:0050789;GO:0050793;GO:0050794;GO:…	GO:0005488;GO:0005515;GO:0005543;GO:0008289;GO:0010314;GO:0019904;GO:0032266;GO:0035091;GO:0042169;GO:0070273;GO:0080025	GO:0002102;GO:0005737;GO:0030054;GO:0032991;GO:0042995;GO:0043226;GO:0043228;GO:0043229;GO:0043232;GO:0043234;GO:0044422;GO:0044424;GO:0044430;GO:0044446;GO:0044464
13.8276023864746	12.7654619216919	13.8260402679443	14.2155208587646	14.0647945404053	14.8126287460327	14.2961959838867	14.0988445281982	14.8529710769653	13.7390632629395	13.028000831604	13.4626026153564	14.4084711074829	13.3961982727051	13.8247394561768	13.4689197540283	14.3890781402588	14.7167234420776	13.2273635864258	13.4125003814697	13.6331243515015	13.7380332946777	12.0857706069946	13.7858505249023	14.4909763336182	14.1240358352661	14.3735599517822	12.8891878128052	13.7152881622314	13.5531969070435	14.2941389083862	14.2341594696045					biological regulation;cellular component organization;cellular component organization or biogenesis;cellular membrane organization;cellular process;cellular response to stimulus;endocytosis;establishment of localization;membrane invagination;membrane organization;positive regulation of catalytic activity;positive regulation of GTPase activity;positive regulation of hydrolase activity;positive reg…	binding;enzyme activator activity;enzyme regulator activity;GTPase activator activity;GTPase regulator activity;nucleoside-triphosphatase regulator activity;protein binding;protein domain specific binding;SH3 domain binding	cell part;cytoplasmic part;endosome;intracellular;intracellular membrane-bounded organelle;intracellular organelle;intracellular part;membrane;membrane-bounded organelle;organelle	biological regulation;cellular component organization;cellular membrane organization;cellular process;endocytosis;establishment of localization;membrane invagination;membrane organization;response to stimulus;signal transduction;transport;vesicle-mediated transport	cell part;endosome;intracellular;intracellular membrane-bounded organelle;intracellular organelle;membrane;organelle		PH;RhoGAP;WW	AATGTGA,MIR-23A,MIR-23B;BILD_HRAS_ONCOGENIC_SIGNATURE;BRUINS_UVC_RESPONSE_LATE;CDC42_PROTEIN_SIGNAL_TRANSDUCTION;CHANDRAN_METASTASIS_DN;chr17q21;CREIGHTON_ENDOCRINE_THERAPY_RESISTANCE_3;ENZYME_ACTIVATOR_ACTIVITY;ENZYME_REGULATOR_ACTIVITY;ESC_V6.5_UP_EARLY.V1_UP;ESTABLISHMENT_OF_LOCALIZATION;FEVR_CTNNB1_TARGETS_DN;FIGUEROA_AML_METHYLATION_CLUSTER_2_UP;FIGUEROA_AML_METHYLATION_CLUSTER_4_UP;FIGUEROA…	Alternativesplicing;Completeproteome;Cytoplasm;Endocytosis;GTPaseactivation;Membrane;Phosphoprotein;Referenceproteome;Repeat;SH3domain		GO:0006140;GO:0006810;GO:0006897;GO:0006898;GO:0007165;GO:0009894;GO:0009987;GO:0010324;GO:0016043;GO:0016044;GO:0016192;GO:0019219;GO:0019222;GO:0030811;GO:0031323;GO:0031329;GO:0033121;GO:0033124;GO:0043085;GO:0043087;GO:0043547;GO:0044093;GO:0050789;GO:0050790;GO:0050794;GO:0050896;GO:0051171;GO:0051234;GO:0051336;GO:0051345;GO:0051716;GO:0061024;GO:0065007;GO:0065009;GO:0071840;GO:0080090	GO:0005096;GO:0005488;GO:0005515;GO:0008047;GO:0017124;GO:0019904;GO:0030234;GO:0030695;GO:0060589	GO:0005622;GO:0005768;GO:0016020;GO:0043226;GO:0043227;GO:0043229;GO:0043231;GO:0044424;GO:0044444;GO:0044464
16.1692390441895	12.3501815795898	16.1068286895752	15.5005931854248	16.4981174468994	16.0027484893799	16.2186012268066	16.3051357269287	15.0516767501831	16.055980682373	14.7238597869873	14.8330068588257	14.0370864868164	14.425630569458	16.4119415283203	17.0283164978027	16.254789352417	14.0800304412842	16.3497829437256	15.084080696106	15.2710981369019	15.086332321167	15.4233026504517	13.6476602554321	15.4018125534058	16.2345561981201	13.5358858108521	16.6569004058838	16.4728660583496	14.0201511383057	13.4625720977783	15.5963640213013						aspartic-type endopeptidase activity;aspartic-type peptidase activity;catalytic activity;endopeptidase activity;hydrolase activity;peptidase activity;peptidase activity, acting on L-amino acid peptides					Asp_protease;ubiquitin	CHARAFE_BREAST_CANCER_LUMINAL_VS_MESENCHYMAL_UP;chr1p36;CTACCTC,LET-7A,LET-7B,LET-7C,LET-7D,LET-7E,LET-7F,MIR-98,LET-7G,LET-7I;DOUGLAS_BMI1_TARGETS_DN;GRAESSMANN_APOPTOSIS_BY_DOXORUBICIN_DN;GSE13306_RA_VS_UNTREATED_TREG_UP;GSE14308_TH1_VS_TH17_DN;GSE14308_TH2_VS_TH17_DN;GSE14769_20MIN_VS_360MIN_LPS_BMDM_UP;GSE2197_CPG_DNA_VS_UNTREATED_IN_DC_DN;GSE26669_CTRL_VS_COSTIM_BLOCK_MLR_CD8_TCELL_DN;GSE270…	Completeproteome;Phosphoprotein;Referenceproteome			GO:0003824;GO:0004175;GO:0004190;GO:0008233;GO:0016787;GO:0070001;GO:0070011
18.5301246643066	19.1019287109375	18.7042140960693	18.4911880493164	17.9222469329834	19.1299877166748	18.2305545806885	18.5133724212646	19.525505065918	17.923002243042	19.1562271118164	19.043909072876	19.6269397735596	19.5819835662842	18.7103481292725	18.7781543731689	18.237434387207	18.9999771118164	18.1402606964111	19.3047657012939	19.0254802703857	19.5996341705322	18.9944648742676	19.38942527771	18.777286529541	17.9174194335938	19.4954490661621	19.1760177612305	19.2450466156006	18.2199630737305	19.3945846557617	19.2506771087646					actin cytoskeleton organization;actin filament organization;actin filament-based process;biological regulation;cellular component organization;cellular component organization at cellular level;cellular component organization or biogenesis;cellular component organization or biogenesis at cellular level;cellular process;cytoskeleton organization;maintenance of location;maintenance of protein locati…	actin binding;actin monomer binding;binding;cytoskeletal protein binding;protein binding	actin filament bundle;actomyosin;cell part;cytoplasm;cytoskeletal part;filamentous actin;intracellular organelle part;intracellular part;macromolecular complex;organelle part;protein complex;stress fiber	biological regulation;cellular component organization;cellular process;cytoskeleton organization;organelle organization;regulation of organelle organization	cell part;cytoplasm;macromolecular complex;protein complex		Thymosin		Completeproteome;Proteomicsidentification;Referenceproteome		GO:0006996;GO:0007010;GO:0007015;GO:0008064;GO:0009987;GO:0010639;GO:0016043;GO:0030029;GO:0030036;GO:0030832;GO:0030833;GO:0030837;GO:0031333;GO:0032231;GO:0032232;GO:0032271;GO:0032272;GO:0032535;GO:0032956;GO:0032970;GO:0033043;GO:0042989;GO:0043254;GO:0044087;GO:0045185;GO:0048519;GO:0048523;GO:0050789;GO:0050794;GO:0051128;GO:0051129;GO:0051235;GO:0051492;GO:0051493;GO:0051494;GO:0051497;GO:…	GO:0003779;GO:0003785;GO:0005488;GO:0005515;GO:0008092	GO:0001725;GO:0005737;GO:0031941;GO:0032432;GO:0032991;GO:0042641;GO:0043234;GO:0044422;GO:0044424;GO:0044430;GO:0044446;GO:0044464
13.9957084655762	13.5903043746948	14.8325929641724	14.3162813186646	12.0865383148193	13.2341251373291	12.9724102020264	13.9833688735962	13.7062015533447	14.7205114364624	13.8349046707153	14.6663665771484	14.1950302124023	13.8960657119751	13.7524223327637	13.7076663970947	13.482780456543	13.9523849487305	14.8102703094482	15.0936326980591	13.6480140686035	14.2172555923462	14.8968057632446	14.9385004043579	14.9946565628052	15.1002101898193	14.3182392120361	13.1803932189941	13.7498121261597	14.9729347229004	14.6124076843262	14.1245975494385					biological regulation;cellular process;cellular response to stimulus;intracellular signal transduction;positive regulation of catalytic activity;positive regulation of GTPase activity;positive regulation of hydrolase activity;positive regulation of molecular function;regulation of biological process;regulation of catabolic process;regulation of catalytic activity;regulation of cellular catabolic …	binding;enzyme binding;enzyme regulator activity;GTPase binding;GTPase regulator activity;guanyl-nucleotide exchange factor activity;nucleoside-triphosphatase regulator activity;protein binding;Ras GTPase binding;Ras guanyl-nucleotide exchange factor activity;Rho GTPase binding;Rho guanyl-nucleotide exchange factor activity;small GTPase binding;small GTPase regulator activity		biological regulation;cellular process;response to stimulus;signal transduction			Ded_cyto;DOCK-C2;DUF3398;PH	AACTTT_UNKNOWN;ACAGGGT,MIR-10A,MIR-10B;ACAWYAAAG_UNKNOWN;BENPORATH_EED_TARGETS;CHEN_METABOLIC_SYNDROM_NETWORK;chrxq24;CREIGHTON_ENDOCRINE_THERAPY_RESISTANCE_3;CREIGHTON_ENDOCRINE_THERAPY_RESISTANCE_5;CTTTAAR_UNKNOWN;CTTTGA_V$LEF1_Q2;DUTERTRE_ESTRADIOL_RESPONSE_24HR_DN;FULCHER_INFLAMMATORY_RESPONSE_LECTIN_VS_LPS_DN;GAGACTG,MIR-452;GGGTGGRR_V$PAX4_03;GSE10094_LCMV_VS_LISTERIA_IND_EFF_CD4_TCELL_UP;G…	Completeproteome;Guanine-nucleotidereleasingfactor;Phosphoprotein;Referenceproteome		GO:0006140;GO:0007165;GO:0007264;GO:0009894;GO:0009987;GO:0019219;GO:0019222;GO:0030811;GO:0031323;GO:0031329;GO:0033121;GO:0033124;GO:0035556;GO:0043085;GO:0043087;GO:0043547;GO:0044093;GO:0050789;GO:0050790;GO:0050794;GO:0050896;GO:0051171;GO:0051336;GO:0051345;GO:0051716;GO:0065007;GO:0065009;GO:0080090	GO:0005083;GO:0005085;GO:0005088;GO:0005089;GO:0005488;GO:0005515;GO:0017016;GO:0017048;GO:0019899;GO:0030234;GO:0030695;GO:0031267;GO:0051020;GO:0060589
14.284951210022	12.6361036300659	13.7827930450439	13.3215055465698	14.1713361740112	13.8273916244507	12.8459796905518	13.9923505783081	13.8491249084473	14.2342939376831	13.273344039917	14.4347791671753	14.9972171783447	12.8002729415894	13.156120300293	13.5055656433105	13.3493719100952	13.7569732666016	14.2679567337036	14.89537525177	13.9829864501953	13.6106195449829	13.5851974487305	15.138521194458	13.3418636322021	14.1861143112183	15.1467981338501	13.5836801528931	14.2514886856079	13.4174566268921	13.1748304367065	13.9601392745972					biological regulation;positive regulation of biological process;positive regulation of cellular component organization;positive regulation of cellular process;positive regulation of synapse structural plasticity;regulation of biological process;regulation of cellular component organization;regulation of cellular process;regulation of synapse organization;regulation of synapse structural plasticity	binding;lipid binding;phosphatidylinositol binding;phosphatidylinositol-4,5-bisphosphate binding;phospholipid binding	cell part;cell projection;cell projection part;cytoskeleton;dendritic spine;intracellular non-membrane-bounded organelle;intracellular organelle;intracellular part;neuron projection;neuron spine;non-membrane-bounded organelle;organelle	biological regulation	cell part;cell projection;cytoskeleton;intracellular non-membrane-bounded organelle;intracellular organelle;neuron projection;organelle		FERM_M;PDZ	AAGCACA,MIR-218;AAGCCAT,MIR-135A,MIR-135B;ACEVEDO_LIVER_CANCER_WITH_H3K27ME3_DN;BENPORATH_EED_TARGETS;BENPORATH_ES_WITH_H3K27ME3;BENPORATH_PRC2_TARGETS;BENPORATH_SUZ12_TARGETS;BROWNE_HCMV_INFECTION_1HR_DN;BROWNE_HCMV_INFECTION_48HR_DN;chrxp22;CTCAAGA,MIR-526B;CTTTGCA,MIR-527;GAGCCTG,MIR-484;GSE1432_6H_VS_24H_IFNG_MICROGLIA_DN;GSE29614_CTRL_VS_DAY3_TIV_FLU_VACCINE_PBMC_DN;GSE360_L_MAJOR_VS_T_GONDI…	Alternativesplicing;Cellprojection;Completeproteome;Lipid-binding;Referenceproteome		GO:0048518;GO:0048522;GO:0050789;GO:0050794;GO:0050807;GO:0051128;GO:0051130;GO:0051823;GO:0051835;GO:0065007	GO:0005488;GO:0005543;GO:0005546;GO:0008289;GO:0035091	GO:0005856;GO:0042995;GO:0043005;GO:0043197;GO:0043226;GO:0043228;GO:0043229;GO:0043232;GO:0044309;GO:0044424;GO:0044463;GO:0044464
17.7346973419189	18.2584743499756	18.590763092041	18.1830635070801	18.2566318511963	18.5463829040527	18.3349456787109	18.5455532073975	18.1387119293213	18.2856369018555	18.6579113006592	18.4661483764648	18.8058071136475	18.5259647369385	18.6228160858154	18.5873241424561	18.1591129302979	18.7473411560059	18.448148727417	17.782958984375	18.9861526489258	18.6946239471436	18.6956081390381	18.3880176544189	18.2628383636475	18.3848171234131	18.5588397979736	16.9784641265869	18.0442562103271	18.7015438079834	18.5437030792236	18.6876010894775					cellular component organization;cellular component organization at cellular level;cellular component organization or biogenesis;cellular component organization or biogenesis at cellular level;cellular process;cytoskeleton organization;microtubule cytoskeleton organization;microtubule-based process;organelle organization	structural molecule activity	cell part;cytoplasm;cytoskeletal part;cytoskeleton;intracellular non-membrane-bounded organelle;intracellular organelle;intracellular organelle part;intracellular part;macromolecular complex;microtubule;microtubule cytoskeleton;non-membrane-bounded organelle;organelle;organelle part;protein complex	cellular component organization;cellular process;cytoskeleton organization;organelle organization	cell part;cytoplasm;cytoskeleton;intracellular non-membrane-bounded organelle;intracellular organelle;macromolecular complex;organelle;protein complex		MAP7	BENPORATH_EED_TARGETS;BENPORATH_SUZ12_TARGETS;BRUINS_UVC_RESPONSE_VIA_TP53_GROUP_A;FIGUEROA_AML_METHYLATION_CLUSTER_1_UP;FIGUEROA_AML_METHYLATION_CLUSTER_4_UP;FIGUEROA_AML_METHYLATION_CLUSTER_6_UP;GSE14769_UNSTIM_VS_20MIN_LPS_BMDM_UP;GSE18148_CBFB_KO_VS_WT_TREG_DN;GSE32423_IL7_VS_IL4_MEMORY_CD8_TCELL_DN;KINSEY_TARGETS_OF_EWSR1_FLII_FUSION_UP;LEE_BMP2_TARGETS_DN;LIAO_METASTASIS;MEISSNER_NPC_HCP_WI…	Alternativesplicing;Coiledcoil;Completeproteome;Referenceproteome		GO:0000226;GO:0006996;GO:0007010;GO:0007017;GO:0009987;GO:0016043;GO:0071840;GO:0071841;GO:0071842	GO:0005198	GO:0005737;GO:0005856;GO:0005874;GO:0015630;GO:0032991;GO:0043226;GO:0043228;GO:0043229;GO:0043232;GO:0043234;GO:0044422;GO:0044424;GO:0044430;GO:0044446;GO:0044464
14.0861759185791	13.9818515777588	12.6334619522095	14.0049514770508	14.4805345535278	14.1375751495361	13.8810091018677	14.0684385299683	13.7780714035034	13.1248588562012	13.9982233047485	14.1418333053589	14.3201103210449	13.7999954223633	14.2852020263672	13.760347366333	14.4038743972778	13.9387283325195	14.5916690826416	13.7462472915649	13.7582397460938	14.0405101776123	13.5816535949707	13.507345199585	13.0173234939575	13.549596786499	15.2850904464722	13.5874166488647	14.4390869140625	13.3832244873047	13.8529052734375	14.1498775482178					biological regulation;calcium ion homeostasis;calcium ion transmembrane transport;calcium ion transport;cation homeostasis;cation transport;cellular calcium ion homeostasis;cellular cation homeostasis;cellular chemical homeostasis;cellular component assembly;cellular component organization;cellular component organization or biogenesis;cellular divalent inorganic cation homeostasis;cellular homeos…	binding;calcium channel activity;calcium ion binding;calcium-release channel activity;cation binding;cation channel activity;cation transmembrane transporter activity;channel activity;gated channel activity;intracellular ligand-gated calcium channel activity;intracellular ligand-gated ion channel activity;ion binding;ion channel activity;ion transmembrane transporter activity;ligand-gated channel…	cell part;cytoplasmic part;endoplasmic reticulum membrane;endoplasmic reticulum part;integral to membrane;intracellular organelle part;intracellular part;intrinsic to membrane;junctional membrane complex;macromolecular complex;membrane;membrane part;organelle membrane;organelle part;protein complex;sarcoplasmic reticulum membrane	biological regulation;cellular component assembly;cellular component organization;cellular homeostasis;cellular ion homeostasis;cellular process;establishment of localization;homeostatic process;ion transport;macromolecular complex assembly;multicellular organismal process;muscle contraction;protein complex assembly;response to chemical stimulus;response to stimulus;transmembrane transport;transp…	cell part;macromolecular complex;membrane;protein complex		Ins145_P3_rec;Ion_trans;MIR;RIH_assoc;RR_TM4-6;RYDR_ITPR;RyR;SPRY	AACTTT_UNKNOWN;ACTGAAA,MIR-30A-3P,MIR-30E-3P;BENPORATH_EED_TARGETS;BENPORATH_ES_WITH_H3K27ME3;BENPORATH_NANOG_TARGETS;BENPORATH_PRC2_TARGETS;BENPORATH_SUZ12_TARGETS;BRUINS_UVC_RESPONSE_VIA_TP53_GROUP_B;CAGGTG_V$E12_Q6;CALCIUM_CHANNEL_ACTIVITY;CALCIUM_ION_TRANSPORT;CATION_CHANNEL_ACTIVITY;CATION_TRANSMEMBRANE_TRANSPORTER_ACTIVITY;CATION_TRANSPORT;chr15q14;CTATGCA,MIR-153;CTTTGT_V$LEF1_Q2;DAVICIONI…	Alternativesplicing;Calcium;Calciumchannel;Calciumtransport;Calmodulin-binding;Completeproteome;Endoplasmicreticulum;Ionchannel;Iontransport;Ligand-gatedionchannel;Membrane;Microsome;Receptor;Referenceproteome;Repeat;Sarcoplasmicreticulum;Transmembrane;Transmembranehelix;Transport		GO:0003008;GO:0003012;GO:0006461;GO:0006810;GO:0006811;GO:0006812;GO:0006816;GO:0006873;GO:0006874;GO:0006875;GO:0006936;GO:0006941;GO:0009987;GO:0010033;GO:0010035;GO:0010038;GO:0014070;GO:0014074;GO:0016043;GO:0019725;GO:0022607;GO:0030001;GO:0030003;GO:0031000;GO:0032026;GO:0032501;GO:0033198;GO:0034220;GO:0042221;GO:0042592;GO:0043279;GO:0043933;GO:0048878;GO:0050801;GO:0050896;GO:0051234;GO:…	GO:0005215;GO:0005216;GO:0005217;GO:0005218;GO:0005219;GO:0005261;GO:0005262;GO:0005488;GO:0005509;GO:0008324;GO:0015075;GO:0015267;GO:0015276;GO:0015278;GO:0022803;GO:0022834;GO:0022836;GO:0022838;GO:0022857;GO:0022891;GO:0022892;GO:0043167;GO:0043169;GO:0046872	GO:0005789;GO:0016020;GO:0016021;GO:0030314;GO:0031090;GO:0031224;GO:0032991;GO:0033017;GO:0043234;GO:0044422;GO:0044424;GO:0044425;GO:0044432;GO:0044444;GO:0044446;GO:0044464
17.6909809112549	18.1234340667725	17.3201656341553	16.684009552002	17.7224731445313	17.6907749176025	17.5591373443604	17.9337596893311	18.0832710266113	17.4731826782227	18.2885684967041	18.0975379943848	18.5945949554443	18.4931831359863	18.0938816070557	17.8839912414551	17.10133934021	18.1127853393555	18.3527679443359	18.8786144256592	17.7315845489502	18.5145683288574	18.1653575897217	18.3994541168213	18.3459854125977	17.8090152740479	18.8092021942139	17.7874298095703	18.6847629547119	18.2518329620361	18.0439891815186	18.3972396850586					cell cycle phase;cell cycle process;cell division;cellular component organization;cellular component organization at cellular level;cellular component organization or biogenesis;cellular component organization or biogenesis at cellular level;cellular process;centrosome organization;cytoskeleton organization;establishment of localization;establishment of RNA localization;establishment or maintenan…	binding;cytoskeletal protein binding;microtubule binding;protein binding;ribonucleoprotein binding;tubulin binding	cell part;centrosome;cytoplasm;cytoplasmic part;cytoskeletal part;intracellular non-membrane-bounded organelle;intracellular organelle;intracellular organelle part;intracellular part;macromolecular complex;membrane;microtubule organizing center;non-membrane-bounded organelle;organelle;organelle part;protein complex;spindle pole	cell division;cellular component organization;cellular process;cytoskeleton organization;establishment of localization;establishment or maintenance of cell polarity;microtubule organizing center organization;mitosis;nuclear division;nucleobase-containing compound transport;organelle fission;organelle organization;transport	cell part;centrosome;cytoplasm;intracellular non-membrane-bounded organelle;intracellular organelle;macromolecular complex;membrane;microtubule organizing center;organelle;protein complex		CLASP_N	BENPORATH_CYCLING_GENES;BIDUS_METASTASIS_UP;CAHOY_ASTROCYTIC;CAIRO_HEPATOBLASTOMA_CLASSES_UP;CELL_CYCLE_GO_0007049;CELL_CYCLE_PROCESS;CENTROSOME;CENTROSOME_ORGANIZATION_AND_BIOGENESIS;chr11p11;CUI_TCF21_TARGETS_2_UP;CYTOPLASM;CYTOPLASMIC_PART;CYTOSKELETAL_PART;CYTOSKELETON;CYTOSKELETON_ORGANIZATION_AND_BIOGENESIS;DACOSTA_UV_RESPONSE_VIA_ERCC3_COMMON_DN;DACOSTA_UV_RESPONSE_VIA_ERCC3_DN;DODD_NASOPH…	Acetylation;Alternativesplicing;Cellcycle;Celldivision;Completeproteome;Cytoplasm;Cytoskeleton;Mitosis;Phosphoprotein;Referenceproteome;Repeat		GO:0000226;GO:0000280;GO:0006810;GO:0006996;GO:0007010;GO:0007017;GO:0007051;GO:0007067;GO:0007163;GO:0009987;GO:0015931;GO:0016043;GO:0022402;GO:0022403;GO:0030951;GO:0030952;GO:0031023;GO:0048285;GO:0050657;GO:0050658;GO:0051234;GO:0051236;GO:0051297;GO:0051301;GO:0071840;GO:0071841;GO:0071842	GO:0005488;GO:0005515;GO:0008017;GO:0008092;GO:0015631;GO:0043021	GO:0000922;GO:0005737;GO:0005813;GO:0005815;GO:0016020;GO:0032991;GO:0043226;GO:0043228;GO:0043229;GO:0043232;GO:0043234;GO:0044422;GO:0044424;GO:0044430;GO:0044444;GO:0044446;GO:0044464
14.6555309295654	15.9468374252319	16.4651527404785	16.3175354003906	16.5071296691895	16.336576461792	16.387882232666	16.2820930480957	15.3559703826904	16.7154521942139	16.0446510314941	16.0640487670898	16.1369705200195	15.8649845123291	16.402795791626	16.2155513763428	15.9416666030884	16.2460536956787	16.5616607666016	16.1274299621582	16.3994617462158	16.0266971588135	16.0330352783203	16.2241153717041	15.5046949386597	16.581714630127	15.8381948471069	14.1984453201294	16.2683219909668	16.485279083252	15.9760274887085	16.1499843597412					biological regulation;cell projection organization;cellular component organization;cellular component organization at cellular level;cellular component organization or biogenesis;cellular component organization or biogenesis at cellular level;cellular process;cytoskeleton organization;neuron projection development;organelle organization;regulation of anatomical structure morphogenesis;regulation …	binding;calmodulin binding;cytoskeletal protein binding;microtubule binding;protein binding;spectrin binding;tubulin binding	cell part;cytoplasm;cytoskeletal part;intracellular organelle part;intracellular part;macromolecular complex;microtubule;organelle part;protein complex	biological regulation;cellular component organization;cellular process;cytoskeleton organization;organelle organization	cell part;cytoplasm;macromolecular complex;protein complex		CAMSAP_CH;CAMSAP_CKK	AMIT_EGF_RESPONSE_480_HELA;ATGGYGGA_UNKNOWN;BONOME_OVARIAN_CANCER_SURVIVAL_OPTIMAL_DEBULKING;BROWNE_HCMV_INFECTION_16HR_UP;CCAWNWWNNNGGC_UNKNOWN;CHANDRAN_METASTASIS_UP;chr9q34;CREIGHTON_ENDOCRINE_THERAPY_RESISTANCE_2;DAVICIONI_MOLECULAR_ARMS_VS_ERMS_UP;DODD_NASOPHARYNGEAL_CARCINOMA_UP;GRADE_COLON_AND_RECTAL_CANCER_UP;GSE14026_TH1_VS_TH17_UP;GSE17721_0.5H_VS_12H_CPG_BMDM_DN;GSE17721_0.5H_VS_12H_GA…	Alternativesplicing;Completeproteome;Cytoplasm;Cytoskeleton;Microtubule;Phosphoprotein;Referenceproteome		GO:0006996;GO:0007010;GO:0009987;GO:0016043;GO:0022603;GO:0022604;GO:0030030;GO:0031175;GO:0050789;GO:0050793;GO:0050794;GO:0051128;GO:0065007;GO:0071840;GO:0071841;GO:0071842	GO:0005488;GO:0005515;GO:0005516;GO:0008017;GO:0008092;GO:0015631;GO:0030507	GO:0005737;GO:0005874;GO:0032991;GO:0043234;GO:0044422;GO:0044424;GO:0044430;GO:0044446;GO:0044464
13.8472909927368	13.0361175537109	13.7666530609131	14.3151550292969	13.170337677002	13.5256986618042	13.2124614715576	13.2631731033325	13.9474639892578	14.814432144165	13.3918027877808	13.8172121047974	13.9632158279419	13.8634510040283	12.1824340820313	13.2929315567017	15.0513792037964	14.3257532119751	13.7934017181396	14.196475982666	13.7631120681763	13.1920595169067	13.4792079925537	15.0772171020508	13.7077474594116	14.950647354126	14.2903594970703	13.5341167449951	14.2008771896362	14.5278186798096	13.8574810028076	15.0197257995605							cell junction;cell part;cytoplasm;cytoskeletal part;cytoskeleton;intracellular non-membrane-bounded organelle;intracellular organelle;intracellular organelle part;intracellular part;membrane;non-membrane-bounded organelle;organelle;organelle part;postsynaptic density;postsynaptic membrane;synapse part;synaptic membrane		cell part;cytoplasm;cytoskeleton;intracellular non-membrane-bounded organelle;intracellular organelle;membrane;organelle				Alternativesplicing;Celljunction;Cellmembrane;Coiledcoil;Completeproteome;Cytoplasm;Cytoskeleton;Membrane;Postsynapticcellmembrane;Referenceproteome;Synapse				GO:0005737;GO:0005856;GO:0014069;GO:0016020;GO:0030054;GO:0043226;GO:0043228;GO:0043229;GO:0043232;GO:0044422;GO:0044424;GO:0044430;GO:0044446;GO:0044456;GO:0044464;GO:0045211;GO:0097060
14.102689743042	12.5064964294434	14.3828144073486	14.9071178436279	12.8364582061768	13.7868680953979	12.6494512557983	13.4210996627808	14.7891492843628	13.6542882919312	14.2974252700806	14.080979347229	13.3843946456909	14.4231948852539	13.9787578582764	13.8714046478271	13.4702663421631	14.2795839309692	13.6166677474976	14.4062767028809	13.9168825149536	13.2816944122314	13.0722589492798	15.6537532806396	14.0686540603638	13.1232318878174	14.771014213562	14.1862812042236	14.8197526931763	13.7048368453979	13.3443717956543	12.3733882904053					multicellular organismal process;neurological system process;sensory perception;sensory perception of mechanical stimulus;sensory perception of sound;system process		cell part;cell projection;intracellular part;microvillus;organelle part;stereocilium	multicellular organismal process;neurological system process	cell part;cell projection;microvillus		Phostensin;Phostensin_N	AKT_UP.V1_UP;AKT_UP_MTOR_DN.V1_UP;BILANGES_RAPAMYCIN_SENSITIVE_GENES;GSE10239_MEMORY_VS_DAY4.5_EFF_CD8_TCELL_UP;GSE10239_NAIVE_VS_MEMORY_CD8_TCELL_DN;GSE14350_IL2RB_KO_VS_WT_TREG_UP;GSE17721_0.5H_VS_12H_LPS_BMDM_UP;GSE17721_12H_VS_24H_LPS_BMDM_DN;GSE17721_CTRL_VS_LPS_24H_BMDM_UP;GSE17721_CTRL_VS_PAM3CSK4_8H_BMDM_UP;GSE17974_0H_VS_2H_IN_VITRO_ACT_CD4_TCELL_UP;GSE17974_CTRL_VS_ACT_IL4_AND_ANTI_IL12…	Cellprojection;Completeproteome;Hearing;Phosphoprotein;Referenceproteome		GO:0003008;GO:0007600;GO:0007605;GO:0032501;GO:0050877;GO:0050954		GO:0005902;GO:0032420;GO:0042995;GO:0044422;GO:0044424;GO:0044464
14.829291343689	14.3195419311523	14.5131597518921	12.6723737716675	14.0700492858887	12.9983205795288	14.8043804168701	14.2554340362549	13.8964223861694	14.3775949478149	14.3942155838013	13.5768547058105	14.1441822052002	13.036229133606	14.2865686416626	14.186206817627	13.122896194458	14.6583557128906	14.7058734893799	13.9508934020996	15.3009815216064	15.0832586288452	13.7609996795654	14.7709074020386	15.0486612319946	13.6622581481934	13.7100372314453	13.5371198654175	14.9909858703613	13.2853498458862	13.6089696884155	14.7081575393677					carbohydrate metabolic process;catabolic process;cellular carbohydrate metabolic process;cellular catabolic process;cellular macromolecule catabolic process;cellular macromolecule metabolic process;cellular metabolic process;cellular process;cellular protein metabolic process;ER-associated protein catabolic process;glycosylation;macromolecule catabolic process;macromolecule glycosylation;macromol…	binding;calcium ion binding;catalytic activity;cation binding;hydrolase activity;hydrolase activity, acting on glycosyl bonds;hydrolase activity, hydrolyzing O-glycosyl compounds;ion binding;mannosidase activity;mannosyl-oligosaccharide 1,2-alpha-mannosidase activity;mannosyl-oligosaccharide mannosidase activity;metal ion binding	cell part;cytoplasmic part;endoplasmic reticulum;endoplasmic reticulum membrane;endoplasmic reticulum part;integral to membrane;intracellular membrane-bounded organelle;intracellular organelle;intracellular organelle part;intracellular part;intrinsic to membrane;membrane;membrane part;membrane-bounded organelle;organelle;organelle membrane;organelle part;vesicle	carbohydrate metabolic process;catabolic process;cellular metabolic process;cellular process;macromolecule metabolic process;macromolecule modification;metabolic process;primary metabolic process;protein glycosylation;protein metabolic process;protein modification process;proteolysis;proteolysis involved in cellular protein catabolic process	cell part;endoplasmic reticulum;intracellular membrane-bounded organelle;intracellular organelle;membrane;organelle;vesicle	N-Glycan biosynthesis;Protein processing in endoplasmic reticulum;Various types of N-glycan biosynthesis	Glyco_hydro_47	BLALOCK_ALZHEIMERS_DISEASE_UP;CAIRO_HEPATOBLASTOMA_CLASSES_UP;CALCIUM_ION_BINDING;CARBOHYDRATE_METABOLIC_PROCESS;CATION_BINDING;CELL_FRACTION;chr9q34;CTCAGGG,MIR-125B,MIR-125A;CYTOPLASM;CYTOPLASMIC_PART;ENDOPLASMIC_RETICULUM;GGGCGGR_V$SP1_Q6;GSE11924_TFH_VS_TH17_CD4_TCELL_UP;GSE17721_CTRL_VS_CPG_24H_BMDM_UP;GSE17721_CTRL_VS_POLYIC_0.5H_BMDM_DN;GSE17721_LPS_VS_PAM3CSK4_2H_BMDM_DN;GSE17721_LPS_VS_P…	Calcium;Completeproteome;Disulfidebond;Endoplasmicreticulum;Glycosidase;Hydrolase;Membrane;Referenceproteome;Signal-anchor;Transmembrane;Transmembranehelix		GO:0005975;GO:0006464;GO:0006486;GO:0006508;GO:0006511;GO:0008152;GO:0009056;GO:0009057;GO:0009987;GO:0010498;GO:0019538;GO:0019941;GO:0030433;GO:0043161;GO:0043170;GO:0043412;GO:0043413;GO:0043632;GO:0044237;GO:0044238;GO:0044248;GO:0044260;GO:0044262;GO:0044265;GO:0044267;GO:0051603;GO:0070085	GO:0003824;GO:0004553;GO:0004571;GO:0005488;GO:0005509;GO:0015923;GO:0015924;GO:0016787;GO:0016798;GO:0043167;GO:0043169;GO:0046872	GO:0005783;GO:0005789;GO:0016020;GO:0016021;GO:0031090;GO:0031224;GO:0031982;GO:0043226;GO:0043227;GO:0043229;GO:0043231;GO:0044422;GO:0044424;GO:0044425;GO:0044432;GO:0044444;GO:0044446;GO:0044464
16.7650012969971	13.2417421340942	15.4915084838867	16.9681491851807	16.8437747955322	16.0456523895264	16.3111801147461	15.6922063827515	12.6159801483154	16.319637298584	14.1521911621094	15.0027713775635	14.3655338287354	15.5011739730835	16.0168304443359	15.6161184310913	16.316333770752	14.6983251571655	16.4841156005859	14.3635425567627	15.2748880386353	14.9257488250732	14.6488094329834	15.1498231887817	13.1048946380615	17.196044921875	14.9037885665894	16.8304653167725	16.0018482208252	12.8978595733643	14.7108936309814	13.6718654632568													Alternativesplicing;Completeproteome;Phosphoprotein;Referenceproteome
13.6200199127197	14.4845714569092	13.9118843078613	14.0525417327881	13.8903503417969	13.1911811828613	13.3727264404297	13.6268548965454	14.1985559463501	14.0026407241821	14.1320905685425	13.8503894805908	13.66845703125	12.9485931396484	14.1105813980103	13.8977718353271	12.7382612228394	13.66037940979	14.0339555740356	14.2471570968628	13.981427192688	14.473934173584	12.6446266174316	14.2638139724731	13.929536819458	14.2961349487305	14.0250186920166	13.9852886199951	14.1680135726929	15.0971794128418	14.993390083313	14.996768951416							cell part;integral to membrane;intrinsic to membrane;membrane part		cell part			BOYLAN_MULTIPLE_MYELOMA_D_DN;BOYLAN_MULTIPLE_MYELOMA_PCA3_DN;chr9q34;CHYLA_CBFA2T3_TARGETS_UP;CTTTGA_V$LEF1_Q2;DURAND_STROMA_MAX_DN;FOSTER_KDM1A_TARGETS_DN;GAUSSMANN_MLL_AF4_FUSION_TARGETS_F_UP;GGGCGGR_V$SP1_Q6;GOLDRATH_IMMUNE_MEMORY;GOLDRATH_NAIVE_VS_MEMORY_CD8_TCELL_DN;GSE13306_TREG_VS_TCONV_LAMINA_PROPRIA_DN;GSE14000_TRANSLATED_RNA_VS_MRNA_DC_DN;GSE17721_0.5H_VS_12H_GARDIQUIMOD_BMDM_UP;GSE1772…	Completeproteome;Membrane;Referenceproteome;Transmembrane;Transmembranehelix				GO:0016021;GO:0031224;GO:0044425;GO:0044464
16.4495525360107	16.837381362915	17.1913299560547	16.496244430542	16.3114471435547	17.4928703308105	17.0665512084961	17.134204864502	16.9671363830566	17.0432415008545	16.8844089508057	17.2769412994385	17.4865207672119	17.5508975982666	16.1769905090332	17.1581764221191	16.5257968902588	16.4923229217529	16.608470916748	16.9423770904541	17.9732608795166	17.5515727996826	17.5310764312744	17.3985767364502	17.1310939788818	17.098258972168	17.5409450531006	16.2550277709961	16.893087387085	17.0972290039063	17.0618133544922	17.8392276763916					cellular component organization;cellular component organization at cellular level;cellular component organization or biogenesis;cellular component organization or biogenesis at cellular level;cellular process;cytoskeleton organization;microtubule cytoskeleton organization;microtubule-based process;organelle organization	structural molecule activity	cell part;cytoplasm;cytoskeletal part;cytoskeleton;intracellular non-membrane-bounded organelle;intracellular organelle;intracellular organelle part;intracellular part;macromolecular complex;microtubule;microtubule cytoskeleton;non-membrane-bounded organelle;organelle;organelle part;protein complex;spindle	cellular component organization;cellular process;cytoskeleton organization;organelle organization	cell part;cytoplasm;cytoskeleton;intracellular non-membrane-bounded organelle;intracellular organelle;macromolecular complex;organelle;protein complex		MAP7	ATACTGT,MIR-144;BILD_HRAS_ONCOGENIC_SIGNATURE;CAGTGTT,MIR-141,MIR-200A;CHARAFE_BREAST_CANCER_LUMINAL_VS_MESENCHYMAL_DN;chr1p34;FORTSCHEGGER_PHF8_TARGETS_DN;GCACCTT,MIR-18A,MIR-18B;GRAESSMANN_APOPTOSIS_BY_DOXORUBICIN_UP;GSE10325_LUPUS_CD4_TCELL_VS_LUPUS_BCELL_UP;GSE10325_MYELOID_VS_LUPUS_MYELOID_DN;GSE13485_CTRL_VS_DAY21_YF17D_VACCINE_PBMC_UP;GSE14308_TH2_VS_TH1_DN;GSE14350_TREG_VS_TEFF_IN_IL2RB_K…	Alternativesplicing;Coiledcoil;Completeproteome;Cytoplasm;Cytoskeleton;Isopeptidebond;Phosphoprotein;Referenceproteome;Ublconjugation		GO:0000226;GO:0006996;GO:0007010;GO:0007017;GO:0009987;GO:0016043;GO:0071840;GO:0071841;GO:0071842	GO:0005198	GO:0005737;GO:0005819;GO:0005856;GO:0005874;GO:0015630;GO:0032991;GO:0043226;GO:0043228;GO:0043229;GO:0043232;GO:0043234;GO:0044422;GO:0044424;GO:0044430;GO:0044446;GO:0044464
13.9348697662354	13.7246131896973	14.0480451583862	14.3260049819946	13.6607990264893	13.0814962387085	14.4518489837646	13.0018692016602	13.8432455062866	14.8949899673462	14.7643575668335	13.2730741500854	13.4467945098877	13.0313453674316	13.838038444519	12.9339323043823	13.7120904922485	13.8780879974365	13.4810209274292	14.922477722168	14.9824571609497	13.9716520309448	13.8440389633179	13.955530166626	14.8200922012329	12.5669555664063	13.6035385131836	13.7222537994385	14.6092185974121	13.2960329055786	13.7495889663696	14.2986116409302					biological regulation;cellular macromolecule metabolic process;cellular metabolic process;cellular process;cellular protein metabolic process;dephosphorylation;macromolecule metabolic process;macromolecule modification;metabolic process;negative regulation of biological process;negative regulation of catabolic process;negative regulation of cell cycle;negative regulation of cellular catabolic pro…	ATPase binding;binding;catalytic activity;channel regulator activity;enzyme binding;hydrolase activity;hydrolase activity, acting on ester bonds;phosphatase activity;phosphoprotein binding;phosphoprotein phosphatase activity;phosphoric ester hydrolase activity;phosphotyrosine binding;protein binding;protein phosphorylated amino acid binding;protein tyrosine phosphatase activity;sodium channel reg…	cell part;cytoplasm;cytoskeleton;internal side of plasma membrane;intracellular non-membrane-bounded organelle;intracellular organelle;intracellular part;membrane part;non-membrane-bounded organelle;organelle;plasma membrane part	biological regulation;cellular metabolic process;cellular process;macromolecule metabolic process;macromolecule modification;metabolic process;phosphorus metabolic process;primary metabolic process;protein dephosphorylation;protein metabolic process;protein modification process;regulation of cell cycle;regulation of mitotic cell cycle;regulation of transport	cell part;cytoplasm;cytoskeleton;intracellular non-membrane-bounded organelle;intracellular organelle;organelle		FERM_C;FERM_M;FERM_N;PDZ;Y_phosphatase	ACEVEDO_METHYLATED_IN_LIVER_CANCER_DN;ACTGTGA,MIR-27A,MIR-27B;AKL_HTLV1_INFECTION_DN;ATGTTAA,MIR-302C;BANDRES_RESPONSE_TO_CARMUSTIN_MGMT_48HR_DN;BENPORATH_SOX2_TARGETS;BIOPOLYMER_METABOLIC_PROCESS;BIOPOLYMER_MODIFICATION;BONCI_TARGETS_OF_MIR15A_AND_MIR16_1;BOSCO_EPITHELIAL_DIFFERENTIATION_MODULE;BROWNE_HCMV_INFECTION_18HR_UP;CATTTCA,MIR-203;CELLULAR_MACROMOLECULE_METABOLIC_PROCESS;CELLULAR_PROTEI…	Cellmembrane;Completeproteome;Cytoplasm;Cytoskeleton;Hydrolase;Membrane;Phosphoprotein;Proteinphosphatase;Referenceproteome		GO:0002028;GO:0006464;GO:0006470;GO:0006793;GO:0006796;GO:0007346;GO:0008152;GO:0009892;GO:0009894;GO:0009895;GO:0009987;GO:0010605;GO:0010959;GO:0016311;GO:0019222;GO:0019538;GO:0022898;GO:0030162;GO:0031323;GO:0031324;GO:0031329;GO:0031330;GO:0032268;GO:0032269;GO:0032409;GO:0032412;GO:0032879;GO:0034762;GO:0034765;GO:0035335;GO:0042176;GO:0042177;GO:0043170;GO:0043269;GO:0043412;GO:0044237;GO:…	GO:0001784;GO:0003824;GO:0004721;GO:0004725;GO:0005488;GO:0005515;GO:0016247;GO:0016787;GO:0016788;GO:0016791;GO:0017080;GO:0019899;GO:0042578;GO:0045309;GO:0051117;GO:0051219	GO:0005737;GO:0005856;GO:0009898;GO:0043226;GO:0043228;GO:0043229;GO:0043232;GO:0044424;GO:0044425;GO:0044459;GO:0044464
17.4423274993896	17.3628177642822	18.0973834991455	17.5929527282715	18.0874729156494	18.1309432983398	18.184419631958	17.7280006408691	16.6831874847412	18.2557563781738	17.6968994140625	17.6233520507813	17.3881855010986	17.4871482849121	17.8212757110596	17.8592681884766	17.7476024627686	17.9170684814453	18.514066696167	18.1388626098633	17.795316696167	17.9432353973389	17.8392276763916	17.525505065918	17.2643508911133	17.9458103179932	17.9415168762207	17.2101955413818	17.4854984283447	17.4731025695801	17.0772323608398	17.6662940979004					biological regulation;positive regulation of catalytic activity;positive regulation of GTPase activity;positive regulation of hydrolase activity;positive regulation of molecular function;regulation of biological process;regulation of catabolic process;regulation of catalytic activity;regulation of cellular catabolic process;regulation of cellular metabolic process;regulation of cellular process;r…	binding;enzyme activator activity;enzyme binding;enzyme regulator activity;GTPase activator activity;GTPase binding;GTPase regulator activity;identical protein binding;nucleoside-triphosphatase regulator activity;protein binding;protein dimerization activity;protein homodimerization activity;Ras GTPase binding;small GTPase binding	cell part;cytoplasmic part;cytosol;Golgi apparatus part;Golgi membrane;intracellular organelle part;intracellular part;membrane;organelle membrane;organelle part	biological regulation	cell part;cytosol;membrane		GoLoco;Rap_GAP	ACEVEDO_LIVER_CANCER_DN;ACEVEDO_LIVER_TUMOR_VS_NORMAL_ADJACENT_TISSUE_DN;ALFANO_MYC_TARGETS;BASAKI_YBX1_TARGETS_DN;BERNARD_PPAPDC1B_TARGETS_DN;CELL_FRACTION;chr1p36;CYTOPLASM;CYTOPLASMIC_PART;CYTOSOL;DURCHDEWALD_SKIN_CARCINOGENESIS_DN;ENK_UV_RESPONSE_EPIDERMIS_UP;ENZYME_ACTIVATOR_ACTIVITY;ENZYME_REGULATOR_ACTIVITY;FRASOR_RESPONSE_TO_ESTRADIOL_DN;GEORGES_CELL_CYCLE_MIR192_TARGETS;GEORGES_TARGETS_O…	Alternativesplicing;Completeproteome;Golgiapparatus;GTPaseactivation;Membrane;Phosphoprotein;Referenceproteome		GO:0006140;GO:0009894;GO:0019219;GO:0019222;GO:0030811;GO:0031323;GO:0031329;GO:0033121;GO:0033124;GO:0043085;GO:0043087;GO:0043547;GO:0044093;GO:0050789;GO:0050790;GO:0050794;GO:0051171;GO:0051336;GO:0051345;GO:0065007;GO:0065009;GO:0080090	GO:0005096;GO:0005488;GO:0005515;GO:0008047;GO:0017016;GO:0019899;GO:0030234;GO:0030695;GO:0031267;GO:0042802;GO:0042803;GO:0046983;GO:0051020;GO:0060589	GO:0000139;GO:0005829;GO:0016020;GO:0031090;GO:0044422;GO:0044424;GO:0044431;GO:0044444;GO:0044446;GO:0044464
15.4959802627563	15.8582963943481	15.5132961273193	15.4367437362671	15.9186067581177	16.0228881835938	15.4637479782104	15.6625289916992	15.7405452728271	16.0414237976074	14.8421049118042	15.6706838607788	15.2517786026001	15.7512559890747	15.9566707611084	15.9249286651611	15.9248123168945	15.5394010543823	16.0838527679443	15.7660627365112	15.2721557617188	15.9225845336914	16.5950393676758	15.2412757873535	15.3800554275513	16.3102397918701	16.6036109924316	16.2917098999023	15.2335071563721	15.644082069397	15.2669324874878	15.9149694442749					anatomical structure development;anatomical structure morphogenesis;apical protein localization;asymmetric protein localization;biological regulation;brain development;camera-type eye development;camera-type eye morphogenesis;cell junction maintenance;cell junction organization;cell migration;cell motility;cell-cell junction maintenance;cell-cell junction organization;cellular component maintenan…	actin binding;actin filament binding;beta-catenin binding;binding;cytoskeletal protein binding;protein binding;protein domain specific binding	adherens junction;anchoring junction;apical junction complex;apical plasma membrane;cell body;cell cortex;cell junction;cell part;cell-cell adherens junction;cell-cell junction;cytoplasm;cytoplasmic part;cytoskeletal part;cytoskeleton;extracellular membrane-bounded organelle;extracellular organelle;extracellular region part;extracellular vesicular exosome;intracellular non-membrane-bounded organe…	anatomical structure development;anatomical structure morphogenesis;biological regulation;cell junction organization;cell motility;cellular component movement;cellular component organization;cellular process;developmental process;establishment of localization;localization;locomotion;organelle organization;pigment granule organization;pigmentation;regulation of organelle organization;response to e…	cell body;cell cortex;cell part;cytoplasm;cytoskeleton;extracellular organelle;intracellular non-membrane-bounded organelle;intracellular organelle;macromolecular complex;membrane;neuronal cell body;organelle;plasma membrane;protein complex;vesicle		ASD1;ASD2;PDZ	AAGCAAT,MIR-137;ACCAAAG,MIR-9;ACTIN_BINDING;ACTIN_CYTOSKELETON;ACTIN_CYTOSKELETON_ORGANIZATION_AND_BIOGENESIS;ACTIN_FILAMENT_BASED_PROCESS;ACTIN_FILAMENT_BINDING;ACTIN_FILAMENT_BUNDLE_FORMATION;ACTIN_FILAMENT_ORGANIZATION;ADHERENS_JUNCTION;ANATOMICAL_STRUCTURE_DEVELOPMENT;ANATOMICAL_STRUCTURE_MORPHOGENESIS;APICAL_JUNCTION_COMPLEX;APICAL_PART_OF_CELL;APICAL_PLASMA_MEMBRANE;APICOLATERAL_PLASMA_MEMB…	Actin-binding;Alternativesplicing;Celljunction;Cellmembrane;Completeproteome;Cytoplasm;Cytoskeleton;Developmentalprotein;Membrane;Microtubule;Phosphoprotein;Referenceproteome;Tightjunction		GO:0001654;GO:0002089;GO:0006928;GO:0006996;GO:0007420;GO:0007423;GO:0008057;GO:0008064;GO:0008104;GO:0008105;GO:0009605;GO:0009653;GO:0009887;GO:0009987;GO:0010639;GO:0016043;GO:0016050;GO:0016477;GO:0030832;GO:0030834;GO:0030835;GO:0032401;GO:0032438;GO:0032502;GO:0032535;GO:0032956;GO:0032970;GO:0033036;GO:0033043;GO:0033059;GO:0034330;GO:0034331;GO:0040011;GO:0043010;GO:0043242;GO:0043244;GO:…	GO:0003779;GO:0005488;GO:0005515;GO:0008013;GO:0008092;GO:0019904;GO:0051015	GO:0005737;GO:0005856;GO:0005874;GO:0005886;GO:0005911;GO:0005912;GO:0005913;GO:0005923;GO:0005938;GO:0016020;GO:0016324;GO:0030054;GO:0031982;GO:0031988;GO:0032991;GO:0043025;GO:0043226;GO:0043227;GO:0043228;GO:0043229;GO:0043230;GO:0043232;GO:0043234;GO:0043296;GO:0044297;GO:0044421;GO:0044422;GO:0044424;GO:0044425;GO:0044430;GO:0044444;GO:0044446;GO:0044459;GO:0044464;GO:0065010;GO:0070062;GO:…
14.0509357452393	13.3624629974365	13.1015768051147	13.5660409927368	13.4758520126343	13.3545618057251	13.7222948074341	13.2009992599487	14.3629627227783	14.3220710754395	14.7461423873901	14.7013101577759	13.3157176971436	12.6581106185913	14.2642889022827	13.5122117996216	13.7063770294189	13.984185218811	13.3313436508179	15.025297164917	14.2889852523804	14.5692558288574	13.4529027938843	13.9615964889526	13.5641088485718	13.4125728607178	13.0951156616211	13.9598970413208	13.6063375473022	13.4895725250244	14.4437770843506	13.7210493087769					cellular component organization;cellular component organization at cellular level;cellular component organization or biogenesis;cellular component organization or biogenesis at cellular level;cellular localization;cellular macromolecule localization;cellular process;cellular protein localization;centriole-centriole cohesion;centrosome organization;localization;macromolecule localization;microtubu…	binding;binding, bridging;enzyme binding;kinase binding;protein binding;protein binding, bridging;protein domain specific binding;protein kinase binding	cell part;centriole;cytoplasm;cytoplasmic part;cytoskeletal part;extracellular membrane-bounded organelle;extracellular organelle;extracellular region part;extracellular vesicular exosome;intracellular non-membrane-bounded organelle;intracellular organelle;intracellular organelle part;intracellular part;membrane-bounded organelle;membrane-bounded vesicle;microtubule organizing center part;non-mem…	cellular component organization;cellular localization;cellular process;localization;microtubule organizing center organization;organelle organization	cell part;cytoplasm;extracellular organelle;intracellular non-membrane-bounded organelle;intracellular organelle;organelle;vesicle			AAAYRNCTG_UNKNOWN;CAGGTG_V$E12_Q6;CHANDRAN_METASTASIS_UP;chr9p22;CTTTAAR_UNKNOWN;CTTTGA_V$LEF1_Q2;CTTTGT_V$LEF1_Q2;DCA_UP.V1_DN;GRAESSMANN_APOPTOSIS_BY_DOXORUBICIN_DN;GSE13411_NAIVE_VS_SWITCHED_MEMORY_BCELL_UP;GSE14000_UNSTIM_VS_16H_LPS_DC_TRANSLATED_RNA_DN;GSE14000_UNSTIM_VS_4H_LPS_DC_DN;GSE14308_INDUCED_VS_NATURAL_TREG_DN;GSE14308_TH1_VS_INDUCED_TREG_UP;GSE14308_TH17_VS_NATURAL_TREG_DN;GSE1460_…	Acetylation;Alternativesplicing;Coiledcoil;Completeproteome;Cytoplasm;Cytoskeleton;Phosphoprotein;Referenceproteome		GO:0006996;GO:0008104;GO:0009987;GO:0010457;GO:0016043;GO:0031023;GO:0033036;GO:0033365;GO:0034613;GO:0051179;GO:0051297;GO:0051641;GO:0070727;GO:0071840;GO:0071841;GO:0071842	GO:0005488;GO:0005515;GO:0019899;GO:0019900;GO:0019901;GO:0019904;GO:0030674;GO:0060090	GO:0005737;GO:0005814;GO:0031982;GO:0031988;GO:0043226;GO:0043227;GO:0043228;GO:0043229;GO:0043230;GO:0043232;GO:0044421;GO:0044422;GO:0044424;GO:0044430;GO:0044444;GO:0044446;GO:0044450;GO:0044464;GO:0065010;GO:0070062
16.4459362030029	16.9337596893311	17.3231601715088	17.2605895996094	17.1193866729736	17.4829025268555	17.0756664276123	16.965784072876	17.1163444519043	17.5385990142822	16.969612121582	17.0105056762695	17.1622142791748	17.227409362793	17.0105056762695	16.9403133392334	16.3350238800049	17.0252914428711	17.0808792114258	17.3854923248291	17.3973236083984	17.1776733398438	17.4019966125488	17.2235488891602	16.8678569793701	17.4926357269287	17.3228092193604	16.0952739715576	16.887149810791	17.3629875183105	17.1609344482422	17.0263729095459					cellular macromolecule metabolic process;cellular metabolic process;cellular process;cellular protein metabolic process;macromolecule metabolic process;macromolecule modification;metabolic process;primary metabolic process;protein metabolic process;protein modification by small protein conjugation;protein modification by small protein conjugation or removal;protein modification process;protein ub…	acid-amino acid ligase activity;binding;catalytic activity;cation binding;ion binding;ligase activity;ligase activity, forming carbon-nitrogen bonds;metal ion binding;small conjugating protein ligase activity;transition metal ion binding;ubiquitin-protein ligase activity;zinc ion binding	cell part;centrosome;cytoplasm;cytoplasmic part;cytoskeletal part;integral to membrane;intracellular non-membrane-bounded organelle;intracellular organelle;intracellular organelle part;intracellular part;intrinsic to membrane;membrane;membrane part;microtubule organizing center;non-membrane-bounded organelle;nuclear part;nucleoplasm;organelle;organelle part	cellular metabolic process;cellular process;macromolecule metabolic process;macromolecule modification;metabolic process;primary metabolic process;protein metabolic process;protein modification by small protein conjugation or removal;protein modification process	cell part;centrosome;cytoplasm;intracellular non-membrane-bounded organelle;intracellular organelle;membrane;microtubule organizing center;nucleoplasm;organelle		E3_UbLigase_R4;zf-UBR	AACTTT_UNKNOWN;CACGTG_V$MYC_Q2;CAFFAREL_RESPONSE_TO_THC_24HR_5_DN;CAFFAREL_RESPONSE_TO_THC_UP;chr1p36;CONCANNON_APOPTOSIS_BY_EPOXOMICIN_UP;CTTTAAR_UNKNOWN;FULCHER_INFLAMMATORY_RESPONSE_LECTIN_VS_LPS_UP;GAL_LEUKEMIC_STEM_CELL_UP;GGGAGGRR_V$MAZ_Q6;GGGYGTGNY_UNKNOWN;GOLDRATH_NAIVE_VS_EFF_CD8_TCELL_UP;GRADE_COLON_AND_RECTAL_CANCER_UP;GRADE_COLON_CANCER_UP;GSE11057_EFF_MEM_VS_CENT_MEM_CD4_TCELL_DN;GSE…	Acetylation;Alternativesplicing;Calmodulin-binding;Completeproteome;Cytoplasm;Cytoskeleton;Ligase;Membrane;Metal-binding;Nucleus;Phosphoprotein;Referenceproteome;Transmembrane;Transmembranehelix;Ublconjugationpathway;Zinc;Zinc-finger		GO:0006464;GO:0008152;GO:0009987;GO:0016567;GO:0019538;GO:0032446;GO:0042787;GO:0043170;GO:0043412;GO:0044237;GO:0044238;GO:0044260;GO:0044267;GO:0070647	GO:0003824;GO:0004842;GO:0005488;GO:0008270;GO:0016874;GO:0016879;GO:0016881;GO:0019787;GO:0043167;GO:0043169;GO:0046872;GO:0046914	GO:0005654;GO:0005737;GO:0005813;GO:0005815;GO:0016020;GO:0016021;GO:0031224;GO:0043226;GO:0043228;GO:0043229;GO:0043232;GO:0044422;GO:0044424;GO:0044425;GO:0044428;GO:0044430;GO:0044444;GO:0044446;GO:0044464
13.5840644836426	13.3175134658813	14.1663198471069	14.6740818023682	13.1090097427368	14.5178537368774	13.3016338348389	13.477876663208	13.6725721359253	14.5832004547119	13.7090740203857	12.5021352767944	14.4987564086914	15.069522857666	14.2146987915039	13.4863986968994	14.9262495040894	15.3595609664917	14.0823030471802	14.1420946121216	14.3356695175171	14.1533145904541	14.7403078079224	14.0270195007324	14.0664463043213	14.5908212661743	14.170823097229	13.4463710784912	12.898998260498	14.128155708313	13.9974718093872	13.5880117416382					biological regulation;catabolic process;cellular lipid metabolic process;cellular metabolic process;cellular process;cellular response to stimulus;glycerolipid metabolic process;glycerophospholipid metabolic process;intracellular signal transduction;lipid catabolic process;lipid metabolic process;metabolic process;organophosphate metabolic process;phosphatidylinositol metabolic process;phospholip…	binding;calcium ion binding;catalytic activity;cation binding;hydrolase activity;hydrolase activity, acting on ester bonds;ion binding;lipase activity;metal ion binding;molecular transducer activity;phosphatidylinositol phospholipase C activity;phospholipase activity;phospholipase C activity;phosphoric diester hydrolase activity;phosphoric ester hydrolase activity;signal transducer activity	cell part;cytoplasm;intracellular part;membrane;plasma membrane	biological regulation;catabolic process;cellular lipid metabolic process;cellular metabolic process;cellular process;lipid metabolic process;metabolic process;primary metabolic process;response to stimulus;signal transduction	cell part;cytoplasm;membrane;plasma membrane		C2;EF-hand_7;EF-hand_like;PI-PLC-X;PI-PLC-Y	ACEVEDO_METHYLATED_IN_LIVER_CANCER_DN;chr1p36;GSE1432_CTRL_VS_IFNG_1H_MICROGLIA_DN;GSE1460_INTRATHYMIC_T_PROGENITOR_VS_DP_THYMOCYTE_DN;GSE22886_NAIVE_CD4_TCELL_VS_12H_ACT_TH1_UP;GSE27786_CD4_TCELL_VS_NKTCELL_DN;GSE27786_LSK_VS_ERYTHROBLAST_DN;GSE27786_NKCELL_VS_ERYTHROBLAST_DN;GSE29615_CTRL_VS_DAY7_LAIV_FLU_VACCINE_PBMC_UP;GSE29615_CTRL_VS_LAIV_FLU_VACCINE_PBMC_UP;GSE30083_SP2_VS_SP4_THYMOCYTE_UP…	Alternativesplicing;Calcium;Cellmembrane;Completeproteome;Cytoplasm;Hydrolase;Lipiddegradation;Lipidmetabolism;Membrane;Metal-binding;Phosphoprotein;Referenceproteome;Repeat;Transducer		GO:0006629;GO:0006644;GO:0006650;GO:0007165;GO:0008152;GO:0009056;GO:0009987;GO:0016042;GO:0019637;GO:0035556;GO:0044237;GO:0044238;GO:0044255;GO:0046486;GO:0046488;GO:0050789;GO:0050794;GO:0050896;GO:0051716;GO:0065007	GO:0003824;GO:0004435;GO:0004620;GO:0004629;GO:0004871;GO:0005488;GO:0005509;GO:0008081;GO:0016298;GO:0016787;GO:0016788;GO:0042578;GO:0043167;GO:0043169;GO:0046872;GO:0060089	GO:0005737;GO:0005886;GO:0016020;GO:0044424;GO:0044464
14.0896596908569	13.4544830322266	13.3832769393921	12.9381608963013	14.2865648269653	13.5046682357788	14.6078329086304	14.2391061782837	13.5267658233643	13.0613765716553	14.1782178878784	14.0866804122925	14.0784788131714	14.0307388305664	14.2712430953979	13.75403881073	13.414342880249	14.2220792770386	14.6563758850098	15.0067758560181	13.2640514373779	16.2774887084961	13.8162040710449	13.8636856079102	13.4212999343872	14.7380094528198	14.8587560653687	14.2402772903442	13.6029558181763	14.1004447937012	13.6302509307861	13.6073751449585					activation of protein kinase activity;apoptosis;biological regulation;cell cycle phase;cell cycle process;cell death;cell division;cellular component assembly;cellular component assembly at cellular level;cellular component organization;cellular component organization at cellular level;cellular component organization or biogenesis;cellular component organization or biogenesis at cellular level;ce…	binding;enzyme binding;kinase binding;protein binding;protein kinase binding	aster;axon hillock;axon part;cell part;cell projection part;cytoplasm;cytoskeletal part;cytoskeleton;intracellular membrane-bounded organelle;intracellular non-membrane-bounded organelle;intracellular organelle;intracellular organelle part;intracellular part;macromolecular complex;membrane-bounded organelle;microtubule;microtubule cytoskeleton;non-membrane-bounded organelle;nuclear part;nucleopla…	biological regulation;cell death;cell division;cellular component assembly;cellular component organization;cellular process;cytoskeleton organization;death;mitosis;nuclear division;organelle assembly;organelle fission;organelle organization;regulation of cell cycle;regulation of mitotic cell cycle;regulation of organelle organization;regulation of protein modification process	cell part;cytoplasm;cytoskeleton;intracellular membrane-bounded organelle;intracellular non-membrane-bounded organelle;intracellular organelle;macromolecular complex;nucleoplasm;nucleus;organelle;protein complex		Aurora-A_bind;TPX2;TPX2_importin	ADENYL_NUCLEOTIDE_BINDING;ADENYL_RIBONUCLEOTIDE_BINDING;ALCALAY_AML_BY_NPM1_LOCALIZATION_DN;ATP_BINDING;BASAKI_YBX1_TARGETS_UP;BASSO_B_LYMPHOCYTE_NETWORK;BENPORATH_CYCLING_GENES;BENPORATH_NANOG_TARGETS;BHATTACHARYA_EMBRYONIC_STEM_CELL;BIDUS_METASTASIS_UP;BIOCARTA_RANMS_PATHWAY;BLUM_RESPONSE_TO_SALIRASIB_DN;BOQUEST_STEM_CELL_CULTURED_VS_FRESH_UP;BORCZUK_MALIGNANT_MESOTHELIOMA_UP;BROWNE_HCMV_INFECT…	Acetylation;Apoptosis;Cellcycle;Celldivision;Completeproteome;Cytoplasm;Cytoskeleton;Microtubule;Mitosis;Nucleus;Phosphoprotein;Referenceproteome		GO:0000226;GO:0000280;GO:0001932;GO:0006915;GO:0006996;GO:0007010;GO:0007017;GO:0007051;GO:0007067;GO:0007346;GO:0008219;GO:0009987;GO:0010564;GO:0012501;GO:0016043;GO:0016265;GO:0019220;GO:0019222;GO:0022402;GO:0022403;GO:0022607;GO:0031323;GO:0031399;GO:0032147;GO:0032268;GO:0032886;GO:0033043;GO:0033674;GO:0042325;GO:0043085;GO:0043549;GO:0044093;GO:0045859;GO:0045860;GO:0048285;GO:0050789;GO:…	GO:0005488;GO:0005515;GO:0019899;GO:0019900;GO:0019901	GO:0000922;GO:0005634;GO:0005654;GO:0005737;GO:0005818;GO:0005819;GO:0005856;GO:0005874;GO:0015630;GO:0032991;GO:0033267;GO:0043203;GO:0043226;GO:0043227;GO:0043228;GO:0043229;GO:0043231;GO:0043232;GO:0043234;GO:0044422;GO:0044424;GO:0044428;GO:0044430;GO:0044446;GO:0044463;GO:0044464
17.7798862457275	17.9676990509033	17.5561466217041	17.1000061035156	17.8039798736572	17.547887802124	17.5638370513916	17.7023220062256	17.2578296661377	17.4147682189941	18.1781101226807	18.0947074890137	18.2945041656494	18.2565402984619	17.657039642334	17.4301261901855	17.3959865570068	17.8784332275391	17.1797142028809	18.5650272369385	17.7975978851318	17.9886512756348	18.0745697021484	18.1671237945557	17.8858985900879	17.2198677062988	18.3736896514893	17.9166030883789	17.9212589263916	17.9914226531982	18.1793251037598	18.1370105743408					actin cytoskeleton organization;actin filament-based process;biological regulation;cell migration;cell motility;cellular component movement;cellular component organization;cellular component organization at cellular level;cellular component organization or biogenesis;cellular component organization or biogenesis at cellular level;cellular process;cortical actin cytoskeleton organization;cortical …	binding;GTPase activating protein binding;protein binding	cell part;cytoplasm;intracellular part	biological regulation;cell motility;cellular component movement;cellular component organization;cellular process;cytoskeleton organization;locomotion;organelle organization	cell part;cytoplasm		Drf_FH3;Drf_GBD;FH2	AAAYRNCTG_UNKNOWN;AACGGTT,MIR-451;AAGCAAT,MIR-137;ACACTAC,MIR-142-3P;ACEVEDO_FGFR1_TARGETS_IN_PROSTATE_CANCER_MODEL_UP;AGGCACT,MIR-515-3P;ATGTACA,MIR-493;CATTTCA,MIR-203;CHARAFE_BREAST_CANCER_LUMINAL_VS_BASAL_DN;CHARAFE_BREAST_CANCER_LUMINAL_VS_MESENCHYMAL_DN;CHEN_METABOLIC_SYNDROM_NETWORK;CHIANG_LIVER_CANCER_SUBCLASS_PROLIFERATION_UP;chr12q13;chr2q23;CLAUS_PGR_POSITIVE_MENINGIOMA_DN;COLINA_TARGE…	3D-structure;Alternativesplicing;Completeproteome;Cytoplasm;Lipoprotein;Myristate;Phosphoprotein;Referenceproteome		GO:0006928;GO:0006996;GO:0007010;GO:0008360;GO:0009987;GO:0016043;GO:0016477;GO:0022603;GO:0022604;GO:0030029;GO:0030036;GO:0030865;GO:0030866;GO:0040011;GO:0048870;GO:0050789;GO:0050793;GO:0050794;GO:0051128;GO:0065007;GO:0065008;GO:0071840;GO:0071841;GO:0071842	GO:0005488;GO:0005515;GO:0032794	GO:0005737;GO:0044424;GO:0044464
14.8739728927612	15.6552228927612	16.0481243133545	14.9830379486084	15.9291429519653	15.4298973083496	16.5080413818359	14.2372817993164	15.8211011886597	16.605899810791	14.2465524673462	16.4485359191895	14.3566608428955	16.7742977142334	16.2187328338623	16.2351360321045	15.7469863891602	15.7797708511353	16.2813682556152	16.1786460876465	15.9296283721924	15.1899013519287	16.6308364868164	15.8897180557251	15.9668436050415	16.3825225830078	15.4534959793091	12.8067188262939	13.620626449585	16.2516117095947	15.5484008789063	16.1203193664551					adult behavior;adult locomotory behavior;adult walking behavior;behavior;biological regulation;cation transport;cellular chemical homeostasis;cellular homeostasis;cellular ion homeostasis;cellular process;chemical homeostasis;establishment of localization;homeostatic process;ion homeostasis;ion transmembrane transport;ion transport;locomotory behavior;metal ion transport;monovalent inorganic cati…	cation channel activity;cation transmembrane transporter activity;channel activity;gated channel activity;ion channel activity;ion transmembrane transporter activity;passive transmembrane transporter activity;sodium channel activity;substrate-specific channel activity;substrate-specific transmembrane transporter activity;substrate-specific transporter activity;transmembrane transporter activity;t…	axon;axon part;cation channel complex;cell body;cell junction;cell part;cell projection;cell projection part;cell-cell contact zone;cell-cell junction;initial segment;intercalated disc;ion channel complex;macromolecular complex;membrane;membrane part;neuron projection;neuronal cell body;node of Ranvier;plasma membrane part;protein complex;sodium channel complex;T-tubule;voltage-gated sodium chann…	behavior;biological regulation;cellular homeostasis;cellular ion homeostasis;cellular process;establishment of localization;homeostatic process;ion transport;multicellular organismal process;neurological system process;response to stimulus;transmembrane transport;transport	cell body;cell part;cell projection;macromolecular complex;membrane;neuron projection;neuronal cell body;protein complex		DUF3451;Ion_trans;Na_trans_assoc	AACTTT_UNKNOWN;ABBUD_LIF_SIGNALING_2_DN;ALK_DN.V1_UP;BLALOCK_ALZHEIMERS_DISEASE_DN;CHESLER_BRAIN_HIGHEST_EXPRESSION;chr2q23;chr2q24;GSE13229_IMM_VS_INTMATURE_NKCELL_UP;GSE1432_CTRL_VS_IFNG_1H_MICROGLIA_DN;GSE14350_IL2RB_KO_VS_WT_TEFF_UP;GSE15930_STIM_VS_STIM_AND_IFNAB_24H_CD8_T_CELL_UP;GSE15930_STIM_VS_STIM_AND_IL-12_72H_CD8_T_CELL_DN;GSE15930_STIM_VS_STIM_AND_TRICHOSTATINA_24H_CD8_T_CELL_DN;GSE1…	Completeproteome;Ionchannel;Iontransport;Membrane;Referenceproteome;Sodium;Sodiumchannel;Sodiumtransport;Transmembrane;Transmembranehelix;Transport;Voltage-gatedchannel		GO:0001508;GO:0003008;GO:0006810;GO:0006811;GO:0006812;GO:0006814;GO:0006873;GO:0007610;GO:0007626;GO:0007628;GO:0008344;GO:0009987;GO:0015672;GO:0019227;GO:0019228;GO:0019725;GO:0030001;GO:0030534;GO:0032501;GO:0034220;GO:0035725;GO:0042391;GO:0042592;GO:0048878;GO:0050801;GO:0050877;GO:0050884;GO:0050896;GO:0050905;GO:0051234;GO:0055082;GO:0055085;GO:0065007;GO:0065008	GO:0005215;GO:0005216;GO:0005244;GO:0005248;GO:0005261;GO:0005272;GO:0008324;GO:0015075;GO:0015267;GO:0022803;GO:0022832;GO:0022836;GO:0022838;GO:0022843;GO:0022857;GO:0022891;GO:0022892	GO:0001518;GO:0005911;GO:0014704;GO:0016020;GO:0030054;GO:0030315;GO:0030424;GO:0032991;GO:0033267;GO:0033268;GO:0034702;GO:0034703;GO:0034706;GO:0042995;GO:0043005;GO:0043025;GO:0043194;GO:0043234;GO:0044291;GO:0044297;GO:0044425;GO:0044459;GO:0044463;GO:0044464
13.9362554550171	13.2723016738892	14.6227378845215	14.3067741394043	15.1846046447754	14.6984872817993	14.4361257553101	14.5007171630859	13.8032083511353	14.54212474823	14.3937931060791	14.657262802124	14.4736423492432	14.3621606826782	15.1165065765381	14.8008489608765	15.3424215316772	14.3478984832764	14.914758682251	13.7089366912842	14.3215761184692	14.0810375213623	14.7823839187622	15.4927339553833	13.5640306472778	15.173716545105	14.8200778961182	14.6178693771362	13.7734479904175	14.6722040176392	13.6107139587402	14.116325378418					cellular component assembly;cellular component assembly at cellular level;cellular component biogenesis;cellular component organization;cellular component organization at cellular level;cellular component organization or biogenesis;cellular component organization or biogenesis at cellular level;cellular macromolecular complex assembly;cellular macromolecular complex subunit organization;cellular …	catalytic activity;methyltransferase activity;transferase activity;transferase activity, transferring one-carbon groups	cell part;cytoplasmic part;extrinsic to membrane;extrinsic to mitochondrial inner membrane;extrinsic to organelle membrane;intracellular membrane-bounded organelle;intracellular organelle;intracellular organelle part;intracellular part;membrane part;membrane-bounded organelle;mitochondrial membrane part;mitochondrial part;mitochondrion;organelle;organelle part	cellular component assembly;cellular component organization;cellular macromolecular complex assembly;cellular process;macromolecular complex assembly;protein complex assembly;protein complex biogenesis	cell part;intracellular membrane-bounded organelle;intracellular organelle;mitochondrion;organelle		Methyltransf_11		Alternativesplicing;Completeproteome;Membrane;Methyltransferase;Mitochondrion;Mitochondrioninnermembrane;Referenceproteome;Transferase;Transitpeptide		GO:0006461;GO:0009987;GO:0010257;GO:0016043;GO:0022607;GO:0032981;GO:0033108;GO:0034621;GO:0034622;GO:0043623;GO:0043933;GO:0044085;GO:0065003;GO:0070271;GO:0071822;GO:0071840;GO:0071841;GO:0071842;GO:0071844;GO:0097031	GO:0003824;GO:0008168;GO:0016740;GO:0016741	GO:0005739;GO:0019898;GO:0031312;GO:0031314;GO:0043226;GO:0043227;GO:0043229;GO:0043231;GO:0044422;GO:0044424;GO:0044425;GO:0044429;GO:0044444;GO:0044446;GO:0044455;GO:0044464
14.5399694442749	14.8125534057617	13.4604253768921	13.3934354782104	13.6741333007813	14.8638162612915	13.9519186019897	13.2164897918701	13.8290166854858	13.4005756378174	13.6966743469238	14.5213251113892	13.8932294845581	14.4545459747314	14.1615915298462	14.7040758132935	13.446738243103	14.2354612350464	14.1855421066284	14.5112285614014	13.5700254440308	13.8930139541626	12.6774415969849	14.3318557739258	13.8930349349976	13.0380668640137	14.9421558380127	12.8494091033936	13.9181642532349	14.3618850708008	13.5759935379028	13.5503587722778					biological regulation;biosynthetic process;blastocyst growth;cell fate commitment;cell fate commitment involved in formation of primary germ layers;cell surface receptor linked signaling pathway;cellular biosynthetic process;cellular component organization;cellular component organization at cellular level;cellular component organization or biogenesis;cellular component organization or biogenesis …	binding;DNA binding;nucleic acid binding;single-stranded DNA binding;structure-specific DNA binding	Cdc73/Paf1 complex;cell part;intracellular non-membrane-bounded organelle;intracellular organelle;intracellular organelle part;intracellular part;macromolecular complex;non-membrane-bounded organelle;nuclear part;nucleolus;nucleoplasm part;organelle;organelle part;protein complex;transcription elongation factor complex	biological regulation;biosynthetic process;cellular component organization;cellular metabolic process;cellular nitrogen compound metabolic process;cellular process;chromatin modification;chromatin organization;chromosome organization;developmental process;growth;histone modification;macromolecule metabolic process;macromolecule modification;metabolic process;nitrogen compound metabolic process;nu…	cell part;intracellular non-membrane-bounded organelle;intracellular organelle;macromolecular complex;nucleolus;organelle;protein complex;transcription elongation factor complex		Plus-3	AATGTGA,MIR-23A,MIR-23B;ACCATTT,MIR-522;ACTGTAG,MIR-139;ATGCAGT,MIR-217;CAGTATT,MIR-200B,MIR-200C,MIR-429;CAGTGTT,MIR-141,MIR-200A;CCTGCTG,MIR-214;chr15q14;CTTTGT_V$LEF1_Q2;CTTTGTA,MIR-524;DOUGLAS_BMI1_TARGETS_UP;FORTSCHEGGER_PHF8_TARGETS_DN;GABRIELY_MIR21_TARGETS;GGGAGGRR_V$MAZ_Q6;GGGNRMNNYCAT_UNKNOWN;GSE10239_KLRG1INT_VS_KLRG1HIGH_EFF_CD8_TCELL_DN;GSE11864_UNTREATED_VS_CSF1_PAM3CYS_IN_MAC_UP;GS…	Activator;Coiledcoil;Completeproteome;DNA-binding;Nucleus;Phosphoprotein;Referenceproteome;Transcription;Transcriptionregulation;Wntsignalingpathway		GO:0000122;GO:0001711;GO:0001832;GO:0006139;GO:0006325;GO:0006352;GO:0006355;GO:0006357;GO:0006464;GO:0006479;GO:0006730;GO:0006807;GO:0006996;GO:0007165;GO:0007166;GO:0008152;GO:0008213;GO:0009058;GO:0009889;GO:0009890;GO:0009891;GO:0009892;GO:0009893;GO:0009987;GO:0010468;GO:0010556;GO:0010557;GO:0010558;GO:0010604;GO:0010605;GO:0010628;GO:0010629;GO:0010638;GO:0016043;GO:0016055;GO:0016070;GO:…	GO:0003676;GO:0003677;GO:0003697;GO:0005488;GO:0043566	GO:0005730;GO:0008023;GO:0016593;GO:0032991;GO:0043226;GO:0043228;GO:0043229;GO:0043232;GO:0043234;GO:0044422;GO:0044424;GO:0044428;GO:0044446;GO:0044451;GO:0044464
17.0263729095459	17.114616394043	17.2751235961914	17.4408683776855	17.117561340332	17.1488742828369	17.5610790252686	17.3051891326904	16.5503253936768	17.381441116333	17.5405673980713	17.134204864502	17.5527000427246	17.3165473937988	17.1015453338623	17.2591171264648	16.8376274108887	17.4547481536865	17.3246555328369	17.5307712554932	17.7600708007813	16.8631458282471	17.4930267333984	17.6087017059326	17.3161926269531	17.2675552368164	17.0083198547363	17.0586471557617	16.9611549377441	17.6557121276855	17.5332088470459	17.0476131439209					anatomical structure development;developmental process;embryonic skeletal system development;skeletal system development;system development		cell part;cytoplasm;intracellular part	anatomical structure development;developmental process	cell part;cytoplasm				Alternativesplicing;Coiledcoil;Completeproteome;Cytoplasm;Developmentalprotein;Glycoprotein;Phosphoprotein;Referenceproteome		GO:0001501;GO:0032502;GO:0048706;GO:0048731;GO:0048856		GO:0005737;GO:0044424;GO:0044464
14.0126838684082	12.3478679656982	14.7965974807739	12.9300737380981	15.1082792282104	14.0117721557617	14.9794254302979	14.1626176834106	13.1324529647827	15.2645893096924	14.0594940185547	13.36891746521	14.5975818634033	14.2957525253296	14.9117660522461	13.0350885391235	13.7731132507324	14.7220067977905	15.1491918563843	14.3055210113525	14.9183044433594	14.8610887527466	13.4688806533813	14.7776145935059	13.1067600250244	15.7102956771851	13.2702169418335	14.6746339797974	14.4672908782959	13.51540184021	13.7818193435669	13.7472248077393					alcohol metabolic process;carbohydrate metabolic process;cellular carbohydrate metabolic process;cellular metabolic process;cellular process;inositol metabolic process;metabolic process;polyol metabolic process;primary metabolic process;small molecule metabolic process	acid phosphatase activity;adenyl nucleotide binding;adenyl ribonucleotide binding;ATP binding;binding;catalytic activity;diphosphoinositol-pentakisphosphate kinase activity;hydrolase activity;hydrolase activity, acting on ester bonds;inositol 1,3,4,5,6-pentakisphosphate kinase activity;inositol hexakisphosphate 1-kinase activity;inositol hexakisphosphate 3-kinase activity;inositol hexakisphosphat…	cell part;cytoplasm;cytoplasmic part;cytosol;intracellular organelle part;intracellular part;membrane;nuclear part;nucleoplasm;organelle part;plasma membrane	alcohol metabolic process;carbohydrate metabolic process;cellular metabolic process;cellular process;metabolic process;primary metabolic process;small molecule metabolic process	cell part;cytoplasm;cytosol;membrane;nucleoplasm;plasma membrane		His_Phos_2	CADWELL_ATG16L1_TARGETS_DN;CAGGGTC,MIR-504;chr15q15;DODD_NASOPHARYNGEAL_CARCINOMA_UP;GATTGGY_V$NFY_Q6_01;GAZDA_DIAMOND_BLACKFAN_ANEMIA_ERYTHROID_DN;GSE11924_TH1_VS_TH17_CD4_TCELL_DN;GSE13306_TREG_RA_VS_TCONV_RA_DN;GSE14308_INDUCED_VS_NATURAL_TREG_UP;GSE14308_TH1_VS_INDUCED_TREG_DN;GSE14308_TH17_VS_INDUCED_TREG_DN;GSE14308_TH2_VS_INDUCED_TREG_DN;GSE1460_CD4_THYMOCYTE_VS_NAIVE_CD4_TCELL_ADULT_BLOOD…	Alternativesplicing;ATP-binding;Cellmembrane;Completeproteome;Cytoplasm;Kinase;Membrane;Nucleotide-binding;Phosphoprotein;Referenceproteome;Transferase		GO:0005975;GO:0006020;GO:0006066;GO:0008152;GO:0009987;GO:0019751;GO:0044237;GO:0044238;GO:0044262;GO:0044281	GO:0000166;GO:0000826;GO:0000827;GO:0000828;GO:0000832;GO:0003824;GO:0003993;GO:0004428;GO:0005488;GO:0005524;GO:0016301;GO:0016740;GO:0016772;GO:0016776;GO:0016787;GO:0016788;GO:0016791;GO:0017076;GO:0030554;GO:0032553;GO:0032555;GO:0032559;GO:0033857;GO:0035639;GO:0042578;GO:0052723;GO:0052724	GO:0005654;GO:0005737;GO:0005829;GO:0005886;GO:0016020;GO:0044422;GO:0044424;GO:0044428;GO:0044444;GO:0044446;GO:0044464
15.9897489547729	16.382438659668	17.3499202728271	17.0711688995361	16.1713714599609	17.3099021911621	16.7999401092529	16.5317325592041	16.7102146148682	17.127571105957	16.0188083648682	16.5455074310303	16.5727882385254	16.2375831604004	16.2344245910645	16.3291473388672	17.0218257904053	16.7766132354736	16.6487789154053	16.2003231048584	16.9767875671387	16.5959129333496	16.8124027252197	16.3748188018799	15.8589277267456	17.141508102417	16.5011367797852	16.4337158203125	16.6129550933838	16.1963710784912	16.4230346679688	16.9000644683838					biological regulation;cell communication;cell differentiation;cell-cell signaling;cellular component organization;cellular component organization or biogenesis;cellular developmental process;cellular localization;cellular macromolecule localization;cellular macromolecule metabolic process;cellular membrane organization;cellular metabolic process;cellular process;cellular protein localization;deve…	acetylcholine receptor regulator activity;ATPase inhibitor activity;ATPase regulator activity;binding;calcium ion binding;carbohydrate binding;cation binding;chondroitin sulfate binding;dystroglycan binding;enzyme inhibitor activity;enzyme regulator activity;glycoprotein binding;glycosaminoglycan binding;heparan sulfate proteoglycan binding;ion binding;ion channel binding;metal ion binding;monosa…	basal lamina;basement membrane;cell junction;cell part;cell surface;cytoplasm;cytoplasmic part;extracellular matrix;extracellular matrix part;extracellular membrane-bounded organelle;extracellular organelle;extracellular region;extracellular region part;extracellular space;extracellular vesicular exosome;Golgi apparatus part;Golgi lumen;integral to membrane;intracellular organelle lumen;intracell…	biological regulation;cell communication;cell differentiation;cell-cell signaling;cellular component organization;cellular localization;cellular membrane organization;cellular metabolic process;cellular process;developmental process;localization;macromolecule metabolic process;membrane organization;metabolic process;multicellular organismal development;multicellular organismal process;plasma memb…	cell part;cell surface;cytoplasm;extracellular matrix;extracellular organelle;extracellular region;extracellular space;membrane;organelle;plasma membrane;synapse;vesicle		EGF;Kazal_1;Kazal_2;Laminin_EGF;Laminin_G_1;SEA	ACTGTGA,MIR-27A,MIR-27B;ALFANO_MYC_TARGETS;AMIT_EGF_RESPONSE_480_HELA;AMUNDSON_POOR_SURVIVAL_AFTER_GAMMA_RADIATION_2G;ANATOMICAL_STRUCTURE_DEVELOPMENT;ATACTGT,MIR-144;BAELDE_DIABETIC_NEPHROPATHY_DN;BASAL_LAMINA;BASEMENT_MEMBRANE;BENNETT_SYSTEMIC_LUPUS_ERYTHEMATOSUS;BLALOCK_ALZHEIMERS_DISEASE_UP;BMI1_DN.V1_UP;BRUINS_UVC_RESPONSE_LATE;BRUINS_UVC_RESPONSE_VIA_TP53_GROUP_A;BRUINS_UVC_RESPONSE_VIA_TP5…	3D-structure;Alternativesplicing;Calcium;Celljunction;Cellmembrane;Completeproteome;Developmentalprotein;Differentiation;Disulfidebond;EGF-likedomain;Glycoprotein;Heparansulfate;LamininEGF-likedomain;Membrane;Polymorphism;Proteoglycan;Referenceproteome;Repeat;Signal-anchor;Synapse;Transmembrane;Transmembranehelix		GO:0001932;GO:0001934;GO:0006140;GO:0006355;GO:0006357;GO:0006937;GO:0006942;GO:0007009;GO:0007154;GO:0007267;GO:0007268;GO:0007275;GO:0007528;GO:0008016;GO:0008104;GO:0008152;GO:0008582;GO:0009889;GO:0009891;GO:0009893;GO:0009894;GO:0009966;GO:0009987;GO:0010468;GO:0010469;GO:0010556;GO:0010557;GO:0010562;GO:0010604;GO:0010628;GO:0010941;GO:0010942;GO:0016043;GO:0016044;GO:0016202;GO:0019219;GO:…	GO:0001871;GO:0001948;GO:0002162;GO:0004857;GO:0005488;GO:0005509;GO:0005515;GO:0005529;GO:0005539;GO:0030234;GO:0030246;GO:0030247;GO:0030545;GO:0030548;GO:0033691;GO:0035374;GO:0042030;GO:0043167;GO:0043169;GO:0043394;GO:0043395;GO:0044325;GO:0046872;GO:0048029;GO:0060589;GO:0060590	GO:0005576;GO:0005604;GO:0005605;GO:0005615;GO:0005737;GO:0005796;GO:0005886;GO:0009986;GO:0016020;GO:0016021;GO:0030054;GO:0031012;GO:0031224;GO:0031974;GO:0031982;GO:0031988;GO:0043226;GO:0043227;GO:0043230;GO:0043233;GO:0044420;GO:0044421;GO:0044422;GO:0044424;GO:0044425;GO:0044431;GO:0044444;GO:0044446;GO:0044464;GO:0045202;GO:0065010;GO:0070013;GO:0070062
13.2130355834961	13.2093448638916	13.1475324630737	12.8700075149536	13.7737846374512	13.7036466598511	13.6974411010742	14.1165218353271	14.3423204421997	14.0905284881592	14.9505577087402	13.9163255691528	14.3548021316528	15.0369205474854	14.5399293899536	14.0784358978271	12.8006868362427	13.961784362793	13.2966003417969	14.6509284973145	14.3693370819092	14.3236227035522	14.7599143981934	13.8623447418213	14.436261177063	13.967885017395	14.4269104003906	13.7098093032837	13.9468259811401	13.8974609375	14.2138938903809	13.5866451263428					adipose tissue development;anatomical structure development;ATP metabolic process;calcium ion transmembrane transport;calcium ion transport;camera-type eye development;cation transport;cellular metabolic process;cellular nitrogen compound metabolic process;cellular process;cellular respiration;developmental process;divalent inorganic cation transport;divalent metal ion transport;energy derivation…	binding;calcium ion binding;cation binding;ion binding;metal ion binding	cell part;cytoplasmic part;extracellular membrane-bounded organelle;extracellular organelle;extracellular region part;extracellular vesicular exosome;integral to membrane;intracellular membrane-bounded organelle;intracellular organelle;intracellular organelle part;intracellular part;intrinsic to membrane;membrane;membrane part;membrane-bounded organelle;membrane-bounded vesicle;mitochondrial inne…	anatomical structure development;cellular metabolic process;cellular nitrogen compound metabolic process;cellular process;cellular respiration;developmental process;establishment of localization;generation of precursor metabolites and energy;growth;heterocycle metabolic process;ion transport;metabolic process;multicellular organismal process;nitrogen compound metabolic process;nucleobase-containi…	cell part;extracellular organelle;intracellular membrane-bounded organelle;intracellular organelle;membrane;mitochondrion;organelle;vesicle		EF-hand_7;Mito_carr	AACTGGA,MIR-145;ACATTCC,MIR-1,MIR-206;BHAT_ESR1_TARGETS_VIA_AKT1_UP;BOCHKIS_FOXA2_TARGETS;BURTON_ADIPOGENESIS_1;CAATGCA,MIR-33;chr9q34;CRX_DN.V1_UP;CRX_NRL_DN.V1_UP;GARGALOVIC_RESPONSE_TO_OXIDIZED_PHOSPHOLIPIDS_TURQUOISE_UP;GGGACCA,MIR-133A,MIR-133B;GRAESSMANN_APOPTOSIS_BY_DOXORUBICIN_UP;GSE10856_CTRL_VS_TNFRSF6B_IN_MACROPHAGE_DN;GSE11924_TH1_VS_TH17_CD4_TCELL_UP;GSE14769_UNSTIM_VS_40MIN_LPS_BMDM…	Alternativesplicing;Calcium;Completeproteome;Membrane;Metal-binding;Mitochondrion;Mitochondrioninnermembrane;Referenceproteome;Repeat;Transmembrane;Transmembranehelix;Transport		GO:0001654;GO:0002021;GO:0006091;GO:0006139;GO:0006163;GO:0006753;GO:0006807;GO:0006810;GO:0006811;GO:0006812;GO:0006816;GO:0007423;GO:0008152;GO:0009117;GO:0009141;GO:0009144;GO:0009150;GO:0009199;GO:0009205;GO:0009259;GO:0009605;GO:0009888;GO:0009987;GO:0009991;GO:0014823;GO:0015980;GO:0030001;GO:0031667;GO:0032094;GO:0032501;GO:0032502;GO:0034220;GO:0034641;GO:0035264;GO:0040007;GO:0042221;GO:…	GO:0005488;GO:0005509;GO:0043167;GO:0043169;GO:0046872	GO:0005739;GO:0005743;GO:0016020;GO:0016021;GO:0019866;GO:0031090;GO:0031224;GO:0031966;GO:0031982;GO:0031988;GO:0043226;GO:0043227;GO:0043229;GO:0043230;GO:0043231;GO:0044421;GO:0044422;GO:0044424;GO:0044425;GO:0044429;GO:0044444;GO:0044446;GO:0044464;GO:0065010;GO:0070062
15.6629467010498	15.9571924209595	16.2542343139648	16.1135787963867	16.1330413818359	16.5729064941406	16.2508907318115	15.932053565979	15.9424457550049	15.989239692688	15.7689599990845	16.0059757232666	16.6571788787842	16.4744510650635	16.0329074859619	16.3873615264893	16.1701984405518	16.204532623291	16.2913513183594	16.2260360717773	16.3625259399414	16.6602458953857	16.616117477417	15.9759826660156	15.2390394210815	16.1537704467773	16.3202018737793	15.4871807098389	16.3107013702393	16.2170867919922	16.1651229858398	16.0007038116455							extracellular membrane-bounded organelle;extracellular organelle;extracellular region part;extracellular vesicular exosome;membrane-bounded organelle;membrane-bounded vesicle;organelle;vesicle		extracellular organelle;organelle;vesicle		UPF0560	ACTGCCT,MIR-34B;ATGCTGC,MIR-103,MIR-107;BERENJENO_TRANSFORMED_BY_RHOA_UP;BILD_E2F3_ONCOGENIC_SIGNATURE;CASORELLI_ACUTE_PROMYELOCYTIC_LEUKEMIA_DN;CHARAFE_BREAST_CANCER_BASAL_VS_MESENCHYMAL_DN;CHARAFE_BREAST_CANCER_LUMINAL_VS_BASAL_DN;CHARAFE_BREAST_CANCER_LUMINAL_VS_MESENCHYMAL_DN;CHIANG_LIVER_CANCER_SUBCLASS_POLYSOMY7_DN;chr10p13;CREIGHTON_ENDOCRINE_THERAPY_RESISTANCE_3;CTATGCA,MIR-153;CTCCAAG,MI…	Completeproteome;Proteomicsidentification;Referenceproteome				GO:0031982;GO:0031988;GO:0043226;GO:0043227;GO:0043230;GO:0044421;GO:0065010;GO:0070062
17.0378894805908	17.2177867889404	16.7950000762939	17.4361591339111	17.3841438293457	16.73264503479	16.9330673217773	16.974437713623	16.8807067871094	17.1918106079102	17.0563201904297	17.1992130279541	17.3432559967041	17.6598987579346	17.5626449584961	17.2843723297119	16.8473262786865	17.4254627227783	16.7381973266602	17.3658103942871	16.6601066589355	16.8608436584473	17.3690528869629	17.471118927002	17.3273773193359	17.0724258422852	17.3047428131104	16.7845573425293	16.5782833099365	17.4849491119385	17.4097232818604	17.0708541870117					biological regulation;cell cycle;cellular process;positive regulation of catalytic activity;positive regulation of GTPase activity;positive regulation of hydrolase activity;positive regulation of molecular function;regulation of biological process;regulation of catabolic process;regulation of catalytic activity;regulation of cellular catabolic process;regulation of cellular metabolic process;regu…	binding;enzyme activator activity;enzyme binding;enzyme regulator activity;GTPase activator activity;GTPase binding;GTPase regulator activity;nucleoside-triphosphatase regulator activity;protein binding;Rab GTPase binding;Ras GTPase binding;small GTPase binding	cell part;cytoplasmic part;cytoskeletal part;cytosol;intracellular organelle part;intracellular part;microtubule organizing center;organelle part	biological regulation;cell cycle;cellular process	cell part;cytosol;microtubule organizing center		DUF3694;PID;RabGAP-TBC	AACTTT_UNKNOWN;AAGCACT,MIR-520F;AGCACTT,MIR-93,MIR-302A,MIR-302B,MIR-302C,MIR-302D,MIR-372,MIR-373,MIR-520E,MIR-520A,MIR-526B,MIR-520B,MIR-520C,MIR-520D;BERTUCCI_MEDULLARY_VS_DUCTAL_BREAST_CANCER_DN;BLALOCK_ALZHEIMERS_DISEASE_UP;BOQUEST_STEM_CELL_CULTURED_VS_FRESH_UP;BOYAULT_LIVER_CANCER_SUBCLASS_G1_UP;BUYTAERT_PHOTODYNAMIC_THERAPY_STRESS_UP;CACGTG_V$MYC_Q2;CACTTTG,MIR-520G,MIR-520H;CAGTGTT,MIR-1…	Alternativesplicing;Cellcycle;Coiledcoil;Completeproteome;Cytoplasm;Cytoskeleton;GTPaseactivation;Phosphoprotein;Referenceproteome		GO:0006140;GO:0007049;GO:0009894;GO:0009987;GO:0019219;GO:0019222;GO:0030811;GO:0031323;GO:0031329;GO:0033121;GO:0033124;GO:0043085;GO:0043087;GO:0043547;GO:0044093;GO:0050789;GO:0050790;GO:0050794;GO:0051171;GO:0051336;GO:0051345;GO:0065007;GO:0065009;GO:0080090	GO:0005096;GO:0005488;GO:0005515;GO:0008047;GO:0017016;GO:0017137;GO:0019899;GO:0030234;GO:0030695;GO:0031267;GO:0051020;GO:0060589	GO:0005815;GO:0005829;GO:0044422;GO:0044424;GO:0044430;GO:0044444;GO:0044446;GO:0044464
14.1353664398193	13.2312660217285	15.0247497558594	14.6949024200439	14.137791633606	14.4405450820923	14.3300065994263	13.9654235839844	12.4915027618408	14.4860181808472	13.2728776931763	12.9831008911133	13.5076885223389	12.2110061645508	14.1107769012451	14.2024402618408	13.5820245742798	14.5568656921387	13.8346681594849	15.0325012207031	14.3320369720459	13.9274072647095	14.540431022644	14.596640586853	11.9161405563354	14.9679470062256	14.1891212463379	15.5870447158813	13.4590873718262	13.8608932495117	12.6879663467407	14.0432834625244					aromatic compound biosynthetic process;biosynthetic process;cellular aromatic compound metabolic process;cellular biosynthetic process;cellular macromolecule metabolic process;cellular metabolic process;cellular nitrogen compound biosynthetic process;cellular nitrogen compound metabolic process;cellular process;cellular protein metabolic process;coenzyme biosynthetic process;coenzyme metabolic pr…	adenyl nucleotide binding;adenyl ribonucleotide binding;adenylyltransferase activity;ATP binding;binding;catalytic activity;cation binding;ion binding;metal ion binding;nucleotide binding;nucleotidyltransferase activity;protein adenylyltransferase activity;purine nucleotide binding;purine ribonucleoside triphosphate binding;purine ribonucleotide binding;ribonucleotide binding;small protein activa…	cell part;cytoplasmic part;cytosol;intracellular part	biosynthetic process;cellular aromatic compound metabolic process;cellular metabolic process;cellular nitrogen compound metabolic process;cellular process;cofactor metabolic process;heterocycle metabolic process;macromolecule metabolic process;macromolecule modification;metabolic process;nitrogen compound metabolic process;nucleobase-containing compound metabolic process;peptidyl-amino acid modif…	cell part;cytosol	Sulfur relay system	MoeZ_MoeB;Rhodanese;ThiF	BENPORATH_MYC_MAX_TARGETS;BROWNE_HCMV_INFECTION_48HR_DN;BROWNE_HCMV_INFECTION_4HR_DN;chr20q13;DANG_BOUND_BY_MYC;GGAANCGGAANY_UNKNOWN;GSE13411_NAIVE_VS_IGM_MEMORY_BCELL_DN;GSE14026_TH1_VS_TH17_UP;GSE17974_0H_VS_24H_IN_VITRO_ACT_CD4_TCELL_DN;GSE18148_CBFB_KO_VS_WT_TREG_UP;GSE20151_CTRL_VS_FUSOBACT_NUCLEATUM_NEUTROPHIL_UP;GSE32423_CTRL_VS_IL7_IL4_MEMORY_CD8_TCELL_DN;GSE3982_BASOPHIL_VS_EFF_MEMORY_CD…	ATP-binding;Completeproteome;Cytoplasm;Disulfidebond;Metal-binding;Molybdenumcofactorbiosynthesis;Multifunctionalenzyme;Nucleotide-binding;Referenceproteome;Transferase;tRNAprocessing;Zinc		GO:0002097;GO:0002098;GO:0002143;GO:0006139;GO:0006396;GO:0006399;GO:0006400;GO:0006464;GO:0006725;GO:0006732;GO:0006777;GO:0006807;GO:0008033;GO:0008152;GO:0009058;GO:0009108;GO:0009451;GO:0009987;GO:0016070;GO:0018117;GO:0018130;GO:0018175;GO:0018192;GO:0018193;GO:0018198;GO:0018307;GO:0019438;GO:0019538;GO:0019720;GO:0032324;GO:0032446;GO:0032447;GO:0034227;GO:0034470;GO:0034641;GO:0034660;GO:…	GO:0000166;GO:0003824;GO:0004792;GO:0005488;GO:0005524;GO:0008641;GO:0016740;GO:0016772;GO:0016779;GO:0016782;GO:0016783;GO:0017076;GO:0030554;GO:0032553;GO:0032555;GO:0032559;GO:0035639;GO:0042292;GO:0043167;GO:0043169;GO:0046872;GO:0070566;GO:0070733	GO:0005829;GO:0044424;GO:0044444;GO:0044464
13.0261888504028	12.9198436737061	14.9493703842163	14.6764440536499	13.2440605163574	15.8518953323364	14.1736030578613	13.6184997558594	13.333625793457	14.9507837295532	13.9149780273438	14.6827754974365	14.1469144821167	14.2958669662476	12.4554061889648	15.1930246353149	13.0962429046631	14.6507911682129	12.6265726089478	14.0246934890747	15.1290416717529	13.8630409240723	15.661416053772	14.2080011367798	14.577841758728	15.4322481155396	13.5612525939941	15.0289421081543	13.5220823287964	14.8746452331543	13.3518028259277	14.1155309677124					anatomical structure development;anatomical structure formation involved in morphogenesis;androgen receptor signaling pathway;ATP-dependent chromatin remodeling;biological regulation;biosynthetic process;blood vessel development;cardiac cell differentiation;cardiac chamber development;cardiac muscle cell differentiation;cell differentiation;cellular biosynthetic process;cellular component disasse…	binding;DNA binding;ligand-dependent nuclear receptor binding;nucleic acid binding;protein binding;receptor binding	cell part;chromatin;chromatin remodeling complex;chromosomal part;intracellular organelle part;intracellular part;macromolecular complex;nBAF complex;npBAF complex;nuclear chromatin;nuclear chromosome part;nuclear part;nucleoplasm;organelle part;protein complex;SWI/SNF complex;SWI/SNF-type complex	anatomical structure development;anatomical structure formation involved in morphogenesis;biological regulation;biosynthetic process;cell differentiation;cellular component disassembly;cellular component organization;cellular metabolic process;cellular nitrogen compound metabolic process;cellular process;chromatin modification;chromatin organization;chromosome organization;developmental process;m…	cell part;chromatin remodeling complex;macromolecular complex;nucleoplasm;protein complex		ARID;DUF3518	AAAYRNCTG_UNKNOWN;AACTTT_UNKNOWN;ACACTGG,MIR-199A,MIR-199B;ACCAAAG,MIR-9;AGCTCCT,MIR-28;AGGGCAG,MIR-18A;ANDROGEN_RECEPTOR_SIGNALING_PATHWAY;ATAAGCT,MIR-21;ATACTGT,MIR-144;ATGTACA,MIR-493;ATGTAGC,MIR-221,MIR-222;BENPORATH_EED_TARGETS;BIOPOLYMER_METABOLIC_PROCESS;BLALOCK_ALZHEIMERS_DISEASE_INCIPIENT_UP;BLALOCK_ALZHEIMERS_DISEASE_UP;BRUINS_UVC_RESPONSE_EARLY_LATE;BURTON_ADIPOGENESIS_12;BYSTRYKH_HEMA…	Acetylation;Alternativesplicing;Chromatinregulator;Completeproteome;DNA-binding;Neurogenesis;Nucleus;Phosphoprotein;Referenceproteome;Transcription;Transcriptionregulation		GO:0000122;GO:0001568;GO:0001843;GO:0003205;GO:0003408;GO:0006139;GO:0006325;GO:0006337;GO:0006338;GO:0006344;GO:0006351;GO:0006355;GO:0006357;GO:0006807;GO:0006996;GO:0007165;GO:0008152;GO:0009058;GO:0009059;GO:0009889;GO:0009890;GO:0009891;GO:0009892;GO:0009893;GO:0009987;GO:0010468;GO:0010556;GO:0010557;GO:0010558;GO:0010604;GO:0010605;GO:0010628;GO:0010629;GO:0016043;GO:0016070;GO:0016568;GO:…	GO:0003676;GO:0003677;GO:0005102;GO:0005488;GO:0005515;GO:0016922	GO:0000785;GO:0000790;GO:0005654;GO:0016514;GO:0016585;GO:0032991;GO:0043234;GO:0044422;GO:0044424;GO:0044427;GO:0044428;GO:0044446;GO:0044454;GO:0044464;GO:0070603;GO:0071564;GO:0071565
14.5585556030273	12.9641942977905	13.7818212509155	13.8918905258179	12.8134822845459	13.8196535110474	13.1789112091064	13.8880157470703	12.9556112289429	14.0146341323853	13.5029392242432	14.7669095993042	13.5251617431641	14.3310060501099	13.7089252471924	13.2882699966431	13.2009468078613	13.7754697799683	14.5177774429321	13.8833799362183	13.8187799453735	14.3919258117676	14.3494682312012	13.1357746124268	13.1793212890625	13.877968788147	13.9330883026123	13.850001335144	13.9629459381104	13.4733057022095	14.7574434280396	14.349591255188					aerobic respiration;anatomical structure morphogenesis;behavior;biological regulation;carbohydrate homeostasis;cell communication;cell part morphogenesis;cell surface receptor linked signaling pathway;cellular component morphogenesis;cellular component organization;cellular component organization at cellular level;cellular component organization or biogenesis;cellular component organization or bi…	binding;catalytic activity;insulin-activated receptor activity;kinase activity;molecular transducer activity;odorant binding;pheromone binding;phosphotransferase activity, alcohol group as acceptor;protein kinase activity;protein tyrosine kinase activity;receptor activity;signal transducer activity;signaling receptor activity;transferase activity;transferase activity, transferring phosphorus-cont…	cell part;cytoplasmic part;cytosol;extracellular region;extracellular region part;extracellular space;intracellular membrane-bounded organelle;intracellular organelle;intracellular part;membrane-bounded organelle;nucleus;organelle	anatomical structure morphogenesis;behavior;biological regulation;cell communication;cellular component morphogenesis;cellular component organization;cellular metabolic process;cellular process;cellular respiration;developmental process;energy reserve metabolic process;generation of precursor metabolites and energy;homeostatic process;metabolic process;mitochondrion organization;multicellular org…	cell part;cytosol;extracellular region;extracellular space;intracellular membrane-bounded organelle;intracellular organelle;nucleus;organelle		Lipocalin		3D-structure;Allergen;Completeproteome;Disulfidebond;Pheromone-binding;Referenceproteome;Secreted;Signal;Transport		GO:0001659;GO:0002791;GO:0002792;GO:0006091;GO:0006109;GO:0006111;GO:0006112;GO:0006355;GO:0006950;GO:0006996;GO:0007005;GO:0007154;GO:0007165;GO:0007166;GO:0007167;GO:0007169;GO:0007610;GO:0007622;GO:0007623;GO:0007626;GO:0008152;GO:0008286;GO:0009060;GO:0009267;GO:0009605;GO:0009653;GO:0009719;GO:0009725;GO:0009889;GO:0009890;GO:0009892;GO:0009893;GO:0009966;GO:0009967;GO:0009987;GO:0009991;GO:…	GO:0003824;GO:0004672;GO:0004713;GO:0004714;GO:0004871;GO:0004872;GO:0004888;GO:0005009;GO:0005215;GO:0005488;GO:0005549;GO:0005550;GO:0016301;GO:0016740;GO:0016772;GO:0016773;GO:0019199;GO:0038023;GO:0060089	GO:0005576;GO:0005615;GO:0005634;GO:0005829;GO:0043226;GO:0043227;GO:0043229;GO:0043231;GO:0044421;GO:0044424;GO:0044444;GO:0044464
18.0310649871826	18.3954830169678	17.9915885925293	17.6213512420654	18.1640815734863	17.3566417694092	17.8934440612793	17.9968376159668	18.1797637939453	18.0706443786621	18.1253032684326	18.0003623962402	18.1179676055908	18.4536247253418	18.3304882049561	18.1676139831543	18.0652370452881	18.2916736602783	17.9422054290771	18.5449867248535	17.8327541351318	18.172945022583	18.5289421081543	18.5972518920898	18.1426048278809	18.231071472168	18.2463226318359	17.4019966125488	17.5624217987061	18.237154006958	18.1641807556152	17.8251953125					biological regulation;positive regulation of catalytic activity;positive regulation of GTPase activity;positive regulation of hydrolase activity;positive regulation of molecular function;regulation of biological process;regulation of catabolic process;regulation of catalytic activity;regulation of cellular catabolic process;regulation of cellular metabolic process;regulation of cellular process;r…	adenyl nucleotide binding;adenyl ribonucleotide binding;ATP binding;binding;catalytic activity;cation binding;enzyme regulator activity;GTPase regulator activity;guanyl-nucleotide exchange factor activity;ion binding;kinase activity;metal ion binding;nucleoside-triphosphatase regulator activity;nucleotide binding;phosphotransferase activity, alcohol group as acceptor;protein kinase activity;prote…	cell part;cytoplasm;cytoskeleton;extracellular membrane-bounded organelle;extracellular organelle;extracellular region part;extracellular vesicular exosome;intracellular non-membrane-bounded organelle;intracellular organelle;intracellular part;membrane-bounded organelle;membrane-bounded vesicle;non-membrane-bounded organelle;organelle;vesicle	biological regulation	cell part;cytoplasm;cytoskeleton;extracellular organelle;intracellular non-membrane-bounded organelle;intracellular organelle;organelle;vesicle		CRAL_TRIO_2;fn3;I-set;Pkinase;RhoGEF;SH3_1;Spectrin	AAGCACA,MIR-218;AAGCCAT,MIR-135A,MIR-135B;AATGGAG,MIR-136;ACCAAAG,MIR-9;ACEVEDO_METHYLATED_IN_LIVER_CANCER_DN;ACTIN_CYTOSKELETON;ANATOMICAL_STRUCTURE_DEVELOPMENT;BIOPOLYMER_METABOLIC_PROCESS;BIOPOLYMER_MODIFICATION;BLALOCK_ALZHEIMERS_DISEASE_DN;BROWNE_HCMV_INFECTION_30MIN_DN;CAGTGTT,MIR-141,MIR-200A;CELLULAR_MACROMOLECULE_METABOLIC_PROCESS;CELLULAR_PROTEIN_METABOLIC_PROCESS;chr3q21;CHYLA_CBFA2T3_…	3D-structure;Alternativeinitiation;Alternativesplicing;ATP-binding;Completeproteome;Cytoplasm;Cytoskeleton;Directproteinsequencing;Disulfidebond;Guanine-nucleotidereleasingfactor;Immunoglobulindomain;Kinase;Magnesium;Metal-binding;Nucleotide-binding;Phosphoprotein;Referenceproteome;Repeat;Serine/threonine-proteinkinase;SH3domain;Transferase		GO:0006140;GO:0009894;GO:0019219;GO:0019222;GO:0030811;GO:0031323;GO:0031329;GO:0033121;GO:0033124;GO:0043085;GO:0043087;GO:0043547;GO:0044093;GO:0050789;GO:0050790;GO:0050794;GO:0051171;GO:0051336;GO:0051345;GO:0065007;GO:0065009;GO:0080090	GO:0000166;GO:0003824;GO:0004672;GO:0004674;GO:0005083;GO:0005085;GO:0005088;GO:0005089;GO:0005488;GO:0005524;GO:0016301;GO:0016740;GO:0016772;GO:0016773;GO:0017076;GO:0030234;GO:0030554;GO:0030695;GO:0032553;GO:0032555;GO:0032559;GO:0035639;GO:0043167;GO:0043169;GO:0046872;GO:0060589	GO:0005737;GO:0005856;GO:0031982;GO:0031988;GO:0043226;GO:0043227;GO:0043228;GO:0043229;GO:0043230;GO:0043232;GO:0044421;GO:0044424;GO:0044464;GO:0065010;GO:0070062
16.1036148071289	16.6581554412842	16.6938400268555	16.7497653961182	17.1586685180664	16.9806976318359	16.8435287475586	16.5439987182617	16.1900749206543	16.9128665924072	16.517053604126	16.5101146697998	16.76487159729	16.754077911377	17.2831058502197	16.9211444854736	17.0859699249268	17.0779628753662	16.7704315185547	16.6172657012939	16.8399658203125	17.1920032501221	17.0964069366455	16.1531162261963	16.4621505737305	17.1719188690186	16.6723155975342	15.5147142410278	17.1109523773193	16.885124206543	16.6207065582275	16.8213996887207											Chorein_N	AAGTCCA,MIR-422B,MIR-422A;chr12q23;ESC_J1_UP_EARLY.V1_DN;GSE10094_LCMV_VS_LISTERIA_IND_EFF_CD4_TCELL_UP;GSE13738_RESTING_VS_BYSTANDER_ACTIVATED_CD4_TCELL_DN;GSE13738_RESTING_VS_TCR_ACTIVATED_CD4_TCELL_DN;GSE14350_IL2RB_KO_VS_WT_TEFF_UP;GSE14769_40MIN_VS_360MIN_LPS_BMDM_UP;GSE17580_TREG_VS_TEFF_DN;GSE17721_POLYIC_VS_CPG_2H_BMDM_UP;GSE17721_POLYIC_VS_CPG_6H_BMDM_UP;GSE17721_POLYIC_VS_GARDIQUIMOD_12…	Coiledcoil;Completeproteome;Phosphoprotein;Referenceproteome
13.1236238479614	13.4746522903442	16.8299713134766	13.9413661956787	14.8583517074585	13.6771259307861	14.1573524475098	16.7969017028809	13.4589490890503	17.0721111297607	13.8360643386841	13.9904747009277	15.8125782012939	14.6856393814087	13.6253232955933	13.4809274673462	13.9153156280518	13.7777709960938	16.9212589263916	15.0406255722046	17.002836227417	13.8747911453247	16.5153770446777	13.5280952453613	14.6224117279053	13.1292285919189	12.7855806350708	13.4939851760864	14.6454381942749	16.4577331542969	15.2082204818726	12.5579643249512					adult behavior;adult locomotory behavior;behavior;cellular macromolecule metabolic process;cellular metabolic process;cellular nitrogen compound metabolic process;cellular process;locomotory behavior;macromolecule metabolic process;metabolic process;multicellular organismal process;ncRNA metabolic process;ncRNA processing;nitrogen compound metabolic process;nucleic acid metabolic process;nucleoba…	binding;catalytic activity;cation binding;ion binding;metal ion binding;methyltransferase activity;nucleic acid binding;RNA binding;transferase activity;transferase activity, transferring one-carbon groups;tRNA binding		behavior;cellular metabolic process;cellular nitrogen compound metabolic process;cellular process;macromolecule metabolic process;metabolic process;multicellular organismal process;nitrogen compound metabolic process;nucleobase-containing compound metabolic process;primary metabolic process;response to stimulus;RNA metabolic process;RNA processing;tRNA metabolic process;tRNA processing			TRM	ACEVEDO_LIVER_CANCER_UP;ACEVEDO_LIVER_TUMOR_VS_NORMAL_ADJACENT_TISSUE_UP;ACTAYRNNNCCCR_UNKNOWN;BLALOCK_ALZHEIMERS_DISEASE_INCIPIENT_UP;BLALOCK_ALZHEIMERS_DISEASE_UP;chr1q25;CTTTGA_V$LEF1_Q2;ESC_J1_UP_LATE.V1_DN;ESC_V6.5_UP_LATE.V1_DN;FARMER_BREAST_CANCER_APOCRINE_VS_LUMINAL;FOSTER_KDM1A_TARGETS_DN;GGGAGGRR_V$MAZ_Q6;GRAESSMANN_APOPTOSIS_BY_DOXORUBICIN_DN;GRAESSMANN_RESPONSE_TO_MC_AND_DOXORUBICIN_D…	Alternativesplicing;Behavior;Completeproteome;Metal-binding;Methyltransferase;Phosphoprotein;Referenceproteome;RNA-binding;S-adenosyl-L-methionine;Transferase;tRNA-binding;tRNAprocessing;Zinc;Zinc-finger		GO:0006139;GO:0006396;GO:0006399;GO:0006807;GO:0007610;GO:0007626;GO:0008033;GO:0008152;GO:0008344;GO:0009987;GO:0016070;GO:0030534;GO:0032501;GO:0034470;GO:0034641;GO:0034660;GO:0043170;GO:0044237;GO:0044238;GO:0044260;GO:0050896;GO:0090304	GO:0000049;GO:0003676;GO:0003723;GO:0003824;GO:0005488;GO:0008168;GO:0016740;GO:0016741;GO:0043167;GO:0043169;GO:0046872
17.7859001159668	17.8167839050293	17.3643569946289	16.8955745697021	17.6580867767334	16.9821472167969	17.2720279693604	17.2665481567383	17.6199188232422	17.4131164550781	17.6779670715332	17.9569664001465	17.831579208374	18.2024211883545	17.6536846160889	17.6196327209473	17.7633800506592	17.5001258850098	17.282564163208	18.2979106903076	16.4263954162598	17.6919345855713	17.7318496704102	17.9209690093994	17.645263671875	16.91823387146	18.4421253204346	17.61741065979	17.3982429504395	17.4692916870117	17.548038482666	18.3260173797607							cell part;cytoplasm;intracellular part		cell part;cytoplasm		LRR_7	AAGCCAT,MIR-135A,MIR-135B;ACTGTAG,MIR-139;ATAACCT,MIR-154;CAGGTG_V$E12_Q6;CHEMNITZ_RESPONSE_TO_PROSTAGLANDIN_E2_DN;chr16p13;E2F3_UP.V1_UP;FONTAINE_FOLLICULAR_THYROID_ADENOMA_UP;FONTAINE_THYROID_TUMOR_UNCERTAIN_MALIGNANCY_UP;GAGCCAG,MIR-149;GGGTGGRR_V$PAX4_03;GSE11057_PBMC_VS_MEM_CD4_TCELL_DN;GSE12366_GC_BCELL_VS_PLASMA_CELL_DN;GSE12366_PLASMA_CELL_VS_NAIVE_BCELL_UP;GSE15659_CD45RA_NEG_CD4_TCELL_V…	Completeproteome;Leucine-richrepeat;Referenceproteome;Repeat;Ublconjugationpathway				GO:0005737;GO:0044424;GO:0044464
13.7364139556885	13.6346664428711	14.5530958175659	13.2750244140625	13.7380380630493	14.7312250137329	14.2489643096924	13.107684135437	14.4628219604492	12.6807975769043	14.2864112854004	14.3609590530396	13.4210901260376	14.2398080825806	14.1714105606079	13.6870069503784	14.5429792404175	13.3256368637085	13.9263429641724	13.1108484268188	14.2345781326294	13.8896045684814	14.1599836349487	13.8792924880981	13.7768039703369	14.9813442230225	13.8356266021729	13.5864229202271	13.2407455444336	14.7683658599854	14.4589080810547	13.3093156814575					amine biosynthetic process;amine metabolic process;aspartate family amino acid biosynthetic process;aspartate family amino acid metabolic process;biosynthetic process;carboxylic acid biosynthetic process;carboxylic acid metabolic process;cellular amine metabolic process;cellular amino acid biosynthetic process;cellular amino acid metabolic process;cellular aromatic compound metabolic process;cell…	5-methyltetrahydrofolate-dependent methyltransferase activity;binding;catalytic activity;cation binding;cobalamin binding;homocysteine S-methyltransferase activity;ion binding;metal ion binding;methionine synthase activity;methyltransferase activity;S-adenosylmethionine-dependent methyltransferase activity;S-methyltransferase activity;tetrapyrrole binding;transferase activity;transferase activity…	cell part;cytoplasm;cytoplasmic part;cytosol;intracellular part	amine metabolic process;biosynthetic process;cellular amino acid metabolic process;cellular aromatic compound metabolic process;cellular ketone metabolic process;cellular metabolic process;cellular nitrogen compound metabolic process;cellular process;cofactor metabolic process;heterocycle metabolic process;metabolic process;nitrogen compound metabolic process;organic acid metabolic process;primar…	cell part;cytoplasm;cytosol	Cysteine and methionine metabolism;One carbon pool by folate;Selenocompound metabolism	B12-binding;B12-binding_2;Met_synt_B12;Pterin_bind;S-methyl_trans	ACTAYRNNNCCCR_UNKNOWN;BROWNE_HCMV_INFECTION_48HR_DN;CAIRO_HEPATOBLASTOMA_UP;CHICAS_RB1_TARGETS_SENESCENT;chr1q43;DACOSTA_UV_RESPONSE_VIA_ERCC3_DN;DIAZ_CHRONIC_MEYLOGENOUS_LEUKEMIA_UP;DODD_NASOPHARYNGEAL_CARCINOMA_DN;GATTGGY_V$NFY_Q6_01;GGAMTNNNNNTCCY_UNKNOWN;GGGCGGR_V$SP1_Q6;GSE13411_SWITCHED_MEMORY_BCELL_VS_PLASMA_CELL_UP;GSE13484_12H_VS_3H_YF17D_VACCINE_STIM_PBMC_DN;GSE14769_UNSTIM_VS_360MIN_LP…	Amino-acidbiosynthesis;Cobalamin;Cobalt;Completeproteome;Cytoplasm;Metal-binding;Methioninebiosynthesis;Methyltransferase;Referenceproteome;Repeat;S-adenosyl-L-methionine;Transferase;Zinc		GO:0000096;GO:0000097;GO:0006082;GO:0006520;GO:0006555;GO:0006725;GO:0006766;GO:0006767;GO:0006778;GO:0006790;GO:0006807;GO:0008152;GO:0008652;GO:0009058;GO:0009066;GO:0009067;GO:0009086;GO:0009235;GO:0009308;GO:0009309;GO:0009987;GO:0016053;GO:0019752;GO:0033013;GO:0034641;GO:0042180;GO:0042558;GO:0043436;GO:0044106;GO:0044237;GO:0044238;GO:0044249;GO:0044271;GO:0044272;GO:0044281;GO:0044283;GO:…	GO:0003824;GO:0005488;GO:0008168;GO:0008172;GO:0008270;GO:0008705;GO:0008757;GO:0008898;GO:0016740;GO:0016741;GO:0019842;GO:0031419;GO:0042084;GO:0043167;GO:0043169;GO:0046872;GO:0046906;GO:0046914	GO:0005737;GO:0005829;GO:0044424;GO:0044444;GO:0044464
16.8829765319824	17.2315406799316	17.5560722351074	16.7951259613037	17.3953170776367	16.5347900390625	16.8457355499268	17.2655410766602	17.0817127227783	17.4676208496094	17.611442565918	17.0660266876221	17.6773471832275	17.5930271148682	17.1625099182129	16.9439792633057	16.5967712402344	17.5136814117432	16.8283596038818	17.2016067504883	17.0462284088135	17.0583305358887	16.6305522918701	17.3778038024902	17.0612869262695	16.8984127044678	17.1036968231201	16.7832794189453	16.989372253418	17.3151321411133	17.4032459259033	17.056848526001					cellular process;membrane docking;vesicle docking;vesicle docking involved in exocytosis		cell cortex part;cell part;cytoplasmic part;exocyst;intracellular part;macromolecular complex;protein complex	cellular process;membrane docking	cell part;macromolecular complex;protein complex		Sec15	BEIER_GLIOMA_STEM_CELL_DN;BRCA1_DN.V1_DN;BROWNE_HCMV_INFECTION_12HR_DN;BRUINS_UVC_RESPONSE_VIA_TP53_GROUP_D;chr2p13;CORRE_MULTIPLE_MYELOMA_UP;DUTERTRE_ESTRADIOL_RESPONSE_24HR_DN;GSE11864_CSF1_VS_CSF1_IFNG_PAM3CYS_IN_MAC_UP;GSE13229_MATURE_VS_INTMATURE_NKCELL_DN;GSE14769_40MIN_VS_360MIN_LPS_BMDM_DN;GSE16522_MEMORY_VS_NAIVE_CD8_TCELL_UP;GSE24634_IL4_VS_CTRL_TREATED_NAIVE_CD4_TCELL_DAY7_DN;GSE31082_…	Alternativesplicing;Coiledcoil;Completeproteome;Referenceproteome		GO:0006904;GO:0009987;GO:0022406;GO:0048278		GO:0000145;GO:0032991;GO:0043234;GO:0044424;GO:0044444;GO:0044448;GO:0044464
13.4309158325195	14.231632232666	14.0967864990234	15.2705507278442	15.7496862411499	13.4785871505737	14.0285835266113	13.9086132049561	15.0401048660278	15.6314611434937	13.5666723251343	14.0259275436401	14.2359647750854	13.2623596191406	14.3048944473267	13.5306415557861	15.5288200378418	14.1222257614136	13.4532051086426	14.4034757614136	14.5772495269775	13.8592195510864	15.0489797592163	13.7325506210327	13.6445837020874	14.3745584487915	14.3023147583008	15.8452453613281	13.3257751464844	14.1106061935425	14.5531244277954	13.3282279968262						binding;catalytic activity;cation binding;endopeptidase activity;hydrolase activity;ion binding;metal ion binding;metalloendopeptidase activity;metallopeptidase activity;peptidase activity;peptidase activity, acting on L-amino acid peptides	cell part;cytoplasmic part;intracellular membrane-bounded organelle;intracellular organelle;intracellular organelle lumen;intracellular organelle part;intracellular part;membrane-bounded organelle;membrane-enclosed lumen;mitochondrial matrix;mitochondrial part;mitochondrion;organelle;organelle lumen;organelle part		cell part;intracellular membrane-bounded organelle;intracellular organelle;mitochondrion;organelle		Peptidase_M3	BIOPOLYMER_METABOLIC_PROCESS;BIOPOLYMER_MODIFICATION;BLUM_RESPONSE_TO_SALIRASIB_DN;BROWNE_HCMV_INFECTION_14HR_DN;BRUINS_UVC_RESPONSE_LATE;BRUINS_UVC_RESPONSE_VIA_TP53_GROUP_B;CAGGTG_V$E12_Q6;CELLULAR_LOCALIZATION;CELLULAR_MACROMOLECULE_METABOLIC_PROCESS;CELLULAR_PROTEIN_METABOLIC_PROCESS;chr13q12;CREIGHTON_ENDOCRINE_THERAPY_RESISTANCE_5;CYTOPLASM;CYTOPLASMIC_PART;DIAZ_CHRONIC_MEYLOGENOUS_LEUKEMIA…	Acetylation;Calcium;Cobalt;Completeproteome;Hydrolase;Iron;Magnesium;Manganese;Metal-binding;Metalloprotease;Mitochondrion;Protease;Referenceproteome;Transitpeptide;Zinc			GO:0003824;GO:0004175;GO:0004222;GO:0005488;GO:0008233;GO:0008237;GO:0016787;GO:0043167;GO:0043169;GO:0046872;GO:0070011	GO:0005739;GO:0005759;GO:0031974;GO:0043226;GO:0043227;GO:0043229;GO:0043231;GO:0043233;GO:0044422;GO:0044424;GO:0044429;GO:0044444;GO:0044446;GO:0044464;GO:0070013
14.2966337203979	14.8848857879639	15.2662744522095	14.9451236724854	14.7489261627197	15.1193056106567	14.4882793426514	13.9573049545288	14.1069850921631	15.5884799957275	14.998854637146	14.9825925827026	14.8168487548828	14.4335775375366	14.5352754592896	12.9884481430054	14.2850408554077	15.2789745330811	13.4765453338623	13.7195796966553	14.0446834564209	15.1030006408691	15.3710279464722	13.411039352417	15.2054300308228	14.5690088272095	13.1359767913818	13.7406778335571	14.501030921936	15.5883340835571	14.6696605682373	14.9987668991089					biological regulation;cellular macromolecule metabolic process;cellular metabolic process;cellular process;cellular protein metabolic process;cellular response to stimulus;cellular response to stress;macromolecule metabolic process;macromolecule methylation;macromolecule modification;metabolic process;methylation;one-carbon metabolic process;primary metabolic process;protein alkylation;protein me…	carboxyl-O-methyltransferase activity;catalytic activity;methyltransferase activity;O-methyltransferase activity;protein carboxyl O-methyltransferase activity;protein methyltransferase activity;S-adenosylmethionine-dependent methyltransferase activity;transferase activity;transferase activity, transferring one-carbon groups		biological regulation;cellular metabolic process;cellular process;macromolecule metabolic process;macromolecule modification;metabolic process;one-carbon metabolic process;primary metabolic process;protein alkylation;protein metabolic process;protein modification process;response to DNA damage stimulus;response to stimulus;response to stress;small molecule metabolic process			DUF89		Acetylation;Alternativesplicing;Completeproteome;DNAdamage;Methylation;Methyltransferase;Referenceproteome;S-adenosyl-L-methionine;Transferase		GO:0006464;GO:0006479;GO:0006730;GO:0006950;GO:0006974;GO:0008152;GO:0008213;GO:0009987;GO:0019538;GO:0032259;GO:0033554;GO:0043170;GO:0043412;GO:0043414;GO:0044237;GO:0044238;GO:0044260;GO:0044267;GO:0044281;GO:0048583;GO:0050789;GO:0050794;GO:0050896;GO:0051716;GO:0065007;GO:0080134;GO:0080135;GO:2001020	GO:0003824;GO:0008168;GO:0008171;GO:0008276;GO:0008757;GO:0010340;GO:0016740;GO:0016741;GO:0051998
15.1121139526367	14.0094785690308	15.2450695037842	14.2175035476685	14.0579566955566	14.7102680206299	13.7960538864136	15.3782272338867	13.5922088623047	13.5415849685669	13.9893941879272	14.1270599365234	13.8727712631226	13.8911190032959	14.4704637527466	15.28395652771	14.9942646026611	13.4103870391846	14.192138671875	13.7672882080078	14.0707921981812	14.5572242736816	14.4374408721924	13.4165334701538	15.1027545928955	13.6636352539063	13.7710199356079	13.9123287200928	14.2750949859619	14.0066766738892	13.5375108718872	14.9964723587036					anatomical structure development;biological regulation;cell development;cellular developmental process;cellular process;developmental process;megakaryocyte development;positive regulation of catalytic activity;positive regulation of GTPase activity;positive regulation of hydrolase activity;positive regulation of molecular function;regulation of biological process;regulation of catabolic process;r…	binding;enzyme activator activity;enzyme binding;enzyme regulator activity;GTPase activator activity;GTPase binding;GTPase regulator activity;nucleoside-triphosphatase regulator activity;protein binding;Rab GTPase binding;Ras GTPase binding;small GTPase binding	cell part;cytoplasmic part;early endosome;endosome;Golgi apparatus;intracellular membrane-bounded organelle;intracellular organelle;intracellular part;membrane-bounded organelle;nucleus;organelle	anatomical structure development;biological regulation;cell development;cellular process;developmental process	cell part;endosome;Golgi apparatus;intracellular membrane-bounded organelle;intracellular organelle;nucleus;organelle		DUF3694;PID;RabGAP-TBC	BACOLOD_RESISTANCE_TO_ALKYLATING_AGENTS_UP;BAELDE_DIABETIC_NEPHROPATHY_DN;BENPORATH_ES_1;BIDUS_METASTASIS_UP;BOQUEST_STEM_CELL_CULTURED_VS_FRESH_UP;BROWNE_HCMV_INFECTION_12HR_DN;BROWNE_HCMV_INFECTION_20HR_DN;BROWNE_HCMV_INFECTION_20HR_UP;BROWNE_HCMV_INFECTION_30MIN_DN;BROWNE_HCMV_INFECTION_4HR_DN;BROWNE_INTERFERON_RESPONSIVE_GENES;BRUINS_UVC_RESPONSE_VIA_TP53_GROUP_C;CHEN_LIVER_METABOLISM_QTL_CIS…	Alternativesplicing;Completeproteome;GTPaseactivation;Phosphoprotein;Referenceproteome		GO:0006140;GO:0009894;GO:0009987;GO:0019219;GO:0019222;GO:0030811;GO:0031323;GO:0031329;GO:0032502;GO:0032879;GO:0032880;GO:0033121;GO:0033124;GO:0035855;GO:0043085;GO:0043087;GO:0043547;GO:0044093;GO:0048468;GO:0048856;GO:0048869;GO:0050789;GO:0050790;GO:0050794;GO:0051171;GO:0051336;GO:0051345;GO:0065007;GO:0065009;GO:0080090	GO:0005096;GO:0005488;GO:0005515;GO:0008047;GO:0017016;GO:0017137;GO:0019899;GO:0030234;GO:0030695;GO:0031267;GO:0051020;GO:0060589	GO:0005634;GO:0005768;GO:0005769;GO:0005794;GO:0043226;GO:0043227;GO:0043229;GO:0043231;GO:0044424;GO:0044444;GO:0044464
14.9429187774658	14.5086784362793	14.0425539016724	13.6318407058716	14.2696933746338	14.0743570327759	13.8203744888306	13.8350734710693	14.4562215805054	14.252290725708	13.8872308731079	14.650673866272	13.5300178527832	14.474702835083	14.0707654953003	13.4014015197754	12.8812065124512	13.4595279693604	13.7726726531982	14.6961402893066	13.1875476837158	12.8570737838745	14.6485214233398	14.9764957427979	14.1929445266724	14.7419414520264	14.0553159713745	13.8501577377319	13.7718877792358	13.6892194747925	14.8490533828735	14.9935121536255					cellular macromolecule metabolic process;cellular metabolic process;cellular process;cellular protein metabolic process;macromolecule metabolic process;macromolecule modification;metabolic process;primary metabolic process;protein metabolic process;protein modification by small protein conjugation;protein modification by small protein conjugation or removal;protein modification process;protein ub…	acid-amino acid ligase activity;catalytic activity;ligase activity;ligase activity, forming carbon-nitrogen bonds;small conjugating protein ligase activity;ubiquitin-protein ligase activity	cell part;cytoplasm;intracellular membrane-bounded organelle;intracellular organelle;intracellular part;membrane-bounded organelle;nucleus;organelle	cellular metabolic process;cellular process;macromolecule metabolic process;macromolecule modification;metabolic process;primary metabolic process;protein metabolic process;protein modification by small protein conjugation or removal;protein modification process	cell part;cytoplasm;intracellular membrane-bounded organelle;intracellular organelle;nucleus;organelle	Ubiquitin mediated proteolysis	HECT;RCC1	ATGAAGG,MIR-205;BROWNE_HCMV_INFECTION_1HR_DN;chr4q21;DUTERTRE_ESTRADIOL_RESPONSE_24HR_DN;GARY_CD5_TARGETS_UP;GSE13484_UNSTIM_VS_12H_YF17D_VACCINE_STIM_PBMC_UP;GSE16522_MEMORY_VS_NAIVE_ANTI_CD3CD28_STIM_CD8_TCELL_UP;GSE22886_NAIVE_BCELL_VS_BLOOD_PLASMA_CELL_UP;GSE22886_TH1_VS_TH2_48H_ACT_DN;GSE2706_R848_VS_R848_AND_LPS_2H_STIM_DC_UP;GSE30962_PRIMARY_VS_SECONDARY_ACUTE_LCMV_INF_CD8_TCELL_DN;GSE360_…	Completeproteome;Ligase;Proteomicsidentification;Referenceproteome;Repeat;Ublconjugationpathway		GO:0006464;GO:0008152;GO:0009987;GO:0016567;GO:0019538;GO:0032446;GO:0042787;GO:0043170;GO:0043412;GO:0044237;GO:0044238;GO:0044260;GO:0044267;GO:0070647	GO:0003824;GO:0004842;GO:0016874;GO:0016879;GO:0016881;GO:0019787	GO:0005634;GO:0005737;GO:0043226;GO:0043227;GO:0043229;GO:0043231;GO:0044424;GO:0044464
14.3361825942993	13.2066764831543	13.1513957977295	13.5027627944946	13.3645677566528	13.2479562759399	13.8548746109009	13.5497064590454	14.2379474639893	12.9862117767334	13.4837417602539	13.9411602020264	13.52867603302	14.7234621047974	14.1085548400879	12.8726444244385	13.9173622131348	13.8147525787354	13.856011390686	14.1573801040649	14.5515537261963	14.8079528808594	12.8984212875366	13.3318462371826	13.702410697937	13.699333190918	14.8507652282715	13.0625514984131	13.5409574508667	13.7755165100098	13.4039754867554	14.7511892318726					cation transport;cellular component assembly;cellular component organization;cellular component organization or biogenesis;cellular potassium ion transport;cellular process;establishment of localization;ion transmembrane transport;ion transport;macromolecular complex assembly;macromolecular complex subunit organization;metal ion transport;monovalent inorganic cation transport;potassium ion transm…	cation channel activity;cation transmembrane transporter activity;channel activity;delayed rectifier potassium channel activity;gated channel activity;ion channel activity;ion transmembrane transporter activity;passive transmembrane transporter activity;potassium channel activity;substrate-specific channel activity;substrate-specific transmembrane transporter activity;substrate-specific transport…	cation channel complex;cell part;integral to membrane;intrinsic to membrane;ion channel complex;macromolecular complex;membrane part;plasma membrane part;potassium channel complex;protein complex;voltage-gated potassium channel complex	cellular component assembly;cellular component organization;cellular process;establishment of localization;ion transport;macromolecular complex assembly;protein complex assembly;transmembrane transport;transport	cell part;macromolecular complex;protein complex		BTB_2;Ion_trans;Kv2channel	AAGCAAT,MIR-137;BRCA1_DN.V1_UP;CAGGTG_V$E12_Q6;CATION_CHANNEL_ACTIVITY;CATION_TRANSMEMBRANE_TRANSPORTER_ACTIVITY;CATION_TRANSPORT;chr8q13;CTIP_DN.V1_UP;CTTTGT_V$LEF1_Q2;DELAYED_RECTIFIER_POTASSIUM_CHANNEL_ACTIVITY;ENK_UV_RESPONSE_KERATINOCYTE_UP;ESTABLISHMENT_OF_LOCALIZATION;GATED_CHANNEL_ACTIVITY;GGGAGGRR_V$MAZ_Q6;GSE12366_NAIVE_VS_MEMORY_BCELL_UP;GSE360_CTRL_VS_T_GONDII_MAC_UP;GSE360_DC_VS_MAC_…	Completeproteome;Glycoprotein;Ionchannel;Iontransport;Membrane;Phosphoprotein;Potassium;Potassiumchannel;Potassiumtransport;Referenceproteome;Transmembrane;Transmembranehelix;Transport;Voltage-gatedchannel		GO:0006461;GO:0006810;GO:0006811;GO:0006812;GO:0006813;GO:0009987;GO:0015672;GO:0016043;GO:0022607;GO:0030001;GO:0034220;GO:0043933;GO:0051234;GO:0051259;GO:0051260;GO:0055085;GO:0065003;GO:0071804;GO:0071805;GO:0071822;GO:0071840	GO:0005215;GO:0005216;GO:0005244;GO:0005249;GO:0005251;GO:0005261;GO:0005267;GO:0008324;GO:0015075;GO:0015267;GO:0022803;GO:0022832;GO:0022836;GO:0022838;GO:0022843;GO:0022857;GO:0022891;GO:0022892	GO:0008076;GO:0016021;GO:0031224;GO:0032991;GO:0034702;GO:0034703;GO:0034705;GO:0043234;GO:0044425;GO:0044459;GO:0044464
13.1886281967163	13.9088115692139	12.5363330841064	14.217396736145	13.9167823791504	13.4906797409058	13.7274293899536	14.654221534729	13.3038139343262	13.3736543655396	14.1563692092896	15.1639099121094	14.3882465362549	14.2887258529663	13.853572845459	14.2635688781738	14.0956325531006	13.7232007980347	13.9722213745117	14.7951583862305	13.5467376708984	12.8633480072021	13.1757707595825	14.4192457199097	14.5922012329102	14.5154733657837	13.393611907959	13.3265724182129	13.9960556030273	13.6019830703735	14.739203453064	13.8521318435669					biological regulation;cellular process;cellular response to stimulus;intracellular signal transduction;positive regulation of catalytic activity;positive regulation of GTPase activity;positive regulation of hydrolase activity;positive regulation of molecular function;regulation of biological process;regulation of catabolic process;regulation of catalytic activity;regulation of cellular catabolic …	binding;enzyme activator activity;enzyme regulator activity;GTPase activator activity;GTPase regulator activity;nucleoside-triphosphatase regulator activity;protein binding;protein domain specific binding;SH3 domain binding	adherens junction;anchoring junction;cell junction;cell part;cell projection;cell-substrate adherens junction;cell-substrate junction;focal adhesion;intracellular;lamellipodium	biological regulation;cellular process;response to stimulus;signal transduction	cell part;cell projection;intracellular		RhoGAP	CCTGCTG,MIR-214;chr3q13;CUI_TCF21_TARGETS_2_DN;GRAESSMANN_APOPTOSIS_BY_DOXORUBICIN_DN;GSE13229_MATURE_VS_INTMATURE_NKCELL_DN;GSE13485_CTRL_VS_DAY3_YF17D_VACCINE_PBMC_DN;GSE13485_DAY3_VS_DAY21_YF17D_VACCINE_PBMC_UP;GSE13485_DAY7_VS_DAY21_YF17D_VACCINE_PBMC_UP;GSE14769_UNSTIM_VS_240MIN_LPS_BMDM_DN;GSE15750_DAY6_VS_DAY10_EFF_CD8_TCELL_DN;GSE17721_0.5H_VS_8H_PAM3CSK4_BMDM_UP;GSE17721_LPS_VS_GARDIQUIM…	Celljunction;Cellprojection;Completeproteome;GTPaseactivation;Phosphoprotein;Referenceproteome		GO:0006140;GO:0007165;GO:0007264;GO:0009894;GO:0009987;GO:0019219;GO:0019222;GO:0030811;GO:0031323;GO:0031329;GO:0033121;GO:0033124;GO:0035556;GO:0043085;GO:0043087;GO:0043547;GO:0044093;GO:0050789;GO:0050790;GO:0050794;GO:0050896;GO:0051171;GO:0051336;GO:0051345;GO:0051716;GO:0065007;GO:0065009;GO:0080090	GO:0005096;GO:0005488;GO:0005515;GO:0008047;GO:0017124;GO:0019904;GO:0030234;GO:0030695;GO:0060589	GO:0005622;GO:0005912;GO:0005924;GO:0005925;GO:0030027;GO:0030054;GO:0030055;GO:0042995;GO:0044464;GO:0070161
13.6936206817627	13.4313802719116	14.2214441299438	14.8775768280029	13.9200439453125	14.9210720062256	14.3763408660889	14.1286182403564	13.3045959472656	13.7270784378052	14.0175371170044	14.129861831665	14.4961109161377	14.4797744750977	14.4341983795166	14.3048524856567	13.9187726974487	15.1781454086304	13.5042266845703	13.8317489624023	13.903413772583	15.1349039077759	14.2977828979492	14.0150232315063	14.0871143341064	13.3338575363159	14.3339319229126	13.8389892578125	14.9651136398315	13.2744140625	13.9386520385742	13.7275438308716					alcohol metabolic process;amine metabolic process;anatomical structure morphogenesis;anion homeostasis;benzene-containing compound metabolic process;biological regulation;cardiac chamber morphogenesis;cardiac left ventricle morphogenesis;cardiac ventricle morphogenesis;catecholamine metabolic process;catechol-containing compound metabolic process;cellular amine metabolic process;cellular aromatic…	catalytic activity;oxidoreductase activity	extracellular region part;extracellular space	alcohol metabolic process;amine metabolic process;anatomical structure morphogenesis;biological regulation;cellular aromatic compound metabolic process;cellular metabolic process;cellular nitrogen compound metabolic process;cellular process;circulatory system process;developmental process;homeostatic process;metabolic process;multicellular organismal process;nitrogen compound metabolic process;re…	extracellular space		Amino_oxidase	CSR_LATE_UP.V1_DN;FORTSCHEGGER_PHF8_TARGETS_UP;GSE11864_CSF1_IFNG_VS_CSF1_PAM3CYS_IN_MAC_UP;GSE11864_CSF1_VS_CSF1_IFNG_IN_MAC_DN;GSE11864_UNTREATED_VS_CSF1_IN_MAC_UP;GSE13229_MATURE_VS_INTMATURE_NKCELL_UP;GSE13411_NAIVE_VS_SWITCHED_MEMORY_BCELL_UP;GSE14000_TRANSLATED_RNA_VS_MRNA_16H_LPS_DC_UP;GSE14000_TRANSLATED_RNA_VS_MRNA_4H_LPS_DC_UP;GSE3982_EFF_MEMORY_VS_CENT_MEMORY_CD4_TCELL_UP;GSE3982_MAST_…	Alternativesplicing;Completeproteome;FAD;Flavoprotein;NAD;NADP;Oxidoreductase;Referenceproteome;Secreted;Signal		GO:0003008;GO:0003013;GO:0003015;GO:0003073;GO:0003206;GO:0003208;GO:0003214;GO:0006066;GO:0006576;GO:0006584;GO:0006725;GO:0006807;GO:0008152;GO:0008217;GO:0009308;GO:0009653;GO:0009712;GO:0009719;GO:0009987;GO:0010033;GO:0010243;GO:0014075;GO:0018958;GO:0032501;GO:0032502;GO:0034311;GO:0034641;GO:0042221;GO:0042414;GO:0042415;GO:0042417;GO:0042537;GO:0042592;GO:0044106;GO:0044237;GO:0044281;GO:…	GO:0003824;GO:0016491	GO:0005615;GO:0044421
13.6643848419189	13.9858884811401	14.3681030273438	14.6614446640015	13.1428689956665	13.3784942626953	13.8297729492188	13.7252416610718	14.9074840545654	12.7360153198242	13.8779773712158	13.2522411346436	12.7823143005371	14.1101341247559	14.50816822052	13.4462413787842	14.383373260498	15.245005607605	14.1698217391968	13.7331552505493	13.6840991973877	13.9331645965576	13.7828779220581	13.7425298690796	13.4525089263916	13.5226554870605	15.1478815078735	12.5559511184692	13.5179634094238	14.6839303970337	14.3902530670166	15.1960716247559	+										DUF2428	ATGTCAC,MIR-489;AUNG_GASTRIC_CANCER;chr2p21;CHYLA_CBFA2T3_TARGETS_UP;CTCTGGA,MIR-520A,MIR-525;GARY_CD5_TARGETS_DN;GGCAGCT,MIR-22;GGGACCA,MIR-133A,MIR-133B;GSE13484_12H_VS_3H_YF17D_VACCINE_STIM_PBMC_UP;GSE13484_UNSTIM_VS_3H_YF17D_VACCINE_STIM_PBMC_UP;GSE1460_INTRATHYMIC_T_PROGENITOR_VS_THYMIC_STROMAL_CELL_UP;GSE1460_NAIVE_CD4_TCELL_CORD_BLOOD_VS_THYMIC_STROMAL_CELL_UP;GSE15750_WT_VS_TRAF6KO_DAY6_E…	Alternativesplicing;Coiledcoil;Completeproteome;Phosphoprotein;Referenceproteome
14.396824836731	14.029483795166	13.6737508773804	12.4804334640503	15.121301651001	14.2382411956787	14.0051870346069	13.527286529541	13.7438325881958	14.2076683044434	13.1183738708496	13.5432500839233	13.56263256073	14.1916818618774	13.4787950515747	12.4923124313354	15.1135358810425	14.0457029342651	13.8151159286499	14.5635824203491	14.1603479385376	14.5176429748535	14.2074289321899	14.9305639266968	14.625563621521	14.0995922088623	14.3848428726196	13.8546485900879	13.6482009887695	13.7698783874512	14.07737159729	13.9203681945801						binding;cation binding;heme binding;ion binding;iron ion binding;metal ion binding;oxygen binding;oxygen transporter activity;substrate-specific transporter activity;tetrapyrrole binding;transition metal ion binding;transporter activity	cell part;cytoplasmic part;cytosolic part;hemoglobin complex;intracellular part;macromolecular complex;protein complex		cell part;macromolecular complex;protein complex		Globin		Completeproteome;Heme;Iron;Metal-binding;Oxygentransport;Proteomicsidentification;Referenceproteome;Transport			GO:0005215;GO:0005344;GO:0005488;GO:0005506;GO:0019825;GO:0020037;GO:0022892;GO:0043167;GO:0043169;GO:0046872;GO:0046906;GO:0046914	GO:0005833;GO:0032991;GO:0043234;GO:0044424;GO:0044444;GO:0044445;GO:0044464
13.2074270248413	13.3792953491211	14.1939907073975	13.4219312667847	13.2798824310303	13.8022632598877	13.0681571960449	15.5161714553833	13.8759870529175	14.1137943267822	14.4231281280518	13.6712646484375	14.3330450057983	13.8205404281616	14.0032396316528	14.5855464935303	13.2685956954956	13.0813646316528	14.2055997848511	15.0583372116089	12.6864995956421	13.5130558013916	13.2555322647095	14.0740509033203	13.669677734375	14.3901348114014	14.5090427398682	13.4195909500122	14.5293264389038	13.5453910827637	14.1162242889404	14.0962324142456					aggressive behavior;anatomical structure development;behavior;behavioral interaction between organisms;biological adhesion;biological regulation;brainstem development;cell adhesion;cellular chemical homeostasis;cellular component assembly;cellular component assembly at cellular level;cellular component organization;cellular component organization at cellular level;cellular component organization …	binding;neurexin family protein binding;protein binding	cell junction;cell part;cell projection;cell surface;dendrite;excitatory synapse;integral to membrane;integral to plasma membrane;intrinsic to membrane;intrinsic to plasma membrane;membrane;membrane part;neuron projection;plasma membrane;plasma membrane part;postsynaptic membrane;synapse;synapse part;synaptic membrane	anatomical structure development;behavior;behavioral interaction between organisms;biological adhesion;biological regulation;cell adhesion;cellular component assembly;cellular component organization;cellular homeostasis;cellular ion homeostasis;cellular membrane organization;cellular process;developmental process;growth;homeostatic process;membrane organization;multicellular organismal process;mu…	cell part;cell projection;cell surface;membrane;neuron projection;plasma membrane;synapse		COesterase		Celljunction;Cellmembrane;Completeproteome;Disulfidebond;Membrane;Postsynapticcellmembrane;Referenceproteome;Signal;Synapse;Transmembrane;Transmembranehelix		GO:0002118;GO:0002124;GO:0003360;GO:0006873;GO:0007155;GO:0007416;GO:0007610;GO:0008049;GO:0009987;GO:0016043;GO:0016044;GO:0019098;GO:0019725;GO:0021549;GO:0022414;GO:0022607;GO:0022610;GO:0032501;GO:0032502;GO:0033057;GO:0035176;GO:0035265;GO:0040007;GO:0042391;GO:0042592;GO:0045837;GO:0048609;GO:0048856;GO:0048878;GO:0050801;GO:0050808;GO:0050896;GO:0051704;GO:0051705;GO:0051899;GO:0055082;GO:…	GO:0005488;GO:0005515;GO:0042043	GO:0005886;GO:0005887;GO:0009986;GO:0016020;GO:0016021;GO:0030054;GO:0030425;GO:0031224;GO:0031226;GO:0042995;GO:0043005;GO:0044425;GO:0044456;GO:0044459;GO:0044464;GO:0045202;GO:0045211;GO:0060076;GO:0097060
19.8401050567627	19.2771472930908	19.2155857086182	19.4161701202393	19.1075592041016	19.1879272460938	19.464714050293	19.2688579559326	19.4217491149902	19.0498485565186	19.2351684570313	19.3307075500488	19.453182220459	19.625280380249	19.0607070922852	19.4168930053711	19.9961757659912	19.4196319580078	18.8431911468506	19.1613292694092	19.1685199737549	19.2879371643066	19.1266136169434	19.4452819824219	19.4688339233398	19.3601818084717	18.8960781097412	19.1548175811768	19.7350940704346	18.774845123291	19.2617835998535	18.6164779663086					anatomical structure development;biological adhesion;cell adhesion;cellular macromolecule metabolic process;cellular metabolic process;cellular process;cellular protein metabolic process;cerebellum development;cerebral cortex development;corpus callosum development;dephosphorylation;developmental process;hippocampus development;macromolecule metabolic process;macromolecule modification;metabolic …	catalytic activity;hydrolase activity;hydrolase activity, acting on ester bonds;phosphatase activity;phosphoprotein phosphatase activity;phosphoric ester hydrolase activity;protein tyrosine phosphatase activity	cell part;extracellular membrane-bounded organelle;extracellular organelle;extracellular region part;extracellular vesicular exosome;integral to membrane;intrinsic to membrane;membrane part;membrane-bounded organelle;membrane-bounded vesicle;organelle;vesicle	anatomical structure development;biological adhesion;cell adhesion;cellular metabolic process;cellular process;developmental process;macromolecule metabolic process;macromolecule modification;metabolic process;phosphorus metabolic process;primary metabolic process;protein dephosphorylation;protein metabolic process;protein modification process	cell part;extracellular organelle;organelle;vesicle		fn3;I-set;Y_phosphatase	BONOME_OVARIAN_CANCER_SURVIVAL_SUBOPTIMAL_DEBULKING;BOYLAN_MULTIPLE_MYELOMA_C_D_UP;BRCA1_DN.V1_UP;BRUINS_UVC_RESPONSE_LATE;CAGCTG_V$AP4_Q5;CAIRO_LIVER_DEVELOPMENT_UP;chr19p13;DELACROIX_RARG_BOUND_MEF;FIGUEROA_AML_METHYLATION_CLUSTER_1_DN;FIGUEROA_AML_METHYLATION_CLUSTER_4_DN;GOLDRATH_NAIVE_VS_MEMORY_CD8_TCELL_UP;GRAESSMANN_APOPTOSIS_BY_DOXORUBICIN_DN;GRAESSMANN_RESPONSE_TO_MC_AND_DOXORUBICIN_DN;G…	3D-structure;Alternativesplicing;Celladhesion;Completeproteome;Disulfidebond;Glycoprotein;Hydrolase;Immunoglobulindomain;Membrane;Proteinphosphatase;Receptor;Referenceproteome;Repeat;Signal;Transmembrane;Transmembranehelix		GO:0006464;GO:0006470;GO:0006793;GO:0006796;GO:0007155;GO:0008152;GO:0009987;GO:0016311;GO:0019538;GO:0021510;GO:0021549;GO:0021766;GO:0021987;GO:0022038;GO:0022610;GO:0032502;GO:0035335;GO:0043170;GO:0043412;GO:0044237;GO:0044238;GO:0044260;GO:0044267;GO:0048856	GO:0003824;GO:0004721;GO:0004725;GO:0016787;GO:0016788;GO:0016791;GO:0042578	GO:0016021;GO:0031224;GO:0031982;GO:0031988;GO:0043226;GO:0043227;GO:0043230;GO:0044421;GO:0044425;GO:0044464;GO:0065010;GO:0070062
12.8273477554321	13.625168800354	14.373272895813	16.3088893890381	14.4412870407104	16.2011852264404	15.0497636795044	13.786940574646	14.7107906341553	14.7942638397217	13.8505830764771	14.0816345214844	15.1506023406982	15.1159315109253	13.5948915481567	14.0790357589722	14.5850801467896	14.0108623504639	15.1501436233521	14.2948112487793	14.3960037231445	13.3895893096924	14.5785789489746	13.24436378479	14.4305696487427	14.8790092468262	14.0169162750244	13.2116861343384	13.5065755844116	13.4060716629028	14.8977651596069	13.7883129119873						2 iron, 2 sulfur cluster binding;binding;cation binding;ion binding;iron-sulfur cluster binding;metal cluster binding;metal ion binding	cell part;cytoplasmic part;intracellular membrane-bounded organelle;intracellular organelle;intracellular part;membrane-bounded organelle;mitochondrion;organelle		cell part;intracellular membrane-bounded organelle;intracellular organelle;mitochondrion;organelle		zf-CDGSH	BRUINS_UVC_RESPONSE_VIA_TP53_GROUP_B;chr17q12;GSE10239_NAIVE_VS_KLRG1INT_EFF_CD8_TCELL_DN;GSE12366_NAIVE_VS_MEMORY_BCELL_DN;GSE13493_CD4INTCD8POS_VS_CD8POS_THYMOCYTE_DN;GSE14000_TRANSLATED_RNA_VS_MRNA_DC_DN;GSE14308_TH1_VS_NAIVE_CD4_TCELL_UP;GSE14308_TH17_VS_NAIVE_CD4_TCELL_UP;GSE14308_TH17_VS_NATURAL_TREG_UP;GSE14308_TH2_VS_NAIVE_CD4_TCELL_UP;GSE14308_TH2_VS_NATURAL_TREG_UP;GSE2706_R848_VS_R848_…	2Fe-2S;Acetylation;Completeproteome;Iron;Iron-sulfur;Metal-binding;Mitochondrion;Referenceproteome;Transitpeptide			GO:0005488;GO:0043167;GO:0043169;GO:0046872;GO:0051536;GO:0051537;GO:0051540	GO:0005739;GO:0043226;GO:0043227;GO:0043229;GO:0043231;GO:0044424;GO:0044444;GO:0044464
13.4270448684692	14.0082445144653	14.0147180557251	13.958384513855	13.1173601150513	13.8456630706787	13.3589887619019	14.0845060348511	12.958194732666	13.6085758209229	12.9809322357178	14.0105752944946	14.6308565139771	13.9452056884766	15.5319604873657	13.9323377609253	13.7127418518066	13.2066783905029	14.3259134292603	15.1566791534424	13.3970012664795	13.9402017593384	14.7644262313843	14.186014175415	14.0036668777466	13.7294998168945	14.7022361755371	13.5804405212402	13.4631299972534	13.1576681137085	13.4940767288208	14.6683340072632					biological regulation;cellular component organization;cellular component organization at cellular level;cellular component organization or biogenesis;cellular component organization or biogenesis at cellular level;cellular process;centrosome organization;chromatin assembly or disassembly;chromatin organization;chromosome organization;cytoskeleton organization;microtubule cytoskeleton organization…	adenyl nucleotide binding;adenyl ribonucleotide binding;ATP binding;ATPase activity;ATPase activity, coupled;ATP-dependent helicase activity;binding;catalytic activity;cation binding;DNA binding;helicase activity;hydrolase activity;hydrolase activity, acting on acid anhydrides;hydrolase activity, acting on acid anhydrides, in phosphorus-containing anhydrides;ion binding;metal ion binding;nucleic …	cell part;centrosome;chromatin remodeling complex;cytoplasm;cytoplasmic part;cytoskeletal part;cytoskeleton;histone deacetylase complex;intermediate filament cytoskeleton;intracellular membrane-bounded organelle;intracellular non-membrane-bounded organelle;intracellular organelle;intracellular organelle part;intracellular part;macromolecular complex;membrane-bounded organelle;microtubule organizi…	biological regulation;cellular component organization;cellular process;chromatin organization;chromosome organization;cytoskeleton organization;microtubule organizing center organization;organelle organization	cell part;centrosome;chromatin remodeling complex;cytoplasm;cytoskeleton;intracellular membrane-bounded organelle;intracellular non-membrane-bounded organelle;intracellular organelle;macromolecular complex;microtubule organizing center;nucleolus;nucleus;organelle;protein complex;transcriptional repressor complex		CHDCT2;CHDNT;Chromo;DUF1086;DUF1087;Helicase_C;PHD;SNF2_N	ASGHARZADEH_NEUROBLASTOMA_POOR_SURVIVAL_DN;ATP_DEPENDENT_DNA_HELICASE_ACTIVITY;ATP_DEPENDENT_HELICASE_ACTIVITY;ATPASE_ACTIVITY;ATPASE_ACTIVITY_COUPLED;BAELDE_DIABETIC_NEPHROPATHY_DN;BIOPOLYMER_METABOLIC_PROCESS;CAGGGTC,MIR-504;chr17p13;DNA_BINDING;DNA_DEPENDENT_ATPASE_ACTIVITY;DNA_HELICASE_ACTIVITY;DOUGLAS_BMI1_TARGETS_UP;FLECHNER_PBL_KIDNEY_TRANSPLANT_OK_VS_DONOR_UP;GOBERT_OLIGODENDROCYTE_DIFFER…	Completeproteome;Metal-binding;Nucleus;Proteomicsidentification;Referenceproteome;Zinc;Zinc-finger		GO:0000226;GO:0006325;GO:0006333;GO:0006355;GO:0006996;GO:0007010;GO:0007017;GO:0007051;GO:0009889;GO:0009987;GO:0010468;GO:0010556;GO:0016043;GO:0019219;GO:0019222;GO:0031023;GO:0031323;GO:0031326;GO:0050789;GO:0050794;GO:0051171;GO:0051252;GO:0051276;GO:0051297;GO:0060255;GO:0065007;GO:0071840;GO:0071841;GO:0071842;GO:0080090;GO:2000112	GO:0000166;GO:0003676;GO:0003677;GO:0003824;GO:0004386;GO:0005488;GO:0005524;GO:0008026;GO:0008270;GO:0016462;GO:0016787;GO:0016817;GO:0016818;GO:0016887;GO:0017076;GO:0017111;GO:0030554;GO:0032553;GO:0032555;GO:0032559;GO:0035639;GO:0042623;GO:0043167;GO:0043169;GO:0046872;GO:0046914;GO:0070035	GO:0000118;GO:0005634;GO:0005730;GO:0005737;GO:0005813;GO:0005815;GO:0005856;GO:0016581;GO:0016585;GO:0017053;GO:0032991;GO:0043226;GO:0043227;GO:0043228;GO:0043229;GO:0043231;GO:0043232;GO:0043234;GO:0044422;GO:0044424;GO:0044428;GO:0044430;GO:0044444;GO:0044446;GO:0044451;GO:0044464;GO:0045111
14.7327499389648	15.6759023666382	16.3645629882813	16.6092357635498	16.0691146850586	14.0093040466309	16.2390766143799	15.9438886642456	15.3931226730347	16.1474227905273	15.0289850234985	14.8232679367065	15.4729766845703	15.5317468643188	15.5399770736694	16.2625541687012	16.3791580200195	16.2620944976807	16.4728813171387	15.4105176925659	15.7227010726929	15.3506288528442	15.8448524475098	14.8182325363159	14.8970422744751	15.7704315185547	15.5532989501953	13.1830177307129	14.6521730422974	15.3989772796631	15.5023031234741	14.7092142105103					biological regulation;cellular process;establishment of localization;establishment of localization in cell;establishment of protein localization;establishment of protein localization to organelle;establishment of protein localization to vacuole;intracellular protein transport;intracellular transport;maintenance of location;maintenance of location in cell;maintenance of protein location;maintenanc…		cell part;extracellular membrane-bounded organelle;extracellular organelle;extracellular region part;extracellular vesicular exosome;extrinsic to membrane;intracellular;membrane part;membrane-bounded organelle;membrane-bounded vesicle;organelle;vesicle	biological regulation;cellular process;establishment of localization;protein targeting;protein transport;transport;vacuolar transport	cell part;extracellular organelle;intracellular;organelle;vesicle		Chorein_N;DUF1162;UBA	ATGTACA,MIR-493;BAELDE_DIABETIC_NEPHROPATHY_DN;chr1p36;CREIGHTON_ENDOCRINE_THERAPY_RESISTANCE_5;DODD_NASOPHARYNGEAL_CARCINOMA_UP;GAZDA_DIAMOND_BLACKFAN_ANEMIA_PROGENITOR_UP;GSE12845_IGD_POS_BLOOD_VS_DARKZONE_GC_TONSIL_BCELL_UP;GSE12845_NAIVE_VS_DARKZONE_GC_TONSIL_BCELL_UP;GSE13411_SWITCHED_MEMORY_BCELL_VS_PLASMA_CELL_UP;GSE13493_DP_VS_CD4INTCD8POS_THYMOCYTE_UP;GSE13493_DP_VS_CD8POS_THYMOCYTE_UP;G…	Completeproteome;Proteomicsidentification;Referenceproteome		GO:0006605;GO:0006623;GO:0006810;GO:0006886;GO:0007034;GO:0009987;GO:0015031;GO:0032507;GO:0045053;GO:0045184;GO:0045185;GO:0046907;GO:0051234;GO:0051235;GO:0051649;GO:0051651;GO:0065007;GO:0065008;GO:0072594;GO:0072666		GO:0005622;GO:0019898;GO:0031982;GO:0031988;GO:0043226;GO:0043227;GO:0043230;GO:0044421;GO:0044425;GO:0044464;GO:0065010;GO:0070062
13.1282806396484	14.9613590240479	15.5849332809448	13.2441177368164	13.6816892623901	14.7153167724609	12.6767721176147	14.1422863006592	14.1861457824707	12.3555555343628	13.9354333877563	13.9138774871826	13.2127990722656	13.2267503738403	13.99866771698	14.4294128417969	13.8794097900391	14.1024007797241	13.4849338531494	15.7107257843018	12.9318590164185	13.3555212020874	13.5689697265625	15.6853513717651	14.580753326416	13.9516839981079	15.5573740005493	14.1662759780884	14.5882844924927	13.9579238891602	12.9643106460571	13.6414108276367					anatomical structure development;biological regulation;cell development;cellular developmental process;cellular process;cellular response to stimulus;cellular response to stress;developmental process;glial cell development;negative regulation of biological process;negative regulation of biosynthetic process;negative regulation of cellular biosynthetic process;negative regulation of cellular macro…	binding;catalytic activity;enzyme regulator activity;GTPase regulator activity;guanyl-nucleotide exchange factor activity;nucleic acid binding;nucleoside-triphosphatase regulator activity;nucleotidyltransferase activity;RNA binding;transferase activity;transferase activity, transferring phosphorus-containing groups;translation factor activity, nucleic acid binding;translation initiation factor ac…	cell part;cytoplasm;cytoplasmic part;eukaryotic translation initiation factor 2B complex;intracellular part;macromolecular complex;protein complex	anatomical structure development;biological regulation;cell development;cellular process;developmental process;regulation of translation;response to abiotic stimulus;response to chemical stimulus;response to endogenous stimulus;response to heat;response to stimulus;response to stress;translational initiation	cell part;cytoplasm;macromolecular complex;protein complex	RNA transport	NTP_transferase	ANATOMICAL_STRUCTURE_DEVELOPMENT;BIOCARTA_VEGF_PATHWAY;BIOSYNTHETIC_PROCESS;BLALOCK_ALZHEIMERS_DISEASE_DN;BLALOCK_ALZHEIMERS_DISEASE_INCIPIENT_DN;CAMP_UP.V1_UP;CELL_DEVELOPMENT;CELLULAR_BIOSYNTHETIC_PROCESS;CELLULAR_COMPONENT_ASSEMBLY;CELLULAR_MACROMOLECULE_METABOLIC_PROCESS;CELLULAR_PROTEIN_METABOLIC_PROCESS;CELLULAR_RESPONSE_TO_STIMULUS;CENTRAL_NERVOUS_SYSTEM_DEVELOPMENT;chr1p34;CYTOPLASM;CYTOP…	Completeproteome;Proteomicsidentification;Referenceproteome		GO:0006140;GO:0006413;GO:0006417;GO:0006446;GO:0006950;GO:0009266;GO:0009408;GO:0009628;GO:0009719;GO:0009725;GO:0009743;GO:0009746;GO:0009749;GO:0009889;GO:0009890;GO:0009892;GO:0009894;GO:0009987;GO:0010033;GO:0010468;GO:0010556;GO:0010558;GO:0010605;GO:0010608;GO:0014003;GO:0017148;GO:0019219;GO:0019222;GO:0021782;GO:0030811;GO:0031323;GO:0031324;GO:0031326;GO:0031327;GO:0031329;GO:0032055;GO:…	GO:0003676;GO:0003723;GO:0003743;GO:0003824;GO:0005085;GO:0005488;GO:0008135;GO:0016740;GO:0016772;GO:0016779;GO:0030234;GO:0030695;GO:0060589	GO:0005737;GO:0005851;GO:0032991;GO:0043234;GO:0044424;GO:0044444;GO:0044464
14.3744955062866	12.9451656341553	15.5540494918823	15.6719007492065	13.8162975311279	13.7685651779175	15.1040658950806	14.8917112350464	14.8277244567871	15.6287307739258	15.1352281570435	14.1386117935181	14.1567211151123	14.4863691329956	13.7333822250366	13.6895427703857	13.4179830551147	15.6634473800659	15.580228805542	13.8675575256348	12.5811347961426	13.4104042053223	14.9368677139282	13.6203260421753	13.8397216796875	15.1158561706543	14.8056364059448	14.1964206695557	13.8904857635498	15.2419462203979	15.0088224411011	13.5085372924805					biological regulation;biosynthetic process;body fluid secretion;cellular biosynthetic process;cellular metabolic process;cellular nitrogen compound biosynthetic process;cellular nitrogen compound metabolic process;cellular process;establishment of localization;female pregnancy;heterocycle biosynthetic process;heterocycle metabolic process;lactation;metabolic process;multicellular organismal proce…		cell part;cytoplasm;intracellular membrane-bounded organelle;intracellular organelle;intracellular part;membrane-bounded organelle;nucleus;organelle	biological regulation;biosynthetic process;cellular metabolic process;cellular nitrogen compound metabolic process;cellular process;establishment of localization;heterocycle metabolic process;metabolic process;multicellular organismal process;multi-organism process;nitrogen compound metabolic process;nucleobase-containing compound metabolic process;nucleobase-containing small molecule metabolic p…	cell part;cytoplasm;intracellular membrane-bounded organelle;intracellular organelle;nucleus;organelle	Pyrimidine metabolism		CTTTGT_V$LEF1_Q2;DANG_BOUND_BY_MYC;DANG_MYC_TARGETS_UP;GGGCGGR_V$SP1_Q6;GSE14000_TRANSLATED_RNA_VS_MRNA_4H_LPS_DC_UP;GSE15659_TREG_VS_TCONV_UP;GSE17974_IL4_AND_ANTI_IL12_VS_UNTREATED_12H_ACT_CD4_TCELL_UP;GSE17974_IL4_AND_ANTI_IL12_VS_UNTREATED_72H_ACT_CD4_TCELL_UP;KEGG_PYRIMIDINE_METABOLISM;KRIEG_HYPOXIA_NOT_VIA_KDM3A;RNGTGGGC_UNKNOWN;V$CRX_Q4;V$EGR2_01;WTGAAAT_UNKNOWN	Completeproteome;Cytoplasm;Nucleus;Referenceproteome		GO:0006139;GO:0006213;GO:0006220;GO:0006221;GO:0006222;GO:0006753;GO:0006807;GO:0006810;GO:0007565;GO:0007589;GO:0007595;GO:0008152;GO:0009058;GO:0009116;GO:0009117;GO:0009119;GO:0009123;GO:0009124;GO:0009129;GO:0009130;GO:0009156;GO:0009161;GO:0009165;GO:0009173;GO:0009174;GO:0009218;GO:0009220;GO:0009259;GO:0009260;GO:0009719;GO:0009725;GO:0009987;GO:0010033;GO:0018130;GO:0022414;GO:0032501;GO:…		GO:0005634;GO:0005737;GO:0043226;GO:0043227;GO:0043229;GO:0043231;GO:0044424;GO:0044464
15.753321647644	16.0701427459717	15.7936544418335	15.4902238845825	16.0468673706055	16.4680347442627	15.4768095016479	15.678352355957	15.7184257507324	15.9860868453979	16.1047630310059	16.0750198364258	15.9524002075195	14.898588180542	15.8508701324463	16.0207405090332	16.1031246185303	16.2504653930664	15.7327766418457	16.8842906951904	15.8768043518066	15.7782564163208	15.7455959320068	16.1571292877197	16.0850162506104	16.4734687805176	16.4669208526611	16.3695964813232	15.5773105621338	16.0074005126953	16.1214923858643	16.4108657836914					activation of immune response;antigen receptor-mediated signaling pathway;biological regulation;cAMP catabolic process;cAMP metabolic process;catabolic process;cell chemotaxis;cell migration;cell motility;cell surface receptor linked signaling pathway;cellular catabolic process;cellular component movement;cellular metabolic process;cellular nitrogen compound catabolic process;cellular nitrogen co…	3',5'-cyclic-AMP phosphodiesterase activity;3',5'-cyclic-nucleotide phosphodiesterase activity;adenyl nucleotide binding;adenyl ribonucleotide binding;AMP binding;binding;cAMP binding;catalytic activity;cation binding;cyclic nucleotide binding;cyclic-nucleotide phosphodiesterase activity;hydrolase activity;hydrolase activity, acting on ester bonds;ion binding;ion channel binding;metal ion binding…	cell part;cell periphery;contractile fiber part;cytoplasmic part;cytosol;intracellular part;membrane;organelle part;Z disc	biological regulation;catabolic process;cell motility;cellular component movement;cellular metabolic process;cellular nitrogen compound metabolic process;cellular process;heterocycle metabolic process;homeostatic process;immune system process;locomotion;metabolic process;nitrogen compound metabolic process;nucleobase-containing compound catabolic process;nucleobase-containing compound metabolic p…	cell part;cytosol;membrane	Purine metabolism	PDEase_I	3_5_CYCLIC_NUCLEOTIDE_PHOSPHODIESTERASE_ACTIVITY;AACATTC,MIR-409-3P;AACTTT_UNKNOWN;AATGTGA,MIR-23A,MIR-23B;ACACTAC,MIR-142-3P;AKT_UP.V1_DN;ATGCTGC,MIR-103,MIR-107;BAELDE_DIABETIC_NEPHROPATHY_DN;BLALOCK_ALZHEIMERS_DISEASE_DN;BMI1_DN.V1_DN;BMI1_DN_MEL18_DN.V1_DN;BROWNE_HCMV_INFECTION_20HR_DN;BROWNE_HCMV_INFECTION_4HR_DN;BRUINS_UVC_RESPONSE_LATE;CAGGTA_V$AREB6_01;CAGGTG_V$E12_Q6;CELL_FRACTION;CHANDR…	Completeproteome;Hydrolase;Metal-binding;Proteomicsidentification;Referenceproteome		GO:0001780;GO:0001817;GO:0001819;GO:0002237;GO:0002253;GO:0002262;GO:0002376;GO:0002429;GO:0002682;GO:0002684;GO:0002757;GO:0002764;GO:0002768;GO:0006139;GO:0006163;GO:0006195;GO:0006198;GO:0006753;GO:0006807;GO:0006928;GO:0006935;GO:0007165;GO:0007166;GO:0008152;GO:0009056;GO:0009117;GO:0009123;GO:0009125;GO:0009166;GO:0009187;GO:0009214;GO:0009605;GO:0009607;GO:0009719;GO:0009987;GO:0010033;GO:…	GO:0000166;GO:0003824;GO:0004112;GO:0004114;GO:0004115;GO:0005488;GO:0005515;GO:0008081;GO:0016208;GO:0016787;GO:0016788;GO:0017076;GO:0030551;GO:0030552;GO:0030554;GO:0032553;GO:0032555;GO:0032559;GO:0042578;GO:0043167;GO:0043169;GO:0044325;GO:0046872	GO:0005829;GO:0016020;GO:0030018;GO:0044422;GO:0044424;GO:0044444;GO:0044449;GO:0044464;GO:0071944
16.2923755645752	16.7351589202881	17.3388233184814	17.231351852417	16.6723155975342	17.3650417327881	16.8246364593506	16.8105220794678	17.0248584747314	17.3847332000732	16.7953796386719	16.8986492156982	16.9174194335938	17.0709590911865	16.7853240966797	16.9666862487793	17.4210300445557	16.9471797943115	17.1755294799805	17.0018482208252	17.3805961608887	17.1591625213623	17.5758495330811	17.1653575897217	16.5138053894043	17.420618057251	17.172700881958	16.2537002563477	16.2583446502686	17.2399520874023	16.901008605957	17.3744964599609					anatomical structure development;apoptosis;biological regulation;cation transport;cell death;cellular chemical homeostasis;cellular homeostasis;cellular ion homeostasis;cellular process;chemical homeostasis;death;developmental process;establishment of localization;homeostatic process;induction of apoptosis;induction of apoptosis by intracellular signals;induction of apoptosis by ionic changes;ind…	cation channel activity;cation transmembrane transporter activity;channel activity;gated channel activity;ion channel activity;ion transmembrane transporter activity;passive transmembrane transporter activity;sodium channel activity;substrate-specific channel activity;substrate-specific transmembrane transporter activity;substrate-specific transporter activity;transmembrane transporter activity;t…	axon;axon part;cation channel complex;cell junction;cell part;cell projection;cell projection part;cell-cell contact zone;cell-cell junction;cytoplasm;intercalated disc;intracellular part;ion channel complex;macromolecular complex;membrane;membrane part;neuron projection;paranode region of axon;plasma membrane;plasma membrane part;protein complex;sodium channel complex;T-tubule;voltage-gated sodi…	anatomical structure development;biological regulation;cell death;cellular homeostasis;cellular ion homeostasis;cellular process;death;developmental process;establishment of localization;homeostatic process;ion transport;transmembrane transport;transport	cell part;cell projection;cytoplasm;macromolecular complex;membrane;neuron projection;plasma membrane;protein complex		DUF3451;Ion_trans;Na_trans_assoc	AAAGGAT,MIR-501;AACTGAC,MIR-223;AACTGGA,MIR-145;ASGHARZADEH_NEUROBLASTOMA_POOR_SURVIVAL_DN;ATGTCAC,MIR-489;BLALOCK_ALZHEIMERS_DISEASE_DN;BLALOCK_ALZHEIMERS_DISEASE_INCIPIENT_DN;CAGCTG_V$AP4_Q5;CATION_CHANNEL_ACTIVITY;CATION_TRANSMEMBRANE_TRANSPORTER_ACTIVITY;CATION_TRANSPORT;CCANNAGRKGGC_UNKNOWN;chr17q23;chr2q24;CTTTGA_V$LEF1_Q2;CTTTGT_V$LEF1_Q2;CTTTGTA,MIR-524;DAVICIONI_TARGETS_OF_PAX_FOXO1_FUSI…	Completeproteome;Glycoprotein;Ionchannel;Iontransport;Membrane;Phosphoprotein;Proteomicsidentification;Referenceproteome;Repeat;Sodium;Sodiumchannel;Sodiumtransport;Transmembrane;Transmembranehelix;Transport;Voltage-gatedchannel		GO:0001508;GO:0006810;GO:0006811;GO:0006812;GO:0006814;GO:0006873;GO:0006915;GO:0006917;GO:0007399;GO:0008219;GO:0008627;GO:0008629;GO:0009987;GO:0010941;GO:0010942;GO:0012501;GO:0012502;GO:0015672;GO:0016265;GO:0019228;GO:0019725;GO:0030001;GO:0032502;GO:0034220;GO:0035725;GO:0042391;GO:0042592;GO:0042981;GO:0043065;GO:0043067;GO:0043068;GO:0048518;GO:0048522;GO:0048731;GO:0048856;GO:0048878;GO:…	GO:0005215;GO:0005216;GO:0005244;GO:0005248;GO:0005261;GO:0005272;GO:0008324;GO:0015075;GO:0015267;GO:0022803;GO:0022832;GO:0022836;GO:0022838;GO:0022843;GO:0022857;GO:0022891;GO:0022892	GO:0001518;GO:0005737;GO:0005886;GO:0005911;GO:0014704;GO:0016020;GO:0030054;GO:0030315;GO:0030424;GO:0032991;GO:0033267;GO:0033270;GO:0034702;GO:0034703;GO:0034706;GO:0042995;GO:0043005;GO:0043234;GO:0044291;GO:0044424;GO:0044425;GO:0044459;GO:0044463;GO:0044464
16.6800289154053	17.0438823699951	17.4917755126953	17.6087741851807	18.00563621521	17.4177379608154	17.6345977783203	17.1850490570068	16.5343189239502	17.7345638275146	16.5021171569824	17.6223526000977	17.0098495483398	17.1606388092041	17.0452690124512	17.518684387207	17.5460052490234	17.2340698242188	17.4781684875488	17.3652114868164	17.2996559143066	17.1159381866455	17.4025783538818	17.2620582580566	17.0698070526123	17.8447551727295	16.9723072052002	16.4820995330811	16.9446659088135	17.2800273895264	16.875316619873	17.372371673584											NHS	BRUINS_UVC_RESPONSE_VIA_TP53_GROUP_A;GSE11864_UNTREATED_VS_CSF1_IN_MAC_DN;GSE13229_IMM_VS_MATURE_NKCELL_DN;GSE13306_LAMINA_PROPRIA_VS_SPLEEN_TREG_UP;GSE14308_TH2_VS_TH1_DN;GSE15324_NAIVE_VS_ACTIVATED_ELF4_KO_CD8_TCELL_UP;GSE15930_STIM_VS_STIM_AND_IFNAB_72H_CD8_T_CELL_UP;GSE15930_STIM_VS_STIM_AND_IL-12_24H_CD8_T_CELL_DN;GSE15930_STIM_VS_STIM_AND_IL-12_72H_CD8_T_CELL_DN;GSE15930_STIM_VS_STIM_AND_TR…	Completeproteome;Referenceproteome
20.2080059051514	19.8516635894775	20.0313358306885	19.9356021881104	20.0762672424316	20.4719924926758	19.9805030822754	20.5559978485107	13.4268293380737	19.7030487060547	19.6487255096436	19.6900081634521	13.9414844512939	19.9486351013184	20.6489543914795	19.9900932312012	20.6345806121826	14.3331203460693	19.6262435913086	14.53724193573	19.8828582763672	19.69287109375	15.0942888259888	20.2480621337891	19.6539287567139	19.9554634094238	19.9974174499512	20.2408618927002	20.7498474121094	20.0860214233398	14.7746715545654	15.2740964889526							cell junction;cell part;integral to membrane;intrinsic to membrane;membrane;membrane part;plasma membrane;synapse		cell part;membrane;plasma membrane;synapse		DOMON		Celljunction;Cellmembrane;Completeproteome;Membrane;Referenceproteome;Signal;Synapse;Transmembrane;Transmembranehelix				GO:0005886;GO:0016020;GO:0016021;GO:0030054;GO:0031224;GO:0044425;GO:0044464;GO:0045202
13.7756996154785	12.977237701416	14.2814617156982	13.6675624847412	13.7200183868408	13.3402557373047	13.224946975708	14.1616048812866	14.6462850570679	14.4344615936279	14.5823011398315	12.9771709442139	14.4857797622681	14.7425947189331	14.1513080596924	13.9397773742676	13.1616916656494	14.535680770874	14.3538265228271	14.9509601593018	14.1565761566162	13.7391757965088	14.4274873733521	13.5821704864502	13.4588623046875	14.0075187683105	14.6062135696411	14.0366363525391	13.5777902603149	14.4692916870117	14.2657623291016	14.3714532852173					biological regulation;negative regulation of biological process;negative regulation of biosynthetic process;negative regulation of cellular biosynthetic process;negative regulation of cellular macromolecule biosynthetic process;negative regulation of cellular metabolic process;negative regulation of cellular process;negative regulation of gene expression;negative regulation of macromolecule biosy…	binding;catalytic activity;cation binding;DNA binding;ion binding;ligase activity;metal ion binding;nucleic acid binding;nucleic acid binding transcription factor activity;regulatory region DNA binding;regulatory region nucleic acid binding;RNA polymerase II core promoter proximal region sequence-specific DNA binding transcription factor activity;RNA polymerase II core promoter proximal region se…	cell part;cytoplasm;intracellular membrane-bounded organelle;intracellular organelle;intracellular organelle part;intracellular part;membrane;membrane-bounded organelle;nuclear part;nucleoplasm;nucleus;organelle;organelle part;plasma membrane	biological regulation	cell part;cytoplasm;intracellular membrane-bounded organelle;intracellular organelle;membrane;nucleoplasm;nucleus;organelle;plasma membrane		R3H;zf-NF-X1	BIOPOLYMER_METABOLIC_PROCESS;BLALOCK_ALZHEIMERS_DISEASE_UP;CACGTG_V$MYC_Q2;CAMP_UP.V1_UP;chr9p12;DEFENSE_RESPONSE;DEURIG_T_CELL_PROLYMPHOCYTIC_LEUKEMIA_DN;DNA_BINDING;DODD_NASOPHARYNGEAL_CARCINOMA_UP;ENK_UV_RESPONSE_EPIDERMIS_UP;GAUSSMANN_MLL_AF4_FUSION_TARGETS_G_UP;GKCGCNNNNNNNTGAYG_UNKNOWN;GSE10325_BCELL_VS_MYELOID_UP;GSE11864_UNTREATED_VS_CSF1_IFNG_IN_MAC_DN;GSE12366_PLASMA_CELL_VS_MEMORY_BCEL…	Alternativesplicing;Completeproteome;DNA-binding;Ligase;Metal-binding;Nucleus;Phosphoprotein;Referenceproteome;Repeat;Repressor;Transcription;Transcriptionregulation;Ublconjugationpathway;Zinc;Zinc-finger		GO:0000122;GO:0006355;GO:0006357;GO:0009889;GO:0009890;GO:0009892;GO:0010468;GO:0010556;GO:0010558;GO:0010605;GO:0010629;GO:0019219;GO:0019222;GO:0031323;GO:0031324;GO:0031326;GO:0031327;GO:0045346;GO:0045347;GO:0045892;GO:0045934;GO:0048519;GO:0048523;GO:0050789;GO:0050794;GO:0051171;GO:0051172;GO:0051252;GO:0051253;GO:0060255;GO:0065007;GO:0080090;GO:2000112;GO:2000113	GO:0000975;GO:0000976;GO:0000977;GO:0000981;GO:0000982;GO:0001012;GO:0001067;GO:0001071;GO:0001078;GO:0003676;GO:0003677;GO:0003700;GO:0003824;GO:0005488;GO:0008270;GO:0016874;GO:0043167;GO:0043169;GO:0043565;GO:0044212;GO:0046872;GO:0046914	GO:0005634;GO:0005654;GO:0005737;GO:0005886;GO:0016020;GO:0043226;GO:0043227;GO:0043229;GO:0043231;GO:0044422;GO:0044424;GO:0044428;GO:0044446;GO:0044464
15.4908199310303	16.0171337127686	16.206937789917	15.7189073562622	15.9313840866089	15.4110803604126	15.9677438735962	15.8029956817627	15.6155433654785	15.5602731704712	15.9602279663086	15.6631689071655	15.3782606124878	15.6343574523926	15.5195436477661	16.5713672637939	13.6114854812622	15.7391738891602	16.2355098724365	16.0208930969238	16.4658374786377	15.6546077728271	15.8529443740845	14.9907245635986	15.6556148529053	13.6348762512207	16.0521011352539	13.8051433563232	14.0447359085083	16.5015563964844	16.1594772338867	13.8766689300537					biological regulation;catabolic process;cellular catabolic process;cellular macromolecule catabolic process;cellular macromolecule metabolic process;cellular metabolic process;cellular process;cellular protein metabolic process;macromolecule catabolic process;macromolecule metabolic process;macromolecule modification;metabolic process;modification-dependent macromolecule catabolic process;modific…	catalytic activity;cysteine-type endopeptidase activity;cysteine-type peptidase activity;endopeptidase activity;hydrolase activity;peptidase activity;peptidase activity, acting on L-amino acid peptides;small conjugating protein-specific protease activity;ubiquitin-specific protease activity		biological regulation;catabolic process;cellular metabolic process;cellular process;macromolecule metabolic process;macromolecule modification;metabolic process;primary metabolic process;protein metabolic process;protein modification by small protein conjugation or removal;protein modification process;proteolysis;proteolysis involved in cellular protein catabolic process			UCH	CAIRO_HEPATOBLASTOMA_CLASSES_UP;chr1p32;DACOSTA_UV_RESPONSE_VIA_ERCC3_COMMON_DN;DACOSTA_UV_RESPONSE_VIA_ERCC3_DN;DAIRKEE_TERT_TARGETS_DN;DAZARD_RESPONSE_TO_UV_NHEK_DN;DAZARD_UV_RESPONSE_CLUSTER_G6;GSE13411_IGM_MEMORY_BCELL_VS_PLASMA_CELL_UP;GSE13411_NAIVE_BCELL_VS_PLASMA_CELL_UP;GSE13485_CTRL_VS_DAY21_YF17D_VACCINE_PBMC_UP;GSE1460_INTRATHYMIC_T_PROGENITOR_VS_THYMIC_STROMAL_CELL_UP;GSE15750_DAY6_V…	Alternativesplicing;Completeproteome;Hydrolase;Phosphoprotein;Protease;Referenceproteome;Thiolprotease;Ublconjugationpathway		GO:0006464;GO:0006508;GO:0006511;GO:0008152;GO:0009056;GO:0009057;GO:0009894;GO:0009987;GO:0010498;GO:0016579;GO:0019222;GO:0019538;GO:0019941;GO:0030162;GO:0031323;GO:0031329;GO:0032268;GO:0042176;GO:0043161;GO:0043170;GO:0043412;GO:0043632;GO:0044237;GO:0044238;GO:0044248;GO:0044260;GO:0044265;GO:0044267;GO:0050789;GO:0050794;GO:0051246;GO:0051603;GO:0060255;GO:0061136;GO:0065007;GO:0070646;GO:…	GO:0003824;GO:0004175;GO:0004197;GO:0004843;GO:0008233;GO:0008234;GO:0016787;GO:0019783;GO:0070011
15.7835865020752	16.5974998474121	16.5870456695557	15.9387521743774	16.1845855712891	16.5841846466064	16.3294277191162	16.5008888244629	16.1049060821533	16.1303691864014	16.1114616394043	16.52001953125	16.5330104827881	16.405855178833	16.2634162902832	16.5823631286621	16.2496318817139	16.7110214233398	16.0393905639648	16.3384227752686	16.7196025848389	16.6212787628174	17.122220993042	15.9647016525269	16.0695552825928	16.4029121398926	16.5901927947998	15.6074457168579	16.5493927001953	16.5489273071289	16.2838668823242	16.380054473877					signaling		cell part;membrane;synapse	signaling	cell part;membrane;synapse		GKAP	AAANWWTGC_UNKNOWN;AACTTT_UNKNOWN;AMIT_EGF_RESPONSE_240_HELA;AMIT_EGF_RESPONSE_480_HELA;ASTIER_INTEGRIN_SIGNALING;ATATGCA,MIR-448;BROWNE_HCMV_INFECTION_48HR_DN;BUYTAERT_PHOTODYNAMIC_THERAPY_STRESS_UP;CCAGGGG,MIR-331;chr20q11;CTACCTC,LET-7A,LET-7B,LET-7C,LET-7D,LET-7E,LET-7F,MIR-98,LET-7G,LET-7I;CTGAGCC,MIR-24;CTTTGT_V$LEF1_Q2;DOUGLAS_BMI1_TARGETS_UP;GGARNTKYCCA_UNKNOWN;GGGCGGR_V$SP1_Q6;GGTGTGT,MIR…	Alternativesplicing;Completeproteome;Membrane;Phosphoprotein;Referenceproteome		GO:0023052		GO:0016020;GO:0044464;GO:0045202
12.9770402908325	13.9204549789429	13.5619602203369	14.2888984680176	15.0027275085449	13.6539306640625	13.4965105056763	14.0417442321777	13.9573764801025	12.1152248382568	14.1846866607666	14.1796960830688	13.7259502410889	13.3988494873047	14.0436735153198	13.4967851638794	13.5363988876343	14.4063282012939	14.0371923446655	12.9391441345215	13.740686416626	14.9250640869141	14.1292333602905	13.2968406677246	14.2835559844971	14.0373754501343	14.3290462493896	14.7042818069458	13.0604839324951	13.6032266616821	13.2509565353394	13.9534549713135					amide biosynthetic process;amine biosynthetic process;amine catabolic process;amine metabolic process;anatomical structure development;anatomical structure morphogenesis;arginine biosynthetic process;arginine metabolic process;biological regulation;biosynthetic process;body fluid secretion;carbamoyl phosphate biosynthetic process;carbamoyl phosphate metabolic process;carboxylic acid biosynthetic …	adenyl nucleotide binding;adenyl ribonucleotide binding;amine binding;amino acid binding;aspartate carbamoyltransferase activity;ATP binding;binding;carbamoyl-phosphate synthase (ammonia) activity;carbamoyl-phosphate synthase (glutamine-hydrolyzing) activity;carbon-nitrogen ligase activity, with glutamine as amido-N-donor;carboxyl- or carbamoyltransferase activity;carboxylic acid binding;catalyti…	axon part;cell body;cell part;cell projection part;cytoplasm;cytoplasmic part;cytosol;extracellular membrane-bounded organelle;extracellular organelle;extracellular region part;extracellular vesicular exosome;intracellular membrane-bounded organelle;intracellular organelle;intracellular organelle part;intracellular part;macromolecular complex;membrane;membrane-bounded organelle;membrane-bounded v…	amine metabolic process;anatomical structure development;anatomical structure morphogenesis;biological regulation;biosynthetic process;catabolic process;cellular amide metabolic process;cellular amino acid metabolic process;cellular aromatic compound metabolic process;cellular ketone metabolic process;cellular metabolic process;cellular nitrogen compound metabolic process;cellular process;develop…	cell body;cell part;cytoplasm;cytosol;extracellular organelle;intracellular membrane-bounded organelle;intracellular organelle;macromolecular complex;membrane;neuronal cell body;nucleoplasm;nucleus;organelle;plasma membrane;protein complex;vesicle	Alanine, aspartate and glutamate metabolism;Pyrimidine metabolism	CPSase_L_chain;CPSase_L_D2;CPSase_L_D3;CPSase_sm_chain;GATase;MGS;OTCace;OTCace_N	BACOLOD_RESISTANCE_TO_ALKYLATING_AGENTS_DN;BAE_BRCA1_TARGETS_DN;BASAKI_YBX1_TARGETS_UP;BENPORATH_MYC_MAX_TARGETS;BOYLAN_MULTIPLE_MYELOMA_C_CLUSTER_UP;BOYLAN_MULTIPLE_MYELOMA_C_UP;BURTON_ADIPOGENESIS_2;BURTON_ADIPOGENESIS_PEAK_AT_24HR;CACGTG_V$MYC_Q2;CAIRO_HEPATOBLASTOMA_CLASSES_UP;CAIRO_PML_TARGETS_BOUND_BY_MYC_UP;CCGNMNNTNACG_UNKNOWN;chr2p22;CREIGHTON_ENDOCRINE_THERAPY_RESISTANCE_1;CUI_TCF21_TAR…	Acetylation;Allostericenzyme;Alternativesplicing;ATP-binding;Completeproteome;Cytoplasm;Hydrolase;Ligase;Metal-binding;Multifunctionalenzyme;Nucleotide-binding;Nucleus;Phosphoprotein;Pyrimidinebiosynthesis;Referenceproteome;Repeat;Transferase;Zinc		GO:0000050;GO:0001889;GO:0006082;GO:0006139;GO:0006206;GO:0006207;GO:0006213;GO:0006220;GO:0006221;GO:0006222;GO:0006228;GO:0006464;GO:0006468;GO:0006520;GO:0006525;GO:0006526;GO:0006541;GO:0006543;GO:0006725;GO:0006753;GO:0006793;GO:0006796;GO:0006807;GO:0006810;GO:0007507;GO:0007565;GO:0007589;GO:0007595;GO:0008152;GO:0008652;GO:0009056;GO:0009058;GO:0009063;GO:0009064;GO:0009065;GO:0009084;GO:…	GO:0000166;GO:0002134;GO:0003824;GO:0004070;GO:0004087;GO:0004088;GO:0004151;GO:0004672;GO:0005488;GO:0005515;GO:0005524;GO:0008270;GO:0016301;GO:0016597;GO:0016740;GO:0016741;GO:0016743;GO:0016772;GO:0016773;GO:0016787;GO:0016810;GO:0016812;GO:0016874;GO:0016879;GO:0016884;GO:0017076;GO:0019103;GO:0019899;GO:0030554;GO:0031406;GO:0032553;GO:0032555;GO:0032557;GO:0032559;GO:0035639;GO:0043167;GO:…	GO:0005634;GO:0005654;GO:0005737;GO:0005829;GO:0005886;GO:0016020;GO:0016363;GO:0031982;GO:0031988;GO:0032991;GO:0033267;GO:0043025;GO:0043195;GO:0043226;GO:0043227;GO:0043229;GO:0043230;GO:0043231;GO:0043234;GO:0044297;GO:0044421;GO:0044422;GO:0044424;GO:0044428;GO:0044444;GO:0044446;GO:0044456;GO:0044463;GO:0044464;GO:0065010;GO:0070062
14.0228900909424	14.8328742980957	14.452187538147	14.0700664520264	14.4316215515137	13.6286373138428	13.9165506362915	14.0458755493164	12.6915445327759	14.3438386917114	12.9500389099121	14.9498825073242	14.3299674987793	14.8456830978394	14.1321449279785	13.4867935180664	14.6193857192993	14.3185739517212	13.7080984115601	15.6023817062378	14.4249362945557	13.7285375595093	13.2143106460571	13.6152200698853	15.5218067169189	12.6509103775024	14.5285577774048	13.3792591094971	13.8636569976807	14.5359220504761	13.4522171020508	13.5083160400391					cellular macromolecule metabolic process;cellular metabolic process;cellular nitrogen compound metabolic process;cellular process;macromolecule metabolic process;metabolic process;nitrogen compound metabolic process;nucleic acid metabolic process;nucleobase-containing compound metabolic process;primary metabolic process;response to chemical stimulus;response to cytokine stimulus;response to inter…	adenyl nucleotide binding;adenyl ribonucleotide binding;ATP binding;ATPase activity;ATPase activity, coupled;ATP-dependent helicase activity;ATP-dependent RNA helicase activity;binding;catalytic activity;enzyme binding;helicase activity;hydrolase activity;hydrolase activity, acting on acid anhydrides;hydrolase activity, acting on acid anhydrides, in phosphorus-containing anhydrides;nucleoside-tri…	cell part;cytoplasm;cytoplasmic part;endoplasmic reticulum;intracellular membrane-bounded organelle;intracellular organelle;intracellular part;membrane-bounded organelle;nucleus;organelle	cellular metabolic process;cellular nitrogen compound metabolic process;cellular process;macromolecule metabolic process;metabolic process;nitrogen compound metabolic process;nucleobase-containing compound metabolic process;primary metabolic process;response to chemical stimulus;response to stimulus;RNA metabolic process;RNA processing	cell part;cytoplasm;endoplasmic reticulum;intracellular membrane-bounded organelle;intracellular organelle;nucleus;organelle		Ank_2;DEAD;HA2;Helicase_C;OB_NTP_bind;R3H;YTH	BILD_SRC_ONCOGENIC_SIGNATURE;BONOME_OVARIAN_CANCER_SURVIVAL_SUBOPTIMAL_DEBULKING;CADWELL_ATG16L1_TARGETS_DN;CHEOK_RESPONSE_TO_MERCAPTOPURINE_AND_HD_MTX_DN;chr5q22;GABRIELY_MIR21_TARGETS;GAUSSMANN_MLL_AF4_FUSION_TARGETS_A_UP;GSE11924_TH1_VS_TH2_CD4_TCELL_UP;GSE13411_SWITCHED_MEMORY_BCELL_VS_PLASMA_CELL_UP;GSE13484_UNSTIM_VS_12H_YF17D_VACCINE_STIM_PBMC_UP;GSE20151_CTRL_VS_FUSOBACT_NUCLEATUM_NEUTROP…	ANKrepeat;ATP-binding;Completeproteome;Helicase;Hydrolase;Nucleotide-binding;Phosphoprotein;Referenceproteome;Repeat;RNA-binding		GO:0006139;GO:0006396;GO:0006807;GO:0008152;GO:0009987;GO:0010033;GO:0016070;GO:0034097;GO:0034612;GO:0034641;GO:0042221;GO:0043170;GO:0044237;GO:0044238;GO:0044260;GO:0050896;GO:0070555;GO:0090304	GO:0000166;GO:0003724;GO:0003824;GO:0004004;GO:0004386;GO:0005488;GO:0005515;GO:0005524;GO:0008026;GO:0008186;GO:0016462;GO:0016787;GO:0016817;GO:0016818;GO:0016887;GO:0017076;GO:0017111;GO:0019899;GO:0030554;GO:0032553;GO:0032555;GO:0032559;GO:0035639;GO:0042623;GO:0070035;GO:0070063	GO:0005634;GO:0005737;GO:0005783;GO:0043226;GO:0043227;GO:0043229;GO:0043231;GO:0044424;GO:0044444;GO:0044464
18.9046001434326	18.141658782959	18.4275493621826	17.9972229003906	18.5351467132568	18.633358001709	18.3318004608154	17.9007720947266	18.1667804718018	18.4809322357178	18.4723892211914	18.3854923248291	18.4638748168945	18.4844760894775	17.9655590057373	18.2191581726074	18.2479000091553	18.4610805511475	17.926944732666	18.5691871643066	18.9254970550537	18.4839267730713	18.8647480010986	18.5056800842285	18.1028785705566	19.0681533813477	18.6789302825928	19.1513290405273	17.6009578704834	18.8052711486816	18.1784515380859	18.8839321136475					biological regulation;cAMP-mediated signaling;cell cycle;cell division;cell surface receptor linked signaling pathway;cellular process;cellular response to stimulus;cyclic-nucleotide-mediated signaling;G-protein coupled receptor protein signaling pathway;G-protein signaling, coupled to cAMP nucleotide second messenger;G-protein signaling, coupled to cyclic nucleotide second messenger;intracellula…	binding;catalytic activity;cation binding;G-protein beta/gamma-subunit complex binding;G-protein-coupled receptor binding;GTP binding;GTPase activity;guanyl nucleotide binding;guanyl ribonucleotide binding;hydrolase activity;hydrolase activity, acting on acid anhydrides;hydrolase activity, acting on acid anhydrides, in phosphorus-containing anhydrides;ion binding;metabotropic serotonin receptor b…	cell part;centrosome;cytoplasm;cytoplasmic part;cytoskeletal part;extracellular membrane-bounded organelle;extracellular organelle;extracellular region part;extracellular vesicular exosome;extrinsic to internal side of plasma membrane;extrinsic to membrane;extrinsic to plasma membrane;heterotrimeric G-protein complex;intracellular;intracellular membrane-bounded organelle;intracellular non-membran…	biological regulation;cell cycle;cell division;cellular process;metabolic process;response to stimulus;signal transduction	cell part;centrosome;cytoplasm;extracellular organelle;intracellular;intracellular membrane-bounded organelle;intracellular non-membrane-bounded organelle;intracellular organelle;macromolecular complex;membrane;microtubule organizing center;midbody;nucleus;organelle;plasma membrane;protein complex;vesicle	Axon guidance;Chagas disease (American trypanosomiasis);Chemokine signaling pathway;Gap junction;Gastric acid secretion;Leukocyte transendothelial migration;Long-term depression;Melanogenesis;Progesterone-mediated oocyte maturation;Tight junction;Toxoplasmosis	G-alpha	AACTTT_UNKNOWN;AAGCACA,MIR-218;AKL_HTLV1_INFECTION_UP;ASGHARZADEH_NEUROBLASTOMA_POOR_SURVIVAL_DN;ATATGCA,MIR-448;BENPORATH_NANOG_TARGETS;BENPORATH_SOX2_TARGETS;BILANGES_SERUM_SENSITIVE_VIA_TSC1;BIOCARTA_BIOPEPTIDES_PATHWAY;BIOCARTA_CXCR4_PATHWAY;BIOCARTA_EDG1_PATHWAY;BIOCARTA_GPCR_PATHWAY;BIOCARTA_GSK3_PATHWAY;BIOCARTA_MPR_PATHWAY;BIOCARTA_PAR1_PATHWAY;BIOCARTA_SPPA_PATHWAY;BONOME_OVARIAN_CANCER_…	Cellcycle;Celldivision;Cellmembrane;Completeproteome;Cytoplasm;Cytoskeleton;GTP-binding;Lipoprotein;Magnesium;Membrane;Metal-binding;Myristate;Nucleotide-binding;Nucleus;Palmitate;Referenceproteome;Transducer		GO:0007049;GO:0007165;GO:0007166;GO:0007186;GO:0007187;GO:0007188;GO:0008152;GO:0009987;GO:0019932;GO:0019933;GO:0019935;GO:0035556;GO:0050789;GO:0050794;GO:0050896;GO:0051301;GO:0051716;GO:0065007	GO:0000166;GO:0001664;GO:0003824;GO:0003924;GO:0004871;GO:0005102;GO:0005488;GO:0005515;GO:0005525;GO:0016462;GO:0016787;GO:0016817;GO:0016818;GO:0017076;GO:0017111;GO:0019001;GO:0031683;GO:0031821;GO:0032403;GO:0032553;GO:0032555;GO:0032561;GO:0035639;GO:0043167;GO:0043169;GO:0046872;GO:0060089	GO:0005622;GO:0005634;GO:0005737;GO:0005765;GO:0005774;GO:0005813;GO:0005815;GO:0005834;GO:0005886;GO:0016020;GO:0019897;GO:0019898;GO:0030496;GO:0031090;GO:0031234;GO:0031982;GO:0031988;GO:0032991;GO:0043226;GO:0043227;GO:0043228;GO:0043229;GO:0043230;GO:0043231;GO:0043232;GO:0043234;GO:0044421;GO:0044422;GO:0044424;GO:0044425;GO:0044430;GO:0044437;GO:0044444;GO:0044446;GO:0044459;GO:0044464;GO:…
12.7667016983032	12.8334627151489	13.4709396362305	13.5223207473755	14.6311006546021	15.799054145813	14.3222789764404	13.9432287216187	13.6133241653442	16.2501125335693	12.5360584259033	13.3801937103271	12.7974681854248	14.0433645248413	13.7304096221924	14.4386253356934	13.4844837188721	13.9856128692627	13.792236328125	14.7453784942627	13.6994152069092	14.1138687133789	13.2571105957031	14.925311088562	14.7455396652222	13.1610946655273	14.1273803710938	12.5950155258179	13.5862579345703	13.6175298690796	13.8194189071655	13.1297101974487					amine transport;amino acid transport;behavior;biological regulation;carboxylic acid transport;cell communication;cell-cell signaling;cellular component assembly;cellular component organization;cellular component organization or biogenesis;cellular process;chordate embryonic development;developmental process;embryo development;embryo development ending in birth or egg hatching;establishment of loc…	beta-amyloid binding;binding;lipid binding;phosphatidylinositol binding;phosphatidylinositol-4,5-bisphosphate binding;phospholipid binding;protein binding	cell part;clathrin-coated vesicle;coated vesicle;cytoplasmic membrane-bounded vesicle;cytoplasmic part;cytoplasmic vesicle;Golgi apparatus;intracellular membrane-bounded organelle;intracellular organelle;intracellular part;macromolecular complex;membrane;membrane-bounded organelle;membrane-bounded vesicle;nucleus;organelle;perinuclear region of cytoplasm;plasma membrane;protein complex;synapse pa…	amine transport;amino acid transport;behavior;biological regulation;cell communication;cell-cell signaling;cellular component assembly;cellular component organization;cellular process;developmental process;embryo development;establishment of localization;growth;macromolecular complex assembly;multicellular organismal process;organic acid transport;protein complex assembly;protein transport;respon…	cell part;cytoplasmic membrane-bounded vesicle;Golgi apparatus;intracellular membrane-bounded organelle;intracellular organelle;macromolecular complex;membrane;nucleus;organelle;plasma membrane;protein complex;vesicle		PDZ;PID	AACTTT_UNKNOWN;AAGWWRNYGGC_UNKNOWN;ANATOMICAL_STRUCTURE_DEVELOPMENT;ATF2_UP.V1_UP;BENPORATH_ES_WITH_H3K27ME3;BERTUCCI_MEDULLARY_VS_DUCTAL_BREAST_CANCER_DN;CAGCTG_V$AP4_Q5;CAGGTG_V$E12_Q6;CCCNNGGGAR_V$OLF1_01;CELL_CELL_SIGNALING;CELLULAR_COMPONENT_ASSEMBLY;CELLULAR_LOCALIZATION;chr9q13;CLATHRIN_COATED_VESICLE;COATED_VESICLE;CTGAGCC,MIR-24;CTIP_DN.V1_DN;CYTOPLASM;CYTOPLASMIC_MEMBRANE_BOUND_VESICLE;…	Alternativesplicing;Completeproteome;Cytoplasm;Directproteinsequencing;Golgiapparatus;Nucleus;Phosphoprotein;Proteintransport;Referenceproteome;Repeat;Transport	CASK-MINT complex	GO:0001701;GO:0006461;GO:0006810;GO:0006865;GO:0006886;GO:0007154;GO:0007267;GO:0007268;GO:0007610;GO:0007626;GO:0009790;GO:0009792;GO:0009987;GO:0010468;GO:0014047;GO:0014051;GO:0015031;GO:0015812;GO:0015837;GO:0015849;GO:0016043;GO:0019222;GO:0022607;GO:0023052;GO:0023061;GO:0032501;GO:0032502;GO:0032940;GO:0035264;GO:0040007;GO:0043009;GO:0043933;GO:0045184;GO:0046903;GO:0046907;GO:0046942;GO:…	GO:0001540;GO:0005488;GO:0005515;GO:0005543;GO:0005546;GO:0008289;GO:0035091	GO:0005634;GO:0005794;GO:0005886;GO:0008021;GO:0016020;GO:0016023;GO:0030135;GO:0030136;GO:0031410;GO:0031982;GO:0031988;GO:0032991;GO:0043226;GO:0043227;GO:0043229;GO:0043231;GO:0043234;GO:0044424;GO:0044444;GO:0044456;GO:0044464;GO:0048471
14.0798263549805	13.4561557769775	12.7024021148682	12.6125450134277	13.7839870452881	14.6453380584717	14.3612604141235	14.1055145263672	15.0014791488647	13.6436405181885	15.6232528686523	13.7680082321167	14.4373550415039	15.0635681152344	14.7923793792725	14.1714677810669	13.8785676956177	14.4654808044434	13.2868700027466	14.0900907516479	14.060718536377	14.0323438644409	13.6435899734497	13.2185392379761	13.8307332992554	13.8471565246582	14.1885099411011	14.184045791626	13.608060836792	12.8470888137817	12.861234664917	13.7047424316406					biological regulation;cellular macromolecule metabolic process;cellular metabolic process;cellular process;cellular protein metabolic process;immune response;immune system process;macromolecule metabolic process;macromolecule modification;metabolic process;mucosal immune response;negative regulation of biological process;negative regulation of biosynthetic process;negative regulation of cell comm…	binding;catalytic activity;cation binding;cysteine-type peptidase activity;DNA binding;hydrolase activity;ion binding;K63-linked polyubiquitin binding;metal ion binding;nucleic acid binding;peptidase activity;peptidase activity, acting on L-amino acid peptides;polyubiquitin binding;protein binding;small conjugating protein binding;small conjugating protein-specific protease activity;transition me…	cell part;cytoplasm;intracellular membrane-bounded organelle;intracellular organelle;intracellular part;membrane-bounded organelle;nucleus;organelle	biological regulation;cellular metabolic process;cellular process;immune system process;macromolecule metabolic process;macromolecule modification;metabolic process;primary metabolic process;protein metabolic process;protein modification by small protein conjugation or removal;protein modification process;response to stimulus	cell part;cytoplasm;intracellular membrane-bounded organelle;intracellular organelle;nucleus;organelle		OTU	AACTTT_UNKNOWN;ACCAAAG,MIR-9;ATGGYGGA_UNKNOWN;BENPORATH_NANOG_TARGETS;CAGGTG_V$E12_Q6;CATTGTYY_V$SOX9_B1;chr1q21;CREIGHTON_ENDOCRINE_THERAPY_RESISTANCE_2;CTAWWWATA_V$RSRFC4_Q2;CUI_TCF21_TARGETS_2_DN;CYTOPLASM;DELACROIX_RAR_BOUND_ES;FEVR_CTNNB1_TARGETS_UP;GCGSCMNTTT_UNKNOWN;GGGAGGRR_V$MAZ_Q6;GGGCGGR_V$SP1_Q6;GGGTGGRR_V$PAX4_03;GSE13411_NAIVE_VS_SWITCHED_MEMORY_BCELL_UP;GSE13484_12H_VS_3H_YF17D_VAC…	Completeproteome;Cytoplasm;Hydrolase;Immunity;Metal-binding;Nucleus;Phosphoprotein;Protease;Referenceproteome;Thiolprotease;Ublconjugationpathway;Zinc;Zinc-finger		GO:0000122;GO:0001817;GO:0001818;GO:0002251;GO:0002376;GO:0002385;GO:0006355;GO:0006357;GO:0006464;GO:0006955;GO:0008152;GO:0009889;GO:0009890;GO:0009892;GO:0009966;GO:0009968;GO:0009987;GO:0010468;GO:0010556;GO:0010558;GO:0010605;GO:0010627;GO:0010629;GO:0010646;GO:0010648;GO:0010741;GO:0016579;GO:0019219;GO:0019222;GO:0019538;GO:0023051;GO:0023057;GO:0031323;GO:0031324;GO:0031326;GO:0031327;GO:…	GO:0003676;GO:0003677;GO:0003824;GO:0004843;GO:0005488;GO:0005515;GO:0008233;GO:0008234;GO:0008270;GO:0016787;GO:0019783;GO:0031593;GO:0032182;GO:0043130;GO:0043167;GO:0043169;GO:0046872;GO:0046914;GO:0070011;GO:0070530	GO:0005634;GO:0005737;GO:0043226;GO:0043227;GO:0043229;GO:0043231;GO:0044424;GO:0044464
14.6783094406128	13.3893671035767	14.4519863128662	14.0808258056641	14.2235279083252	13.7643222808838	13.3388090133667	13.7668504714966	13.8302564620972	14.0458936691284	13.3226823806763	13.9691247940063	15.1182146072388	14.1351833343506	13.4798860549927	14.4535970687866	13.5278491973877	13.867359161377	14.7463502883911	14.3762645721436	13.7377948760986	14.304874420166	12.5749826431274	14.0713653564453	13.7427473068237	14.274133682251	15.3624029159546	13.1061639785767	14.7281093597412	13.6589965820313	13.6351175308228	14.6794090270996					cation transport;establishment of localization;ion transport;metal ion transport;monovalent inorganic cation transport;potassium ion transport;transport	active transmembrane transporter activity;adenyl nucleotide binding;adenyl ribonucleotide binding;ATP binding;ATPase activity;ATPase activity, coupled;ATPase activity, coupled to movement of substances;ATPase activity, coupled to transmembrane movement of substances;binding;catalytic activity;hydrolase activity;hydrolase activity, acting on acid anhydrides;hydrolase activity, acting on acid anhyd…	cation channel complex;cell part;ion channel complex;macromolecular complex;membrane;membrane part;plasma membrane;plasma membrane part;potassium channel complex;protein complex;voltage-gated potassium channel complex	establishment of localization;ion transport;transport	cell part;macromolecular complex;membrane;plasma membrane;protein complex	ABC transporters;Type II diabetes mellitus	ABC_membrane;ABC_tran	ACEVEDO_METHYLATED_IN_LIVER_CANCER_DN;ADENYL_NUCLEOTIDE_BINDING;ADENYL_RIBONUCLEOTIDE_BINDING;ATP_BINDING;BENPORATH_EED_TARGETS;BENPORATH_ES_WITH_H3K27ME3;BENPORATH_PRC2_TARGETS;BENPORATH_SUZ12_TARGETS;BYSTRYKH_HEMATOPOIESIS_STEM_CELL_QTL_TRANS;CATION_TRANSMEMBRANE_TRANSPORTER_ACTIVITY;CATION_TRANSPORT;chr11p15;ESTABLISHMENT_OF_LOCALIZATION;GRAESSMANN_APOPTOSIS_BY_SERUM_DEPRIVATION_UP;GRAESSMANN_…	ATP-binding;Completeproteome;Nucleotide-binding;Referenceproteome;Repeat		GO:0006810;GO:0006811;GO:0006812;GO:0006813;GO:0015672;GO:0030001;GO:0051234	GO:0000166;GO:0003824;GO:0004871;GO:0004872;GO:0004888;GO:0005215;GO:0005488;GO:0005515;GO:0005524;GO:0008281;GO:0015399;GO:0015405;GO:0016462;GO:0016787;GO:0016817;GO:0016818;GO:0016820;GO:0016887;GO:0017076;GO:0017111;GO:0022804;GO:0022857;GO:0030554;GO:0032553;GO:0032555;GO:0032559;GO:0035639;GO:0038023;GO:0042623;GO:0042626;GO:0043492;GO:0044325;GO:0060089	GO:0005886;GO:0008076;GO:0016020;GO:0032991;GO:0034702;GO:0034703;GO:0034705;GO:0043234;GO:0044425;GO:0044459;GO:0044464
12.985011100769	17.0760841369629	13.7850437164307	13.466290473938	17.2573699951172	13.6018905639648	14.921838760376	14.212366104126	14.1115999221802	14.3015079498291	17.6698265075684	14.3873414993286	17.7358207702637	13.9840717315674	13.5624809265137	17.1929664611816	13.147928237915	14.2893686294556	13.249810218811	16.5889492034912	14.909462928772	13.7749910354614	14.0471725463867	18.0118160247803	17.4266910552979	14.4404230117798	17.6872253417969	17.5412483215332	14.1698579788208	13.9595766067505	14.9631004333496	14.4434270858765					biological regulation;cell surface receptor linked signaling pathway;cellular process;cellular response to stimulus;G-protein coupled receptor protein signaling pathway;regulation of biological process;regulation of cellular process;response to stimulus;signal transduction	molecular transducer activity;signal transducer activity	cell part;extrinsic to internal side of plasma membrane;extrinsic to membrane;extrinsic to plasma membrane;heterotrimeric G-protein complex;intracellular part;macromolecular complex;membrane part;plasma membrane part;protein complex	biological regulation;cellular process;response to stimulus;signal transduction	cell part;macromolecular complex;protein complex	Chemokine signaling pathway;MAPK signaling pathway;Regulation of actin cytoskeleton	G-gamma		Cellmembrane;Completeproteome;Lipoprotein;Membrane;Referenceproteome;Transducer		GO:0007165;GO:0007166;GO:0007186;GO:0009987;GO:0050789;GO:0050794;GO:0050896;GO:0051716;GO:0065007	GO:0004871;GO:0060089	GO:0005834;GO:0019897;GO:0019898;GO:0031234;GO:0032991;GO:0043234;GO:0044424;GO:0044425;GO:0044459;GO:0044464
12.8887844085693	13.539158821106	11.9467945098877	13.7144603729248	12.2516565322876	14.0773277282715	13.1755342483521	13.9249095916748	14.8187112808228	14.1918306350708	13.0514783859253	13.9389181137085	13.969633102417	14.5206279754639	14.4219274520874	13.5050668716431	13.907735824585	13.6167783737183	13.196310043335	13.7019805908203	13.9638652801514	13.1164255142212	14.9047288894653	14.3445053100586	13.4139347076416	13.556266784668	15.1699800491333	13.9629859924316	13.5219745635986	13.1100759506226	15.2378940582275	13.7923469543457							cell part;cytoplasm;intracellular part		cell part;cytoplasm		Ank_2	chr1q21;GSE14769_20MIN_VS_360MIN_LPS_BMDM_DN;GSE15659_NAIVE_CD4_TCELL_VS_ACTIVATED_TREG_UP;GSE15659_NAIVE_CD4_TCELL_VS_RESTING_TREG_UP;GSE15659_RESTING_VS_ACTIVATED_TREG_UP;GSE17974_IL4_AND_ANTI_IL12_VS_UNTREATED_4H_ACT_CD4_TCELL_DN;GSE18791_UNSTIM_VS_NEWCATSLE_VIRUS_DC_18H_DN;GSE20366_EX_VIVO_VS_HOMEOSTATIC_CONVERSION_TREG_DN;GSE37416_12H_VS_48H_F_TULARENSIS_LVS_NEUTROPHIL_DN;IWANAGA_CARCINOGENE…	ANKrepeat;Completeproteome;Referenceproteome;Repeat				GO:0005737;GO:0044424;GO:0044464
13.7380437850952	14.1679792404175	12.6940488815308	15.1019716262817	13.0484199523926	13.7520208358765	13.1965999603271	13.1084356307983	13.0384092330933	14.0509614944458	13.4032382965088	12.8303775787354	13.685004234314	14.7845029830933	12.6084260940552	13.7121267318726	13.3984451293945	14.633957862854	14.4245300292969	14.4334125518799	13.1542234420776	14.3989229202271	14.7852573394775	14.0422134399414	13.9693832397461	13.5217943191528	13.7610092163086	13.7263116836548	13.5318546295166	13.7148418426514	14.0141668319702	13.8618240356445													Completeproteome;Proteomicsidentification;Referenceproteome
14.0440721511841	12.6305952072144	13.3058490753174	13.5952377319336	13.6362991333008	13.8414602279663	14.0881443023682	13.9774389266968	13.4591016769409	13.0394916534424	16.2468700408936	13.5473508834839	13.4882678985596	14.1662693023682	16.4114112854004	13.9245557785034	14.4821119308472	13.9435138702393	16.5194206237793	14.3516426086426	13.4315891265869	13.6601114273071	17.573263168335	15.2043056488037	14.2577705383301	15.8766851425171	13.7865028381348	12.8926258087158	14.1201028823853	17.9582691192627	13.9095487594604	13.9799242019653					cellular process;establishment of localization;transport;vesicle-mediated transport		cell part;cytoplasmic part;Golgi apparatus;intracellular membrane-bounded organelle;intracellular organelle;intracellular part;membrane-bounded organelle;organelle	cellular process;establishment of localization;transport;vesicle-mediated transport	cell part;Golgi apparatus;intracellular membrane-bounded organelle;intracellular organelle;organelle		Foie-gras_1;Gryzun-like		Acetylation;Alternativesplicing;Completeproteome;ER-Golgitransport;Golgiapparatus;Referenceproteome;Transport		GO:0006810;GO:0009987;GO:0016192;GO:0051234		GO:0005794;GO:0043226;GO:0043227;GO:0043229;GO:0043231;GO:0044424;GO:0044444;GO:0044464
13.5717449188232	12.8334102630615	13.1038274765015	14.0159702301025	14.4905376434326	13.6799364089966	13.850772857666	13.7030382156372	13.5069561004639	14.0887880325317	13.8285102844238	13.8515005111694	15.0871000289917	12.841609954834	14.1668691635132	12.908317565918	14.9993391036987	14.2203960418701	13.9656038284302	15.3768033981323	14.2933130264282	14.1763963699341	14.1387624740601	14.7157773971558	14.5551013946533	14.4962291717529	14.0195693969727	13.6467752456665	14.67551612854	13.7417879104614	12.3220481872559	13.5924310684204					biological regulation;negative regulation of actin filament bundle assembly;negative regulation of biological process;negative regulation of cellular component organization;negative regulation of cellular process;negative regulation of cytoskeleton organization;negative regulation of establishment of protein localization in plasma membrane;negative regulation of organelle organization;negative re…		adherens junction;anchoring junction;cell junction;cell part;cell-substrate adherens junction;cell-substrate junction;cytoplasm;focal adhesion;intracellular part	biological regulation;regulation of organelle organization	cell part;cytoplasm		SAM_1;SAM_2	ACACTAC,MIR-142-3P;BLALOCK_ALZHEIMERS_DISEASE_UP;BROWNE_HCMV_INFECTION_14HR_UP;BROWNE_HCMV_INFECTION_16HR_UP;BROWNE_HCMV_INFECTION_18HR_UP;BROWNE_HCMV_INFECTION_8HR_UP;CACTGCC,MIR-34A,MIR-34C,MIR-449;CELL_MATRIX_ADHESION;CELL_SUBSTRATE_ADHESION;chr11q13;CROMER_TUMORIGENESIS_UP;CYTOPLASM;DACOSTA_UV_RESPONSE_VIA_ERCC3_COMMON_DN;DACOSTA_UV_RESPONSE_VIA_ERCC3_DN;DANG_BOUND_BY_MYC;DING_LUNG_CANCER_EXP…	Completeproteome;Proteomicsidentification;Referenceproteome		GO:0010639;GO:0032231;GO:0032232;GO:0032879;GO:0032880;GO:0032956;GO:0032970;GO:0033043;GO:0044087;GO:0048519;GO:0048523;GO:0050789;GO:0050794;GO:0051128;GO:0051129;GO:0051492;GO:0051493;GO:0051494;GO:0051497;GO:0060341;GO:0065007;GO:0070201;GO:0090003;GO:0090005		GO:0005737;GO:0005912;GO:0005924;GO:0005925;GO:0030054;GO:0030055;GO:0044424;GO:0044464;GO:0070161
13.7586345672607	14.0235815048218	13.7404861450195	13.8887090682983	15.966010093689	14.2493276596069	14.1759395599365	13.7457294464111	13.8735723495483	15.2707328796387	13.7289218902588	14.7862691879272	13.9821577072144	14.1486740112305	14.4912891387939	14.7742204666138	15.4698801040649	14.2896413803101	14.7233438491821	13.7588663101196	13.6702108383179	13.5344390869141	14.2145175933838	14.8087596893311	14.8016576766968	13.8411979675293	13.974232673645	14.8676652908325	15.0876483917236	12.653715133667	14.3617305755615	13.92054271698											Ank;Ank_2;Ank_3	BERNARD_PPAPDC1B_TARGETS_UP;chr2q33;CTTTGA_V$LEF1_Q2;GATAAGR_V$GATA_C;GCNP_SHH_UP_EARLY.V1_DN;GOBERT_OLIGODENDROCYTE_DIFFERENTIATION_DN;GSE10094_LCMV_VS_LISTERIA_IND_EFF_CD4_TCELL_UP;GSE12366_PLASMA_CELL_VS_MEMORY_BCELL_DN;GSE14308_TH1_VS_TH17_UP;GSE14308_TH17_VS_NATURAL_TREG_DN;GSE16522_ANTI_CD3CD28_STIM_VS_UNSTIM_MEMORY_CD8_TCELL_DN;GSE17721_12H_VS_24H_PAM3CSK4_BMDM_DN;GSE17721_4_VS_24H_CPG_BMD…	ANKrepeat;Completeproteome;Referenceproteome;Repeat
14.9456720352173	16.0576324462891	15.5895051956177	13.6340293884277	14.9924068450928	15.4784536361694	15.8321981430054	15.256688117981	15.3573112487793	15.2713174819946	15.8453187942505	16.3070049285889	16.3813400268555	16.0776920318604	15.2753973007202	13.5020818710327	13.2955675125122	15.6710987091064	14.7657518386841	15.8669166564941	15.8575677871704	16.3777351379395	16.0818157196045	15.6672506332397	15.8149576187134	13.1375579833984	15.8045845031738	13.4561643600464	14.9091901779175	15.7554092407227	15.6964635848999	16.0839576721191					anatomical structure development;anatomical structure formation involved in morphogenesis;biological regulation;brain development;cell proliferation;cell surface receptor linked signaling pathway;cellular process;cellular response to stimulus;developmental process;neural precursor cell proliferation;neural tube closure;neuroblast proliferation;organ development;positive regulation of axonogenesis…	molecular transducer activity;receptor activity;semaphorin receptor activity;signal transducer activity;signaling receptor activity;transmembrane signaling receptor activity	cell part;cell surface;extracellular membrane-bounded organelle;extracellular organelle;extracellular region part;extracellular vesicular exosome;integral to membrane;integral to plasma membrane;intracellular;intrinsic to membrane;intrinsic to plasma membrane;membrane part;membrane-bounded organelle;membrane-bounded vesicle;organelle;plasma membrane part;vesicle	anatomical structure development;anatomical structure formation involved in morphogenesis;biological regulation;cell proliferation;cellular process;developmental process;regulation of protein modification process;response to stimulus;signal transduction	cell part;cell surface;extracellular organelle;intracellular;organelle;vesicle	Axon guidance	Plexin_cytopl;PSI;Sema;TIG	AMUNDSON_DNA_DAMAGE_RESPONSE_TP53;BAELDE_DIABETIC_NEPHROPATHY_DN;BLALOCK_ALZHEIMERS_DISEASE_INCIPIENT_UP;BLALOCK_ALZHEIMERS_DISEASE_UP;BURTON_ADIPOGENESIS_7;BURTON_ADIPOGENESIS_8;BYSTRYKH_HEMATOPOIESIS_STEM_CELL_QTL_TRANS;CAIRO_HEPATOBLASTOMA_CLASSES_DN;CHEN_METABOLIC_SYNDROM_NETWORK;chr22q13;DEBIASI_APOPTOSIS_BY_REOVIRUS_INFECTION_DN;DELYS_THYROID_CANCER_UP;ESC_J1_UP_LATE.V1_UP;ESC_V6.5_UP_LATE.…	Cellmembrane;Completeproteome;Developmentalprotein;Disulfidebond;Glycoprotein;Membrane;Phosphoprotein;Receptor;Referenceproteome;Repeat;Signal;Transmembrane;Transmembranehelix		GO:0001843;GO:0001932;GO:0006140;GO:0007165;GO:0007166;GO:0007405;GO:0007420;GO:0008283;GO:0008360;GO:0009894;GO:0009987;GO:0010720;GO:0010769;GO:0010975;GO:0019219;GO:0019220;GO:0019222;GO:0022603;GO:0022604;GO:0030811;GO:0031323;GO:0031329;GO:0031344;GO:0031346;GO:0031399;GO:0032268;GO:0032502;GO:0033121;GO:0033124;GO:0035148;GO:0042325;GO:0043087;GO:0045595;GO:0045597;GO:0045664;GO:0048513;GO:…	GO:0004871;GO:0004872;GO:0004888;GO:0017154;GO:0038023;GO:0060089	GO:0005622;GO:0005887;GO:0009986;GO:0016021;GO:0031224;GO:0031226;GO:0031982;GO:0031988;GO:0043226;GO:0043227;GO:0043230;GO:0044421;GO:0044425;GO:0044459;GO:0044464;GO:0065010;GO:0070062
13.9970827102661	13.7748336791992	14.1010789871216	14.1646709442139	13.7373476028442	14.1309261322021	11.9939746856689	13.7280387878418	13.9906740188599	15.1042995452881	13.9282197952271	14.1394529342651	14.1022930145264	12.7634716033936	14.0068264007568	13.6551828384399	14.0394115447998	14.9967918395996	13.7502365112305	12.7768096923828	13.3584547042847	14.2812576293945	13.4123163223267	13.3227443695068	13.3129253387451	13.9030094146729	15.1804447174072	13.1850023269653	13.6912994384766	13.8264064788818	13.5537815093994	14.763786315918					apoptosis;biological regulation;cell death;cellular macromolecule metabolic process;cellular metabolic process;cellular nitrogen compound metabolic process;cellular process;death;macromolecule metabolic process;metabolic process;mRNA metabolic process;mRNA processing;nitrogen compound metabolic process;nucleic acid metabolic process;nucleobase-containing compound metabolic process;primary metabol…	binding;mRNA binding;nucleic acid binding;nucleotide binding;RNA binding	cell part;cytoplasm;intracellular organelle part;intracellular part;nuclear body;nuclear part;nuclear speck;nucleoplasm part;organelle part	biological regulation;cell death;cellular metabolic process;cellular nitrogen compound metabolic process;cellular process;death;macromolecule metabolic process;metabolic process;mRNA metabolic process;mRNA processing;nitrogen compound metabolic process;nucleobase-containing compound metabolic process;primary metabolic process;RNA metabolic process;RNA processing;RNA splicing	cell part;cytoplasm	Spliceosome	PWI;RRM_1	AATGTGA,MIR-23A,MIR-23B;ACEVEDO_LIVER_TUMOR_VS_NORMAL_ADJACENT_TISSUE_DN;BILD_CTNNB1_ONCOGENIC_SIGNATURE;BILD_E2F3_ONCOGENIC_SIGNATURE;BRUINS_UVC_RESPONSE_VIA_TP53_GROUP_D;BUYTAERT_PHOTODYNAMIC_THERAPY_STRESS_UP;chr14q24;CTACTGT,MIR-199A;DELASERNA_MYOD_TARGETS_UP;DURCHDEWALD_SKIN_CARCINOGENESIS_DN;FONTAINE_FOLLICULAR_THYROID_ADENOMA_UP;FOURNIER_ACINAR_DEVELOPMENT_LATE_2;GARY_CD5_TARGETS_DN;GAZDA_…	Acetylation;Apoptosis;Completeproteome;Cytoplasm;Isopeptidebond;mRNAprocessing;mRNAsplicing;Nucleus;Phosphoprotein;Referenceproteome;RNA-binding;Ublconjugation		GO:0000381;GO:0006139;GO:0006396;GO:0006397;GO:0006807;GO:0006915;GO:0008152;GO:0008219;GO:0008380;GO:0009987;GO:0010468;GO:0010941;GO:0012501;GO:0016070;GO:0016071;GO:0016265;GO:0019219;GO:0019222;GO:0031323;GO:0034641;GO:0042981;GO:0043067;GO:0043170;GO:0043484;GO:0044237;GO:0044238;GO:0044260;GO:0048024;GO:0050684;GO:0050789;GO:0050794;GO:0051171;GO:0051252;GO:0060255;GO:0065007;GO:0080090;GO:…	GO:0000166;GO:0003676;GO:0003723;GO:0003729;GO:0005488	GO:0005737;GO:0016604;GO:0016607;GO:0044422;GO:0044424;GO:0044428;GO:0044446;GO:0044451;GO:0044464
14.5928077697754	14.0939245223999	14.2697114944458	15.685022354126	14.0227880477905	14.398476600647	15.7134943008423	13.3904323577881	14.0400848388672	13.9893054962158	15.5201177597046	15.0526647567749	13.4510307312012	14.1909055709839	13.0265588760376	13.1038761138916	15.800874710083	13.4857158660889	15.2304334640503	15.1436004638672	14.5378017425537	14.2382717132568	13.3903036117554	14.9892845153809	14.1393203735352	14.8800621032715	13.6495161056519	15.5361557006836	15.2705869674683	13.6367769241333	14.3175096511841	13.0812835693359					anatomical structure development;anatomical structure homeostasis;biological regulation;cell differentiation;cellular developmental process;cellular process;developmental process;establishment of localization;establishment of localization in cell;homeostasis of number of cells;homeostasis of number of cells within a tissue;homeostatic process;hormone secretion;hormone transport;insulin secretion;…		cell part;cytoplasmic part;endoplasmic reticulum membrane;endoplasmic reticulum part;integral to membrane;intracellular organelle part;intracellular part;intrinsic to membrane;membrane;membrane part;organelle membrane;organelle part	anatomical structure development;biological regulation;cell differentiation;cellular process;developmental process;establishment of localization;homeostatic process;hormone transport;peptide transport;response to chemical stimulus;response to stimulus;secretion;transport	cell part;membrane		LSR	AACTTT_UNKNOWN;BENPORATH_EED_TARGETS;BENPORATH_ES_WITH_H3K27ME3;BENPORATH_PRC2_TARGETS;BENPORATH_SUZ12_TARGETS;BRUINS_UVC_RESPONSE_VIA_TP53_GROUP_A;CAGGTG_V$E12_Q6;CAGTCAC,MIR-134;chr1q24;CUI_TCF21_TARGETS_2_DN;GGGAGGRR_V$MAZ_Q6;GSE13738_TCR_VS_BYSTANDER_ACTIVATED_CD4_TCELL_UP;GSE14000_TRANSLATED_RNA_VS_MRNA_16H_LPS_DC_UP;GSE17974_CTRL_VS_ACT_IL4_AND_ANTI_IL12_6H_CD4_TCELL_DN;GSE25087_FETAL_VS_AD…	Completeproteome;Disulfidebond;Endoplasmicreticulum;Immunoglobulindomain;Membrane;Referenceproteome;Signal;Transmembrane;Transmembranehelix		GO:0001894;GO:0002790;GO:0006810;GO:0009743;GO:0009746;GO:0009749;GO:0009914;GO:0009987;GO:0010033;GO:0010817;GO:0015833;GO:0023061;GO:0030072;GO:0030073;GO:0030154;GO:0031016;GO:0032502;GO:0032940;GO:0034284;GO:0042221;GO:0042592;GO:0046879;GO:0046903;GO:0048513;GO:0048856;GO:0048869;GO:0048872;GO:0048873;GO:0050896;GO:0051234;GO:0051649;GO:0060249;GO:0065007;GO:0065008		GO:0005789;GO:0016020;GO:0016021;GO:0031090;GO:0031224;GO:0044422;GO:0044424;GO:0044425;GO:0044432;GO:0044444;GO:0044446;GO:0044464
15.2284049987793	14.9779949188232	15.4235754013062	15.0400323867798	15.5204038619995	15.0542650222778	15.6565370559692	15.2194328308105	15.4918222427368	15.9015502929688	15.1331424713135	14.935302734375	15.7824354171753	15.9083223342896	15.1884346008301	15.208158493042	15.0888299942017	15.2004384994507	15.608283996582	15.691143989563	13.8889427185059	15.5895338058472	15.1932554244995	15.7415456771851	14.8981761932373	15.3810701370239	15.7651567459106	14.5532093048096	13.6596269607544	15.6838722229004	15.636794090271	15.2788124084473					biological regulation;cell cycle phase;cell cycle process;cell division;cellular component organization;cellular component organization at cellular level;cellular component organization or biogenesis;cellular component organization or biogenesis at cellular level;cellular process;mitosis;nuclear division;organelle fission;organelle organization;regulation of actin cytoskeleton organization;regula…	actin binding;actin filament binding;binding;cytoskeletal protein binding;enzyme binding;protein binding;ubiquitin protein ligase binding	actin cytoskeleton;adherens junction;anchoring junction;cell junction;cell part;cell-substrate adherens junction;cell-substrate junction;cytoplasm;cytoplasmic part;cytoskeletal part;cytoskeleton;focal adhesion;intracellular membrane-bounded organelle;intracellular non-membrane-bounded organelle;intracellular organelle;intracellular organelle part;intracellular part;membrane-bounded organelle;micr…	biological regulation;cell division;cellular component organization;cellular process;mitosis;nuclear division;organelle fission;organelle organization;regulation of organelle organization	cell part;cytoplasm;cytoskeleton;intracellular membrane-bounded organelle;intracellular non-membrane-bounded organelle;intracellular organelle;microtubule organizing center;midbody;nucleus;organelle;synapse		PH;SAM_1;SAM_2	ASTON_MAJOR_DEPRESSIVE_DISORDER_UP;BAELDE_DIABETIC_NEPHROPATHY_DN;BILD_MYC_ONCOGENIC_SIGNATURE;BLALOCK_ALZHEIMERS_DISEASE_UP;BROWNE_HCMV_INFECTION_18HR_DN;CCACACA,MIR-147;CHEMNITZ_RESPONSE_TO_PROSTAGLANDIN_E2_DN;CHEN_LIVER_METABOLISM_QTL_CIS;chr1q32;chr22q13;CONCANNON_APOPTOSIS_BY_EPOXOMICIN_DN;DAIRKEE_CANCER_PRONE_RESPONSE_E2;DAVICIONI_TARGETS_OF_PAX_FOXO1_FUSIONS_DN;DELASERNA_MYOD_TARGETS_UP;EL…	Actin-binding;Alternativesplicing;Cellcycle;Celldivision;Coiledcoil;Completeproteome;Cytoplasm;Cytoskeleton;Mitosis;Nucleus;Phosphoprotein;Proteomicsidentification;Referenceproteome;Ublconjugation		GO:0000280;GO:0006996;GO:0007067;GO:0009987;GO:0016043;GO:0022402;GO:0022403;GO:0032956;GO:0032970;GO:0033043;GO:0048285;GO:0050789;GO:0050794;GO:0051128;GO:0051301;GO:0051493;GO:0065007;GO:0071840;GO:0071841;GO:0071842	GO:0003779;GO:0005488;GO:0005515;GO:0008092;GO:0019899;GO:0031625;GO:0051015	GO:0005634;GO:0005737;GO:0005815;GO:0005856;GO:0005912;GO:0005924;GO:0005925;GO:0015629;GO:0030054;GO:0030055;GO:0030496;GO:0043226;GO:0043227;GO:0043228;GO:0043229;GO:0043231;GO:0043232;GO:0044422;GO:0044424;GO:0044430;GO:0044444;GO:0044446;GO:0044456;GO:0044464;GO:0045202;GO:0048786;GO:0070161
14.1449766159058	13.9647254943848	15.8095922470093	15.4316930770874	15.2624616622925	15.6497049331665	15.4542675018311	15.1433038711548	13.9553899765015	15.4740228652954	14.7087068557739	15.0169820785522	14.9388904571533	14.516806602478	14.9491424560547	15.0887880325317	13.4995584487915	15.8586368560791	15.4207172393799	14.3674383163452	15.575569152832	15.3198480606079	15.2365379333496	14.3248834609985	14.3202362060547	15.9748182296753	15.2767772674561	12.7568216323853	14.8664093017578	15.3783626556396	14.7766904830933	15.9846858978271					biological regulation;cell differentiation;cellular component biogenesis;cellular component biogenesis at cellular level;cellular component organization or biogenesis;cellular component organization or biogenesis at cellular level;cellular developmental process;cellular macromolecule metabolic process;cellular metabolic process;cellular process;cellular protein metabolic process;chaperone-mediate…	binding;cytoskeletal protein binding;ganglioside binding;glycolipid binding;glycosphingolipid binding;lipid binding;microtubule binding;protein binding;sphingolipid binding;tubulin binding	cell part;cytoplasmic part;early endosome membrane;endosomal part;endosome membrane;Golgi apparatus part;Golgi membrane;Golgi stack;intracellular organelle part;intracellular part;membrane;membrane part;membrane raft;organelle membrane;organelle part;plasma membrane;recycling endosome membrane;trans-Golgi network;trans-Golgi network membrane	biological regulation;cell differentiation;cellular metabolic process;cellular process;developmental process;establishment of localization;macromolecule metabolic process;macromolecule modification;metabolic process;peptidyl-amino acid modification;primary metabolic process;protein acylation;protein lipidation;protein metabolic process;protein modification process;protein transport;regulation of …	cell part;membrane;plasma membrane		Ank_2;CAP_GLY	BAELDE_DIABETIC_NEPHROPATHY_DN;BLALOCK_ALZHEIMERS_DISEASE_DN;BLALOCK_ALZHEIMERS_DISEASE_INCIPIENT_DN;BMI1_DN.V1_DN;BMI1_DN_MEL18_DN.V1_DN;BROWNE_HCMV_INFECTION_18HR_DN;BRUINS_UVC_RESPONSE_VIA_TP53_GROUP_A;CCTGAGT,MIR-510;CHICAS_RB1_TARGETS_CONFLUENT;chr19q13;CTTGTAT,MIR-381;GCACCTT,MIR-18A,MIR-18B;GCM_CALM1;GCM_MAP4K4;GCM_MAPK10;GGGAGGRR_V$MAZ_Q6;GGGGCCC,MIR-296;GGGTGGRR_V$PAX4_03;GNF2_AF1Q;GNF2_…	3D-structure;ANKrepeat;Cellmembrane;Completeproteome;Cytoplasm;Golgiapparatus;Lipoprotein;Membrane;Palmitate;Referenceproteome;Repeat		GO:0001932;GO:0001934;GO:0006464;GO:0006497;GO:0006810;GO:0008152;GO:0009893;GO:0009987;GO:0010562;GO:0010604;GO:0010639;GO:0010827;GO:0010828;GO:0010941;GO:0010942;GO:0015031;GO:0018193;GO:0018198;GO:0018230;GO:0018231;GO:0018345;GO:0019220;GO:0019222;GO:0019538;GO:0030100;GO:0030154;GO:0031110;GO:0031111;GO:0031113;GO:0031115;GO:0031323;GO:0031325;GO:0031333;GO:0031399;GO:0031401;GO:0032268;GO:…	GO:0005488;GO:0005515;GO:0008017;GO:0008092;GO:0008289;GO:0015631;GO:0035594;GO:0043208;GO:0046625;GO:0051861	GO:0000139;GO:0005795;GO:0005802;GO:0005886;GO:0010008;GO:0016020;GO:0031090;GO:0031901;GO:0032588;GO:0044422;GO:0044424;GO:0044425;GO:0044431;GO:0044440;GO:0044444;GO:0044446;GO:0044464;GO:0045121;GO:0055038
15.974907875061	16.4364032745361	16.2452373504639	15.2363510131836	16.0185699462891	15.9804077148438	16.0581398010254	16.2162532806396	16.4525470733643	16.0360012054443	16.456033706665	16.4990673065186	16.5451145172119	16.5693511962891	15.5094966888428	16.1178665161133	15.3660831451416	16.7246742248535	16.2607727050781	17.0893878936768	16.5775756835938	16.0392608642578	15.7552270889282	16.846960067749	16.577709197998	16.3387184143066	16.9143848419189	16.4479064941406	15.9373970031738	17.0622367858887	16.4387435913086	16.668025970459					biological regulation;cellular component organization;cellular component organization at cellular level;cellular component organization or biogenesis;cellular component organization or biogenesis at cellular level;cellular process;cellular response to stimulus;cytoskeleton organization;intracellular signal transduction;organelle organization;regulation of anatomical structure morphogenesis;regula…	binding;cation binding;ion binding;metal ion binding	cell part;membrane	biological regulation;cellular component organization;cellular process;cytoskeleton organization;organelle organization;response to stimulus;signal transduction	cell part;membrane		C1_1;PDZ_2	ACEVEDO_METHYLATED_IN_LIVER_CANCER_DN;chr10q26;GAZDA_DIAMOND_BLACKFAN_ANEMIA_PROGENITOR_DN;GRADE_COLON_CANCER_UP;GSE11924_TFH_VS_TH2_CD4_TCELL_DN;GSE13411_NAIVE_BCELL_VS_PLASMA_CELL_UP;GSE13411_SWITCHED_MEMORY_BCELL_VS_PLASMA_CELL_UP;GSE14000_TRANSLATED_RNA_VS_MRNA_4H_LPS_DC_DN;GSE17974_0.5H_VS_72H_IL4_AND_ANTI_IL12_ACT_CD4_TCELL_UP;GSE17974_0.5H_VS_72H_UNTREATED_IN_VITRO_CD4_TCELL_UP;GSE17974_1H…	Completeproteome;Metal-binding;Proteomicsidentification;Referenceproteome;Zinc		GO:0006996;GO:0007010;GO:0007165;GO:0009987;GO:0016043;GO:0022603;GO:0022604;GO:0035556;GO:0050789;GO:0050793;GO:0050794;GO:0050896;GO:0051128;GO:0051716;GO:0065007;GO:0071840;GO:0071841;GO:0071842	GO:0005488;GO:0043167;GO:0043169;GO:0046872	GO:0016020;GO:0044464
14.7189607620239	15.2414245605469	16.0805473327637	16.0377407073975	13.8736944198608	12.6299390792847	15.0452899932861	15.1501836776733	15.2139015197754	16.4579734802246	15.2249441146851	13.50403881073	15.4285955429077	16.0820655822754	14.5956649780273	15.6640024185181	12.8107633590698	14.6761932373047	16.5000629425049	15.5042295455933	12.5918416976929	15.6095542907715	15.6674165725708	16.4326877593994	15.5740909576416	16.3950328826904	13.5957489013672	14.6398496627808	15.3856935501099	16.4434623718262	15.2285842895508	15.1048030853271					biological regulation;cell differentiation;cellular developmental process;cellular localization;cellular macromolecule localization;cellular process;cellular protein localization;developmental process;establishment of localization;fat cell differentiation;lipid transport;localization;macromolecule localization;negative regulation of biological process;negative regulation of cell migration;negativ…	binding;cholesterol binding;lipid binding;steroid binding;sterol binding	cell part;intracellular organelle part;intracellular part;membrane;nuclear membrane;nuclear part;organelle membrane;organelle part	biological regulation;cell differentiation;cellular localization;cellular process;developmental process;establishment of localization;lipid transport;localization;transport	cell part;membrane		Oxysterol_BP;PH	AAGCACT,MIR-520F;AATGTGA,MIR-23A,MIR-23B;AGCACTT,MIR-93,MIR-302A,MIR-302B,MIR-302C,MIR-302D,MIR-372,MIR-373,MIR-520E,MIR-520A,MIR-526B,MIR-520B,MIR-520C,MIR-520D;ATAACCT,MIR-154;ATTCTTT,MIR-186;CATTTCA,MIR-203;CHANG_CORE_SERUM_RESPONSE_DN;CHEN_METABOLIC_SYNDROM_NETWORK;CHICAS_RB1_TARGETS_SENESCENT;chr12q14;CTTTGA_V$LEF1_Q2;CUI_TCF21_TARGETS_2_DN;DACOSTA_UV_RESPONSE_VIA_ERCC3_COMMON_DN;DACOSTA_UV_…	Completeproteome;Lipidtransport;Proteomicsidentification;Referenceproteome;Transport		GO:0006810;GO:0006869;GO:0008104;GO:0009966;GO:0009967;GO:0009987;GO:0010627;GO:0010646;GO:0010647;GO:0010740;GO:0010883;GO:0010888;GO:0010889;GO:0010891;GO:0023051;GO:0023056;GO:0030154;GO:0030334;GO:0030336;GO:0032502;GO:0032879;GO:0033036;GO:0033365;GO:0034504;GO:0034613;GO:0040012;GO:0040013;GO:0045444;GO:0046626;GO:0046628;GO:0048518;GO:0048519;GO:0048522;GO:0048523;GO:0048583;GO:0048584;GO:…	GO:0005488;GO:0005496;GO:0008289;GO:0015485;GO:0032934	GO:0016020;GO:0031090;GO:0031965;GO:0044422;GO:0044424;GO:0044428;GO:0044446;GO:0044464
17.1445980072021	17.5332832336426	18.1216659545898	17.6424465179443	17.6698265075684	18.2618293762207	17.652494430542	17.6917972564697	17.3894462585449	18.3174304962158	17.2796649932861	17.5261936187744	17.4848709106445	17.3142471313477	17.6858577728271	17.7431373596191	17.668025970459	18.0030574798584	18.0407829284668	17.648006439209	18.1483268737793	18.0749359130859	18.2034244537354	17.7232074737549	16.811149597168	18.446008682251	17.6990032196045	18.2154674530029	17.8454895019531	17.7954444885254	17.4788017272949	17.7382640838623					anatomical structure development;brain development;developmental process;organ development		cell cortex;cell part;cell projection;cell projection part;clathrin-coated vesicle;coated vesicle;cytoplasmic membrane-bounded vesicle;cytoplasmic part;cytoplasmic vesicle;dendritic spine;intracellular membrane-bounded organelle;intracellular organelle;intracellular part;membrane-bounded organelle;membrane-bounded vesicle;neuron projection;neuron spine;organelle;synapse part;synaptic vesicle;vesi…	anatomical structure development;developmental process	cell cortex;cell part;cell projection;cytoplasmic membrane-bounded vesicle;intracellular membrane-bounded organelle;intracellular organelle;neuron projection;organelle;vesicle		Ank;Ank_2;CortBP2	AAGCCAT,MIR-135A,MIR-135B;chr7q31;CREIGHTON_ENDOCRINE_THERAPY_RESISTANCE_3;CUI_TCF21_TARGETS_2_DN;GGGACCA,MIR-133A,MIR-133B;GSE13485_DAY3_VS_DAY7_YF17D_VACCINE_PBMC_UP;GSE14000_UNSTIM_VS_16H_LPS_DC_TRANSLATED_RNA_UP;GSE14350_TREG_VS_TEFF_IN_IL2RB_KO_DN;GSE15659_NAIVE_CD4_TCELL_VS_NONSUPPRESSIVE_TCELL_UP;GSE15659_NAIVE_CD4_TCELL_VS_RESTING_TREG_UP;GSE15659_NAIVE_VS_PTPRC_NEG_CD4_TCELL_UP;GSE15750_…	Alternativesplicing;ANKrepeat;Cellprojection;Coiledcoil;Completeproteome;Cytoplasm;Phosphoprotein;Referenceproteome;Repeat		GO:0007420;GO:0032502;GO:0048513;GO:0048856		GO:0005938;GO:0008021;GO:0016023;GO:0030135;GO:0030136;GO:0031410;GO:0031982;GO:0031988;GO:0042995;GO:0043005;GO:0043197;GO:0043226;GO:0043227;GO:0043229;GO:0043231;GO:0044309;GO:0044424;GO:0044444;GO:0044456;GO:0044463;GO:0044464
13.665753364563	13.3605117797852	14.5161933898926	13.7817296981812	14.4713573455811	14.8826713562012	13.368540763855	14.4901514053345	14.7275838851929	13.8585481643677	15.9192762374878	12.8508968353271	14.8552551269531	14.123722076416	13.7904396057129	13.722674369812	13.6064004898071	13.1966276168823	13.5901565551758	13.0090093612671	13.629189491272	14.3787384033203	13.4575700759888	13.2150030136108	13.0812854766846	12.9520092010498	15.4264373779297	13.3073034286499	13.2370271682739	14.0289278030396	12.8897666931152	14.9529190063477							cell part;integral to membrane;intrinsic to membrane;membrane part		cell part			chr7q31;DAWSON_METHYLATED_IN_LYMPHOMA_TCL1;GSE32423_CTRL_VS_IL7_MEMORY_CD8_TCELL_DN;GSE7852_LN_VS_THYMUS_TCONV_UP;MIKKELSEN_MEF_HCP_WITH_H3K27ME3	Completeproteome;Membrane;Referenceproteome;Transmembrane;Transmembranehelix				GO:0016021;GO:0031224;GO:0044425;GO:0044464
21.0902290344238	21.8426456451416	20.9343070983887	20.3476524353027	20.7214221954346	21.4062900543213	21.1405849456787	21.476598739624	22.2769374847412	20.7081775665283	21.7162818908691	21.6748676300049	22.2526302337646	22.2092266082764	21.261323928833	21.8237266540527	21.0853099822998	21.4187469482422	20.689359664917	21.9813041687012	21.5526714324951	21.9233207702637	21.386323928833	21.9999294281006	21.7641353607178	20.695915222168	21.9458160400391	20.3729457855225	21.7426280975342	21.03173828125	22.0639476776123	21.8639698028564					anatomical structure morphogenesis;axonogenesis;behavior;biological regulation;cell differentiation;cell part morphogenesis;cell projection morphogenesis;cell projection organization;cellular component morphogenesis;cellular component organization;cellular component organization at cellular level;cellular component organization or biogenesis;cellular component organization or biogenesis at cellul…	catalytic activity;hydrolase activity;hydrolase activity, acting on ester bonds;phosphatase activity;phosphoprotein phosphatase activity;phosphoric ester hydrolase activity;protein tyrosine phosphatase activity	cell part;extracellular matrix;extracellular matrix part;extracellular region part;integral to membrane;intrinsic to membrane;membrane;membrane part;perineuronal net;plasma membrane;proteinaceous extracellular matrix	anatomical structure morphogenesis;behavior;biological regulation;cell differentiation;cellular component morphogenesis;cellular component organization;cellular metabolic process;cellular process;developmental process;macromolecule metabolic process;macromolecule modification;metabolic process;multicellular organismal process;neurological system process;phosphorus metabolic process;primary metabo…	cell part;extracellular matrix;membrane;plasma membrane;proteinaceous extracellular matrix	Epithelial cell signaling in Helicobacter pylori infection	Carb_anhydrase;fn3;Y_phosphatase	ALK_DN.V1_DN;ALONSO_METASTASIS_NEURAL_UP;ALONSO_METASTASIS_UP;ANATOMICAL_STRUCTURE_DEVELOPMENT;BENPORATH_ES_1;BERTUCCI_MEDULLARY_VS_DUCTAL_BREAST_CANCER_DN;BIOPOLYMER_METABOLIC_PROCESS;BIOPOLYMER_MODIFICATION;BRUINS_UVC_RESPONSE_LATE;CAGTATT,MIR-200B,MIR-200C,MIR-429;CELLULAR_MACROMOLECULE_METABOLIC_PROCESS;CELLULAR_PROTEIN_METABOLIC_PROCESS;CENTRAL_NERVOUS_SYSTEM_DEVELOPMENT;chr7q31;CREIGHTON_EN…	Cellmembrane;Completeproteome;Disulfidebond;Glycoprotein;Hydrolase;Membrane;Proteinphosphatase;Referenceproteome;Repeat;Secreted;Signal;Transmembrane;Transmembranehelix		GO:0002244;GO:0003008;GO:0006464;GO:0006470;GO:0006793;GO:0006796;GO:0007409;GO:0007610;GO:0007611;GO:0008152;GO:0009653;GO:0009987;GO:0010001;GO:0014013;GO:0016043;GO:0016311;GO:0019538;GO:0030030;GO:0030154;GO:0032501;GO:0032502;GO:0032989;GO:0032990;GO:0035335;GO:0042127;GO:0043170;GO:0043412;GO:0044237;GO:0044238;GO:0044260;GO:0044267;GO:0045595;GO:0048709;GO:0048812;GO:0048858;GO:0048869;GO:…	GO:0003824;GO:0004721;GO:0004725;GO:0016787;GO:0016788;GO:0016791;GO:0042578	GO:0005578;GO:0005886;GO:0016020;GO:0016021;GO:0031012;GO:0031224;GO:0044420;GO:0044421;GO:0044425;GO:0044464;GO:0072534
16.2091293334961	17.003604888916	16.3332767486572	16.3663215637207	15.9170694351196	16.5549926757813	16.1274509429932	16.4875106811523	16.6105060577393	15.5068035125732	17.3419532775879	17.4281635284424	17.4546680450439	17.3676872253418	16.1724662780762	16.7449131011963	14.4030122756958	16.8447551727295	14.3795137405396	17.3254451751709	16.6369361877441	17.2494277954102	17.0514430999756	16.7941112518311	17.0817127227783	15.668025970459	17.6785869598389	16.8061218261719	16.6397647857666	16.649621963501	17.3396072387695	17.2860889434814
13.1024866104126	12.6500463485718	14.0442237854004	13.8375110626221	13.1401166915894	14.1237916946411	13.8264179229736	13.4619092941284	13.6920680999756	13.4086961746216	15.0159511566162	14.1544647216797	14.1341152191162	14.4535284042358	13.3793640136719	13.2207012176514	13.5503034591675	13.4270706176758	14.4778356552124	14.4980144500732	13.8746910095215	13.6249303817749	13.9458208084106	13.8791227340698	12.5620794296265	13.6121139526367	14.9250440597534	13.1728963851929	13.7942934036255	13.7546110153198	13.4280776977539	13.4150905609131
13.5810899734497	12.5812292098999	13.628623008728	14.6787462234497	13.3737592697144	12.1753664016724	14.1805248260498	13.4720029830933	13.5958242416382	12.7850275039673	14.3086318969727	14.1128377914429	12.9921894073486	14.1931381225586	12.8222379684448	14.0713319778442	13.1946268081665	14.8531379699707	13.6726140975952	14.5719652175903	13.5138635635376	14.9299488067627	13.1139450073242	14.8144569396973	14.8977327346802	13.8970584869385	12.8527154922485	13.1065950393677	14.2187328338623	13.2468299865723	14.1310272216797	14.4961414337158					cellular component disassembly;cellular component disassembly at cellular level;cellular component organization;cellular component organization at cellular level;cellular component organization or biogenesis;cellular component organization or biogenesis at cellular level;cellular macromolecular complex disassembly;cellular macromolecular complex subunit organization;cellular macromolecule metabol…	binding;DNA binding;nucleic acid binding	cell part;chromosomal part;extracellular membrane-bounded organelle;extracellular organelle;extracellular region part;extracellular vesicular exosome;intracellular membrane-bounded organelle;intracellular organelle;intracellular organelle part;intracellular part;macromolecular complex;membrane-bounded organelle;membrane-bounded vesicle;nuclear chromosome part;nuclear nucleosome;nuclear part;nucle…	cellular component disassembly;cellular component organization;cellular metabolic process;cellular nitrogen compound metabolic process;cellular process;chromatin organization;chromosome organization;DNA metabolic process;DNA repair;macromolecule metabolic process;metabolic process;nitrogen compound metabolic process;nucleobase-containing compound metabolic process;organelle organization;primary m…	cell part;extracellular organelle;intracellular membrane-bounded organelle;intracellular organelle;macromolecular complex;nucleosome;nucleus;organelle;vesicle	Systemic lupus erythematosus	Histone	ACEVEDO_LIVER_CANCER_WITH_H3K27ME3_DN;ACEVEDO_LIVER_CANCER_WITH_H3K9ME3_DN;BENPORATH_CYCLING_GENES;BENPORATH_EED_TARGETS;BENPORATH_MYC_MAX_TARGETS;BENPORATH_NANOG_TARGETS;BENPORATH_NOS_TARGETS;BENPORATH_OCT4_TARGETS;BENPORATH_SOX2_TARGETS;BLALOCK_ALZHEIMERS_DISEASE_INCIPIENT_UP;BLALOCK_ALZHEIMERS_DISEASE_UP;BOCHKIS_FOXA2_TARGETS;BRACHAT_RESPONSE_TO_CAMPTOTHECIN_UP;BRACHAT_RESPONSE_TO_METHOTREXATE…	3D-structure;Acetylation;Chromosome;Citrullination;Completeproteome;DNA-binding;Isopeptidebond;Methylation;Nucleosomecore;Nucleus;Phosphoprotein;Referenceproteome;Ublconjugation		GO:0006139;GO:0006259;GO:0006281;GO:0006325;GO:0006337;GO:0006807;GO:0006950;GO:0006974;GO:0006996;GO:0008152;GO:0009987;GO:0016043;GO:0022411;GO:0032984;GO:0032986;GO:0033554;GO:0034621;GO:0034623;GO:0034641;GO:0034728;GO:0043170;GO:0043933;GO:0044237;GO:0044238;GO:0044260;GO:0050896;GO:0051276;GO:0051716;GO:0070914;GO:0071824;GO:0071840;GO:0071841;GO:0071842;GO:0071845;GO:0090304	GO:0003676;GO:0003677;GO:0005488	GO:0000786;GO:0000788;GO:0005634;GO:0031982;GO:0031988;GO:0032991;GO:0032993;GO:0043226;GO:0043227;GO:0043229;GO:0043230;GO:0043231;GO:0044421;GO:0044422;GO:0044424;GO:0044427;GO:0044428;GO:0044446;GO:0044454;GO:0044464;GO:0065010;GO:0070062
13.8003721237183	13.4522943496704	13.826563835144	12.9743366241455	13.5792837142944	13.8806562423706	13.3761510848999	13.8182573318481	14.4449195861816	14.8123435974121	13.713565826416	12.8467140197754	15.2007713317871	13.9349479675293	12.9911508560181	14.7709665298462	14.4031801223755	13.8433055877686	14.6882543563843	13.3571357727051	13.3940649032593	14.8860635757446	13.9303970336914	14.2963914871216	14.5658626556396	13.4432621002197	14.4599103927612	12.9519462585449	13.4698524475098	14.2541532516479	13.3388729095459	13.6305370330811
14.2058076858521	15.24889087677	15.7856569290161	13.569522857666	15.7903995513916	15.4165010452271	15.5508670806885	15.2405681610107	15.3417272567749	15.418116569519	16.0445652008057	15.63023853302	15.9979953765869	15.2022390365601	14.2174663543701	13.9089488983154	13.8611679077148	14.2520332336426	15.7048225402832	15.9376955032349	15.7630825042725	15.6378135681152	15.9162292480469	15.1914834976196	15.589241027832	15.2415361404419	15.9196548461914	15.6391143798828	14.1813564300537	16.0698909759521	16.0115985870361	15.145414352417					establishment of localization;establishment of localization in cell;establishment of protein localization;establishment of protein localization in mitochondrion;establishment of protein localization to organelle;intracellular protein transport;intracellular transport;mitochondrial transport;protein import;protein targeting;protein targeting to mitochondrion;protein transport;transport		cell part;cytoplasmic part;intracellular organelle part;intracellular part;membrane;mitochondrial membrane;mitochondrial outer membrane;mitochondrial part;organelle membrane;organelle outer membrane;organelle part;outer membrane	establishment of localization;protein targeting;protein transport;transport	cell part;membrane		GST_C_3;Tom37;Tom37_C	AACATTC,MIR-409-3P;AACTGGA,MIR-145;ACEVEDO_LIVER_CANCER_UP;ACEVEDO_LIVER_CANCER_WITH_H3K27ME3_UP;ACEVEDO_LIVER_TUMOR_VS_NORMAL_ADJACENT_TISSUE_UP;chr5q14;GSE13306_RA_VS_UNTREATED_TCONV_UP;GSE13493_CD4INTCD8POS_VS_CD8POS_THYMOCYTE_DN;GSE14000_UNSTIM_VS_4H_LPS_DC_UP;GSE17974_IL4_AND_ANTI_IL12_VS_UNTREATED_12H_ACT_CD4_TCELL_UP;GSE18791_CTRL_VS_NEWCASTLE_VIRUS_DC_12H_UP;GSE18791_CTRL_VS_NEWCASTLE_VIR…	Completeproteome;Proteomicsidentification;Referenceproteome		GO:0006605;GO:0006626;GO:0006810;GO:0006839;GO:0006886;GO:0015031;GO:0017038;GO:0045184;GO:0046907;GO:0051234;GO:0051649;GO:0072594;GO:0072655		GO:0005741;GO:0016020;GO:0019867;GO:0031090;GO:0031966;GO:0031968;GO:0044422;GO:0044424;GO:0044429;GO:0044444;GO:0044446;GO:0044464
13.5412540435791	13.6169805526733	13.8814888000488	13.7695207595825	16.182975769043	14.4748611450195	13.0128965377808	13.3013372421265	14.0511236190796	14.4224548339844	14.8463850021362	15.8786764144897	14.1596870422363	13.0605754852295	13.2963733673096	13.5399475097656	15.8719778060913	13.4283800125122	13.2039976119995	13.4492559432983	13.8301248550415	14.4609441757202	15.2529430389404	13.243275642395	13.3211889266968	15.5150842666626	14.2028551101685	13.3222856521606	15.3944959640503	14.5070266723633	13.3652057647705	13.4712142944336											DUF2181	BRUINS_UVC_RESPONSE_VIA_TP53_GROUP_D;chr5q14;GSE13306_RA_VS_UNTREATED_TCONV_UP;GSE20366_EX_VIVO_VS_DEC205_CONVERSION_UP;GSE20366_EX_VIVO_VS_HOMEOSTATIC_CONVERSION_TREG_UP;GSE27786_CD4_VS_CD8_TCELL_UP;GSE7460_CTRL_VS_FOXP3_OVEREXPR_TCONV_1_UP	Completeproteome;Proteomicsidentification;Referenceproteome
13.5712184906006	14.0089998245239	13.8633832931519	14.0125770568848	13.8992366790771	13.9039716720581	14.4165201187134	14.4377880096436	14.4457473754883	13.7652969360352	13.7598819732666	12.9928607940674	14.3345241546631	13.24977684021	14.1704454421997	12.8584966659546	13.3350400924683	14.4227485656738	13.6070346832275	15.4622354507446	14.0939235687256	14.0391635894775	13.6944255828857	15.6323652267456	13.0372247695923	13.3556442260742	13.0451745986938	13.2508716583252	13.8667593002319	14.1215944290161	13.4681406021118	12.9103851318359					biological regulation;regulation of biological process;regulation of catalytic activity;regulation of cell cycle;regulation of cellular metabolic process;regulation of cellular process;regulation of cellular protein metabolic process;regulation of cyclin-dependent protein kinase activity;regulation of kinase activity;regulation of macromolecule metabolic process;regulation of metabolic process;re…			biological regulation;regulation of cell cycle;regulation of protein modification process			Cyclin_N	CACGTG_V$MYC_Q2;CAGGTG_V$E12_Q6;CAGTATT,MIR-200B,MIR-200C,MIR-429;CAMPS_COLON_CANCER_COPY_NUMBER_UP;CHARAFE_BREAST_CANCER_LUMINAL_VS_BASAL_DN;chr2q33;CREIGHTON_ENDOCRINE_THERAPY_RESISTANCE_5;CTGCAGY_UNKNOWN;FORTSCHEGGER_PHF8_TARGETS_UP;GATTGGY_V$NFY_Q6_01;GGGTGGRR_V$PAX4_03;GSE10463_CD40L_AND_VA347_VS_CD40L_IN_DC_UP;GSE13485_CTRL_VS_DAY1_YF17D_VACCINE_PBMC_UP;GSE13485_DAY1_VS_DAY3_YF17D_VACCINE_P…	Completeproteome;Cyclin;Proteomicsidentification;Referenceproteome		GO:0000079;GO:0001932;GO:0019220;GO:0019222;GO:0031323;GO:0031399;GO:0032268;GO:0042325;GO:0043549;GO:0045859;GO:0050789;GO:0050790;GO:0050794;GO:0051174;GO:0051246;GO:0051338;GO:0051726;GO:0060255;GO:0065007;GO:0065009;GO:0071900;GO:0080090
18.8059005737305	19.4506683349609	19.2168884277344	18.4168300628662	18.766716003418	18.9853477478027	18.9117546081543	19.1527900695801	19.6075115203857	18.8830661773682	18.9794139862061	19.274055480957	19.7145805358887	19.5981788635254	19.0708026885986	19.2194900512695	19.3503952026367	19.2524814605713	18.5357151031494	19.3793487548828	18.8836631774902	19.4250106811523	19.6329498291016	19.5922603607178	18.6955413818359	18.5386734008789	19.5753879547119	18.3730525970459	19.0388813018799	18.8084182739258	19.388500213623	18.9622859954834					biological regulation;cellular process;cellular response to stimulus;establishment of localization;establishment of localization in cell;establishment of protein localization;intracellular protein transport;intracellular transport;positive regulation of biological process;positive regulation of biosynthetic process;positive regulation of cAMP biosynthetic process;positive regulation of cAMP metab…	adenylate cyclase binding;binding;enzyme binding;protein binding	cell part;cytoskeleton;intracellular non-membrane-bounded organelle;intracellular organelle;intracellular part;membrane;non-membrane-bounded organelle;organelle;plasma membrane	biological regulation;cellular process;establishment of localization;protein targeting;protein transport;response to stimulus;signal transduction;transport	cell part;cytoskeleton;intracellular non-membrane-bounded organelle;intracellular organelle;membrane;organelle;plasma membrane		WSK	ATM_DN.V1_UP;BRUINS_UVC_RESPONSE_VIA_TP53_GROUP_A;CELL_CELL_SIGNALING;CHEMNITZ_RESPONSE_TO_PROSTAGLANDIN_E2_DN;chr14q21;DOANE_RESPONSE_TO_ANDROGEN_UP;ENZYME_BINDING;FERREIRA_EWINGS_SARCOMA_UNSTABLE_VS_STABLE_UP;GGGCGGR_V$SP1_Q6;GOZGIT_ESR1_TARGETS_DN;GSE11924_TFH_VS_TH1_CD4_TCELL_UP;GSE20366_CD103_KLRG1_DP_VS_DN_TREG_UP;GSE20366_CD103_POS_VS_CD103_KLRG1_DP_TREG_UP;GSE7460_CTRL_VS_TGFB_TREATED_ACT…	Calmodulin-binding;Completeproteome;Lipoprotein;Membrane;Palmitate;Referenceproteome;Repeat		GO:0006140;GO:0006605;GO:0006810;GO:0006886;GO:0007165;GO:0009889;GO:0009891;GO:0009893;GO:0009966;GO:0009967;GO:0009987;GO:0010627;GO:0010646;GO:0010647;GO:0010738;GO:0010739;GO:0010740;GO:0015031;GO:0019219;GO:0019222;GO:0023051;GO:0023056;GO:0030799;GO:0030801;GO:0030802;GO:0030804;GO:0030808;GO:0030810;GO:0030814;GO:0030816;GO:0030817;GO:0030819;GO:0031323;GO:0031325;GO:0031326;GO:0031328;GO:…	GO:0005488;GO:0005515;GO:0008179;GO:0019899	GO:0005856;GO:0005886;GO:0016020;GO:0043226;GO:0043228;GO:0043229;GO:0043232;GO:0044424;GO:0044464
14.0087537765503	16.0715045928955	14.1650638580322	14.7591638565063	14.2717552185059	13.9925842285156	13.9425144195557	15.1277122497559	15.4596881866455	13.9444379806519	16.1453151702881	15.6883869171143	16.0384044647217	15.453784942627	15.1705513000488	15.1110944747925	12.1994009017944	14.8019609451294	13.2848243713379	16.4611110687256	14.8466653823853	15.2873516082764	16.1406707763672	14.819130897522	16.6036834716797	14.3160696029663	15.1461706161499	14.5051288604736	14.3779735565186	15.3793106079102	14.8264493942261	14.7724180221558											Ank;Ank_2	ACATTCC,MIR-1,MIR-206;ACEVEDO_LIVER_CANCER_WITH_H3K27ME3_DN;BASAKI_YBX1_TARGETS_DN;CAATGCA,MIR-33;chr18q11;CSR_LATE_UP.V1_DN;CUI_TCF21_TARGETS_2_DN;DODD_NASOPHARYNGEAL_CARCINOMA_DN;DOUGLAS_BMI1_TARGETS_UP;GAUSSMANN_MLL_AF4_FUSION_TARGETS_A_UP;GGATTA_V$PITX2_Q2;GSE11864_UNTREATED_VS_CSF1_IN_MAC_DN;GSE14308_TH2_VS_TH17_UP;GSE20366_CD103_POS_VS_CD103_KLRG1_DP_TREG_DN;GSE20366_CD103_POS_VS_NEG_TREG_K…	ANKrepeat;Completeproteome;Proteomicsidentification;Referenceproteome;Repeat
17.0007476806641	16.2496318817139	16.5018367767334	17.883752822876	16.4863014221191	15.0962209701538	16.0992660522461	16.1702976226807	17.2520179748535	17.4780120849609	16.5263156890869	16.121898651123	17.2753067016602	16.7877502441406	16.0536499023438	17.7112236022949	16.4462909698486	16.4732151031494	14.1788473129272	15.9106664657593	14.6153268814087	15.2682132720947	12.942946434021	16.9930267333984	15.9898824691772	17.6674022674561	14.361216545105	16.501293182373	16.3125114440918	16.1360702514648	16.7092723846436	15.1327409744263					biological regulation;regulation of biological process;regulation of cellular metabolic process;regulation of cellular process;regulation of macromolecule metabolic process;regulation of metabolic process;regulation of nitrogen compound metabolic process;regulation of nucleobase-containing compound metabolic process;regulation of primary metabolic process;regulation of RNA metabolic process	binding;nucleic acid binding;RNA binding		biological regulation			KH_1	BENPORATH_ES_WITH_H3K27ME3;CAGGTG_V$E12_Q6;chr19q13;CTCNANGTGNY_UNKNOWN;GGGAGGRR_V$MAZ_Q6;GGGYGTGNY_UNKNOWN;GSE14350_TREG_VS_TEFF_DN;GSE26928_EFF_MEM_VS_CENTR_MEM_CD4_TCELL_UP;GSE360_CTRL_VS_L_MAJOR_DC_UP;GSE360_HIGH_VS_LOW_DOSE_B_MALAYI_MAC_DN;GSE360_L_MAJOR_VS_M_TUBERCULOSIS_MAC_UP;GSE360_L_MAJOR_VS_T_GONDII_DC_DN;GSE37416_CTRL_VS_3H_F_TULARENSIS_LVS_NEUTROPHIL_DN;GSE3982_NEUTROPHIL_VS_TH2_UP;K…	Completeproteome;Proteomicsidentification;Referenceproteome		GO:0019219;GO:0019222;GO:0031323;GO:0050789;GO:0050794;GO:0051171;GO:0051252;GO:0060255;GO:0065007;GO:0080090	GO:0003676;GO:0003723;GO:0005488
13.8349304199219	13.2705202102661	13.4349136352539	14.8696413040161	13.751371383667	14.7203578948975	14.7414216995239	13.1153364181519	13.6475162506104	14.002269744873	13.8526124954224	14.8190269470215	14.6480836868286	14.6226682662964	14.1327857971191	13.6109991073608	14.0676336288452	14.3142137527466	13.6159601211548	13.9707546234131	13.9490785598755	14.1385746002197	12.9053058624268	13.4054689407349	15.1432056427002	14.1617040634155	13.4122714996338	13.2375087738037	13.5482225418091	13.4675874710083	14.357325553894	15.1617555618286					cellular process;cellular response to stimulus;cellular response to stress;immune system process;response to DNA damage stimulus;response to stimulus;response to stress;somatic diversification of immune receptors;somatic diversification of immune receptors via somatic mutation;somatic diversification of immunoglobulins;somatic hypermutation of immunoglobulin genes		cell part;intracellular membrane-bounded organelle;intracellular organelle;intracellular part;membrane-bounded organelle;nucleus;organelle	cellular process;immune system process;response to DNA damage stimulus;response to stimulus;response to stress	cell part;intracellular membrane-bounded organelle;intracellular organelle;nucleus;organelle				Completeproteome;Referenceproteome		GO:0002200;GO:0002376;GO:0002566;GO:0006950;GO:0006974;GO:0009987;GO:0016445;GO:0016446;GO:0033554;GO:0050896;GO:0051716		GO:0005634;GO:0043226;GO:0043227;GO:0043229;GO:0043231;GO:0044424;GO:0044464
17.0543079376221	17.4832954406738	17.3605041503906	17.0853481292725	17.854284286499	16.905481338501	17.2700214385986	17.2018947601318	17.2706604003906	17.2267513275146	17.5310764312744	17.6771411895752	16.7603302001953	16.8080081939697	17.6377849578857	17.7431373596191	17.5766620635986	17.1032886505127	17.6956768035889	18.1280250549316	17.0341320037842	17.4777736663818	17.1972942352295	16.751989364624	16.6901626586914	17.1321983337402	17.1512546539307	17.3254451751709	17.3303565979004	17.3628177642822	18.0350456237793	16.9063034057617					activation of protein kinase activity;activation of protein kinase C activity by G-protein coupled receptor protein signaling pathway;behavior;biological regulation;cell surface receptor linked signaling pathway;cellular chemical homeostasis;cellular homeostasis;cellular ion homeostasis;cellular process;cellular response to stimulus;chemical homeostasis;cognition;establishment of localization;est…	adenyl nucleotide binding;adenyl ribonucleotide binding;ATP binding;binding;catalytic activity;diacylglycerol kinase activity;enzyme binding;enzyme inhibitor activity;enzyme regulator activity;GTPase binding;GTPase inhibitor activity;GTPase regulator activity;kinase activity;NAD+ kinase activity;nucleoside-triphosphatase regulator activity;nucleotide binding;phosphotransferase activity, alcohol g…	axon part;axon terminus;cell body;cell part;cell projection;cell projection part;clathrin-coated vesicle;coated vesicle;cytoplasm;cytoplasmic membrane-bounded vesicle;cytoplasmic part;cytoplasmic vesicle;cytosol;dendritic spine;excitatory synapse;guanyl-nucleotide exchange factor complex;intracellular membrane-bounded organelle;intracellular organelle;intracellular organelle part;intracellular pa…	behavior;biological regulation;cellular homeostasis;cellular ion homeostasis;cellular process;establishment of localization;homeostatic process;multicellular organismal process;neurological system process;neurotransmitter transport;regulation of protein modification process;response to stimulus;secretion;signal transduction;transport	cell body;cell part;cell projection;cytoplasm;cytoplasmic membrane-bounded vesicle;cytosol;intracellular membrane-bounded organelle;intracellular organelle;macromolecular complex;membrane;neuron projection;neuronal cell body;nucleoplasm;organelle;protein complex;synapse;vesicle	Glycerolipid metabolism;Glycerophospholipid metabolism;Phosphatidylinositol signaling system	Ank_2;C1_1;DAGK_acc;DAGK_cat	AACTTT_UNKNOWN;ATGTACA,MIR-493;BENPORATH_EED_TARGETS;BENPORATH_ES_WITH_H3K27ME3;BENPORATH_PRC2_TARGETS;BENPORATH_SUZ12_TARGETS;CAGGTG_V$E12_Q6;chr7q32;CTACTGT,MIR-199A;CTAWWWATA_V$RSRFC4_Q2;CYTOPLASM;GAGCTGG,MIR-337;GCCNNNWTAAR_UNKNOWN;GGCAGCT,MIR-22;GSE13411_NAIVE_VS_IGM_MEMORY_BCELL_UP;GSE13411_NAIVE_VS_MEMORY_BCELL_UP;GSE13411_NAIVE_VS_SWITCHED_MEMORY_BCELL_UP;GSE20151_CTRL_VS_FUSOBACT_NUCLEAT…	ANKrepeat;ATP-binding;Completeproteome;Kinase;Nucleotide-binding;Proteomicsidentification;Referenceproteome;Repeat;Transferase		GO:0001505;GO:0001932;GO:0003008;GO:0006140;GO:0006810;GO:0006836;GO:0006873;GO:0007165;GO:0007166;GO:0007186;GO:0007205;GO:0007269;GO:0007610;GO:0007611;GO:0007612;GO:0009894;GO:0009966;GO:0009967;GO:0009987;GO:0010646;GO:0010647;GO:0019219;GO:0019220;GO:0019222;GO:0019725;GO:0023051;GO:0023056;GO:0023061;GO:0030811;GO:0031323;GO:0031329;GO:0031399;GO:0031644;GO:0032147;GO:0032268;GO:0032501;GO:…	GO:0000166;GO:0003824;GO:0003951;GO:0004143;GO:0004857;GO:0005095;GO:0005488;GO:0005515;GO:0005524;GO:0016301;GO:0016740;GO:0016772;GO:0016773;GO:0017016;GO:0017076;GO:0019899;GO:0030234;GO:0030554;GO:0030695;GO:0031267;GO:0032553;GO:0032555;GO:0032559;GO:0035639;GO:0051020;GO:0060589	GO:0005654;GO:0005737;GO:0005829;GO:0008021;GO:0016020;GO:0016023;GO:0030135;GO:0030136;GO:0031410;GO:0031982;GO:0031988;GO:0032045;GO:0032991;GO:0033267;GO:0042995;GO:0043005;GO:0043025;GO:0043197;GO:0043226;GO:0043227;GO:0043229;GO:0043231;GO:0043234;GO:0043679;GO:0044297;GO:0044306;GO:0044309;GO:0044422;GO:0044424;GO:0044428;GO:0044444;GO:0044446;GO:0044456;GO:0044463;GO:0044464;GO:0045202;GO:…
15.9029407501221	16.7594203948975	17.3714370727539	16.7764835357666	16.9362926483154	17.4246425628662	16.1389312744141	16.1057243347168	17.3293933868408	17.0206336975098	16.1069507598877	16.8647174835205	16.1274909973145	16.5160083770752	16.1511154174805	16.5059967041016	16.165771484375	16.3601264953613	16.6798915863037	16.958553314209	16.4275417327881	16.817533493042	17.4849491119385	16.8904781341553	15.884861946106	16.7210731506348	17.215892791748	16.4569969177246	16.6397647857666	17.1611328125	16.6628913879395	16.6620559692383					activation of protein kinase activity;activation of protein kinase C activity by G-protein coupled receptor protein signaling pathway;acylglycerol metabolic process;biological regulation;cell surface receptor linked signaling pathway;cellular component assembly;cellular component organization;cellular component organization or biogenesis;cellular lipid metabolic process;cellular metabolic process…	adenyl nucleotide binding;adenyl ribonucleotide binding;ATP binding;binding;catalytic activity;diacylglycerol kinase activity;identical protein binding;kinase activity;NAD+ kinase activity;nucleotide binding;phosphotransferase activity, alcohol group as acceptor;protein binding;protein dimerization activity;protein homodimerization activity;purine nucleotide binding;purine ribonucleoside triphosp…	cell part;cytoplasm;cytoplasmic part;endosome;intracellular membrane-bounded organelle;intracellular organelle;intracellular organelle part;intracellular part;membrane;membrane-bounded organelle;nuclear membrane;nuclear part;nucleus;organelle;organelle membrane;organelle part	biological regulation;cellular component assembly;cellular component organization;cellular lipid metabolic process;cellular metabolic process;cellular process;glycerol ether metabolic process;lipid metabolic process;macromolecular complex assembly;metabolic process;primary metabolic process;protein complex assembly;regulation of protein modification process;response to stimulus;signal transductio…	cell part;cytoplasm;endosome;intracellular membrane-bounded organelle;intracellular organelle;membrane;nucleus;organelle	Glycerolipid metabolism;Glycerophospholipid metabolism;Phosphatidylinositol signaling system	C1_1;DAGK_acc;DAGK_cat;PH	AACTTT_UNKNOWN;AAGCCAT,MIR-135A,MIR-135B;ACEVEDO_LIVER_CANCER_WITH_H3K9ME3_DN;ATGCACG,MIR-517B;chr13q13;CTTTGA_V$LEF1_Q2;FIRESTEIN_CTNNB1_PATHWAY;FOSTER_TOLERANT_MACROPHAGE_DN;GSE10463_CD40L_AND_VA347_VS_CD40L_IN_DC_UP;GSE13306_TREG_VS_TCONV_SPLEEN_UP;GSE14308_NAIVE_CD4_TCELL_VS_INDUCED_TREG_DN;GSE14308_TH1_VS_TH17_UP;GSE14308_TH2_VS_NAIVE_CD4_TCELL_DN;GSE14308_TH2_VS_TH1_DN;GSE14350_IL2RB_KO_VS_…	ATP-binding;Completeproteome;Kinase;Metal-binding;Nucleotide-binding;Proteomicsidentification;Referenceproteome;Transferase;Zinc;Zinc-finger		GO:0001932;GO:0006461;GO:0006629;GO:0006638;GO:0006639;GO:0006662;GO:0007165;GO:0007166;GO:0007186;GO:0007205;GO:0008152;GO:0009987;GO:0016043;GO:0018904;GO:0019220;GO:0019222;GO:0022607;GO:0031323;GO:0031399;GO:0032147;GO:0032268;GO:0033674;GO:0035556;GO:0042325;GO:0043085;GO:0043549;GO:0043933;GO:0044093;GO:0044237;GO:0044238;GO:0044255;GO:0044281;GO:0045859;GO:0045860;GO:0046339;GO:0046486;GO:…	GO:0000166;GO:0003824;GO:0003951;GO:0004143;GO:0005488;GO:0005515;GO:0005524;GO:0016301;GO:0016740;GO:0016772;GO:0016773;GO:0017076;GO:0030554;GO:0032553;GO:0032555;GO:0032559;GO:0035639;GO:0042802;GO:0042803;GO:0046983	GO:0005634;GO:0005737;GO:0005768;GO:0016020;GO:0031090;GO:0031965;GO:0043226;GO:0043227;GO:0043229;GO:0043231;GO:0044422;GO:0044424;GO:0044428;GO:0044444;GO:0044446;GO:0044464
13.8146829605103	14.4987754821777	14.3507537841797	13.7954616546631	14.0704393386841	14.6264114379883	14.050012588501	14.1623678207397	13.3796443939209	13.8417816162109	14.2890815734863	13.4212617874146	13.8945999145508	14.1234521865845	12.7743062973022	13.807412147522	12.9142141342163	14.8200569152832	14.4961404800415	14.9708633422852	12.7821130752563	14.6429567337036	13.864068031311	13.9491720199585	13.9484262466431	14.5686693191528	15.1020069122314	13.9226560592651	13.9493894577026	12.7067384719849	13.1784744262695	14.6074314117432							cell part;cytoplasm;intracellular part;membrane;plasma membrane		cell part;cytoplasm;membrane;plasma membrane		LRAT	ACEVEDO_LIVER_CANCER_UP;ACEVEDO_LIVER_TUMOR_VS_NORMAL_ADJACENT_TISSUE_UP;ATGAAGG,MIR-205;ATGTTAA,MIR-302C;BHAT_ESR1_TARGETS_NOT_VIA_AKT1_DN;BHAT_ESR1_TARGETS_VIA_AKT1_DN;BRUECKNER_TARGETS_OF_MIRLET7A3_UP;CACTGTG,MIR-128A,MIR-128B;CAGTGTT,MIR-141,MIR-200A;CCTGCTG,MIR-214;CERVERA_SDHB_TARGETS_2;chr8q24;COLDREN_GEFITINIB_RESISTANCE_DN;CREIGHTON_ENDOCRINE_THERAPY_RESISTANCE_5;CTACCTC,LET-7A,LET-7B,LE…	Completeproteome;Proteomicsidentification;Referenceproteome				GO:0005737;GO:0005886;GO:0016020;GO:0044424;GO:0044464
14.3927869796753	15.2795381546021	14.5161924362183	14.9332294464111	15.4112129211426	14.979380607605	14.890549659729	14.2918901443481	14.5299949645996	14.8007984161377	14.8356561660767	15.5604524612427	15.3350763320923	15.6610269546509	15.9495077133179	14.8664093017578	13.961784362793	15.5080118179321	14.8472528457642	15.1875457763672	15.418116569519	14.4780740737915	15.7920789718628	14.0923633575439	14.5989246368408	15.2975254058838	15.2328701019287	14.704119682312	13.5609464645386	15.6463899612427	14.8575439453125	15.4762086868286							cell part;cytoplasmic part;Golgi apparatus;intracellular membrane-bounded organelle;intracellular organelle;intracellular part;membrane-bounded organelle;organelle		cell part;Golgi apparatus;intracellular membrane-bounded organelle;intracellular organelle;organelle			AAGCCAT,MIR-135A,MIR-135B;ACCAAAG,MIR-9;ATGCTGC,MIR-103,MIR-107;ATGTTTC,MIR-494;CAGCTG_V$AP4_Q5;CASORELLI_ACUTE_PROMYELOCYTIC_LEUKEMIA_DN;CATTGTYY_V$SOX9_B1;chr5q32;DAVICIONI_MOLECULAR_ARMS_VS_ERMS_UP;DAVICIONI_PAX_FOXO1_SIGNATURE_IN_ARMS_UP;DAVICIONI_RHABDOMYOSARCOMA_PAX_FOXO1_FUSION_UP;DAVICIONI_TARGETS_OF_PAX_FOXO1_FUSIONS_UP;EBAUER_TARGETS_OF_PAX3_FOXO1_FUSION_DN;FIGUEROA_AML_METHYLATION_CLUS…	Completeproteome;Proteomicsidentification;Referenceproteome				GO:0005794;GO:0043226;GO:0043227;GO:0043229;GO:0043231;GO:0044424;GO:0044444;GO:0044464
13.8373327255249	15.7331476211548	16.095458984375	15.5900897979736	15.6072435379028	16.1738719940186	15.399377822876	15.5424575805664	15.5189294815063	16.1746730804443	15.3596467971802	15.951512336731	15.4137601852417	15.4686880111694	15.8372583389282	15.8333349227905	15.1478805541992	14.9865083694458	15.769811630249	14.6792049407959	15.8081350326538	15.9190492630005	16.4639873504639	14.6522846221924	13.1042881011963	16.140230178833	15.5502958297729	14.3660488128662	15.2582349777222	15.7200574874878	15.6163187026978	15.8542356491089					biological regulation;biosynthetic process;cellular biosynthetic process;cellular macromolecule biosynthetic process;cellular macromolecule metabolic process;cellular metabolic process;cellular nitrogen compound metabolic process;cellular process;cellular response to stimulus;estrogen receptor signaling pathway;growth;hormone metabolic process;intracellular receptor mediated signaling pathway;mac…	binding;chromatin binding;core promoter binding;DNA binding;nucleic acid binding;nucleotide binding;regulatory region DNA binding;regulatory region nucleic acid binding;transcription regulatory region DNA binding	cell part;intracellular organelle part;intracellular part;nuclear part;nucleoplasm;organelle part	biological regulation;biosynthetic process;cellular metabolic process;cellular nitrogen compound metabolic process;cellular process;growth;hormone metabolic process;macromolecule metabolic process;metabolic process;nitrogen compound metabolic process;nucleobase-containing compound metabolic process;primary metabolic process;response to stimulus;RNA metabolic process;signal transduction	cell part;nucleoplasm		SAP	BLALOCK_ALZHEIMERS_DISEASE_UP;CASORELLI_ACUTE_PROMYELOCYTIC_LEUKEMIA_DN;chr19p13;CHROMOSOME_ORGANIZATION_AND_BIOGENESIS;DNA_BINDING;DOUBLE_STRANDED_DNA_BINDING;ESTABLISHMENT_AND_OR_MAINTENANCE_OF_CHROMATIN_ARCHITECTURE;FAELT_B_CLL_WITH_VH3_21_UP;GCCATNTTG_V$YY1_Q6;GCGSCMNTTT_UNKNOWN;GCM_ING1;GCM_MLL;GCM_NF2;GCM_NUMA1;GGGCGGR_V$SP1_Q6;GSE13485_CTRL_VS_DAY3_YF17D_VACCINE_PBMC_UP;GSE1460_CD4_THYMOCY…	Acetylation;Coiledcoil;Completeproteome;DNA-binding;Isopeptidebond;Nucleus;Phosphoprotein;Referenceproteome;Repressor;RNA-binding;Transcription;Transcriptionregulation;Ublconjugation		GO:0006139;GO:0006351;GO:0006355;GO:0006357;GO:0006807;GO:0007165;GO:0008152;GO:0009058;GO:0009059;GO:0009889;GO:0009891;GO:0009893;GO:0009987;GO:0010468;GO:0010556;GO:0010557;GO:0010604;GO:0010628;GO:0010817;GO:0016070;GO:0019219;GO:0019222;GO:0030518;GO:0030520;GO:0030522;GO:0031323;GO:0031325;GO:0031326;GO:0031328;GO:0032774;GO:0034641;GO:0034645;GO:0040007;GO:0042445;GO:0043170;GO:0044237;GO:…	GO:0000166;GO:0000975;GO:0001047;GO:0001067;GO:0003676;GO:0003677;GO:0003682;GO:0005488;GO:0044212	GO:0005654;GO:0044422;GO:0044424;GO:0044428;GO:0044446;GO:0044464
14.0695371627808	14.5297966003418	14.5442743301392	13.4963626861572	14.9263887405396	15.1292028427124	14.3929882049561	14.1394367218018	13.923056602478	13.8694629669189	13.2328443527222	14.7753534317017	14.8289804458618	14.6490869522095	14.787239074707	14.6959266662598	14.5909967422485	13.3134355545044	14.8740692138672	14.2089910507202	14.8421049118042	15.1799087524414	15.9873971939087	14.2811241149902	13.280065536499	14.9972238540649	13.9751071929932	13.7953357696533	15.2800722122192	13.771125793457	14.5130100250244	15.0614318847656					anatomical structure morphogenesis;cell morphogenesis;cell morphogenesis involved in differentiation;cellular component morphogenesis;cellular component organization;cellular component organization or biogenesis;cellular developmental process;cellular process;developmental process;endothelial cell morphogenesis;epithelial cell morphogenesis	enzyme regulator activity;GTPase regulator activity;guanyl-nucleotide exchange factor activity;nucleoside-triphosphatase regulator activity;Ras guanyl-nucleotide exchange factor activity;Rho guanyl-nucleotide exchange factor activity;small GTPase regulator activity		anatomical structure morphogenesis;cell morphogenesis;cellular component morphogenesis;cellular component organization;cellular process;developmental process		Bacterial invasion of epithelial cells	PH;RhoGEF;SH3_1	BRUINS_UVC_RESPONSE_VIA_TP53_GROUP_A;CAIRO_HEPATOBLASTOMA_DN;CHARAFE_BREAST_CANCER_LUMINAL_VS_BASAL_UP;chr3q25;CUI_TCF21_TARGETS_2_DN;DAIRKEE_TERT_TARGETS_DN;DAWSON_METHYLATED_IN_LYMPHOMA_TCL1;GSE11924_TFH_VS_TH2_CD4_TCELL_DN;GSE27786_CD4_TCELL_VS_MONO_MAC_DN;GSE27786_CD8_TCELL_VS_MONO_MAC_DN;GSE27786_NKTCELL_VS_MONO_MAC_DN;GSE29618_PRE_VS_DAY7_FLU_VACCINE_BCELL_UP;GSE29618_PRE_VS_DAY7_POST_LAIV_…	Completeproteome;Proteomicsidentification;Referenceproteome;SH3domain		GO:0000902;GO:0000904;GO:0001886;GO:0003382;GO:0009653;GO:0009987;GO:0016043;GO:0032502;GO:0032989;GO:0048869;GO:0071840	GO:0005083;GO:0005085;GO:0005088;GO:0005089;GO:0030234;GO:0030695;GO:0060589
14.0695734024048	14.6249666213989	14.8877439498901	16.4909133911133	15.9374885559082	13.8624877929688	15.1776924133301	14.2201519012451	13.4497861862183	15.2050676345825	13.8228988647461	14.1397533416748	14.6921577453613	13.652379989624	14.3979415893555	14.8753652572632	16.4830760955811	14.8188314437866	15.6794528961182	14.9105548858643	13.8422956466675	14.4459447860718	14.8521642684937	14.3018589019775	14.6699924468994	15.8341751098633	14.1780071258545	14.8961906433105	15.2148885726929	14.3771963119507	12.8175706863403	13.5893907546997											DDE_Tnp_1_7	AAGCACT,MIR-520F;AGCACTT,MIR-93,MIR-302A,MIR-302B,MIR-302C,MIR-302D,MIR-372,MIR-373,MIR-520E,MIR-520A,MIR-526B,MIR-520B,MIR-520C,MIR-520D;AMIT_SERUM_RESPONSE_240_MCF10A;BHAT_ESR1_TARGETS_NOT_VIA_AKT1_UP;BRUINS_UVC_RESPONSE_VIA_TP53_GROUP_A;chr1q42;DAVICIONI_MOLECULAR_ARMS_VS_ERMS_UP;DOANE_BREAST_CANCER_ESR1_DN;EBAUER_TARGETS_OF_PAX3_FOXO1_FUSION_DN;GAGCCTG,MIR-484;GAUSSMANN_MLL_AF4_FUSION_TARGETS…	Completeproteome;Proteomicsidentification;Referenceproteome
16.9772357940674	17.2479457855225	16.5470294952393	16.6254234313965	16.4024124145508	16.8140316009521	16.5983867645264	16.5039653778076	17.1616249084473	16.7154521942139	17.431432723999	17.2356586456299	17.277759552002	17.3529396057129	17.6334629058838	16.6623344421387	16.4071025848389	17.3788204193115	17.0463352203369	17.4270992279053	17.0418510437012	17.5652503967285	17.6764526367188	16.4117259979248	16.2031192779541	16.5286827087402	17.9357166290283	15.6777200698853	16.4368572235107	16.9346809387207	17.365894317627	17.3135375976563							cell part;cytoplasm;cytoskeleton;intracellular non-membrane-bounded organelle;intracellular organelle;intracellular part;non-membrane-bounded organelle;organelle		cell part;cytoplasm;cytoskeleton;intracellular non-membrane-bounded organelle;intracellular organelle;organelle	Pathways in cancer;Thyroid cancer	DUF2046	AACYNNNNTTCCS_UNKNOWN;AAGCACA,MIR-218;AATGTGA,MIR-23A,MIR-23B;ACACTCC,MIR-122A;ACCAAAG,MIR-9;ACTGAAA,MIR-30A-3P,MIR-30E-3P;AGGTGCA,MIR-500;BAELDE_DIABETIC_NEPHROPATHY_DN;BENPORATH_MYC_MAX_TARGETS;BLALOCK_ALZHEIMERS_DISEASE_DN;BRUINS_UVC_RESPONSE_EARLY_LATE;BYSTRYKH_HEMATOPOIESIS_STEM_CELL_AND_BRAIN_QTL_TRANS;BYSTRYKH_HEMATOPOIESIS_STEM_CELL_QTL_TRANS;CACGTG_V$MYC_Q2;CACTGTG,MIR-128A,MIR-128B;CAGC…	Acetylation;Chromosomalrearrangement;Coiledcoil;Completeproteome;Cytoplasm;Cytoskeleton;Phosphoprotein;Referenceproteome;Repeat;SH3-binding				GO:0005737;GO:0005856;GO:0043226;GO:0043228;GO:0043229;GO:0043232;GO:0044424;GO:0044464
18.2090530395508	17.2742137908936	16.8726749420166	17.5000476837158	17.901891708374	17.5098209381104	17.6331806182861	17.0854511260986	17.4862060546875	17.7365474700928	16.7387256622314	16.8575687408447	17.2303199768066	17.2937412261963	17.3857440948486	16.8155326843262	18.8201541900635	17.2876224517822	17.2123832702637	17.3872604370117	16.0617294311523	17.8943328857422	17.1436023712158	17.5418529510498	17.3659801483154	18.1958045959473	17.8421173095703	17.4742126464844	17.6896152496338	16.1587867736816	17.2406978607178	16.799560546875					adult behavior;anatomical structure morphogenesis;associative learning;behavior;behavioral interaction between organisms;biological regulation;cell part morphogenesis;cellular chemical homeostasis;cellular component assembly;cellular component morphogenesis;cellular component organization;cellular component organization at cellular level;cellular component organization or biogenesis;cellular comp…	ankyrin repeat binding;binding;GKAP/Homer scaffold activity;glutamate receptor binding;G-protein-coupled receptor binding;identical protein binding;ionotropic glutamate receptor binding;neuropeptide receptor binding;protein binding;protein complex binding;protein complex scaffold;protein C-terminus binding;protein domain specific binding;receptor binding;receptor signaling complex scaffold activi…	cell junction;cell part;cell projection;cell projection part;cytoplasm;dendrite;dendritic spine;excitatory synapse;intracellular part;ionotropic glutamate receptor complex;macromolecular complex;membrane;membrane part;neuron projection;neuron spine;N-methyl-D-aspartate selective glutamate receptor complex;plasma membrane;plasma membrane part;postsynaptic membrane;protein complex;receptor complex;…	anatomical structure morphogenesis;behavior;behavioral interaction between organisms;biological regulation;cellular component assembly;cellular component morphogenesis;cellular component organization;cellular homeostasis;cellular ion homeostasis;cellular process;developmental maturation;developmental process;homeostatic process;localization;macromolecular complex assembly;multicellular organismal…	cell part;cell projection;cytoplasm;macromolecular complex;membrane;neuron projection;plasma membrane;protein complex;receptor complex;synapse		Ank_2;PDZ;SAM_1;SH3_2	BRCA1_DN.V1_UP;CAGGTG_V$E12_Q6;CELL_FRACTION;CHEN_METABOLIC_SYNDROM_NETWORK;chr19q13;DOUGLAS_BMI1_TARGETS_UP;GGGAGGRR_V$MAZ_Q6;GSE12366_GC_BCELL_VS_PLASMA_CELL_DN;GSE1460_CD4_THYMOCYTE_VS_THYMIC_STROMAL_CELL_UP;GSE1460_INTRATHYMIC_T_PROGENITOR_VS_THYMIC_STROMAL_CELL_UP;GTTRYCATRR_UNKNOWN;KRAS.AMP.LUNG_UP.V1_DN;MEMBRANE_FRACTION;MOHANKUMAR_TLX1_TARGETS_DN;PRC1_BMI_UP.V1_UP;RGAANNTTC_V$HSF1_01;RNGT…	ANKrepeat;Celljunction;Cellmembrane;Completeproteome;Cytoplasm;Differentiation;Membrane;Neurogenesis;Phosphoprotein;Postsynapticcellmembrane;Referenceproteome;Repeat;SH3domain;Synapse		GO:0003008;GO:0006461;GO:0006873;GO:0007610;GO:0007611;GO:0007612;GO:0007613;GO:0007616;GO:0007635;GO:0008104;GO:0008306;GO:0009605;GO:0009653;GO:0009966;GO:0009987;GO:0010469;GO:0010639;GO:0010975;GO:0016043;GO:0019725;GO:0021700;GO:0022607;GO:0023051;GO:0030534;GO:0031344;GO:0032231;GO:0032232;GO:0032501;GO:0032502;GO:0032956;GO:0032970;GO:0032989;GO:0032990;GO:0033036;GO:0033043;GO:0035176;GO:…	GO:0001664;GO:0005102;GO:0005198;GO:0005488;GO:0005515;GO:0008022;GO:0017124;GO:0019904;GO:0030159;GO:0030160;GO:0031877;GO:0032403;GO:0032947;GO:0035254;GO:0035255;GO:0042802;GO:0071532;GO:0071855;GO:0097110	GO:0005737;GO:0005886;GO:0008328;GO:0016020;GO:0017146;GO:0030054;GO:0030425;GO:0032991;GO:0042995;GO:0043005;GO:0043197;GO:0043234;GO:0043235;GO:0044309;GO:0044424;GO:0044425;GO:0044456;GO:0044459;GO:0044463;GO:0044464;GO:0045202;GO:0045211;GO:0060076;GO:0097060
17.0603370666504	18.0721645355225	17.892614364624	18.0575370788574	17.3365592956543	17.9511699676514	17.8477554321289	17.8308372497559	17.2950878143311	17.8580532073975	18.5222129821777	18.108606338501	18.0726871490479	18.0650272369385	17.6433620452881	18.0805683135986	17.1326999664307	18.0667095184326	17.942663192749	17.7023220062256	18.0628147125244	18.1421070098877	18.3344211578369	17.4474220275879	17.8304653167725	17.5960884094238	17.9250335693359	17.3449020385742	17.221851348877	18.0847244262695	18.2741241455078	17.8278636932373					establishment of localization;transport		cell part;cytoplasmic part;endoplasmic reticulum;endoplasmic reticulum-Golgi intermediate compartment;extracellular membrane-bounded organelle;extracellular organelle;extracellular region part;extracellular vesicular exosome;Golgi apparatus;integral to membrane;intracellular membrane-bounded organelle;intracellular organelle;intracellular part;intrinsic to membrane;membrane part;membrane-bounded …	establishment of localization;transport	cell part;endoplasmic reticulum;extracellular organelle;Golgi apparatus;intracellular membrane-bounded organelle;intracellular organelle;organelle;vesicle		EMP24_GP25L	AATGTGA,MIR-23A,MIR-23B;ACEVEDO_LIVER_CANCER_UP;ACEVEDO_LIVER_TUMOR_VS_NORMAL_ADJACENT_TISSUE_UP;ATTCTTT,MIR-186;BONOME_OVARIAN_CANCER_SURVIVAL_SUBOPTIMAL_DEBULKING;BORCZUK_MALIGNANT_MESOTHELIOMA_UP;BROCKE_APOPTOSIS_REVERSED_BY_IL6;BRUINS_UVC_RESPONSE_VIA_TP53_GROUP_A;chr5q22;CREIGHTON_ENDOCRINE_THERAPY_RESISTANCE_3;DAZARD_RESPONSE_TO_UV_SCC_UP;GCM_RAB10;GOLDRATH_ANTIGEN_RESPONSE;GSE12366_GC_BCEL…	Completeproteome;Membrane;Proteomicsidentification;Referenceproteome;Transmembrane;Transmembranehelix		GO:0006810;GO:0051234		GO:0005783;GO:0005793;GO:0005794;GO:0016021;GO:0031224;GO:0031982;GO:0031988;GO:0043226;GO:0043227;GO:0043229;GO:0043230;GO:0043231;GO:0044421;GO:0044424;GO:0044425;GO:0044444;GO:0044464;GO:0065010;GO:0070062
13.3786849975586	14.2160329818726	14.6378335952759	13.6377267837524	13.9550809860229	13.7381229400635	13.3117237091064	13.5943403244019	13.4902620315552	13.67418384552	13.1637668609619	14.3967351913452	13.5817222595215	14.4915332794189	12.9586372375488	14.012659072876	13.4051847457886	15.036810874939	13.4149856567383	14.1721487045288	13.018461227417	14.6211957931519	13.7819871902466	14.4307708740234	12.9955339431763	13.4227809906006	15.2836780548096	13.5790319442749	14.333779335022	15.2774209976196	13.5615367889404	13.9304103851318					cellular macromolecule metabolic process;cellular metabolic process;cellular nitrogen compound metabolic process;cellular process;macromolecule metabolic process;metabolic process;nitrogen compound metabolic process;nucleic acid metabolic process;nucleobase-containing compound metabolic process;primary metabolic process;RNA metabolic process;RNA processing;RNA secondary structure unwinding;RNA sp…	adenyl nucleotide binding;adenyl ribonucleotide binding;ATP binding;ATPase activity;ATPase activity, coupled;ATP-dependent helicase activity;ATP-dependent RNA helicase activity;binding;catalytic activity;helicase activity;hydrolase activity;hydrolase activity, acting on acid anhydrides;hydrolase activity, acting on acid anhydrides, in phosphorus-containing anhydrides;nucleoside-triphosphatase act…	catalytic step 2 spliceosome;cell part;cytoplasm;cytoplasmic part;extracellular membrane-bounded organelle;extracellular organelle;extracellular region part;extracellular vesicular exosome;intracellular membrane-bounded organelle;intracellular non-membrane-bounded organelle;intracellular organelle;intracellular organelle part;intracellular part;macromolecular complex;membrane;membrane-bounded org…	cellular metabolic process;cellular nitrogen compound metabolic process;cellular process;macromolecule metabolic process;metabolic process;nitrogen compound metabolic process;nucleobase-containing compound metabolic process;primary metabolic process;RNA metabolic process;RNA processing;RNA splicing	cell part;cytoplasm;extracellular organelle;intracellular membrane-bounded organelle;intracellular non-membrane-bounded organelle;intracellular organelle;macromolecular complex;membrane;mitochondrion;nucleolus;nucleoplasm;nucleus;organelle;plasma membrane;ribonucleoprotein complex;small nuclear ribonucleoprotein complex;spliceosomal complex;vesicle	Spliceosome	DEAD;Helicase_C	AACYNNNNTTCCS_UNKNOWN;AGUIRRE_PANCREATIC_CANCER_COPY_NUMBER_DN;ASTON_MAJOR_DEPRESSIVE_DISORDER_UP;ATP_DEPENDENT_HELICASE_ACTIVITY;ATP_DEPENDENT_RNA_HELICASE_ACTIVITY;ATPASE_ACTIVITY;ATPASE_ACTIVITY_COUPLED;BENPORATH_NANOG_TARGETS;BIOPOLYMER_METABOLIC_PROCESS;BLUM_RESPONSE_TO_SALIRASIB_DN;BROWNE_HCMV_INFECTION_1HR_DN;BROWNE_HCMV_INFECTION_4HR_DN;CAMP_UP.V1_UP;chr12q13;DIAZ_CHRONIC_MEYLOGENOUS_LEUK…	ATP-binding;Completeproteome;Helicase;Hydrolase;Nucleotide-binding;Proteomicsidentification;Referenceproteome		GO:0000375;GO:0006139;GO:0006396;GO:0006807;GO:0008152;GO:0008380;GO:0009987;GO:0010501;GO:0016070;GO:0034641;GO:0043170;GO:0044237;GO:0044238;GO:0044260;GO:0090304	GO:0000166;GO:0003724;GO:0003824;GO:0004004;GO:0004386;GO:0005488;GO:0005524;GO:0008026;GO:0008186;GO:0016462;GO:0016787;GO:0016817;GO:0016818;GO:0016887;GO:0017076;GO:0017111;GO:0030554;GO:0032553;GO:0032555;GO:0032559;GO:0035639;GO:0042623;GO:0070035	GO:0005634;GO:0005654;GO:0005681;GO:0005682;GO:0005730;GO:0005737;GO:0005739;GO:0005886;GO:0016020;GO:0030529;GO:0030532;GO:0031982;GO:0031988;GO:0032991;GO:0043226;GO:0043227;GO:0043228;GO:0043229;GO:0043230;GO:0043231;GO:0043232;GO:0044421;GO:0044422;GO:0044424;GO:0044428;GO:0044444;GO:0044446;GO:0044464;GO:0046540;GO:0065010;GO:0070062;GO:0071013
13.7187747955322	13.614860534668	13.1642189025879	14.058934211731	13.8813180923462	14.5544586181641	14.5879802703857	13.6091947555542	13.5017585754395	13.8324699401855	13.8561639785767	15.1056642532349	13.5517444610596	13.867223739624	13.045693397522	13.8910894393921	13.5528955459595	13.7333908081055	13.7153091430664	15.2578506469727	14.3256940841675	14.6295003890991	12.530463218689	14.0485162734985	14.2015390396118	14.2870597839355	13.5421962738037	13.9281454086304	13.6639385223389	14.2202491760254	14.1499357223511	14.3919486999512						catalytic activity;hydrolase activity					Metallophos	CHENG_IMPRINTED_BY_ESTRADIOL;chr3p22	Completeproteome;Proteomicsidentification;Referenceproteome			GO:0003824;GO:0016787
18.4218921661377	19.1792278289795	18.3393898010254	20.2932243347168	18.6490955352783	18.4958000183105	18.7173290252686	18.5245494842529	19.0565853118896	19.3561038970947	18.8517551422119	18.513334274292	19.3883743286133	19.930139541626	18.474925994873	18.2803440093994	19.8036479949951	17.7873668670654	19.4158000946045	19.6347579956055	18.69411277771	18.1179161071777	16.064847946167	19.7453231811523	18.1907501220703	19.1355590820313	18.9032459259033	18.4707622528076	19.0141620635986	17.7732677459717	19.6120014190674	18.1433029174805					anatomical structure development;brain development;developmental process;organ development		actin filament bundle;actomyosin;cell part;cytoskeletal part;extracellular membrane-bounded organelle;extracellular organelle;extracellular region part;extracellular vesicular exosome;intracellular organelle part;intracellular part;membrane-bounded organelle;membrane-bounded vesicle;organelle;organelle part;stress fiber;vesicle	anatomical structure development;developmental process	cell part;extracellular organelle;organelle;vesicle		Tropomyosin		Coiledcoil;Completeproteome;Referenceproteome		GO:0007420;GO:0032502;GO:0048513;GO:0048856		GO:0001725;GO:0031982;GO:0031988;GO:0032432;GO:0042641;GO:0043226;GO:0043227;GO:0043230;GO:0044421;GO:0044422;GO:0044424;GO:0044430;GO:0044446;GO:0044464;GO:0065010;GO:0070062
13.9127330780029	14.5759172439575	13.7150983810425	13.7695207595825	13.0605850219727	14.1802968978882	13.6133165359497	13.3242654800415	14.7721996307373	14.4343194961548	13.7508134841919	13.7955350875854	15.5494155883789	12.285080909729	13.1786470413208	14.6659317016602	13.5005407333374	14.4836568832397	13.8280878067017	14.4994382858276	13.2621955871582	14.1619672775269	14.2327175140381	13.317554473877	13.2082691192627	13.4472122192383	13.2449312210083	13.9528379440308	13.8330926895142	13.9285869598389	13.4250507354736	13.9822807312012					cellular component movement;cellular process;microtubule-based movement;microtubule-based process	catalytic activity;hydrolase activity;hydrolase activity, acting on acid anhydrides;hydrolase activity, acting on acid anhydrides, in phosphorus-containing anhydrides;microtubule motor activity;motor activity;nucleoside-triphosphatase activity;pyrophosphatase activity	cell part;cytoskeletal part;dynein complex;extracellular membrane-bounded organelle;extracellular organelle;extracellular region part;extracellular vesicular exosome;intracellular organelle part;intracellular part;macromolecular complex;membrane-bounded organelle;membrane-bounded vesicle;microtubule associated complex;organelle;organelle part;protein complex;vesicle	cellular component movement;cellular process	cell part;extracellular organelle;macromolecular complex;organelle;protein complex;vesicle		DHC_N2;Dynein_heavy;MT	CAGCTG_V$AP4_Q5;CAGGTG_V$E12_Q6;chr11p15;GCANCTGNY_V$MYOD_Q6;GINESTIER_BREAST_CANCER_20Q13_AMPLIFICATION_DN;GSE11057_NAIVE_VS_CENT_MEMORY_CD4_TCELL_UP;GSE11057_NAIVE_VS_EFF_MEMORY_CD4_TCELL_UP;GSE11057_NAIVE_VS_MEMORY_CD4_TCELL_UP;GSE2706_LPS_VS_R848_AND_LPS_2H_STIM_DC_UP;SENGUPTA_EBNA1_ANTICORRELATED;TGGAAA_V$NFAT_Q4_01;V$AML1_01;V$AML1_Q6;V$AP2REP_01;V$COREBINDINGFACTOR_Q6;V$LBP1_Q6;V$MYOGENIN_…	Completeproteome;Referenceproteome		GO:0006928;GO:0007017;GO:0007018;GO:0009987	GO:0003774;GO:0003777;GO:0003824;GO:0016462;GO:0016787;GO:0016817;GO:0016818;GO:0017111	GO:0005875;GO:0030286;GO:0031982;GO:0031988;GO:0032991;GO:0043226;GO:0043227;GO:0043230;GO:0043234;GO:0044421;GO:0044422;GO:0044424;GO:0044430;GO:0044446;GO:0044464;GO:0065010;GO:0070062
15.8047609329224	12.9006319046021	14.105263710022	15.9162530899048	15.065037727356	14.0767116546631	14.747353553772	13.8089742660522	15.092303276062	12.9142770767212	14.1867961883545	14.6799201965332	14.6649351119995	14.9416170120239	13.4792985916138	14.7620334625244	16.5067405700684	13.3010501861572	13.0801982879639	14.0847196578979	15.3627319335938	14.2174167633057	14.3667402267456	13.4372072219849	15.0640811920166	14.8235664367676	14.0370645523071	17.237247467041	13.2517757415771	13.8749113082886	14.6103134155273	15.1191844940186					cell differentiation;cellular developmental process;cellular process;developmental process;epithelial cell differentiation	binding;nucleotide binding	cell part;intracellular membrane-bounded organelle;intracellular organelle;intracellular organelle part;intracellular part;membrane-bounded organelle;nuclear part;nucleoplasm;nucleus;organelle;organelle part	cell differentiation;cellular process;developmental process	cell part;intracellular membrane-bounded organelle;intracellular organelle;nucleoplasm;nucleus;organelle			AAACCAC,MIR-140;ACEVEDO_LIVER_CANCER_UP;ACEVEDO_NORMAL_TISSUE_ADJACENT_TO_LIVER_TUMOR_UP;ACTTTAT,MIR-142-5P;AGCACTT,MIR-93,MIR-302A,MIR-302B,MIR-302C,MIR-302D,MIR-372,MIR-373,MIR-520E,MIR-520A,MIR-526B,MIR-520B,MIR-520C,MIR-520D;BIDUS_METASTASIS_UP;BIOPOLYMER_METABOLIC_PROCESS;BLALOCK_ALZHEIMERS_DISEASE_UP;BROWNE_HCMV_INFECTION_12HR_DN;CACGTG_V$MYC_Q2;CASORELLI_ACUTE_PROMYELOCYTIC_LEUKEMIA_DN;chr…	Completeproteome;Proteomicsidentification;Referenceproteome		GO:0009987;GO:0030154;GO:0030855;GO:0032502;GO:0048869	GO:0000166;GO:0005488	GO:0005634;GO:0005654;GO:0043226;GO:0043227;GO:0043229;GO:0043231;GO:0044422;GO:0044424;GO:0044428;GO:0044446;GO:0044464
17.740571975708	14.2295389175415	16.5871467590332	12.6985912322998	13.4640140533447	13.1049709320068	14.0024271011353	14.5568351745605	17.3416061401367	14.2955522537231	17.8465919494629	13.0089588165283	17.8636894226074	17.7741050720215	17.6602458953857	14.2247381210327	13.200966835022	13.6809539794922	14.6271505355835	17.9925289154053	16.1125621795654	17.0917663574219	13.8775129318237	17.6817455291748	17.460599899292	13.9499549865723	17.5944843292236	14.1596794128418	14.407753944397	14.0839204788208	17.8626003265381	14.0966625213623						aminoacyl-tRNA hydrolase activity;carboxylic ester hydrolase activity;catalytic activity;hydrolase activity;hydrolase activity, acting on ester bonds	extracellular membrane-bounded organelle;extracellular organelle;extracellular region part;extracellular vesicular exosome;membrane-bounded organelle;membrane-bounded vesicle;organelle;vesicle		extracellular organelle;organelle;vesicle		PTH2	chr2p23;FULCHER_INFLAMMATORY_RESPONSE_LECTIN_VS_LPS_UP;GRAESSMANN_APOPTOSIS_BY_DOXORUBICIN_DN;GRAESSMANN_RESPONSE_TO_MC_AND_DOXORUBICIN_DN;GSE17721_4_VS_24H_GARDIQUIMOD_BMDM_UP;GSE17721_CPG_VS_GARDIQUIMOD_1H_BMDM_UP;GSE17721_PAM3CSK4_VS_CPG_0.5H_BMDM_DN;GSE17721_POLYIC_VS_PAM3CSK4_8H_BMDM_UP;GSE19825_CD24LOW_VS_IL2RA_HIGH_DAY3_EFF_CD8_TCELL_DN;GSE20366_EX_VIVO_VS_DEC205_CONVERSION_NAIVE_CD4_TCELL…	Completeproteome;Hydrolase;Referenceproteome			GO:0003824;GO:0004045;GO:0016787;GO:0016788;GO:0052689	GO:0031982;GO:0031988;GO:0043226;GO:0043227;GO:0043230;GO:0044421;GO:0065010;GO:0070062
13.9631433486938	13.5354452133179	13.060230255127	13.6621007919312	12.6566600799561	14.3843860626221	14.3029413223267	13.5170545578003	13.9782438278198	14.1753568649292	13.9320878982544	13.7156772613525	14.9288654327393	13.8296585083008	13.2485952377319	14.917179107666	13.334568977356	15.4840450286865	14.0537147521973	14.6922302246094	13.9735279083252	14.8435888290405	14.1177453994751	15.0600204467773	14.2138957977295	13.1261329650879	14.1887254714966	13.2374296188354	13.8954906463623	13.579475402832	14.1245985031128	14.3677453994751					acyl-CoA metabolic process;acylglycerol catabolic process;acylglycerol metabolic process;carboxylic acid catabolic process;carboxylic acid metabolic process;catabolic process;cell differentiation;cellular catabolic process;cellular component assembly;cellular component organization;cellular component organization or biogenesis;cellular developmental process;cellular ketone metabolic process;cellu…	carboxylic ester hydrolase activity;catalytic activity;fatty-acyl-ethyl-ester synthase activity;hydrolase activity;hydrolase activity, acting on ester bonds;lipase activity;sterol esterase activity;triglyceride lipase activity	cell part;cytoplasmic part;cytosol;endoplasmic reticulum;endoplasmic reticulum lumen;endoplasmic reticulum part;extracellular region part;extracellular space;intracellular membrane-bounded organelle;intracellular organelle;intracellular organelle lumen;intracellular organelle part;intracellular part;lipid particle;membrane-bounded organelle;membrane-enclosed lumen;organelle;organelle lumen;organe…	catabolic process;cell differentiation;cellular component assembly;cellular component organization;cellular ketone metabolic process;cellular lipid metabolic process;cellular metabolic process;cellular process;cofactor metabolic process;developmental process;glycerol ether metabolic process;lipid metabolic process;macromolecular complex assembly;metabolic process;multicellular organismal process;…	cell part;cytosol;endoplasmic reticulum;extracellular space;intracellular membrane-bounded organelle;intracellular organelle;lipid particle;organelle	Drug metabolism - other enzymes;Tropane, piperidine and pyridine alkaloid biosynthesis	COesterase	ACEVEDO_LIVER_CANCER_UP;ACEVEDO_LIVER_TUMOR_VS_NORMAL_ADJACENT_TISSUE_UP;ACEVEDO_METHYLATED_IN_LIVER_CANCER_DN;BMI1_DN.V1_DN;BOQUEST_STEM_CELL_CULTURED_VS_FRESH_UP;BOQUEST_STEM_CELL_UP;CAMPS_COLON_CANCER_COPY_NUMBER_DN;CARBOXYLESTERASE_ACTIVITY;CAVARD_LIVER_CANCER_MALIGNANT_VS_BENIGN;chr16q22;DODD_NASOPHARYNGEAL_CARCINOMA_UP;FARMER_BREAST_CANCER_APOCRINE_VS_BASAL;FARMER_BREAST_CANCER_APOCRINE_VS_…	Completeproteome;Cytoplasm;Directproteinsequencing;Disulfidebond;Endoplasmicreticulum;Glycoprotein;Hydrolase;Lipiddegradation;Lipiddroplet;Lipidmetabolism;Phosphoprotein;Proteomicsidentification;Referenceproteome;Serineesterase;Signal		GO:0006082;GO:0006629;GO:0006631;GO:0006637;GO:0006638;GO:0006639;GO:0006662;GO:0006732;GO:0008152;GO:0009056;GO:0009062;GO:0009636;GO:0009987;GO:0016042;GO:0016043;GO:0016054;GO:0018904;GO:0019626;GO:0019752;GO:0022607;GO:0030154;GO:0030855;GO:0032501;GO:0032502;GO:0032787;GO:0034377;GO:0034379;GO:0035383;GO:0042180;GO:0042221;GO:0043436;GO:0043933;GO:0044237;GO:0044238;GO:0044242;GO:0044248;GO:…	GO:0003824;GO:0004771;GO:0004806;GO:0016298;GO:0016787;GO:0016788;GO:0030339;GO:0052689	GO:0005615;GO:0005783;GO:0005788;GO:0005811;GO:0005829;GO:0031974;GO:0043226;GO:0043227;GO:0043229;GO:0043231;GO:0043233;GO:0044421;GO:0044422;GO:0044424;GO:0044432;GO:0044444;GO:0044446;GO:0044464;GO:0070013
13.026442527771	12.7001361846924	13.0163555145264	12.890435218811	12.4793758392334	13.2928972244263	13.5638179779053	13.4484624862671	13.7434921264648	13.3564519882202	13.2687635421753	12.4713449478149	13.8891134262085	12.8720397949219	13.6782827377319	13.107611656189	12.5498332977295	13.1091060638428	12.8232879638672	14.6946077346802	12.5968189239502	14.0864028930664	14.0304088592529	12.9789152145386	13.9389114379883	14.195987701416	14.3109254837036	12.7925872802734	13.5884552001953	13.7114515304565	14.8130216598511	12.6607980728149					cation transport;cellular potassium ion transport;cellular process;establishment of localization;ion transmembrane transport;ion transport;metal ion transport;monovalent inorganic cation transport;potassium ion transmembrane transport;potassium ion transport;transmembrane transport;transport	calcium activated cation channel activity;calcium-activated potassium channel activity;cation channel activity;cation transmembrane transporter activity;channel activity;gated channel activity;ion channel activity;ion gated channel activity;ion transmembrane transporter activity;passive transmembrane transporter activity;potassium channel activity;substrate-specific channel activity;substrate-spe…	cation channel complex;cell part;ion channel complex;macromolecular complex;membrane;membrane part;plasma membrane;plasma membrane part;potassium channel complex;protein complex;voltage-gated potassium channel complex	cellular process;establishment of localization;ion transport;transmembrane transport;transport	cell part;macromolecular complex;membrane;plasma membrane;protein complex		BK_channel_a;Ion_trans_2	CAGGTA_V$AREB6_01;CHEMNITZ_RESPONSE_TO_PROSTAGLANDIN_E2_DN;CHIANG_LIVER_CANCER_SUBCLASS_CTNNB1_DN;CHIANG_LIVER_CANCER_SUBCLASS_INTERFERON_UP;chr1q31;CORRE_MULTIPLE_MYELOMA_UP;CUI_TCF21_TARGETS_2_UP;GSE13306_LAMINA_PROPRIA_VS_SPLEEN_TREG_DN;GSE13306_TREG_VS_TCONV_LAMINA_PROPRIA_DN;GSE13485_PRE_VS_POST_YF17D_VACCINATION_PBMC_UP;GSE14000_TRANSLATED_RNA_VS_MRNA_16H_LPS_DC_UP;GSE27786_LSK_VS_CD4_TCELL…	Completeproteome;Referenceproteome		GO:0006810;GO:0006811;GO:0006812;GO:0006813;GO:0009987;GO:0015672;GO:0030001;GO:0034220;GO:0051234;GO:0055085;GO:0071804;GO:0071805	GO:0005215;GO:0005216;GO:0005227;GO:0005244;GO:0005249;GO:0005261;GO:0005267;GO:0008324;GO:0015075;GO:0015267;GO:0015269;GO:0022803;GO:0022832;GO:0022836;GO:0022838;GO:0022839;GO:0022843;GO:0022857;GO:0022891;GO:0022892	GO:0005886;GO:0008076;GO:0016020;GO:0032991;GO:0034702;GO:0034703;GO:0034705;GO:0043234;GO:0044425;GO:0044459;GO:0044464
13.3168926239014	14.1878890991211	13.8227224349976	14.0941314697266	14.2878570556641	13.7056131362915	13.0684080123901	13.5577325820923	13.4962043762207	12.2593269348145	13.563530921936	14.4768533706665	12.6685590744019	13.8738403320313	14.6534261703491	14.0077123641968	14.2083539962769	13.9101829528809	14.271653175354	14.5656900405884	14.1237678527832	13.2983732223511	14.1247463226318	14.1577806472778	13.6514024734497	15.0946846008301	13.9706182479858	15.2786378860474	14.3201541900635	14.05628490448	13.4529371261597	14.5472288131714					cell chemotaxis;cell migration;cell motility;cellular component assembly;cellular component movement;cellular component organization;cellular component organization or biogenesis;cellular process;cellular response to chemical stimulus;cellular response to stimulus;chemotaxis;locomotion;macromolecular complex assembly;macromolecular complex subunit organization;podosome assembly;protein complex as…	binding;lipid binding;phospholipid binding	cell cortex;cell junction;cell part;cell projection;cytoplasmic part;cytoskeletal part;intracellular non-membrane-bounded organelle;intracellular organelle;intracellular organelle part;intracellular part;macromolecular complex;membrane part;non-membrane-bounded organelle;organelle;organelle part;phagocytic cup;plasma membrane part;podosome;protein complex	cell motility;cellular component assembly;cellular component movement;cellular component organization;cellular process;locomotion;macromolecular complex assembly;protein complex assembly;response to chemical stimulus;response to external stimulus;response to stimulus	cell cortex;cell part;cell projection;intracellular non-membrane-bounded organelle;intracellular organelle;macromolecular complex;organelle;protein complex		BAR	AMUNDSON_POOR_SURVIVAL_AFTER_GAMMA_RADIATION_2G;BILBAN_B_CLL_LPL_DN;chr4q22;CHUNG_BLISTER_CYTOTOXICITY_DN;GNF2_CASP8;GNF2_CD97;GNF2_ITGAL;GNF2_ITGB2;GNF2_JAK1;GNF2_PTPRC;GNF2_RAB7L1;GNF2_RAP1B;GNF2_SNRK;GSE13411_NAIVE_VS_IGM_MEMORY_BCELL_UP;GSE13484_12H_UNSTIM_VS_YF17D_VACCINE_STIM_PBMC_UP;GSE1432_1H_VS_24H_IFNG_MICROGLIA_DN;GSE1460_DP_THYMOCYTE_VS_NAIVE_CD4_TCELL_CORD_BLOOD_DN;GSE1460_INTRATHYMI…	Celljunction;Cellmembrane;Cellprojection;Completeproteome;Cytoplasm;Membrane;Phosphoprotein;Referenceproteome		GO:0006461;GO:0006928;GO:0006935;GO:0009605;GO:0009987;GO:0016043;GO:0016477;GO:0022607;GO:0040011;GO:0042221;GO:0042330;GO:0043933;GO:0048870;GO:0050896;GO:0051716;GO:0060326;GO:0065003;GO:0070887;GO:0071800;GO:0071822;GO:0071840	GO:0005488;GO:0005543;GO:0008289	GO:0001891;GO:0002102;GO:0005938;GO:0030054;GO:0032991;GO:0042995;GO:0043226;GO:0043228;GO:0043229;GO:0043232;GO:0043234;GO:0044422;GO:0044424;GO:0044425;GO:0044430;GO:0044444;GO:0044446;GO:0044459;GO:0044464
19.8485946655273	19.5947399139404	19.6520919799805	19.6413173675537	19.8328304290771	19.8287620544434	19.8673152923584	19.752233505249	19.6338710784912	19.6996631622314	19.7345314025879	19.4598007202148	19.5415134429932	19.6951160430908	19.5592498779297	19.5729846954346	19.5336647033691	19.9152603149414	19.7389736175537	19.5268630981445	19.6535091400146	19.7084980010986	19.937614440918	19.3277492523193	19.9965896606445	19.9142398834229	19.3118762969971	19.8888740539551	19.7464065551758	19.920446395874	19.5505218505859	19.5518550872803					amine biosynthetic process;amine catabolic process;amine metabolic process;behavior;behavioral interaction between organisms;biological regulation;biosynthetic process;carboxylic acid biosynthetic process;carboxylic acid catabolic process;carboxylic acid metabolic process;catabolic process;cell communication;cell-cell signaling;cellular amine metabolic process;cellular amino acid biosynthetic pro…	catalytic activity;glutaminase activity;hydrolase activity;hydrolase activity, acting on carbon-nitrogen (but not peptide) bonds;hydrolase activity, acting on carbon-nitrogen (but not peptide) bonds, in linear amides	cell part;cytoplasmic part;cytosol;intracellular membrane-bounded organelle;intracellular organelle;intracellular part;membrane-bounded organelle;mitochondrion;organelle	amine metabolic process;behavior;behavioral interaction between organisms;biological regulation;biosynthetic process;catabolic process;cell communication;cell-cell signaling;cellular amino acid metabolic process;cellular component assembly;cellular component organization;cellular ketone metabolic process;cellular metabolic process;cellular nitrogen compound metabolic process;cellular process;macr…	cell part;cytosol;intracellular membrane-bounded organelle;intracellular organelle;mitochondrion;organelle	Alanine, aspartate and glutamate metabolism;Arginine and proline metabolism;D-Glutamine and D-glutamate metabolism;Nitrogen metabolism;Proximal tubule bicarbonate reclamation	Ank_2;Glutaminase	AACTTT_UNKNOWN;AATGTGA,MIR-23A,MIR-23B;ACOSTA_PROLIFERATION_INDEPENDENT_MYC_TARGETS_UP;BASAKI_YBX1_TARGETS_UP;BLALOCK_ALZHEIMERS_DISEASE_DN;BONOME_OVARIAN_CANCER_SURVIVAL_SUBOPTIMAL_DEBULKING;BOQUEST_STEM_CELL_CULTURED_VS_FRESH_UP;BOYLAN_MULTIPLE_MYELOMA_C_D_UP;BRUECKNER_TARGETS_OF_MIRLET7A3_DN;CAMP_UP.V1_DN;CHANG_CORE_SERUM_RESPONSE_DN;CHARAFE_BREAST_CANCER_LUMINAL_VS_MESENCHYMAL_DN;chr2q32;CONC…	3D-structure;Acetylation;Alternativesplicing;ANKrepeat;Completeproteome;Cytoplasm;Hydrolase;Mitochondrion;Referenceproteome;Repeat;Transitpeptide		GO:0001967;GO:0002087;GO:0003008;GO:0006082;GO:0006461;GO:0006520;GO:0006536;GO:0006537;GO:0006541;GO:0006543;GO:0006807;GO:0007154;GO:0007267;GO:0007268;GO:0007610;GO:0007631;GO:0008152;GO:0008652;GO:0009056;GO:0009058;GO:0009063;GO:0009064;GO:0009065;GO:0009084;GO:0009308;GO:0009309;GO:0009310;GO:0009987;GO:0016043;GO:0016053;GO:0016054;GO:0019752;GO:0022607;GO:0023052;GO:0032501;GO:0034641;GO:…	GO:0003824;GO:0004359;GO:0016787;GO:0016810;GO:0016811	GO:0005739;GO:0005829;GO:0043226;GO:0043227;GO:0043229;GO:0043231;GO:0044424;GO:0044444;GO:0044464
13.902533531189	13.6800966262817	13.8112764358521	12.6400184631348	14.1581544876099	12.8269186019897	12.7765674591064	13.3028802871704	14.6275510787964	14.0499382019043	13.3104104995728	14.1975727081299	14.8800659179688	12.8340816497803	14.0823230743408	13.2323169708252	14.2298593521118	13.5794191360474	13.296576499939	13.9354305267334	13.72731590271	13.8361005783081	14.0978116989136	14.0238065719604	14.2745037078857	12.86985206604	13.6447649002075	13.101203918457	14.3109540939331	14.4333686828613	14.1952457427979	14.8499803543091											DUF4538		Completeproteome;Proteomicsidentification;Referenceproteome
14.8089637756348	15.8439207077026	17.0039348602295	16.4285068511963	16.4368095397949	16.9743251800537	16.3188781738281	16.0701427459717	16.6070709228516	17.1957569122314	15.6768932342529	16.148754119873	15.6001739501953	15.8483295440674	16.2751598358154	16.0598297119141	16.667610168457	16.2604427337646	16.8456134796143	13.2301111221313	16.5045700073242	16.2454967498779	16.8427925109863	15.5185298919678	15.5889196395874	16.894983291626	16.5477828979492	14.3187732696533	14.9611787796021	16.7134399414063	15.7940092086792	16.7525119781494					biological regulation;cell differentiation;cellular component organization;cellular component organization at cellular level;cellular component organization or biogenesis;cellular component organization or biogenesis at cellular level;cellular developmental process;cellular process;developmental process;endosome organization;organelle organization;osteoblast differentiation;regulation of biologic…		cell part;cytoplasmic part;early endosome membrane;endosomal part;endosome membrane;extracellular membrane-bounded organelle;extracellular organelle;extracellular region part;extracellular vesicular exosome;intracellular organelle part;intracellular part;lysosomal membrane;membrane;membrane-bounded organelle;membrane-bounded vesicle;organelle;organelle membrane;organelle part;vacuolar membrane;va…	biological regulation;cell differentiation;cellular component organization;cellular process;developmental process;endosome organization;organelle organization;regulation of transport	cell part;extracellular organelle;membrane;organelle;vesicle		DnaJ;DUF4339	AAAGACA,MIR-511;AAAGGGA,MIR-204,MIR-211;AAGCACA,MIR-218;AAGCACT,MIR-520F;ACATTCC,MIR-1,MIR-206;ACTGTGA,MIR-27A,MIR-27B;ATGTACA,MIR-493;CAGTGTT,MIR-141,MIR-200A;chr3q22;DACOSTA_UV_RESPONSE_VIA_ERCC3_COMMON_DN;DACOSTA_UV_RESPONSE_VIA_ERCC3_DN;GCAAAAA,MIR-129;GGCCAGT,MIR-193A,MIR-193B;GRAESSMANN_APOPTOSIS_BY_DOXORUBICIN_DN;GSE11924_TFH_VS_TH17_CD4_TCELL_UP;GSE13411_IGM_VS_SWITCHED_MEMORY_BCELL_DN;GS…	Completeproteome;Proteomicsidentification;Receptor;Referenceproteome		GO:0001649;GO:0006996;GO:0007032;GO:0009987;GO:0016043;GO:0030154;GO:0032386;GO:0032502;GO:0032879;GO:0048869;GO:0050789;GO:0050794;GO:0051049;GO:0060341;GO:0060627;GO:0065007;GO:0071840;GO:0071841;GO:0071842;GO:2000641		GO:0005765;GO:0005774;GO:0010008;GO:0016020;GO:0031090;GO:0031901;GO:0031982;GO:0031988;GO:0043226;GO:0043227;GO:0043230;GO:0044421;GO:0044422;GO:0044424;GO:0044437;GO:0044440;GO:0044444;GO:0044446;GO:0044464;GO:0065010;GO:0070062
20.6354675292969	19.782096862793	18.9054508209229	21.0469341278076	19.8673896789551	19.9397678375244	20.0018196105957	19.9013481140137	20.3549861907959	19.484338760376	19.7191505432129	19.1627559661865	19.4728851318359	19.6445083618164	19.7681713104248	19.3834266662598	19.9887065887451	19.6047630310059	19.018949508667	19.4044303894043	19.8097515106201	19.4236164093018	19.5173587799072	19.7622623443604	19.7459964752197	19.4839057922363	19.8620109558105	21.0657234191895	20.6246204376221	17.9927501678467	19.1789608001709	19.8049411773682					multicellular organismal process;neurological system process;neuromuscular process;neuromuscular process controlling posture;response to biotic stimulus;response to stimulus;system process		cell junction;cell part;integral to membrane;intrinsic to membrane;membrane;membrane part;plasma membrane;synapse	multicellular organismal process;neurological system process;response to biotic stimulus;response to stimulus	cell part;membrane;plasma membrane;synapse		Dispanin	AACTTT_UNKNOWN;ACCAAAG,MIR-9;BAKKER_FOXO3_TARGETS_DN;CHARAFE_BREAST_CANCER_LUMINAL_VS_BASAL_UP;CHICAS_RB1_TARGETS_SENESCENT;chr16p11;CORRE_MULTIPLE_MYELOMA_DN;CREIGHTON_ENDOCRINE_THERAPY_RESISTANCE_4;CSR_EARLY_UP.V1_DN;CSR_LATE_UP.V1_DN;GACTGTT,MIR-212,MIR-132;GAGCCTG,MIR-484;GGGACCA,MIR-133A,MIR-133B;GGGAGGRR_V$MAZ_Q6;GRADE_COLON_AND_RECTAL_CANCER_DN;GTTNYYNNGGTNA_UNKNOWN;GTTTGTT,MIR-495;KTGGYRS…	Celljunction;Cellmembrane;Completeproteome;Membrane;Referenceproteome;Synapse;Transmembrane;Transmembranehelix		GO:0003008;GO:0009607;GO:0032501;GO:0050877;GO:0050884;GO:0050896;GO:0050905		GO:0005886;GO:0016020;GO:0016021;GO:0030054;GO:0031224;GO:0044425;GO:0044464;GO:0045202
17.1165466308594	17.5700778961182	17.3191070556641	17.0980529785156	17.6868152618408	17.2654495239258	16.8839321136475	17.0286407470703	16.9066562652588	17.4447555541992	17.0821285247803	17.8484268188477	17.5790958404541	17.8928508758545	16.8245105743408	17.30224609375	17.6833915710449	16.996452331543	16.7502880096436	17.5303916931152	17.2859077453613	17.6078357696533	18.2415828704834	17.9620609283447	17.4099712371826	17.2624244689941	17.195276260376	16.7914428710938	17.1197929382324	17.5457782745361	17.0515480041504	16.9770107269287					activation of protein kinase activity;activation of protein kinase C activity by G-protein coupled receptor protein signaling pathway;acylglycerol metabolic process;biological regulation;cell surface receptor linked signaling pathway;cellular component assembly;cellular component organization;cellular component organization or biogenesis;cellular lipid metabolic process;cellular metabolic process…	adenyl nucleotide binding;adenyl ribonucleotide binding;ATP binding;binding;catalytic activity;diacylglycerol kinase activity;identical protein binding;kinase activity;NAD+ kinase activity;nucleotide binding;phosphotransferase activity, alcohol group as acceptor;protein binding;protein dimerization activity;protein heterodimerization activity;protein homodimerization activity;purine nucleotide bi…	cell part;cytoplasm;cytoplasmic membrane-bounded vesicle;cytoplasmic part;cytoplasmic vesicle;intracellular membrane-bounded organelle;intracellular organelle;intracellular part;membrane;membrane-bounded organelle;membrane-bounded vesicle;organelle;plasma membrane;vesicle	biological regulation;cellular component assembly;cellular component organization;cellular lipid metabolic process;cellular metabolic process;cellular process;glycerol ether metabolic process;lipid metabolic process;macromolecular complex assembly;metabolic process;primary metabolic process;protein complex assembly;regulation of protein modification process;response to chemical stimulus;response …	cell part;cytoplasm;cytoplasmic membrane-bounded vesicle;intracellular membrane-bounded organelle;intracellular organelle;membrane;organelle;plasma membrane;vesicle	Glycerolipid metabolism;Glycerophospholipid metabolism;Phosphatidylinositol signaling system	C1_1;DAGK_acc;DAGK_cat;PH;SAM_2	AACTTT_UNKNOWN;ATF2_S_UP.V1_DN;ATF2_UP.V1_DN;BEGUM_TARGETS_OF_PAX3_FOXO1_FUSION_DN;CAGGTG_V$E12_Q6;CAIRO_HEPATOBLASTOMA_CLASSES_UP;CELLULAR_COMPONENT_ASSEMBLY;chr2q37;CYCLIN_D1_KE_.V1_UP;CYTOPLASM;CYTOPLASMIC_MEMBRANE_BOUND_VESICLE;CYTOPLASMIC_PART;CYTOPLASMIC_VESICLE;DODD_NASOPHARYNGEAL_CARCINOMA_UP;GAVIN_FOXP3_TARGETS_CLUSTER_P3;GOZGIT_ESR1_TARGETS_DN;GRUETZMANN_PANCREATIC_CANCER_UP;GSE10239_NA…	ATP-binding;Completeproteome;Kinase;Metal-binding;Nucleotide-binding;Proteomicsidentification;Referenceproteome;Transferase;Zinc;Zinc-finger		GO:0001932;GO:0006461;GO:0006629;GO:0006638;GO:0006639;GO:0006662;GO:0007165;GO:0007166;GO:0007186;GO:0007205;GO:0008152;GO:0009987;GO:0010033;GO:0016043;GO:0018904;GO:0019220;GO:0019222;GO:0022607;GO:0031323;GO:0031399;GO:0032147;GO:0032268;GO:0033674;GO:0035556;GO:0042221;GO:0042325;GO:0043085;GO:0043549;GO:0043933;GO:0044093;GO:0044237;GO:0044238;GO:0044255;GO:0044281;GO:0045859;GO:0045860;GO:…	GO:0000166;GO:0003824;GO:0003951;GO:0004143;GO:0005488;GO:0005515;GO:0005524;GO:0016301;GO:0016740;GO:0016772;GO:0016773;GO:0017076;GO:0030554;GO:0032553;GO:0032555;GO:0032559;GO:0035639;GO:0042802;GO:0042803;GO:0046982;GO:0046983	GO:0005737;GO:0005886;GO:0016020;GO:0016023;GO:0031410;GO:0031982;GO:0031988;GO:0043226;GO:0043227;GO:0043229;GO:0043231;GO:0044424;GO:0044444;GO:0044464
13.6777610778809	14.5323724746704	12.8917121887207	14.4604606628418	13.8636245727539	12.8145551681519	13.2840175628662	14.3213262557983	13.0120573043823	12.9112272262573	14.1027240753174	14.8848495483398	13.6791677474976	12.1334276199341	13.7791767120361	14.7173137664795	13.0624761581421	13.2290802001953	13.6312370300293	14.4251194000244	13.0646629333496	14.6019334793091	14.0670967102051	13.4102811813354	13.5993576049805	13.3932580947876	14.0086536407471	14.0288562774658	14.3741655349731	14.0634307861328	14.4571199417114	13.6752519607544											Ank;Ank_2;KH_1	AAGWWRNYGGC_UNKNOWN;AATGTGA,MIR-23A,MIR-23B;ATGTAGC,MIR-221,MIR-222;ATGTTTC,MIR-494;BENPORATH_OCT4_TARGETS;BENPORATH_SOX2_TARGETS;CACGTG_V$MYC_Q2;CAGGTG_V$E12_Q6;CGTSACG_V$PAX3_B;chr5q31;E2F1_UP.V1_DN;GCTNWTTGK_UNKNOWN;GGGCGGR_V$SP1_Q6;GSE11864_CSF1_PAM3CYS_VS_CSF1_IFNG_PAM3CYS_IN_MAC_DN;GSE11864_UNTREATED_VS_CSF1_IN_MAC_UP;GSE11924_TFH_VS_TH17_CD4_TCELL_UP;GSE12845_NAIVE_VS_PRE_GC_TONSIL_BCELL_D…	ANKrepeat;Completeproteome;Proteomicsidentification;Referenceproteome;Repeat
14.5293760299683	13.7312126159668	14.4106893539429	13.9518308639526	13.8176937103271	13.3257274627686	13.1594982147217	14.6563329696655	14.3407335281372	15.9009141921997	13.465913772583	14.160475730896	13.7248401641846	14.6142911911011	13.9169244766235	14.0523386001587	14.4211559295654	13.7639265060425	13.6926689147949	14.4281415939331	14.6968593597412	14.4493417739868	13.5559072494507	14.6911554336548	14.5738830566406	13.6031551361084	13.2955617904663	13.8629865646362	14.25208568573	15.3930215835571	14.5955486297607	13.9082984924316					antibacterial humoral response;antimicrobial humoral response;biological adhesion;biological regulation;blood coagulation;blood coagulation, common pathway;cell adhesion;cell-cell adhesion;cell-matrix adhesion;cell-substrate adhesion;cellular component assembly;cellular component assembly at cellular level;cellular component organization;cellular component organization at cellular level;cellular …	structural molecule activity	blood microparticle;cell cortex;cell part;cell surface;cytoplasmic membrane-bounded vesicle;cytoplasmic part;cytoplasmic vesicle;external side of plasma membrane;extracellular membrane-bounded organelle;extracellular organelle;extracellular region part;extracellular space;extracellular vesicular exosome;fibrinogen complex;intracellular membrane-bounded organelle;intracellular organelle;intracellu…	biological adhesion;biological regulation;cell adhesion;cellular component assembly;cellular component organization;cellular macromolecular complex assembly;cellular process;coagulation;immune system process;macromolecular complex assembly;macromolecule metabolic process;metabolic process;multicellular organismal process;multi-organism process;primary metabolic process;protein complex assembly;pr…	cell cortex;cell part;cell surface;cytoplasmic membrane-bounded vesicle;extracellular organelle;extracellular space;intracellular membrane-bounded organelle;intracellular organelle;macromolecular complex;organelle;protein complex;vesicle	Complement and coagulation cascades	Fib_alpha;Fibrinogen_aC;Fibrinogen_C	ACEVEDO_LIVER_CANCER_DN;ALFANO_MYC_TARGETS;BIOCARTA_AMI_PATHWAY;BIOCARTA_EXTRINSIC_PATHWAY;BIOCARTA_FIBRINOLYSIS_PATHWAY;BIOCARTA_INTRINSIC_PATHWAY;BOYAULT_LIVER_CANCER_SUBCLASS_G123_DN;CAIRO_LIVER_DEVELOPMENT_DN;CAR_HPX;CAVARD_LIVER_CANCER_MALIGNANT_VS_BENIGN;chr4q28;DAUER_STAT3_TARGETS_UP;EXTRACELLULAR_REGION;EXTRACELLULAR_REGION_PART;EXTRACELLULAR_SPACE;GSE13484_UNSTIM_VS_3H_YF17D_VACCINE_STIM…	Adaptiveimmunity;Alternativesplicing;Bloodcoagulation;Coiledcoil;Completeproteome;Disulfidebond;Glycoprotein;Hemostasis;Hydroxylation;Immunity;Innateimmunity;Phosphoprotein;Referenceproteome;Secreted;Signal		GO:0002376;GO:0002791;GO:0002793;GO:0006461;GO:0006950;GO:0006952;GO:0006955;GO:0006959;GO:0007155;GO:0007160;GO:0007165;GO:0007596;GO:0007599;GO:0008152;GO:0009607;GO:0009617;GO:0009966;GO:0009967;GO:0009987;GO:0010035;GO:0010038;GO:0010470;GO:0010627;GO:0010646;GO:0010647;GO:0010740;GO:0010941;GO:0016043;GO:0016337;GO:0017157;GO:0019229;GO:0019538;GO:0019730;GO:0019731;GO:0022407;GO:0022409;GO:…	GO:0005198	GO:0005577;GO:0005615;GO:0005938;GO:0009897;GO:0009986;GO:0016023;GO:0030141;GO:0031091;GO:0031410;GO:0031982;GO:0031988;GO:0032991;GO:0043226;GO:0043227;GO:0043229;GO:0043230;GO:0043231;GO:0043234;GO:0044421;GO:0044424;GO:0044425;GO:0044444;GO:0044459;GO:0044464;GO:0065010;GO:0070062;GO:0072562
13.4534254074097	13.1284818649292	14.1310596466064	13.3329973220825	13.5792093276978	13.7250556945801	13.337498664856	13.934006690979	14.3895215988159	13.404242515564	13.3633985519409	13.4112958908081	14.7879724502563	14.1312074661255	14.0365705490112	14.3914709091187	13.1051692962646	14.0848731994629	14.4867544174194	14.6363658905029	13.8213357925415	14.2283906936646	13.6349182128906	14.0461130142212	14.5087394714355	14.0043039321899	13.8711547851563	14.2749757766724	13.5773735046387	13.9993658065796	12.9777173995972	13.7298583984375											DUF4596		Completeproteome;Proteomicsidentification;Referenceproteome
14.5066175460815	15.7037143707275	14.7970533370972	14.1125211715698	15.7550439834595	14.662501335144	14.9845962524414	14.7920789718628	14.644926071167	15.2342185974121	15.5463218688965	15.3182954788208	14.9721269607544	16.0775661468506	15.1563987731934	15.7110481262207	14.845832824707	15.6222238540649	14.5596160888672	15.8638477325439	15.2592649459839	15.1517305374146	15.3348321914673	15.7832536697388	15.8369626998901	15.2792482376099	14.6818895339966	15.0195474624634	14.7537631988525	15.8535289764404	15.5485506057739	15.2907390594482						binding;calcium ion binding;cation binding;ion binding;metal ion binding	cell part;integral to membrane;intrinsic to membrane;membrane part		cell part		C2;PRT_C	BONOME_OVARIAN_CANCER_SURVIVAL_OPTIMAL_DEBULKING;BOQUEST_STEM_CELL_DN;BOYAULT_LIVER_CANCER_SUBCLASS_G2;CALCIUM_ION_BINDING;CATION_BINDING;CELL_FRACTION;chr5q15;CHYLA_CBFA2T3_TARGETS_UP;DCA_UP.V1_DN;GHANDHI_BYSTANDER_IRRADIATION_UP;GSE11057_CD4_CENT_MEM_VS_PBMC_DN;GSE11057_NAIVE_CD4_VS_PBMC_CD4_TCELL_DN;GSE13229_IMM_VS_MATURE_NKCELL_UP;GSE13306_LAMINA_PROPRIA_VS_SPLEEN_TREG_DN;GSE13306_RA_VS_UNTRE…	Completeproteome;Proteomicsidentification;Referenceproteome			GO:0005488;GO:0005509;GO:0043167;GO:0043169;GO:0046872	GO:0016021;GO:0031224;GO:0044425;GO:0044464
16.3868064880371	16.7036056518555	17.0008583068848	16.5108871459961	16.889289855957	16.1723499298096	16.4709453582764	16.6476554870605	16.7416248321533	16.7295932769775	17.0087566375732	16.7877502441406	16.8273677825928	16.7323799133301	16.9134502410889	16.7794380187988	16.3731880187988	16.9663486480713	16.9143848419189	17.2999229431152	16.7293281555176	16.7266712188721	16.9100570678711	16.8371353149414	16.8564739227295	16.466251373291	17.0115985870361	16.5622730255127	16.2690162658691	17.1800060272217	16.7827682495117	16.5586891174316							cell part;cytoplasm;intracellular part;membrane		cell part;cytoplasm;membrane		DUF3554	ABRAMSON_INTERACT_WITH_AIRE;ACEVEDO_NORMAL_TISSUE_ADJACENT_TO_LIVER_TUMOR_UP;BOYLAN_MULTIPLE_MYELOMA_C_D_UP;CAIRO_HEPATOBLASTOMA_CLASSES_UP;CCACACA,MIR-147;chr12q24;DANG_REGULATED_BY_MYC_DN;FOURNIER_ACINAR_DEVELOPMENT_LATE_2;GSE10239_KLRG1INT_VS_KLRG1HIGH_EFF_CD8_TCELL_UP;GSE14308_TH1_VS_TH17_DN;GSE14308_TH2_VS_TH17_UP;GSE22886_NAIVE_BCELL_VS_BLOOD_PLASMA_CELL_DN;GSE22886_NAIVE_CD4_TCELL_VS_12H_A…	Completeproteome;Proteomicsidentification;Referenceproteome				GO:0005737;GO:0016020;GO:0044424;GO:0044464
13.810209274292	13.4634857177734	13.7341203689575	13.1454286575317	14.0375900268555	14.710262298584	13.9516677856445	13.5152273178101	13.1989459991455	13.5420246124268	13.363733291626	15.1969995498657	13.678277015686	13.3922443389893	12.9622802734375	12.0332365036011	13.5450162887573	14.1325244903564	14.3692655563354	14.0534868240356	13.3425598144531	13.8346910476685	13.7594432830811	14.6177005767822	13.9108009338379	13.4236450195313	14.2345867156982	13.8166933059692	13.8680095672607	13.6487989425659	13.7410230636597	14.5545558929443					biological regulation;cellular process;cellular response to chemical stimulus;cellular response to endogenous stimulus;cellular response to estradiol stimulus;cellular response to estrogen stimulus;cellular response to hormone stimulus;cellular response to organic substance;cellular response to steroid hormone stimulus;cellular response to stimulus;positive regulation of biological process;positi…	binding;estrogen receptor binding;hormone receptor binding;ligand-dependent nuclear receptor transcription coactivator activity;nuclear hormone receptor binding;protein binding;protein binding transcription factor activity;receptor binding;steroid hormone receptor binding;transcription coactivator activity;transcription cofactor activity;transcription factor binding transcription factor activity	cell part;cytoplasm;intracellular membrane-bounded organelle;intracellular organelle;intracellular organelle part;intracellular part;membrane;membrane-bounded organelle;nuclear part;nucleoplasm;nucleus;organelle;organelle part;plasma membrane	biological regulation;cellular process;response to chemical stimulus;response to endogenous stimulus;response to stimulus	cell part;cytoplasm;intracellular membrane-bounded organelle;intracellular organelle;membrane;nucleoplasm;nucleus;organelle;plasma membrane			chr12q24;GSE14350_TREG_VS_TEFF_IN_IL2RB_KO_UP;GSE20366_CD103_POS_VS_CD103_KLRG1_DP_TREG_UP;GSE20366_EX_VIVO_VS_HOMEOSTATIC_CONVERSION_NAIVE_CD4_TCELL_UP;GSE20366_TREG_VS_TCONV_DN;GSE24102_GRANULOCYSTIC_MDSC_VS_NEUTROPHIL_UP;GSE26495_PD1HIGH_VS_PD1LOW_CD8_TCELL_UP;GSE27786_ERYTHROBLAST_VS_NEUTROPHIL_DN;GSE27786_NKCELL_VS_NEUTROPHIL_DN;HATADA_METHYLATED_IN_LUNG_CANCER_UP;MODULE_207;MODULE_26;MODULE…	Coiledcoil;Completeproteome;Cytoplasm;Nucleus;Referenceproteome;Repeat		GO:0006355;GO:0006357;GO:0009719;GO:0009725;GO:0009889;GO:0009891;GO:0009893;GO:0009987;GO:0010033;GO:0010468;GO:0010556;GO:0010557;GO:0010604;GO:0010628;GO:0019219;GO:0019222;GO:0031323;GO:0031325;GO:0031326;GO:0031328;GO:0032355;GO:0032870;GO:0042221;GO:0043627;GO:0045893;GO:0045935;GO:0045944;GO:0048518;GO:0048522;GO:0048545;GO:0050789;GO:0050794;GO:0050896;GO:0051171;GO:0051173;GO:0051252;GO:…	GO:0000988;GO:0000989;GO:0003712;GO:0003713;GO:0005102;GO:0005488;GO:0005515;GO:0030331;GO:0030374;GO:0035257;GO:0035258;GO:0051427	GO:0005634;GO:0005654;GO:0005737;GO:0005886;GO:0016020;GO:0043226;GO:0043227;GO:0043229;GO:0043231;GO:0044422;GO:0044424;GO:0044428;GO:0044446;GO:0044464
16.2450695037842	16.8733959197998	16.3725242614746	16.4258556365967	16.2936153411865	15.6818695068359	15.9674739837646	16.362663269043	16.6881141662598	16.9308757781982	16.8261260986328	16.6048145294189	16.9929161071777	16.9422626495361	16.2210960388184	16.6531257629395	16.0035171508789	16.9424915313721	16.5608558654785	16.7919521331787	16.6199913024902	16.2997264862061	16.5989093780518	17.0650787353516	16.8000659942627	16.4759864807129	16.7347621917725	14.2709522247314	15.1077070236206	16.7844295501709	16.7618885040283	16.4127521514893							cell part;cis-Golgi network;cytoplasmic part;endoplasmic reticulum-Golgi intermediate compartment;Golgi apparatus;Golgi apparatus part;intracellular membrane-bounded organelle;intracellular organelle;intracellular organelle part;intracellular part;membrane;membrane-bounded organelle;organelle;organelle part		cell part;Golgi apparatus;intracellular membrane-bounded organelle;intracellular organelle;membrane;organelle			AMUNDSON_RESPONSE_TO_ARSENITE;BLALOCK_ALZHEIMERS_DISEASE_UP;BLUM_RESPONSE_TO_SALIRASIB_UP;BUYTAERT_PHOTODYNAMIC_THERAPY_STRESS_UP;CAFFAREL_RESPONSE_TO_THC_8HR_5_UP;chr3q13;CREIGHTON_ENDOCRINE_THERAPY_RESISTANCE_3;CTTTGA_V$LEF1_Q2;CYTOPLASM;CYTOPLASMIC_PART;ENDOMEMBRANE_SYSTEM;ER_GOLGI_INTERMEDIATE_COMPARTMENT;GGATTA_V$PITX2_Q2;GOLGI_APPARATUS;GOLGI_APPARATUS_PART;GOLGI_MEMBRANE;GOLGI_STACK;GSE110…	Completeproteome;Proteomicsidentification;Referenceproteome				GO:0005793;GO:0005794;GO:0005801;GO:0016020;GO:0043226;GO:0043227;GO:0043229;GO:0043231;GO:0044422;GO:0044424;GO:0044431;GO:0044444;GO:0044446;GO:0044464
13.655083656311	15.4539775848389	16.2185440063477	15.5640897750854	15.5371885299683	14.4757966995239	15.2673721313477	15.0877532958984	14.4018125534058	16.121898651123	15.8967580795288	14.4969158172607	13.9898376464844	13.4995965957642	15.2439918518066	15.0702466964722	15.2042655944824	15.7567129135132	15.9625568389893	13.9361619949341	16.1486549377441	14.4355401992798	15.7916212081909	14.572226524353	14.1139860153198	15.8883628845215	14.6039934158325	14.6617221832275	15.02454662323	16.2438812255859	15.5667085647583	13.5937414169312					biological regulation;cellular process;cellular response to stimulus;negative regulation of biological process;negative regulation of cell communication;negative regulation of cellular process;negative regulation of Ras protein signal transduction;negative regulation of response to stimulus;negative regulation of signal transduction;negative regulation of signaling;negative regulation of small GT…	enzyme activator activity;enzyme regulator activity;GTPase activator activity;GTPase regulator activity;nucleoside-triphosphatase regulator activity	cell part;cytoplasm;intracellular part;intrinsic to internal side of plasma membrane;intrinsic to membrane;intrinsic to plasma membrane;membrane part;plasma membrane part	biological regulation;cellular process;response to stimulus;signal transduction	cell part;cytoplasm		C2;DUF3498;PH;RasGAP	AAGCACT,MIR-520F;AAGCCAT,MIR-135A,MIR-135B;ACTGCAG,MIR-17-3P;ATGTACA,MIR-493;BCAT_BILD_ET_AL_DN;BUYTAERT_PHOTODYNAMIC_THERAPY_STRESS_UP;CAGGTG_V$E12_Q6;CATRRAGC_UNKNOWN;CCAGGTT,MIR-490;CHANDRAN_METASTASIS_UP;chr1q25;COATES_MACROPHAGE_M1_VS_M2_UP;CREIGHTON_ENDOCRINE_THERAPY_RESISTANCE_2;CTCTATG,MIR-368;CTTTGA_V$LEF1_Q2;DELYS_THYROID_CANCER_UP;DODD_NASOPHARYNGEAL_CARCINOMA_UP;DOUGLAS_BMI1_TARGETS_U…	Completeproteome;GTPaseactivation;Proteomicsidentification;Referenceproteome		GO:0007165;GO:0009966;GO:0009968;GO:0009987;GO:0010646;GO:0010648;GO:0023051;GO:0023057;GO:0046578;GO:0046580;GO:0048519;GO:0048523;GO:0048583;GO:0048585;GO:0050789;GO:0050794;GO:0050896;GO:0051056;GO:0051058;GO:0051716;GO:0065007	GO:0005096;GO:0008047;GO:0030234;GO:0030695;GO:0060589	GO:0005737;GO:0031224;GO:0031226;GO:0031235;GO:0044424;GO:0044425;GO:0044459;GO:0044464
14.4164218902588	14.879056930542	16.2760887145996	15.7613430023193	15.5271711349487	14.7396221160889	16.3111629486084	15.5668869018555	14.7115592956543	16.3907909393311	15.101975440979	15.001540184021	15.8718090057373	14.1713333129883	16.2238311767578	15.3623886108398	14.5018997192383	15.5599746704102	17.1154289245605	14.3853902816772	15.7817440032959	14.315149307251	14.7350273132324	14.3171300888062	14.7789497375488	15.90696144104	14.0860528945923	13.2352924346924	14.5268049240112	16.0820026397705	15.0428991317749	14.7239036560059						endopeptidase inhibitor activity;endopeptidase regulator activity;enzyme inhibitor activity;enzyme regulator activity;peptidase inhibitor activity;peptidase regulator activity;serine-type endopeptidase inhibitor activity	cell part;collagen;extracellular matrix;extracellular matrix part;extracellular membrane-bounded organelle;extracellular organelle;extracellular region part;extracellular space;extracellular vesicular exosome;membrane;membrane-bounded organelle;membrane-bounded vesicle;organelle;plasma membrane;proteinaceous extracellular matrix;sarcolemma;vesicle		cell part;extracellular matrix;extracellular organelle;extracellular space;membrane;organelle;plasma membrane;proteinaceous extracellular matrix;vesicle		Collagen;Kunitz_BPTI;VWA	AFFAR_YY1_TARGETS_DN;ANASTASSIOU_CANCER_MESENCHYMAL_TRANSITION_SIGNATURE;ANATOMICAL_STRUCTURE_DEVELOPMENT;BERENJENO_TRANSFORMED_BY_RHOA_DN;BLALOCK_ALZHEIMERS_DISEASE_UP;BOQUEST_STEM_CELL_UP;BROWNE_HCMV_INFECTION_24HR_DN;BRUINS_UVC_RESPONSE_LATE;CAMP_UP.V1_UP;CHARAFE_BREAST_CANCER_LUMINAL_VS_MESENCHYMAL_DN;CHEN_METABOLIC_SYNDROM_NETWORK;CHIANG_LIVER_CANCER_SUBCLASS_CTNNB1_DN;chr2q37;CLASPER_LYMPHA…	3D-structure;Completeproteome;Proteomicsidentification;Referenceproteome			GO:0004857;GO:0004866;GO:0004867;GO:0030234;GO:0030414;GO:0061134;GO:0061135	GO:0005578;GO:0005581;GO:0005615;GO:0005886;GO:0016020;GO:0031012;GO:0031982;GO:0031988;GO:0042383;GO:0043226;GO:0043227;GO:0043230;GO:0044420;GO:0044421;GO:0044464;GO:0065010;GO:0070062
15.037504196167	15.7066850662231	15.7598886489868	15.552788734436	15.9673843383789	16.4494228363037	16.139591217041	16.0412521362305	15.7247800827026	16.2330760955811	16.0186996459961	15.7170877456665	16.0584564208984	15.469482421875	16.3020496368408	16.0929641723633	15.3835697174072	16.2570190429688	16.3881359100342	15.7475900650024	16.1012992858887	16.3161582946777	16.3034420013428	15.4019794464111	15.4455966949463	16.1633548736572	16.168966293335	14.9960765838623	15.5971508026123	16.2823276519775	15.8570337295532	16.255931854248						catalytic activity	cell part;intracellular membrane-bounded organelle;intracellular organelle;intracellular part;membrane-bounded organelle;nucleus;organelle		cell part;intracellular membrane-bounded organelle;intracellular organelle;nucleus;organelle		AMP-binding;DMAP_binding	AACATTC,MIR-409-3P;AACTTT_UNKNOWN;AAGCCAT,MIR-135A,MIR-135B;AATGTGA,MIR-23A,MIR-23B;ACTGCCT,MIR-34B;AMUNDSON_POOR_SURVIVAL_AFTER_GAMMA_RADIATION_2G;AMUNDSON_POOR_SURVIVAL_AFTER_GAMMA_RADIATION_8G;ATCTTGC,MIR-31;ATGTACA,MIR-493;BILBAN_B_CLL_LPL_UP;BROWNE_HCMV_INFECTION_16HR_DN;CHARAFE_BREAST_CANCER_LUMINAL_VS_BASAL_UP;CHICAS_RB1_TARGETS_SENESCENT;chr10p15;CTIP_DN.V1_DN;CTTTGTA,MIR-524;FARMER_BREAS…	Completeproteome;Proteomicsidentification;Referenceproteome			GO:0003824	GO:0005634;GO:0043226;GO:0043227;GO:0043229;GO:0043231;GO:0044424;GO:0044464
14.3302154541016	14.2552328109741	14.0441551208496	14.4661483764648	14.2365684509277	14.5718936920166	12.9658288955688	14.637921333313	15.0070352554321	13.7904262542725	13.8095664978027	13.1555852890015	13.7825517654419	13.7190895080566	14.114086151123	14.414981842041	14.086950302124	14.4748668670654	14.1354217529297	15.1565856933594	13.2097902297974	14.1838464736938	14.5266180038452	13.4985570907593	14.5962028503418	13.2737112045288	13.5167779922485	13.7408504486084	14.6153354644775	13.892258644104	13.7944288253784	14.1793012619019					biological regulation;biosynthetic process;cellular biosynthetic process;cellular component assembly;cellular component assembly at cellular level;cellular component organization;cellular component organization at cellular level;cellular component organization or biogenesis;cellular component organization or biogenesis at cellular level;cellular macromolecular complex assembly;cellular macromolec…	binding;cation binding;histone binding;ion binding;metal ion binding;protein binding;transition metal ion binding;zinc ion binding	cell part;chromatin remodeling complex;intracellular membrane-bounded organelle;intracellular organelle;intracellular organelle part;intracellular part;macromolecular complex;membrane-bounded organelle;nuclear part;nucleoplasm;nucleus;organelle;organelle part;protein complex;RSF complex	biological regulation;biosynthetic process;cellular component assembly;cellular component organization;cellular macromolecular complex assembly;cellular metabolic process;cellular nitrogen compound metabolic process;cellular process;chromatin modification;chromatin organization;chromosome organization;macromolecular complex assembly;macromolecule metabolic process;metabolic process;nitrogen compo…	cell part;chromatin remodeling complex;intracellular membrane-bounded organelle;intracellular organelle;macromolecular complex;nucleoplasm;nucleus;organelle;protein complex		PHD;WHIM1;WHIM2;WHIM3	AACATTC,MIR-409-3P;ACTTTAT,MIR-142-5P;ATPASE_ACTIVITY;BASAKI_YBX1_TARGETS_DN;BENPORATH_SOX2_TARGETS;BIOPOLYMER_METABOLIC_PROCESS;BLALOCK_ALZHEIMERS_DISEASE_UP;BUYTAERT_PHOTODYNAMIC_THERAPY_STRESS_UP;CACCAGC,MIR-138;CAGGTG_V$E12_Q6;CELLULAR_COMPONENT_ASSEMBLY;chr11q13;CHROMATIN_ASSEMBLY;CHROMATIN_ASSEMBLY_OR_DISASSEMBLY;CHROMATIN_MODIFICATION;CHROMATIN_REMODELING;CHROMATIN_REMODELING_COMPLEX;CHROM…	Completeproteome;Metal-binding;Proteomicsidentification;Referenceproteome;Zinc;Zinc-finger		GO:0006139;GO:0006325;GO:0006333;GO:0006334;GO:0006338;GO:0006352;GO:0006355;GO:0006807;GO:0006996;GO:0008152;GO:0009058;GO:0009889;GO:0009890;GO:0009891;GO:0009892;GO:0009893;GO:0009987;GO:0010468;GO:0010556;GO:0010557;GO:0010558;GO:0010604;GO:0010605;GO:0010628;GO:0010629;GO:0016043;GO:0016070;GO:0016568;GO:0016584;GO:0019219;GO:0019222;GO:0022607;GO:0031323;GO:0031324;GO:0031325;GO:0031326;GO:…	GO:0005488;GO:0005515;GO:0008270;GO:0042393;GO:0043167;GO:0043169;GO:0046872;GO:0046914	GO:0005634;GO:0005654;GO:0016585;GO:0031213;GO:0032991;GO:0043226;GO:0043227;GO:0043229;GO:0043231;GO:0043234;GO:0044422;GO:0044424;GO:0044428;GO:0044446;GO:0044464
17.5284080505371	17.2445125579834	16.3997287750244	17.1265640258789	17.0617084503174	17.7805271148682	16.6076488494873	16.9782409667969	17.4224262237549	17.1774787902832	17.2059078216553	17.3626461029053	17.6598987579346	17.7190685272217	17.4775371551514	17.0389614105225	17.2149448394775	17.4867572784424	16.9037170410156	17.8825588226318	17.0274524688721	17.8817234039307	16.9023036956787	17.4295539855957	17.3206939697266	17.2403259277344	18.0936756134033	16.817533493042	17.3106136322021	17.1989250183105	17.2690162658691	17.8601779937744					adult behavior;adult locomotory behavior;adult walking behavior;anatomical structure morphogenesis;axonogenesis;behavior;biological regulation;cardiac conduction;cell part morphogenesis;cell projection morphogenesis;cell projection organization;cellular component morphogenesis;cellular component organization;cellular component organization at cellular level;cellular component organization or biog…	actin binding;ankyrin binding;binding;cytoskeletal protein binding;enzyme binding;lipid binding;phosphatase binding;phospholipid binding;protein binding;spectrin binding;structural constituent of cytoskeleton;structural molecule activity	axon;axon hillock;axon part;cell body;cell body fiber;cell cortex part;cell part;cell projection;cell projection part;cytoplasm;cytoplasmic part;cytoskeletal part;extracellular membrane-bounded organelle;extracellular organelle;extracellular region part;extracellular vesicular exosome;initial segment;intracellular organelle part;intracellular part;membrane;membrane-bounded organelle;membrane-boun…	anatomical structure morphogenesis;behavior;biological regulation;cellular component morphogenesis;cellular component organization;cellular localization;cellular membrane organization;cellular process;circulatory system process;developmental process;localization;membrane organization;multicellular organismal process;neurological system process;regulation of protein modification process;regulation…	cell body;cell part;cell projection;cytoplasm;extracellular organelle;membrane;neuron projection;neuronal cell body;organelle;vesicle		CH;Spectrin	AAAGACA,MIR-511;ACTIN_BINDING;ACTIN_CYTOSKELETON;AFFAR_YY1_TARGETS_DN;ARGGGTTAA_UNKNOWN;ASGHARZADEH_NEUROBLASTOMA_POOR_SURVIVAL_DN;BENPORATH_ES_WITH_H3K27ME3;CACTGTG,MIR-128A,MIR-128B;CCATCCA,MIR-432;CELL_CORTEX;CELL_CORTEX_PART;CGGTGTG,MIR-220;chr19q13;CORTICAL_ACTIN_CYTOSKELETON;CORTICAL_CYTOSKELETON;CYTOPLASM;CYTOPLASMIC_PART;CYTOSKELETAL_PART;CYTOSKELETAL_PROTEIN_BINDING;CYTOSKELETON;CYTOSKEL…	Actin-binding;Completeproteome;Proteomicsidentification;Referenceproteome;Repeat		GO:0001932;GO:0002027;GO:0002028;GO:0003008;GO:0003013;GO:0003015;GO:0006937;GO:0006942;GO:0007409;GO:0007600;GO:0007605;GO:0007610;GO:0007626;GO:0007628;GO:0008016;GO:0008104;GO:0008344;GO:0009566;GO:0009653;GO:0009987;GO:0010459;GO:0010959;GO:0016043;GO:0016044;GO:0019220;GO:0019222;GO:0019226;GO:0021952;GO:0021955;GO:0022414;GO:0023052;GO:0030030;GO:0030534;GO:0031323;GO:0031399;GO:0032268;GO:…	GO:0003779;GO:0005198;GO:0005200;GO:0005488;GO:0005515;GO:0005543;GO:0008092;GO:0008289;GO:0019899;GO:0019902;GO:0030506;GO:0030507	GO:0005737;GO:0008091;GO:0016020;GO:0016363;GO:0016604;GO:0016605;GO:0030424;GO:0031982;GO:0031988;GO:0033267;GO:0033268;GO:0033270;GO:0042995;GO:0043005;GO:0043025;GO:0043194;GO:0043203;GO:0043226;GO:0043227;GO:0043230;GO:0044297;GO:0044421;GO:0044422;GO:0044424;GO:0044428;GO:0044430;GO:0044444;GO:0044446;GO:0044448;GO:0044451;GO:0044463;GO:0044464;GO:0065010;GO:0070062;GO:0070852
15.6346120834351	14.8560848236084	14.2923212051392	15.7076826095581	15.4244947433472	14.7808980941772	15.5458993911743	15.2545862197876	15.1937952041626	14.4083299636841	15.0159378051758	14.6021184921265	14.5403099060059	14.5584802627563	16.1109523773193	14.662501335144	14.6246242523193	14.548882484436	16.2998161315918	14.7065496444702	14.5736474990845	14.1618404388428	14.6459398269653	14.5142211914063	14.824610710144	14.9410934448242	15.398509979248	14.6952285766602	15.8646459579468	16.3056335449219	14.6286735534668	15.4575090408325					cotranslational protein targeting to membrane;establishment of localization;establishment of localization in cell;establishment of protein localization;establishment of protein localization in endoplasmic reticulum;establishment of protein localization to organelle;intracellular protein transport;intracellular transport;protein targeting;protein targeting to ER;protein targeting to membrane;prote…	7S RNA binding;binding;catalytic activity;GTP binding;GTPase activity;guanyl nucleotide binding;guanyl ribonucleotide binding;hydrolase activity;hydrolase activity, acting on acid anhydrides;hydrolase activity, acting on acid anhydrides, in phosphorus-containing anhydrides;nucleic acid binding;nucleoside-triphosphatase activity;nucleotide binding;purine nucleotide binding;purine ribonucleoside tr…	cell part;cytoplasmic part;intracellular organelle part;intracellular part;macromolecular complex;nuclear body;nuclear part;nuclear speck;nucleoplasm part;organelle part;ribonucleoprotein complex;signal recognition particle;signal recognition particle, endoplasmic reticulum targeting	establishment of localization;protein targeting;protein transport;transport	cell part;macromolecular complex;ribonucleoprotein complex;signal recognition particle	Bacterial secretion system;Protein export	SRP_SPB;SRP54;SRP54_N	ACEVEDO_LIVER_CANCER_UP;ATCATGA,MIR-433;BENPORATH_MYC_MAX_TARGETS;BLALOCK_ALZHEIMERS_DISEASE_DN;CAGCTG_V$AP4_Q5;CASORELLI_ACUTE_PROMYELOCYTIC_LEUKEMIA_DN;chr14q13;DANG_BOUND_BY_MYC;DIAZ_CHRONIC_MEYLOGENOUS_LEUKEMIA_UP;GGAANCGGAANY_UNKNOWN;GGGCGGR_V$SP1_Q6;GNF2_ELAC2;GNF2_KPNB1;GNF2_XRCC5;GRADE_COLON_CANCER_UP;GRUETZMANN_PANCREATIC_CANCER_DN;GSE10325_MYELOID_VS_LUPUS_MYELOID_DN;GSE11864_CSF1_IFNG_…	3D-structure;Alternativesplicing;Completeproteome;Cytoplasm;Directproteinsequencing;GTP-binding;Nucleotide-binding;Nucleus;Proteomicsidentification;Referenceproteome;Ribonucleoprotein;RNA-binding;Signalrecognitionparticle		GO:0006605;GO:0006612;GO:0006613;GO:0006614;GO:0006810;GO:0006886;GO:0015031;GO:0045047;GO:0045184;GO:0046907;GO:0051234;GO:0051649;GO:0072594;GO:0072599	GO:0000166;GO:0003676;GO:0003723;GO:0003824;GO:0003924;GO:0005488;GO:0005525;GO:0008312;GO:0016462;GO:0016787;GO:0016817;GO:0016818;GO:0017076;GO:0017111;GO:0019001;GO:0032553;GO:0032555;GO:0032561;GO:0035639	GO:0005786;GO:0016604;GO:0016607;GO:0030529;GO:0032991;GO:0044422;GO:0044424;GO:0044428;GO:0044444;GO:0044446;GO:0044451;GO:0044464;GO:0048500
14.2108526229858	14.081841468811	12.9698305130005	13.6093616485596	15.4281940460205	13.9353666305542	13.6033945083618	12.9106531143188	14.0035161972046	14.2432832717896	14.8985910415649	14.3485584259033	14.5399913787842	14.0289573669434	14.4371776580811	14.1338081359863	14.002552986145	14.5789623260498	12.8416337966919	14.4923391342163	13.0315704345703	13.9901599884033	13.3706922531128	14.1297721862793	12.8750286102295	13.9112510681152	14.4666595458984	13.2902631759644	14.9100732803345	13.28440284729	14.7287664413452	13.3324241638184					biological adhesion;cell adhesion;cell-cell adhesion;cellular process;homophilic cell adhesion	binding;calcium ion binding;cation binding;ion binding;metal ion binding	cell part;integral to membrane;intrinsic to membrane;membrane;membrane part;plasma membrane	biological adhesion;cell adhesion;cellular process	cell part;membrane;plasma membrane		Cadherin;Cadherin_2	AAAGACA,MIR-511;AAAYRNCTG_UNKNOWN;AACWWCAANK_UNKNOWN;ABE_VEGFA_TARGETS_30MIN;ACTGTGA,MIR-27A,MIR-27B;AGGCACT,MIR-515-3P;ATAAGCT,MIR-21;ATGCAGT,MIR-217;BEGUM_TARGETS_OF_PAX3_FOXO1_FUSION_UP;BENPORATH_EED_TARGETS;BENPORATH_ES_WITH_H3K27ME3;BENPORATH_PRC2_TARGETS;BENPORATH_SUZ12_TARGETS;BLALOCK_ALZHEIMERS_DISEASE_UP;BONOME_OVARIAN_CANCER_SURVIVAL_SUBOPTIMAL_DEBULKING;BOQUEST_STEM_CELL_DN;CADWELL_ATG…	Calcium;Celladhesion;Cellmembrane;Completeproteome;Membrane;Proteomicsidentification;Referenceproteome;Repeat;Transmembrane;Transmembranehelix		GO:0007155;GO:0007156;GO:0009987;GO:0016337;GO:0022610	GO:0005488;GO:0005509;GO:0043167;GO:0043169;GO:0046872	GO:0005886;GO:0016020;GO:0016021;GO:0031224;GO:0044425;GO:0044464
14.9699544906616	14.525107383728	13.1886606216431	14.3189640045166	12.8546533584595	14.762038230896	13.2410068511963	13.8761024475098	13.4293718338013	13.4774074554443	13.422872543335	13.7950010299683	13.9710893630981	14.4090375900269	13.1627597808838	14.3790035247803	13.4046411514282	14.428674697876	13.5325384140015	14.24782371521	13.7238359451294	13.6561584472656	14.8203010559082	14.5125360488892	12.5506372451782	13.128680229187	14.5106811523438	14.0055179595947	13.4255228042603	13.9670972824097	13.7793874740601	13.8466892242432					biological adhesion;cell adhesion;cell-cell adhesion;cellular process;homophilic cell adhesion	binding;calcium ion binding;cation binding;ion binding;metal ion binding	cell part;integral to membrane;integral to plasma membrane;intrinsic to membrane;intrinsic to plasma membrane;membrane part;plasma membrane part	biological adhesion;cell adhesion;cellular process	cell part		Cadherin;Cadherin_2	AAAGACA,MIR-511;AACTTT_UNKNOWN;ACTGTAG,MIR-139;ATGTCAC,MIR-489;BENPORATH_EED_TARGETS;CAGCACT,MIR-512-3P;CAGCAGG,MIR-370;CAGGGTC,MIR-504;CAGGTA_V$AREB6_01;CCATCCA,MIR-432;chr4q28;CTGAGCC,MIR-24;CTTTAAR_UNKNOWN;DAWSON_METHYLATED_IN_LYMPHOMA_TCL1;GACTGTT,MIR-212,MIR-132;GATTGGY_V$NFY_Q6_01;GGGCGGR_V$SP1_Q6;GOZGIT_ESR1_TARGETS_DN;GSE10094_LCMV_VS_LISTERIA_IND_EFF_CD4_TCELL_DN;GSE17580_UNINFECTED_VS_S…	Calcium;Celladhesion;Cellmembrane;Completeproteome;Membrane;Proteomicsidentification;Referenceproteome;Repeat;Transmembrane;Transmembranehelix		GO:0007155;GO:0007156;GO:0009987;GO:0016337;GO:0022610	GO:0005488;GO:0005509;GO:0043167;GO:0043169;GO:0046872	GO:0005887;GO:0016021;GO:0031224;GO:0031226;GO:0044425;GO:0044459;GO:0044464
[truncated: 4,988 more rows]
[truncated: 47 more columns]

## Sheet: 2-peptides
C-NS_1	C-NS_1-1	C-NS_2	C-NS_3	C-NS_4	C-NS_4-1	C-NS_5	C-NS_5-1	C-S_19	C-S_20	C-S_21-1	C-S_22-1	C-S_23	C-S_24	C-S_24-1	C-S_25-1	FH-NS_10	FH-NS_11	FH-NS_11-1	FH-NS_12	FH-NS_13-1	FH-NS_14-1	FH-NS_7	FH-NS_9	FH-S_25	FH-S_27	FH-S_28	FH-S_29	FH-S_30	FH-S_31-1	FH-S_32-1	FH-S_34-1	Unique peptides	#NAME?	-Log Student's T-test p-value C-S_C-NS	Student's T-test Difference C-S_C-NS	-Log Student's T-test p-value FH-S_FH-NS	Student's T-test Difference FH-S_FH-NS	-Log Student's T-test p-value FH-NS_C-NS	Student's T-test Difference FH-NS_C-NS	-Log Student's T-test p-value FH-S_C-S	Student's T-test Difference FH-S_C-S	Two-way ANOVA p value Group1_stress	Two-way ANOVA p value Group2_suppl	Two-way ANOVA p value Interaction	ANOVA p value	Protein IDs	Majority protein IDs	Protein names	Gene names
22.5828838348389	22.6582469940186	22.9038944244385	22.7009811401367	22.7780628204346	22.3999423980713	22.6968269348145	22.5373954772949	22.7282295227051	22.9591464996338	22.7570495605469	22.5726051330566	22.5224094390869	22.5590591430664	22.8679904937744	22.5732765197754	22.8602046966553	22.6239948272705	22.9698810577393	22.6774082183838	22.3584499359131	22.5296249389648	22.784984588623	22.4858379364014	22.6292533874512	22.9137859344482	22.5321960449219	21.4656791687012	22.4235248565674	22.6891899108887	22.5787677764893	22.5584049224854	167	0.456321	0.179157	0.0351915	0.544275	-0.187448	0.0154155	0.00401902	0.696566	-0.218621	0.4207	0.259121	0.242111	0.349686	P16546;P08032	P16546	Spectrin alpha chain, non-erythrocytic 1	Sptan1
19.2247505187988	19.5649719238281	19.4747676849365	19.4468975067139	19.4680194854736	19.7294940948486	19.3152866363525	19.4916973114014	19.6399936676025	19.6416702270508	19.5756282806396	19.599796295166	19.5775661468506	19.6363868713379	19.5275688171387	19.5125637054443	19.3983688354492	19.6565856933594	19.5597915649414	19.6733150482178	19.7161388397217	19.7626342773438	19.9694423675537	19.7317161560059	19.3881645202637	19.7869834899902	19.5575313568115	18.5792427062988	19.3947925567627	19.7801742553711	19.5465507507324	19.7792129516602	110	0.681568	1.3468	0.124411	0.707858	-0.206918	1.82271	0.219013	0.354462	-0.112315	0.615649	0.516833	0.0510159	0.208176	Q8C8R3	Q8C8R3	Ankyrin-2	Ank2
[truncated: 4,147 more rows]
[truncated: 1 more columns]
