# Supplementary material for: Fish Hydrolysate Supplementation Prevents Stress-Induced Dysregulation of Hippocampal Proteins Relative to Mitochondrial Metabolism and the Neuronal Network in Mice
Source: Foods. 2022 May 28;11(11):1591. doi: 10.3390/foods11111591 (PMC9180483; doi:10.3390/foods11111591)
Supplement: Supplementary file 1 [file foods-11-01591-s001.zip › Table_S2_stress_proteins.xlsx]

## Sheet: proteins
C-NS_1	C-NS_1-1	C-NS_2	C-NS_3	C-NS_4	C-NS_4-1	C-NS_5	C-NS_5-1	C-S_19	C-S_20	C-S_21-1	C-S_22-1	C-S_23	C-S_24	C-S_24-1	C-S_25-1	FH-NS_10	FH-NS_11	FH-NS_11-1	FH-NS_12	FH-NS_13-1	FH-NS_14-1	FH-NS_7	FH-NS_9	FH-S_25	FH-S_27	FH-S_28	FH-S_29	FH-S_30	FH-S_31-1	FH-S_32-1	FH-S_34-1	moyenne	Unique peptides	#NAME?	-Log Student's T-test p-value C-S_C-NS	Student's T-test Difference C-S_C-NS	-Log Student's T-test p-value FH-S_FH-NS	Student's T-test Difference FH-S_FH-NS	-Log Student's T-test p-value FH-NS_C-NS	Student's T-test Difference FH-NS_C-NS	-Log Student's T-test p-value FH-S_C-S	Student's T-test Difference FH-S_C-S	Two-way ANOVA p value Group1_stress	Two-way ANOVA p value Group2_suppl	Two-way ANOVA p value Interaction	ANOVA p value	Protein IDs	Majority protein IDs	Protein names
-0.348481	-0.0211126	-0.211033	-0.207886	-0.0703856	-0.177071	-0.300684	-0.286903	-0.000404839	-0.00223283	0.279747	0.371737	0.315942	0.337035	-0.169494	0.0154512	-0.312515	-0.111625	0.0127443	0.0954869	-0.333767	-0.158684	0.37687	-0.354422	0.256068	0.0624038	0.240247	-0.00696185	0.631849	0.0904944	0.0550909	-0.0675028	56887	6	2.90462	3.15036	0.511841	1.47702	0.386433	0.435252	0.143839	0.0507266	0.0184319	0.000126676	0.428893	0.540032	0.00124561	O35857	O35857	Mitochondrial import inner membrane translocase subunit TIM44
1.04091	-0.172461	-0.472593	0.588461	0.514549	0.0919316	0.526614	-0.224811	-0.0635763	0.445508	-0.607858	-0.250998	-0.174541	-0.163773	0.62845	-0.534369	0.788315	0.0203946	0.553169	1.04879	0.0349565	-0.384061	0.202603	0.0760565	0.301209	0.192055	-0.721748	-0.736339	-0.464005	-0.756919	-0.698745	-0.627179	40859.7	6	2.67073	0.712818	-0.46677	2.56263	-1.43627	0.125229	0.0988256	1.22004	-0.870671	0.00109752	0.151173	0.074355	0.00213437	Q8VDU5	Q8VDU5	SNF-related serine/threonine-protein kinase
-0.909918	0.25339	-0.92435	-0.859107	-0.847025	-0.114812	-0.875277	0.0203871	0.312919	0.1607	-0.195012	0.0416422	0.549352	0.475362	-0.247017	-0.144686	-0.926923	-0.307927	-0.0423556	0.792507	0.501291	0.681629	-0.386475	-0.0742737	0.560455	0.339431	0.763655	0.398376	0.639996	0.404585	-0.0807753	0.040255	136909	3	2.80673	2.31193	2.05861	0.815074	0.813894	1.1577	1.56891	1.01481	0.324194	0.0015439	0.0283533	0.139698	0.00156051	Q80X85	Q80X85	28S ribosomal protein S7, mitochondrial
1.35825	3.26263	0.435366	1.26489	1.09775	1.10166	0.375964	-0.665493	-0.540484	-0.119976	-0.803953	-0.761612	-0.81156	-0.397472	-0.384474	0.0931264	1.88983	-0.228053	0.709396	-0.792259	-0.26207	-0.447673	-0.595325	-0.723734	-0.103457	-0.193058	-0.725055	-0.811234	-0.163187	-0.663066	-0.662297	-0.733373	51092.9	5	2.61597	2.68054	-1.9359	0.598945	-0.655364	1.42924	-1.3554	0.0580301	-0.0748717	0.00180488	0.0673572	0.0994861	0.00242117	Q8BL97	Q8BL97	Serine/arginine-rich splicing factor 7
0.102102	0.0607935	-0.0732661	0.15144	0.113398	0.608494	-0.0584948	-0.00432585	-0.575265	-0.185619	-0.0782496	-0.197801	-0.263053	-0.37737	-0.122936	-0.658895	-0.0662338	-0.0584812	0.149225	1.28625	0.0474483	0.220386	-0.108096	0.200387	-0.0273452	-0.0388791	0.786836	-0.135442	-0.179545	-0.0461332	-0.418333	-0.0529995	18059.1	5	2.53733	2.53386	-0.737315	0.689259	-0.293029	0.166412	0.074248	1.2913	0.518534	0.00191852	0.0587945	0.150956	0.00290179	E9PZP8	E9PZP8
-0.608779	-0.682233	-0.57049	-0.893766	-0.814682	-0.78571	-0.802646	-0.894113	-0.748399	0.448089	0.849117	0.865495	0.878697	0.475366	1.14326	1.81412	-0.775729	1.95902	-0.735213	-0.773827	0.667212	0.686332	-0.691635	-0.741955	0.830398	-0.769494	-0.765595	-0.874212	0.239029	1.16165	0.130094	0.780594	59834	3	2.57693	4.42225	2.76121	0.182448	0.364344	1.33871	1.3604	0.807361	-1.03647	0.00223668	0.729904	0.0154082	0.00264895	Q8K010	Q8K010	5-oxoprolinase
0.168812	0.240828	-0.693617	-0.442035	-0.163468	-0.202104	-0.523134	0.0478783	0.195692	0.135755	0.569974	0.255074	0.282231	0.559737	0.32225	-0.13267	-0.379286	0.0960586	-0.529128	-0.392656	-0.213123	0.154196	-0.0273658	0.064292	0.44466	-0.316076	0.0989634	0.210399	-0.1329	-0.225018	0.385829	0.139951	216895	4	1.83169	1.94258	0.776716	0.932017	0.366401	0.192543	0.143174	0.864817	-0.267141	0.00257931	0.722386	0.24489	0.0147335	Q9D892	Q9D892	Inosine triphosphate pyrophosphatase
-0.0874473	-0.302448	-0.0178008	0.0722427	-0.466659	-0.713125	0.0222903	0.0509397	-0.256553	-0.0339617	-0.176305	0.345403	0.466143	0.227869	-0.206723	-0.308587	-0.591866	-0.494115	-0.132194	-0.120486	-0.498815	-0.432887	0.187429	0.0479692	-0.184208	0.131847	0.326378	0.123371	1.91621	0.580628	0.0852838	0.440174	17937.2	2	1.99149	0.651333	0.354274	2.33089	0.934301	0.156345	-0.122925	1.09916	0.457102	0.00279557	0.402526	0.151272	0.010198	P41233	P41233	ATP-binding cassette sub-family A member 1
0.789431	0.0817333	-0.373282	0.106773	0.168982	-0.633423	-0.187292	0.154813	0.388512	-0.167398	0.122786	-0.140902	0.592806	0.212558	0.182085	-0.00532122	0.851932	-0.820216	-0.451923	-0.836744	-0.157731	-0.943187	-0.269776	-0.910594	0.569901	-0.0060981	0.389579	0.496044	0.797291	-0.250987	0.13385	0.115798	103038	6	2.91907	0.49369	0.278684	2.11234	1.98214	1.46029	-1.56279	0.338784	0.140671	0.00290672	0.0496161	0.0204181	0.00120485	Q60737	Q60737	Casein kinase II subunit alpha
1.08254	4.27028	-0.912655	-0.957461	-0.954617	-0.949735	2.13057	-0.975089	-0.963405	-0.981419	-0.955858	-0.942754	-0.927816	-0.949205	-0.946345	-0.974142	-0.958564	2.21341	2.4406	3.27074	2.61893	-0.912389	1.3759	-0.945145	-0.915999	-0.976266	-0.95354	2.49269	-0.964695	-0.951046	-0.96841	-0.959094	403185	2	1.86295	1.27182	-2.45784	1.56868	-3.3422	0.519531	1.6805	0.435975	0.796139	0.00301942	0.176492	0.624362	0.0137103	P55821	P55821	Stathmin-2
-0.647821	-0.650627	0.286094	1.98288	0.44612	-0.325531	0.0726126	1.82958	-0.661442	2.40644	-0.776379	-0.751575	-0.612241	-0.600347	0.697993	-0.834618	0.679678	1.39148	1.06572	-0.460184	0.627964	-0.669013	-0.34802	-0.208464	-0.761391	1.22592	-0.689632	-0.659707	-0.741921	-0.790886	-0.756503	-0.766166	52248.1	3	1.53486	0.907562	-1.12114	1.99029	-1.60238	0.0127787	-0.0207298	0.332497	-0.501962	0.00413396	0.553747	0.585445	0.029184	Q8BTG7	Q8BTG7	Protein NDRG4
-0.949998	1.05845	-0.915096	4.3268	-0.910418	-0.936883	3.50945	1.80629	-0.945976	-0.91109	-0.884209	-0.938715	-0.9376	-0.852857	-0.959149	-0.935141	11.7869	1.06498	-0.916571	-0.873305	-0.836013	-0.892218	-0.931465	-0.791333	-0.926594	-0.882384	-0.927208	-0.899962	-0.922857	-0.869644	-0.880203	-0.925933	176079	3	1.46601	1.59521	-2.7422	1.02142	-1.7023	0.197668	-0.695143	NaN	0	0.0048148	0.811003	0.479646	0.0341973	Q5SUF2	Q5SUF2	Luc7-like protein 3
-0.223982	-0.529582	0.0259612	0.114946	-0.288144	-0.105808	0.131887	-0.648443	-0.414141	0.422428	0.299904	0.730239	1.10063	0.632587	0.396712	-0.240829	-0.307285	-0.440958	-0.646021	-0.197732	0.671706	-0.434309	-0.723578	-0.26463	1.0739	-0.12042	0.534252	-0.475214	0.263768	-0.316166	-0.433891	0.412212	17699.8	2	1.54787	1.54453	0.751233	1.06132	0.698123	0.373762	-0.290357	0.484379	-0.343467	0.00607751	0.204879	0.914166	0.0283221	Q8K2Z8	Q8K2Z8	Ubiquitin-conjugating enzyme E2 Q2
0.158174	-0.140089	0.529472	-0.146026	0.0790166	0.165656	0.089838	0.236589	-0.0216616	0.345369	-0.424358	-0.162538	-0.385125	-0.291787	-0.252641	-0.104901	0.170233	0.0295432	0.135725	-0.0964284	0.256441	0.124965	-0.0441721	-0.0589528	-0.146768	0.302946	-0.0726815	0.00703207	0.0304092	0.0638657	-0.304774	-0.0723725	161703	9	1.69338	1.7074	-0.447049	0.628748	-0.137346	0.220535	-0.0610299	0.797809	0.248672	0.00746242	0.36229	0.137589	0.0202592	P12849	P12849	cAMP-dependent protein kinase type I-beta regulatory subunit
0.310009	-0.0204528	0.350566	-0.396526	0.129064	0.149344	0.505256	0.0626428	-0.545279	-0.0611573	0.0334488	-0.184586	-0.32218	-0.260961	-0.314558	-0.431872	0.0155205	1.22786	-0.261499	-0.289018	0.0127786	0.356053	0.432467	0.0951678	-0.392333	0.585098	0.144836	-0.618655	-0.178649	-0.0836899	0.0191453	-0.0678385	102076	8	1.38576	2.14847	-0.61889	0.692601	-0.386199	0.0446359	0.0296907	0.489956	0.262381	0.00763564	0.410544	0.511124	0.0411378	Q80VP0	Q80VP0	Tectonin beta-propeller repeat-containing protein 1
-0.730542	0.142958	-0.453832	-0.420889	-0.411477	-0.425323	-0.378551	-0.729686	0.316659	-0.0482825	0.515827	-0.173745	0.361112	0.552104	-0.377636	0.11568	-0.517117	0.904987	0.0349587	-0.30321	0.236251	0.146573	0.0133817	0.288243	-0.350551	0.901151	0.311247	0.439944	0.197608	0.144164	0.128048	-0.430057	23206.5	4	2.72091	2.65674	1.08755	0.121077	0.092813	2.05987	0.974141	0.0275737	-0.0205916	0.00801511	0.0287034	0.0229761	0.00190147	Q9ER88	Q9ER88	28S ribosomal protein S29, mitochondrial
-0.198175	0.105157	-0.376305	-0.594415	-0.0329649	-0.303516	-0.447995	-0.268513	0.0877209	-0.350646	0.288547	0.0449043	0.450975	0.384747	-0.0970468	-0.0283693	-0.659443	0.158134	-0.134552	0.195283	0.217596	-0.15633	-0.257535	0.535431	0.166178	-0.29795	0.427129	0.161531	0.295644	0.200082	0.230873	0.253824	391682	10	1.57494	1.89164	0.597661	0.688078	0.346116	0.66593	0.371301	0.302084	0.119756	0.00866281	0.153036	0.458095	0.0266111	Q8CIN4	Q8CIN4	Serine/threonine-protein kinase PAK 2;PAK-2p27;PAK-2p34
-0.30262	0.529945	-0.158854	-0.388181	-0.05311	0.033495	-0.18	-0.482178	-0.0678579	-0.2474	0.125074	-0.292614	0.257535	0.166376	0.265202	1.39846	-0.54318	-0.415132	-0.181197	-0.248924	-0.773044	0.121805	-0.440257	-0.19518	-0.165181	-0.142977	0.326415	0.184917	0.354292	-0.630341	0.311697	1.83302	19831	2	1.40142	NaN	0	NaN	0	NaN	0	NaN	0	0.0100639	0.308641	0.374242	0.0396807	Q9DCS2	Q9DCS2	UPF0585 protein C16orf13 homolog
-0.612814	-0.378101	-0.120624	1.39545	-0.149247	0.119119	0.5693	0.997354	-0.690608	-0.547397	-0.155744	-0.0882434	0.471204	-0.701393	-0.561964	-0.223395	0.721568	0.0306809	0.755483	0.905273	0.553562	-0.39645	-0.187945	-0.235326	-0.129382	-0.423798	-0.0526296	-0.320811	-0.564198	0.337723	-0.186013	-0.130633	45557.3	6	1.29408	1.12648	-0.819262	1.22603	-0.587199	0.151539	0.148849	0.55522	0.380911	0.0105064	0.310426	0.654378	0.0508063	Q80U57	Q80U57	Regulating synaptic membrane exocytosis protein 3
0.380068	-0.294419	0.197142	1.36847	0.472881	-0.387108	0.349472	-0.236731	-0.300541	0.216602	-0.461028	-0.392745	-0.431097	-0.498384	0.0465992	-0.46909	0.695046	-0.37309	0.246201	0.29965	-0.394448	0.0118473	0.0496741	0.635212	-0.232132	0.528838	0.162349	-0.186217	-0.282507	-0.273532	-0.379933	-0.0670456	72198.6	11	1.3733	1.63655	-0.732649	0.614471	-0.304317	0.0760028	-0.0630163	0.88566	0.365315	0.0109615	0.433671	0.26992	0.0423354	Q9D2V7	Q9D2V7	Coronin-7
0.444808	0.64168	0.928263	0.832864	0.555329	0.265296	0.395946	-0.846816	-0.910196	0.783226	0.439378	0.372678	0.0838698	-0.814319	0.414946	-0.921508	-0.649444	1.17852	0.912491	-0.724435	0.339067	0.359362	1.31102	-0.753931	-0.759083	-0.890559	-0.605218	-0.852704	-0.709252	0.775986	-0.884439	-0.71283	77359.8	3	1.40343	0.726262	-1.12029	1.67388	-1.74411	0.249178	-0.385241	0.615938	-1.00906	0.0110031	0.195689	0.55789	0.0394977	Q3UUJ4	Q3UUJ4	STE20-related kinase adapter protein alpha
-0.920397	-0.88456	5.09093	-0.83124	-0.667939	-0.878238	-0.770215	-0.783158	-0.840819	-0.670789	-0.894899	-0.783359	-0.8425	-0.859504	-0.759052	-0.882821	4.6773	-0.749565	4.69597	-0.554594	-0.716017	-0.762889	7.84667	-0.737543	-0.79274	-0.927341	-0.816386	-0.839559	-0.886808	-0.635278	-0.858039	-0.764614	87275.7	3	1.86774	0.366465	-0.584243	1.8847	-2.4767	0.962886	1.85688	NaN	0	0.0113661	0.118123	0.105021	0.01356	Q80UM3;Q9DBB4	Q80UM3	N-alpha-acetyltransferase 15, NatA auxiliary subunit
-0.427361	0.483353	-0.124438	-0.430229	-0.858068	-0.749471	-0.811376	-0.209371	-0.154861	0.480712	0.509514	0.152682	-0.190936	0.562561	-0.168194	-0.0994991	-0.881335	0.806427	-0.808099	-0.71612	0.444349	-0.840406	0.542879	1.50094	0.177814	-0.0784732	0.792744	-0.202398	0.735618	0.272851	0.885514	-0.597317	83324.8	4	1.09704	1.82134	1.23021	0.75886	0.996178	0.140023	0.276076	0.0495194	0.04204	0.0117277	0.702945	0.778921	0.0799769	P54731	P54731	FAS-associated factor 1
-0.207319	0.091062	-0.0697283	-0.521261	-0.164175	-0.0773663	0.107754	-0.0226234	-0.309499	-0.0404471	0.585786	0.135338	0.106433	-0.0694921	0.45522	0.371006	-0.00291307	0.0366002	-0.307848	-0.068266	-0.0258768	-0.373485	0.0212764	-0.316761	-0.0256411	0.242611	0.581872	0.0174571	-0.077603	-0.270786	0.215497	-0.0168226	212078	2	1.07943	1.09098	0.366205	1.12905	0.308026	0.0465274	-0.0225091	0.176548	-0.0806882	0.0122926	0.685164	0.819026	0.0832859	Q8CI43	Q8CI43	Myosin light chain 6B
0.0790094	0.29312	-0.168315	-0.167028	-0.488357	-0.550106	-0.823074	-0.234598	0.307889	-0.208085	0.333667	0.147275	-0.0177302	0.0347044	0.167538	-0.338141	-0.700302	-0.364715	-0.218605	-0.183593	-0.0642009	-0.390535	-0.00845669	-0.0468179	-0.302292	0.299228	0.178221	2.96907	0.298574	0.29455	0.515074	-0.64297	48956	4	1.09696	1.14661	0.671045	1.05099	0.734956	0.144574	0.139951	0.228875	0.203863	0.0128595	0.521093	0.904714	0.0799903	Q9JMD0	Q9JMD0	BUB3-interacting and GLEBS motif-containing protein ZNF207
-0.160458	-0.199052	0.51322	-0.247956	0.311247	0.634766	0.455057	0.228926	-0.633704	0.448492	0.060917	-0.211846	-0.495972	-0.633325	-0.0413537	-0.0387018	-0.229228	0.395505	0.442473	0.272185	0.64975	-0.325943	-0.191013	0.0377268	-0.539616	0.613975	-0.408095	-0.177756	-0.30532	-0.0733812	-0.301238	0.149719	23760.6	6	1.09031	1.30407	-0.659837	0.858391	-0.412574	0.139916	-0.0838304	0.201934	0.163433	0.0129716	0.845264	0.545557	0.0812257	Q61584	Q61584	Fragile X mental retardation syndrome-related protein 1
0.810787	-0.518062	-0.220647	1.18752	0.441984	0.0536631	0.315546	-0.0466569	-0.28951	0.109976	-0.635315	-0.72823	-0.685317	-0.555471	0.0554965	-0.162562	-0.0800489	-0.14879	0.0722237	-0.304476	0.561558	-0.0855499	1.67465	-0.225423	-0.745396	0.345779	-0.555994	0.334411	0.707799	-0.730161	-0.326144	0.372367	49083.1	4	1.16511	1.77952	-1.02456	0.592365	-0.53996	0.100539	-0.0893235	0.365553	0.395278	0.0131973	0.608848	0.419297	0.0683731	Q99NF2	Q99NF2	NMDA receptor synaptonuclear signaling and neuronal migration factor
-0.357375	-0.00298936	0.0378099	-0.25577	-0.183494	-0.0744389	-0.141814	-0.153353	0.280952	-0.081186	0.333154	0.0211078	0.278543	0.354799	-0.00504088	-0.0470236	-0.339365	-0.182186	-0.248349	0.143574	0.0128458	0.133853	0.299143	0.0274004	-2.84243e-05	-0.141015	0.226852	0.064606	-0.226261	-0.0231064	0.182721	0.0654325	726241	10	1.5098	2.48729	0.409452	0.21029	0.0732529	0.609693	0.17368	0.745396	-0.162519	0.0138422	0.952015	0.0780562	0.0309171	Q9WTX5	Q9WTX5	S-phase kinase-associated protein 1
-0.307144	-0.266355	-0.475475	2.75464	-0.39225	0.266998	1.33417	-0.416882	-0.419768	-0.052247	0.0473103	-0.230884	-0.614971	0.657732	-0.519526	-0.300939	0.915161	-0.4141	1.43782	-0.0903258	0.14072	0.276135	0.0465144	-0.298157	-0.51521	-0.378151	-0.236641	-0.649659	-0.277917	-0.404833	-0.625679	0.00990638	24166.6	4	1.14686	0.465949	-0.43322	2.13833	-0.95828	0.148015	0.167809	0.595619	-0.357251	0.0148513	0.726408	0.335677	0.0713079	Q6PA06	Q6PA06	Atlastin-2
-0.100526	0.57014	-0.565146	-0.81725	0.538225	0.296571	-0.549017	0.111283	0.553522	-0.815942	0.223643	0.589657	0.166606	0.955488	-0.11618	0.31369	-0.079413	0.0173996	-0.651618	-0.714967	-0.868725	-0.824547	-0.236479	0.299894	0.445514	0.0882705	0.188537	0.0660484	-0.137043	0.26657	0.339353	0.446438	75827.7	3	1.31492	0.389891	0.46438	2.05148	1.36937	0.61055	-0.71519	0.198374	0.189805	0.0148611	0.463243	0.210675	0.0484267	Q91Y86	Q91Y86	Mitogen-activated protein kinase 8
-0.0618234	0.169639	-0.044556	0.441625	-0.366248	0.390572	-0.128946	-0.314546	-0.941269	-0.157143	-0.454431	0.282576	-0.951181	0.569034	-0.252363	0.341863	0.0237152	0.422063	-0.105741	0.265259	0.57682	0.205272	0.289513	1.57972	-0.901089	0.374851	-0.905573	-0.210642	-0.893527	0.402549	0.0788115	0.275191	200378	5	1.03976	0.746219	-1.02787	1.41048	-1.536	1.24307	0.463856	0.0158841	-0.0442765	0.0152105	0.675401	0.61233	0.0912521	O08992	O08992	Syntenin-1
-0.0576922	0.208409	-0.12135	-0.426441	-0.27627	-0.233083	-0.15759	-0.103783	0.1263	-0.199711	0.587346	0.0716093	0.197015	0.333816	-0.00601587	-0.116572	-0.32089	-0.00285434	-0.582552	0.1854	-0.0146891	0.0161109	0.241708	-0.163766	0.0829304	-0.156046	0.274935	0.0424997	-0.291141	0.118876	0.453929	0.289563	1.36038e+06	7	0.98862	1.60114	0.395016	0.713411	0.296807	0.120759	0.0668399	0.0698431	-0.031369	0.0154832	0.89578	0.717121	0.102655	Q62420	Q62420	Endophilin-A1
-0.199646	-0.242562	0.260299	-0.111567	0.251671	0.289959	0.338671	-0.0243857	-0.527112	0.406528	-0.0451927	-0.092648	-0.229126	-0.174391	0.0407747	0.068547	-0.0110396	0.112227	0.682316	0.29706	0.0222151	0.132584	0.0538064	-0.152146	-0.292534	0.134607	0.131235	-0.318598	-0.175335	-0.18239	-0.378591	-0.0652346	222527	10	1.03375	0.557547	-0.226406	1.76664	-0.419611	0.267895	0.0993209	0.192054	-0.093884	0.0164973	0.983024	0.451907	0.0925231	A2ALS5	A2ALS5	Rap1 GTPase-activating protein 1
1.8207	-0.802162	-0.851772	-0.608306	-0.615313	-0.629608	-0.297313	-0.785979	1.8371	-0.244868	1.82281	-0.321454	-0.567963	-0.681523	-0.311464	-0.752377	-0.561236	-0.660743	-0.528136	-0.535509	-0.791852	-0.770339	-0.501191	-0.637888	1.97834	-0.329193	3.42828	-0.431249	-0.557684	-0.809703	4.23242	-0.534828	42691.5	3	1.01729	0.696735	0.889423	1.40442	1.47968	0.124313	-0.162667	0.226992	0.427588	0.0165603	0.777693	0.530498	0.0960961	P57716	P57716	Nicastrin
-0.269884	0.0666559	-0.142142	-0.437394	-0.19881	-0.181924	-0.0726948	0.0321232	-0.058166	0.0506822	0.101342	0.0251251	0.247234	0.17231	-0.124722	0.0382847	-0.418858	0.0309817	0.0561596	0.254764	-0.0313155	-0.120843	-0.0914066	0.277583	0.174059	0.0930503	0.153067	-0.0290332	-0.232811	0.379435	0.106514	0.150632	1.31467e+06	16	1.33906	1.83417	0.33181	0.513374	0.162796	0.684539	0.216886	0.18456	0.0478725	0.0167004	0.183858	0.391772	0.0458078	Q9D394	Q9D394	Protein RUFY3
-0.222357	0.0991887	-0.267027	-0.750063	-0.46696	-0.184041	-0.38284	-0.329572	0.421119	-0.469428	0.0742227	-0.0281832	0.415443	0.886833	-0.385521	0.128497	-0.403267	-0.0206367	-0.543506	0.619576	0.0079325	-0.0578175	-0.193319	0.427503	0.106112	-0.296988	0.763559	0.101388	0.567089	-0.253991	0.41899	0.218064	7.04938e+06	8	1.4237	1.41236	0.711615	0.628451	0.336417	0.917813	0.508445	0.196147	0.133248	0.0171006	0.131809	0.371804	0.0376966	O55042	O55042	Alpha-synuclein
-0.0262666	-0.193049	0.074155	0.469893	0.245331	-0.0633662	0.020092	-0.0126147	-0.605647	0.114432	-0.0607982	-0.354135	-0.237516	0.158289	0.2331	0.0700332	0.382785	0.0986182	0.455769	0.444888	-0.112225	-0.0104533	-0.207713	0.358591	-0.566263	-0.464125	-0.148042	0.351969	0.114634	-0.466072	-0.0990475	0.0347563	147977	5	1.0272	0.653348	-0.278767	1.38799	-0.543305	0.390779	0.131473	0.18727	-0.133065	0.0174324	0.996129	0.422976	0.0939294	P35290	P35290	Ras-related protein Rab-24
-0.290454	0.0468745	-0.34114	-0.308802	-0.462608	-0.0862878	-0.650716	-0.127177	-0.2451	0.0243223	0.195108	0.0227316	0.184279	0.741515	-0.443461	0.166081	-0.608218	-0.152631	-0.575786	0.732695	-0.0855343	0.139845	-0.38002	0.793625	-0.121567	-0.30734	0.673162	0.178669	0.223326	0.158796	0.382556	0.523254	35828.6	4	1.15798	1.46649	0.580351	0.729286	0.457851	0.418158	0.310214	0.373458	0.187715	0.0177346	0.236999	0.76844	0.0695051	Q0P5W1	Q0P5W1	Vacuolar protein sorting-associated protein 8 homolog
0.315126	-0.123219	0.352448	0.971914	0.7388	-0.161879	0.946842	0.18851	-0.480967	0.802926	-0.649958	-0.425145	-0.780493	-0.683263	0.556823	-0.0276061	0.503607	0.00138973	0.795984	-0.465256	-0.167508	-0.710223	0.11112	0.00318856	-0.165455	0.714693	-0.412425	-0.231865	-0.37239	0.110635	-0.543687	-0.712665	43351.8	3	1.24954	1.72735	-1.12891	0.380042	-0.339968	0.978774	-0.592127	0.163069	0.196812	0.0185942	0.506749	0.190309	0.0562937	Q6P1I6	Q6P1I6	PH and SEC7 domain-containing protein 2
-0.334895	-0.261992	1.09588	0.966658	0.327986	0.613968	0.452704	0.27295	-0.416352	0.580571	-0.650722	-0.22572	-0.665449	-0.250949	-0.0423833	0.415985	0.318625	-0.306782	0.720745	0.328756	-0.0708982	-0.188711	-0.494456	-0.416922	-0.331514	1.19518	-0.758546	-0.6346	0.315159	-0.430916	-0.497452	-0.625906	34614.1	4	1.23422	1.39519	-0.82046	0.709423	-0.583995	0.931184	-0.513755	0.247927	-0.27729	0.0186288	0.17041	0.677248	0.0583147	Q8BTV2	Q8BTV2	Cleavage and polyadenylation specificity factor subunit 7
-0.180525	-0.361523	1.27892	-0.141036	0.248216	0.247108	0.912394	0.0453178	-0.670845	2.51619	-0.685394	-0.419813	-0.708466	0.281859	-0.605668	0.480346	0.0608558	-0.50786	1.71097	-0.244927	0.215311	-0.201343	0.151612	-0.323471	-0.379341	-0.182166	-0.206764	-0.532687	-0.604956	-0.3186	-0.55315	-0.320566	24495	2	0.979595	0.793687	-0.763977	1.5187	-0.71447	0.318653	-0.247444	0.160578	-0.197937	0.0192164	0.460406	0.934284	0.104811	Q60715	Q60715	Prolyl 4-hydroxylase subunit alpha-1
0.036078	0.00144765	-0.545995	8.18021	-0.473056	0.293026	-0.228389	-0.274254	-0.613893	-0.214292	0.011058	-0.638008	-0.65553	0.528897	-0.437219	-0.44701	-0.336965	0.316637	-0.180186	0.100983	-0.525311	-0.158143	-0.180432	-0.0102184	-0.473329	-0.543623	-0.355527	-0.464086	-0.0283248	-0.567442	-0.419008	-0.698092	22701	3	1.02317	0.791338	-0.812817	1.90786	-0.672897	0.287805	-0.336436	0.258922	-0.196516	0.0192272	0.380421	0.816709	0.0948056	E9PYG6	E9PYG6
-0.161965	0.150196	-0.312316	-0.480154	-0.182107	-0.299034	-0.302999	-0.112998	0.102061	-0.273698	0.0800558	0.219861	0.357366	0.383852	-0.122475	0.209671	-0.212637	0.000439611	-0.239917	0.130332	0.0325954	0.0329927	0.037353	0.439202	0.236673	-0.177349	0.292659	0.0795404	-0.280161	0.00682318	0.408078	-0.0419453	252209	3	1.82135	2.14205	0.513215	0.111477	0.0456307	1.59938	0.392677	0.186056	-0.0749073	0.0195459	0.169968	0.0475237	0.0150888	Q63850	Q63850	Nuclear pore glycoprotein p62
-0.626333	0.0332838	-0.269583	-0.487215	-0.498482	-0.569422	-0.651976	-0.289528	-0.00768582	-0.064075	0.104118	0.72127	1.31914	0.0238507	-0.302474	-0.287092	-0.656015	0.0382958	-0.672399	0.504031	0.236878	-0.00570154	0.972133	0.485478	-0.251831	0.418472	0.090474	-0.0401455	-0.316257	0.914142	0.235207	-0.100554	28728.8	4	1.70396	2.49937	1.00954	0.174934	0.168635	1.20151	0.794939	0.0611631	-0.0459625	0.0202899	0.128962	0.0899574	0.0197716	Q5DTM8	Q5DTM8	E3 ubiquitin-protein ligase BRE1A
-0.322471	0.289666	-0.0238436	1.7211	0.833791	0.257631	0.50476	0.279299	-0.252576	-0.842837	-0.115219	-0.823329	-0.79378	-0.220221	-0.565428	-0.827892	1.17979	0.400426	0.584646	-0.595719	-0.872071	-0.77857	1.11219	0.205812	-0.887824	0.367963	-0.678641	0.882286	-0.166611	0.947878	-0.6875	-0.112708	74855.8	4	1.46194	3.22564	-1.93873	0.109643	-0.219469	0.667324	-0.773802	0.783967	0.945459	0.0203851	0.846363	0.0601756	0.0345192	Q99J39	Q99J39	Malonyl-CoA decarboxylase, mitochondrial
-0.273851	-0.325025	-0.516496	0.324772	-0.576324	0.0262737	-0.159221	-0.235412	0.935988	-0.0661885	0.153523	-0.162984	0.62169	-0.26517	0.0317399	-0.0218179	-0.40711	-0.287059	-0.582898	0.4113	-0.477987	0.182936	0.584711	0.030374	0.0130681	0.306251	0.799235	-0.350028	0.0775635	0.230435	-0.0651954	0.0429052	17196.2	2	0.941554	1.39907	0.572536	0.656646	0.374397	0.254546	0.189439	0.0134143	-0.00869977	0.0206856	0.643353	0.611881	0.114405	Q9JK45	Q9JK45	Potassium voltage-gated channel subfamily KQT member 5
-0.214425	-0.305251	0.0508281	0.467332	-0.153732	0.589853	0.357749	0.149794	-0.277007	-0.211407	0.089314	0.0017236	0.101981	-0.0880248	-0.255499	0.00150776	-0.138315	0.181757	0.145912	0.0489959	0.128717	0.434452	0.431326	-0.34999	-0.1899	-0.421896	-0.33673	-0.185858	-0.0501304	0.0791268	0.132168	-0.214371	1.8552e+06	2	0.93773	0.700232	-0.240347	1.27096	-0.374934	0.0127918	0.00762033	0.400565	-0.126966	0.0211884	0.639434	0.597477	0.115417	Q9CQJ8	Q9CQJ8	NADH dehydrogenase [ubiquinone] 1 beta subcomplex subunit 9
-0.548193	-0.212375	0.508205	-0.359283	-0.388457	-0.0233244	-0.270588	-0.272126	-0.17364	0.802303	0.37756	-0.00104826	1.29333	0.0956252	-0.0168624	0.63792	-0.458574	-0.529796	1.18812	-0.248663	-0.209482	-0.156543	-0.386333	-0.0730813	0.240457	-0.439533	-0.141435	-0.262114	-0.243048	0.458535	0.102765	-0.290318	17314	2	1.48543	2.07253	0.781103	0.224725	0.157686	0.0835553	0.0677164	1.41292	-0.555701	0.0219083	0.217506	0.118238	0.0327018	P50543	P50543	Protein S100-A11
0.301932	0.620534	-0.459924	0.531411	0.530806	0.554749	0.936539	0.349914	-0.826454	-0.273954	-0.707971	1.09176	-0.646989	-0.523015	-0.765746	0.265299	0.38859	-0.210046	0.443301	-0.508388	0.270134	0.499926	-0.307609	-0.743033	-0.781706	-0.0665984	0.247239	1.09323	-0.818286	-0.889638	0.524736	-0.120741	54375.3	3	1.08236	2.00479	-1.43309	0.363578	-0.525657	1.01015	-0.670366	0.127648	0.237062	0.022226	0.596535	0.271627	0.0827253	Q9CX60	Q9CX60	Protein LBH
-0.287547	0.498946	-0.227143	-0.380769	-0.367024	-0.476716	0.0427104	0.180971	-0.4237	-0.178535	0.658332	2.01949	-0.392905	0.179917	-0.238073	0.254015	-0.150122	-0.475443	-0.347407	-0.00702352	-0.206779	-0.136752	-0.481483	-0.0351299	-0.0700193	-0.0972685	0.443327	-0.201366	0.180349	0.450598	0.0250523	0.247499	15872.5	2	0.881055	0.529664	0.37004	2.17891	0.552518	0.248826	-0.134343	NaN	0	0.0225296	0.823122	0.63663	0.131506	P15208	P15208	Insulin receptor;Insulin receptor subunit alpha;Insulin receptor subunit beta
-0.360442	-0.244936	0.156996	0.129315	-0.265712	0.635184	0.0754288	0.451427	-0.348764	-0.153624	-0.157452	-0.178287	0.681524	-0.31065	-0.188815	-0.359705	-0.153332	-0.03169	-0.57152	0.745699	0.249234	0.706037	1.12104	0.238455	-0.725762	0.106069	0.0324468	-0.33037	0.269926	-0.250373	-0.532129	-0.435225	15924.9	3	1.01503	0.649236	-0.295469	1.22712	-0.753019	0.262209	0.192202	0.402621	-0.265348	0.0225375	0.867444	0.301037	0.0965983	Q5U430	Q5U430	E3 ubiquitin-protein ligase UBR3
-0.421201	-0.149145	0.0799389	-0.160217	0.38569	1.24582	0.62005	0.109997	-0.316867	-0.607909	-0.548899	-0.704464	-0.196876	-0.179394	-0.281528	0.226049	0.328352	0.162653	0.0209095	0.729845	0.65181	-0.267144	-0.492989	-0.124972	-0.282213	-0.193915	1.2793	-0.31832	0.194582	-0.402571	0.270377	-0.656749	16545.9	2	1.14205	1.7605	-0.864212	0.375641	-0.298546	NaN	0	0.636478	0.469303	0.0226701	0.445649	0.25053	0.0721016	Q8BXJ8	Q8BXJ8	Zinc finger protein 385B
1.49708	-0.873838	0.980709	0.848492	1.33413	-0.678055	1.1458	1.06477	-0.616342	-0.273852	-0.521722	-0.491029	-0.263327	-0.57799	0.699493	-0.246273	1.00813	-0.471461	0.984528	-0.00894279	0.73661	-0.383224	-0.414152	-0.735131	-0.720932	0.637246	-0.590956	-0.697128	-0.525532	-0.450952	-0.639089	-0.757067	45288.8	2	1.07717	0.761342	-0.89397	1.24744	-1.0085	0.269526	-0.433551	0.738098	-0.548083	0.0228117	0.224144	0.885721	0.0837197	Q3UH45	Q3UH45
0.00697409	-0.0353466	0.693542	0.127748	-0.302226	0.437307	-0.279384	-0.37556	0.123143	0.136193	-0.186877	-0.330423	-0.281449	-0.316828	-0.148671	-0.419505	-0.134115	-0.0980516	0.115109	0.411682	0.24755	0.36034	0.577733	0.269599	-0.42151	-0.140154	0.546066	-0.46921	0.0572539	0.390534	-0.32331	-0.238154	19540.7	3	1.12531	0.68099	-0.289061	1.23453	-0.469478	0.72025	0.28994	0.187674	0.109523	0.0232872	0.216684	0.572659	0.0749352	Q8R151	Q8R151	NFX1-type zinc finger-containing protein 1
-0.366589	0.492349	-0.153915	3.36494	-0.429197	-0.344822	-0.133699	-0.112087	-0.971444	2.45687	0.222222	-0.561278	-0.98153	-0.968076	-0.984185	-0.98442	-0.979904	-0.968981	0.249722	-0.982239	1.13916	1.42293	-0.572921	1.30616	-0.990832	-0.990973	-0.983752	-0.980641	-0.989206	2.37669	2.16534	0.234308	901800	10	1.0216	1.92229	-3.37006	0.46558	-1.77722	0.771441	-1.72443	0.0256957	-0.131589	0.0237353	0.395815	0.465412	0.0951473	P28665;P28666;A0A0N4SVU1	P28665	Murinoglobulin-1
-0.112258	0.557068	-0.348757	-0.824163	-0.605644	-0.474966	-0.300221	0.18738	0.0996779	-0.486001	0.411406	0.372242	0.70668	0.807565	-0.358371	0.494312	-0.535958	-0.0666663	-0.571139	0.619291	-0.256655	-0.0450833	-0.147041	-0.0176443	-0.221128	-0.54112	0.602055	0.066679	0.311233	-0.109764	0.538152	0.248839	577296	3	0.968297	1.23025	0.861712	0.605696	0.367064	0.375306	0.339466	0.199514	-0.155182	0.0247698	0.724639	0.347706	0.107573	P29595	P29595	NEDD8
-0.969649	0.410623	-0.938853	-0.973693	-0.867699	-0.926319	-0.975727	-0.90426	0.572044	-0.970614	-0.396187	0.191607	1.03641	1.43531	-0.819517	-0.661662	-0.970464	-0.948799	-0.944667	4.06498	-0.746878	0.965242	-0.358876	2.2414	-0.27605	-0.894494	2.06927	-0.30483	1.54037	-0.90513	0.378066	0.849044	307148	3	1.43302	1.82893	2.82766	0.353211	0.979443	1.05638	2.26242	0.159066	0.414206	0.0248624	0.106683	0.259468	0.0368962	O08989	O08989	Ras-related protein M-Ras
-0.0432468	-0.393359	-0.306298	5.35876	-0.507211	0.124454	0.63232	-0.518577	-0.335394	-0.0993273	-0.60723	-0.475793	-0.596353	-0.506895	-0.0820472	-0.397528	0.866975	0.057783	3.69701	-0.208271	-0.532978	-0.665741	-0.52348	-0.331789	-0.312606	-0.735869	0.0428627	-0.541477	-0.202401	-0.511488	-0.57633	-0.768476	28066.8	3	0.871583	0.958818	-0.795079	0.91683	-0.847694	0.125112	-0.201335	0.365771	-0.25395	0.0249645	0.516812	0.940056	0.134406	O55135	O55135	Eukaryotic translation initiation factor 6
-0.902312	0.431234	-0.898442	-0.942297	-0.91318	-0.901697	1.04183	-0.900972	1.71222	0.540839	-0.899503	-0.163707	-0.828668	0.403927	1.80717	-0.154323	-0.944416	-0.924137	1.01526	1.24233	-0.936212	1.07162	-0.227973	0.0361529	0.337446	0.944776	0.70833	0.11439	0.149553	-0.222806	0.0720032	-0.868438	189682	4	1.10437	1.40165	2.13925	0.527677	1.03437	0.591231	1.30954	0.101657	0.204667	0.0251696	0.268642	0.417177	0.0786367	Q9D1H6	Q9D1H6	NADH dehydrogenase [ubiquinone] 1 alpha subcomplex assembly factor 4
6.99747	0.913496	0.719719	-0.116893	-0.956936	-0.105467	-0.972181	-0.988546	-0.965172	-0.38481	-0.966973	-0.968838	0.49668	-0.981052	0.731452	-0.985506	0.124131	-0.947593	0.46639	-0.875599	0.303911	-0.578352	2.22335	0.156935	-0.976222	3.24091	0.283861	-0.981079	-0.98229	-0.97549	-0.981349	-0.967968	556626	6	0.869401	0.543853	-1.76874	1.48217	-3.13099	0.232556	0.783908	0.148771	-0.578336	0.0251928	0.921665	0.516207	0.135082	Q923L3	Q923L3	CUB and sushi domain-containing protein 1
-0.115834	-0.477953	0.0426369	-0.322746	-0.25398	-0.502449	-0.433752	-0.256232	-0.554335	1.14708	-0.0164292	0.0579959	0.926307	-0.156742	0.243068	0.0326759	-0.365126	-0.230143	0.35997	0.158381	-0.116077	-0.689459	-0.178399	-0.139101	-0.580579	0.911269	0.978158	1.0658	-0.076026	-0.323445	0.128644	-0.263178	20079.9	2	0.850787	1.48211	0.668592	0.582698	0.438735	0.326511	0.19411	0.0323819	-0.0357465	0.0255511	0.738385	0.62822	0.140998	Q8R4T1	Q8R4T1	Cystin-1
-0.643843	-0.313577	0.31218	-0.551256	0.60898	-0.808891	0.319145	-0.674277	-0.0998096	0.191658	-0.670138	0.375279	0.521363	0.135163	0.511553	0.0508108	-0.297701	-0.823245	-0.80971	0.413537	0.327039	0.196155	0.456063	-0.500748	0.479443	-0.194106	0.0360087	0.000369712	-0.0795037	0.853308	0.714872	-0.0361226	52695.5	2	0.825384	0.898014	0.766639	0.958598	0.812351	0.078362	0.127309	0.242054	0.173021	0.0257141	0.657534	0.946109	0.149491	Q99M01	Q99M01	Phenylalanine--tRNA ligase, mitochondrial
1.30425	-0.571996	-0.0695933	-0.431858	-0.362439	0.167761	-0.235386	-0.478189	0.471561	1.29163	0.427871	-0.433264	0.867863	-0.122147	-0.0220362	-0.311365	-0.249862	-0.2013	-0.709648	-0.327629	-0.311667	-0.516109	-0.348152	-0.717733	0.0331876	-0.0756115	-0.350612	3.42806	-0.572637	-0.367098	0.144652	-0.350506	22978.4	3	1.19007	0.765951	0.535301	1.08348	0.783445	0.87559	-0.554151	0.303628	-0.306006	0.0257201	0.135628	0.660973	0.0645558	Q9D287	Q9D287	Pre-mRNA-splicing factor SPF27
-0.160927	-0.0269287	0.345175	0.378536	1.16456	-0.514459	1.01503	0.920331	-0.707361	-0.281195	-0.423891	-0.444976	0.167349	0.373427	-0.568266	-0.248876	-0.505971	-0.0400921	-0.469077	0.713951	-0.103216	0.642027	-0.179517	0.0439303	-0.247089	-0.708119	0.0715438	0.788994	-0.0525039	0.0555135	-0.56727	-0.430625	19895.5	2	1.05041	1.62932	-0.932506	0.358707	-0.298806	0.635982	-0.437486	0.205505	0.196214	0.026054	0.648734	0.236612	0.0890402	P84309;Q01341	P84309;Q01341	Adenylate cyclase type 5;Adenylate cyclase type 6
-0.133625	1.17641	-0.0423789	1.86784	0.00883002	-0.239272	0.838027	-0.317276	-0.45907	1.43831	-0.364434	-0.202729	-0.37268	-0.0545624	-0.495498	-0.62183	1.29147	-0.742655	-0.38386	-0.0971571	-0.422021	0.539391	-0.246201	0.952557	-0.306517	-0.00111904	-0.0635953	-0.67127	-0.619394	-0.595052	-0.212826	-0.447814	22406.1	5	1.04196	1.10971	-0.755394	0.7555	-0.613793	0.451897	-0.442147	0.377472	-0.300546	0.0266676	0.214874	0.810578	0.0907913	Q2TBE6	Q2TBE6	Phosphatidylinositol 4-kinase type 2-alpha
0.162727	0.317762	-0.821815	-0.918308	-0.449103	-0.824858	-0.927847	-0.902519	0.947187	-0.285827	0.376598	-0.0705931	0.470539	0.647769	-0.878232	-0.186245	-0.251471	0.63421	-0.892376	0.416305	0.552455	0.306141	-0.202321	0.396531	0.837668	-0.733125	0.2649	0.821932	0.428087	-0.258113	0.610562	0.411382	123907	2	1.94807	1.56478	1.84808	0.248884	0.336514	1.5418	1.84553	0.251845	0.33396	0.0277971	0.0281336	0.119525	0.0112701	Q921E2	Q921E2	Ras-related protein Rab-31
0.448866	0.208594	-0.515578	-0.694284	-0.106129	-0.395	-0.387385	-0.292372	0.219166	-0.475415	0.469189	-0.0261022	0.502315	0.240313	-0.0327478	0.041653	-0.270887	-0.161129	-0.590226	0.598443	-0.116654	-0.0557849	-0.413237	0.436402	0.74506	-0.309784	0.565075	-0.0705299	0.105869	-0.262205	0.597521	-0.00301593	206182	8	0.904904	1.1575	0.602578	0.66658	0.3769	0.365507	0.276468	0.0749216	0.0507901	0.0279313	0.445003	0.59739	0.124479	Q9EQQ9	Q9EQQ9	Protein O-GlcNAcase
-0.0472824	0.00743647	-0.711871	-0.739629	-0.163946	-0.127972	-0.511981	0.105325	0.310189	-0.505165	-0.00594344	0.199268	0.800291	0.53954	-0.189253	-0.13138	-0.53224	-0.155457	-0.581657	0.167144	-0.113361	0.571917	-0.198437	0.443451	0.322653	-0.508825	0.755449	0.334771	0.238083	-0.0987814	0.293212	0.234454	316893	6	1.03097	1.16996	0.716921	0.631449	0.390486	0.553608	0.432168	0.144356	0.105733	0.0283439	0.270953	0.501126	0.0931164	Q7TNL5	Q7TNL5
-0.716153	-0.506951	0.145102	1.73634	-0.276339	-0.191216	0.0386057	-0.172744	-0.332583	-0.163684	-0.667207	-0.193752	-0.717344	0.309708	0.188057	-0.523277	3.01009	-0.393597	1.12027	0.760953	-0.0903726	-0.144314	0.222815	-0.0952295	-0.544378	0.44587	-0.35409	-0.518254	-0.41725	-0.27708	-0.351935	-0.330063	22838.1	4	1.15784	0.35826	-0.351501	1.73917	-0.963019	0.740856	0.643492	0.0333717	0.0319741	0.0285119	0.245319	0.291838	0.0695287	Q3TVI8	Q3TVI8	Pre-B-cell leukemia transcription factor-interacting protein 1
-0.589282	0.0144204	-0.897988	-0.17868	-0.818053	-0.125031	-0.862936	-0.713964	1.24526	-0.347975	0.219781	0.189315	0.564578	0.319229	-0.422006	0.0143909	-0.262856	-0.832099	-0.406522	0.225257	0.386598	2.05736	0.136867	0.277156	0.00410757	-0.334757	0.528682	0.421644	-0.773946	-0.142448	0.383556	0.720337	65742.9	3	1.86058	2.29865	1.69076	0.0218148	0.0342418	1.39142	1.41401	0.25117	-0.242503	0.0285989	0.128237	0.03496	0.0137854	O70166	O70166	Stathmin-3
0.910442	-0.479578	0.351692	1.98285	0.34686	-0.255187	0.667764	-0.657542	0.0342725	0.534811	-0.688781	-0.807253	-0.567192	-0.386231	0.259543	-0.0937796	4.3631	-0.0897763	0.628349	-0.506027	-0.835078	-0.602894	-0.357984	0.471801	-0.669424	-0.827742	-0.607512	0.26054	-0.743264	-0.635298	-0.538856	-0.462622	33109.6	3	1.05949	0.816764	-0.789215	0.982846	-1.06726	0.264724	-0.405075	0.76391	-0.683119	0.0288098	0.187532	0.73254	0.0871981	O70493	O70493	Sorting nexin-12
-0.379263	-0.489176	-0.200187	0.514485	-0.533351	-2.97326e-05	-0.573852	0.386804	-0.0392671	-0.33027	-0.119176	0.260468	1.4679	0.120053	0.0149208	-0.52379	-0.193625	-0.399001	-0.360553	0.152338	0.264879	-0.594861	-0.34213	-0.0100485	0.124407	0.237068	-0.307832	-0.240624	0.975112	0.242589	0.705908	0.170108	21538	2	0.845328	0.558346	0.396445	1.43835	0.613678	0.0234864	0.0212675	0.349836	0.238501	0.0291399	0.559018	0.624786	0.142781	Q9QWR8	Q9QWR8	Alpha-N-acetylgalactosaminidase
-0.335832	0.356546	-0.424707	-0.511372	0.180571	0.132011	-0.516742	-0.216093	0.0187921	-0.0136702	0.434827	0.532124	0.654188	0.743834	-0.402927	0.162659	-0.386068	-0.217552	-0.594186	0.389937	-0.18885	0.0210919	-0.197385	0.325854	0.277691	-0.0346329	0.0604084	-0.102299	-0.327233	0.000393692	0.504925	-0.326304	22611.1	2	0.988588	1.42928	0.63856	0.400167	0.21828	0.149879	0.112157	0.690555	-0.308123	0.02956	0.604096	0.270242	0.102662	Q9R0B7	Q9R0B7	Zinc finger protein 346
-0.0184489	-0.475493	0.81821	0.446605	-0.0167975	0.212777	0.123325	-0.127521	-0.685905	0.251612	-0.460144	-0.558382	-0.364723	-0.741403	-0.0350368	0.0282629	-0.331132	0.31461	-0.203119	0.828005	0.124907	-0.150211	0.299719	0.351358	-0.789205	0.748013	0.0188136	1.6848	-0.385768	-0.1885	-0.640083	-0.0791409	18334	4	0.927159	1.51851	-0.83683	0.492941	-0.461386	0.0806225	0.0553155	0.386802	0.430759	0.0299212	0.398989	0.513658	0.118261	A2BDX3	A2BDX3	Adenylyltransferase and sulfurtransferase MOCS3;Molybdopterin-synthase adenylyltransferase;Molybdopterin-synthase sulfurtransferase
0.0651366	0.143838	-0.363527	-0.423417	-0.324386	-0.530555	-0.00942478	-0.0115206	0.870226	-0.163264	0.213737	0.132468	0.144886	0.490814	-0.142933	-0.338062	-0.366462	0.0235337	-0.567799	0.594875	-0.253492	-0.060565	-0.312387	0.375749	0.176953	-0.372539	0.294952	-0.041597	0.27043	0.0548143	0.534043	-0.104526	190849	9	0.780755	1.21314	0.488366	0.607604	0.313546	0.202467	0.136831	0.0624737	-0.0379889	0.0311524	0.781762	0.624669	0.16567	Q08460	Q08460	Calcium-activated potassium channel subunit alpha-1
-0.481552	0.20021	-0.311218	-0.779021	-0.147654	-0.049959	-0.473688	-0.0423182	-0.0254728	-0.211736	0.237596	0.170489	0.175079	0.518726	-0.209106	-0.282787	-0.685949	0.188376	-0.394872	0.502998	0.0121865	0.030718	0.125362	0.266001	0.224497	-0.332602	0.67817	0.208619	0.0655249	0.346306	0.0509121	0.426164	403088	12	1.17736	1.18307	0.608124	0.600804	0.35255	0.623037	0.463271	0.517111	0.207698	0.031173	0.124264	0.550956	0.0664721	Q9D0I9	Q9D0I9	Arginine--tRNA ligase, cytoplasmic
-0.90577	0.500306	-0.26008	-0.740675	-0.730915	-0.283103	0.0637499	-0.0920196	-0.403615	-0.324257	0.659634	0.360441	-0.286774	0.541903	1.33299	0.208009	-0.599603	-0.965169	-0.761301	0.830866	0.448641	-0.047586	0.551469	-0.0841228	-0.312021	-0.207026	0.288312	0.439967	-0.421688	0.0388909	0.615811	0.544739	179817	4	0.743895	1.29049	1.1405	0.623629	0.873605	0.0685623	0.155164	0.134641	-0.111734	0.0311994	0.961333	0.765929	0.180345	P47963	P47963	60S ribosomal protein L13
0.0320814	0.392112	-0.0496979	-0.555234	-0.536852	-0.498643	-0.314667	-0.218443	0.237876	-0.121586	0.346705	0.505034	0.526764	0.426754	-0.205226	-0.138328	-0.275626	-0.0253416	-0.458574	0.171918	-0.0179443	-0.109528	0.499278	0.283111	0.149685	-0.0574668	-0.196144	0.0587143	-0.26696	-0.102853	0.324974	0.194108	4.5696e+06	7	1.38994	1.74958	0.680494	0.082545	0.0435672	0.838428	0.414844	0.652857	-0.222082	0.0316862	0.551978	0.0565127	0.0407437	P09671	P09671	Superoxide dismutase [Mn], mitochondrial
-0.0827076	0.499381	-0.777843	-0.754726	-0.710381	0.460068	-0.834679	-0.865532	-0.100248	-0.474722	0.53787	0.403711	0.691135	0.688384	-0.667413	0.432852	-0.795399	0.0965216	-0.650543	0.389415	0.54103	0.443849	0.408522	0.100852	-0.226667	-0.206516	0.691271	0.366391	0.0758479	-0.359698	0.310942	0.369031	72750	2	1.46605	1.4424	1.36805	0.279314	0.277734	1.01745	1.1324	0.0419668	0.0420887	0.0318076	0.118039	0.145567	0.0341938	Q9D958	Q9D958	Signal peptidase complex subunit 1
-0.171904	0.531864	-0.207689	-0.904908	-0.621147	-0.680877	-0.590507	-0.227449	1.65885	-0.366098	0.168444	0.150322	0.653931	0.882041	0.149241	0.188205	-0.41817	-0.437012	-0.307047	0.720422	0.0297619	-0.214636	-0.320647	0.813521	0.765611	-0.526442	0.189385	-0.501963	-0.392905	-0.158403	0.485788	-0.339587	305158	6	1.6967	1.97419	1.42039	0.0864267	-0.0810027	0.964572	0.841742	1.15758	-0.659655	0.0323567	0.761759	0.0175419	0.0201048	Q9JHU2	Q9JHU2	Palmdelphin
-0.137988	0.274172	-0.2439	-0.311689	-0.201859	-0.293392	-0.316562	-0.208141	-0.111903	-0.00317167	0.0608907	-0.0499186	0.331906	0.401701	0.133792	-0.0233561	-0.322749	0.023413	-0.0503242	0.0729777	0.0287633	0.0426655	0.120248	0.294668	0.299421	-0.312717	0.200101	0.224298	-0.25054	0.132169	0.208365	-0.0113418	418648	6	1.54826	2.19607	0.42529	0.0821868	0.0344627	1.48244	0.331856	0.156545	-0.0589712	0.0324583	0.19238	0.0660113	0.0282969	Q8BVQ5	Q8BVQ5	Protein phosphatase methylesterase 1
-0.343411	0.19139	-0.572511	-0.490746	-0.633092	-0.31896	-0.364772	-0.108717	0.508789	-0.132425	-0.120258	0.0854072	0.636601	0.646108	-0.459448	-0.0590318	-0.341455	-0.27174	-0.533859	0.713163	0.287788	0.27159	-0.20304	0.126682	0.0886939	-0.629849	0.85995	0.452375	0.198001	-0.260981	0.415442	0.362315	2.55609e+06	6	1.23381	1.82375	0.76895	0.270476	0.215315	1.1358	0.568355	0.0156379	0.0147204	0.0329313	0.194491	0.217308	0.0583699	P19536	P19536	Cytochrome c oxidase subunit 5B, mitochondrial
-0.0981045	-0.100607	0.0465639	0.357137	-0.156338	0.135029	0.129211	-0.0728769	0.0184281	0.213754	-0.151062	-0.0965495	-0.0508292	-0.147342	-0.297489	-0.276523	0.309186	-0.163033	0.04467	-0.212541	0.265021	0.0279649	0.264141	0.391021	-0.307093	0.0480523	0.157956	-0.196241	-0.108925	-0.0439983	0.0406118	0.0308051	147855	14	0.874673	0.881377	-0.195805	0.861187	-0.21734	0.341678	0.104449	0.287343	0.0829134	0.0331315	0.318168	0.907837	0.133453	Q9R1V6	Q9R1V6	Disintegrin and metalloproteinase domain-containing protein 22
-0.0565495	-0.0362806	0.675657	0.296483	1.29659	-0.255792	-0.0975109	-0.291079	0.530123	0.148402	0.163517	0.00846735	-0.186966	-0.305742	-0.497395	-0.450142	-0.508437	-0.163208	-0.0383418	0.118177	0.0317203	0.0773137	1.02465	0.468745	-0.420607	-0.566488	-0.45899	0.115665	-0.196183	-0.251224	-0.424253	0.249684	18287.2	3	0.878482	0.595416	-0.343437	1.17692	-0.559609	0.0886155	-0.0703883	0.504937	-0.286561	0.0331534	0.38331	0.595916	0.132287	Q8K224	Q8K224	N-acetyltransferase 10
-0.371866	0.173272	-0.147955	-0.637575	-0.113759	-0.486073	-0.385958	-0.184287	0.406587	-0.322973	0.220291	0.0770962	0.934555	0.0161848	-0.0589745	0.319246	-0.453259	0.151829	-0.461495	0.523067	0.215233	-0.233943	0.0339949	0.620025	0.261255	-0.0398106	0.286119	-0.0864024	-0.286591	-0.0997247	0.257834	-0.125942	140368	2	1.44041	2.01956	0.734831	0.0591752	0.0398774	0.969046	0.494435	0.501452	-0.200519	0.0332354	0.402697	0.0542565	0.0362737	P17225	P17225	Polypyrimidine tract-binding protein 1
-0.0972861	0.252003	-0.382093	-0.224945	0.0845539	-0.201179	-0.107153	-0.108297	0.221042	-0.301311	0.25958	0.00884128	0.278003	-0.144327	-0.171909	-0.086058	-0.0278971	-0.214861	-0.643908	-0.897427	-0.028334	-0.0848041	0.2701	0.0928936	0.345975	0.0321703	0.236087	0.790711	0.792945	-0.242225	0.115242	0.183867	183458	5	1.10283	0.478096	0.15812	1.20023	0.915582	0.457833	-0.429944	1.01059	0.327518	0.0334622	0.832597	0.125842	0.0789172	O88545	O88545	COP9 signalosome complex subunit 6
0.231558	-0.247571	0.284952	0.160464	0.793985	0.0328099	-0.0607337	-0.0537164	0.111671	0.408607	-0.319186	-0.398152	-0.365437	-0.240241	-0.207796	-0.230224	1.23821	-0.038223	0.0551339	0.0182324	-0.114273	-0.0932413	-0.356441	0.0681278	-0.176081	0.389492	-0.0498427	0.0317686	-0.117418	-0.0487392	-0.370705	-0.336991	480205	5	0.800196	1.39168	-0.449064	0.453184	-0.212432	0.188312	-0.104207	0.29223	0.132426	0.0342767	0.92504	0.432665	0.158418	P48453	P48453	Serine/threonine-protein phosphatase 2B catalytic subunit beta isoform
-0.761043	-0.324845	-0.532984	-0.19981	-0.133685	-0.059718	-0.534867	-0.397898	-0.259999	0.421848	0.83702	0.910422	1.31743	-0.523378	-0.28833	-0.457292	-0.367083	-0.578607	-0.355756	-0.206236	0.181435	0.37903	0.874813	0.106428	0.159259	-0.259721	0.0272613	-0.0733633	0.192034	0.987686	-0.237379	0.157329	19712.4	2	1.21764	1.33214	0.854949	0.3596	0.236243	1.08765	0.63333	0.0142225	0.0146232	0.0343085	0.197113	0.217496	0.0605848	Q80W22	Q80W22	Threonine synthase-like 2
-0.0420059	-0.104997	-0.0904726	-0.559387	0.0113379	-0.18444	0.154275	0.116012	-0.04093	-0.178453	-0.0239067	0.0528292	0.333359	0.241284	0.285309	0.148844	-0.308132	0.118754	-0.155078	0.539619	-0.187094	-0.223085	-0.467781	-0.0424567	-0.114506	-0.262876	0.234742	0.0648371	0.492956	-0.0229513	0.13418	0.0802131	5.76266e+06	16	0.707677	0.973021	0.304799	0.761297	0.280325	0.0338465	-0.0214846	0.128252	-0.0459583	0.0345604	0.799761	0.926624	0.19603	P05202	P05202	Aspartate aminotransferase, mitochondrial
-0.121833	0.0256728	-0.23268	-0.618534	-0.26352	-0.298432	-0.210918	-0.0911675	-0.0964628	-0.289994	0.248298	0.168757	0.696751	0.434034	-0.0544518	-0.0998383	-0.47797	0.0829871	-0.375647	0.725669	-0.170827	-0.0708024	-0.319205	0.615405	-0.0986736	-0.410094	0.489719	0.176379	0.222755	-0.0177929	0.196511	0.235905	1.71858e+06	7	0.944379	1.64196	0.538807	0.357433	0.210113	0.549684	0.300179	0.0499489	-0.0285151	0.0348388	0.427851	0.338658	0.113664	P00493	P00493	Hypoxanthine-guanine phosphoribosyltransferase
0.125105	0.166027	0.0283155	-0.455709	-0.0718186	-0.259348	-0.221842	0.000489151	-0.105695	-0.157008	0.27826	0.0510898	0.168589	0.386793	-0.0272674	0.302672	0.0433325	0.575318	-0.342451	-0.630991	0.136351	-0.194513	-0.401159	-0.00733966	0.235131	-0.0123925	-0.289908	0.154996	0.146385	-0.0843444	0.282103	0.18083	1.40511e+06	7	0.742387	1.08097	0.300503	0.761761	0.359153	0.160721	-0.10711	0.136487	-0.0484602	0.0348794	0.605117	0.84513	0.180973	Q01768	Q01768	Nucleoside diphosphate kinase B
-0.231345	0.215999	0.0593374	-0.777538	-0.32766	-0.0123742	-0.431371	-0.0399452	0.553106	-0.167758	0.0524914	0.341119	0.00730044	0.0240068	-0.00730684	-0.0536397	-0.319033	-0.193503	-0.326702	0.12329	-0.0134691	0.0355106	0.352257	0.151043	0.116625	-0.184556	0.258268	0.532655	-0.288632	0.165286	0.22198	0.164556	219071	4	1.07429	1.1056	0.558585	0.56305	0.206137	0.634223	0.381018	0.0642814	0.028569	0.0351131	0.245575	0.31619	0.0842763	Q6PHZ8	Q6PHZ8	Kv channel-interacting protein 4
-0.217911	0.32809	-0.535726	-0.491178	0.0487729	-0.502574	-0.618834	-0.101725	0.235686	-0.288019	0.687795	0.164402	0.704456	0.682593	-0.262626	0.0991239	-0.471037	0.123154	-0.574223	0.564922	-0.292849	-0.07689	-0.103087	0.27136	0.387546	-0.286346	0.531849	-0.692943	-0.0314932	0.247762	0.3489	0.121048	161465	13	0.986548	1.85415	0.814844	0.226389	0.191295	0.521608	0.343639	0.39606	-0.27991	0.0353792	0.889631	0.181511	0.103146	Q9Z1X4	Q9Z1X4	Interleukin enhancer-binding factor 3
-0.204423	-0.122532	0.172191	0.521976	0.00765725	0.16719	-0.0226681	-0.338468	-0.315071	0.210848	-0.290039	-0.190012	-0.076293	-0.109134	-0.201383	-0.0470786	0.429333	-0.000382288	0.438549	-0.404346	0.313914	0.0778823	0.442796	0.194084	-0.103612	0.228266	-0.366244	-0.361179	0.194673	-0.196679	-0.166778	0.116965	306017	15	0.900132	0.663362	-0.208109	1.0233	-0.363434	0.49361	0.207163	0.122063	0.0518377	0.0356714	0.32579	0.553452	0.125854	O88485	O88485	Cytoplasmic dynein 1 intermediate chain 1
1.49152	1.29999	0.871333	0.400166	1.69846	-0.591478	-0.375393	-0.325171	1.20178	-0.322794	0.592361	-0.777989	-0.514175	-0.238444	-0.724586	-0.643352	0.754692	-0.28501	0.890341	-0.106762	-0.207524	-0.504698	-0.598115	-0.5601	-0.532035	1.2489	-0.367543	-0.776833	-0.352939	-0.428763	-0.804706	-0.411142	29989.3	3	0.985633	1.11409	-1.06357	0.579827	-0.56764	0.774825	-0.696082	0.13788	-0.200151	0.0358331	0.235827	0.508103	0.103364	Q6VNS1	Q6VNS1	NT-3 growth factor receptor
0.0387308	-0.196632	0.286087	-0.259884	-0.465233	0.165676	-0.469837	-0.543233	-0.134377	0.410165	0.476349	0.166784	0.139002	0.733755	0.285884	-0.240649	-0.469153	0.211712	-0.0334692	-0.307137	-0.283774	0.269579	-0.0253409	-0.307157	-0.0843619	0.337754	0.716145	-0.225534	0.108576	-0.657249	-0.016039	0.372861	17433.9	2	0.895067	NaN	0	NaN	0	NaN	0	NaN	0	0.0365755	0.713802	0.274662	0.127331	P05214;Q9JJZ2	P05214;Q9JJZ2	Tubulin alpha-3 chain;Tubulin alpha-8 chain
-0.281542	-0.349363	0.933144	3.40439	0.0529504	-0.139618	-0.593635	-0.641025	-0.327139	1.20312	-0.47099	-0.593585	-0.392381	-0.587032	-0.553202	0.211472	0.232321	-0.592463	1.11088	0.152619	0.0927732	0.252991	0.449095	-0.0687989	-0.267711	1.02771	-0.756382	-0.686632	-0.531634	-0.409329	-0.652134	-0.228858	27113.9	4	0.787579	0.397965	-0.45037	1.52878	-1.00851	0.224809	0.262718	0.277571	-0.295419	0.0367766	0.961143	0.408574	0.163088	P84244;P68433;P02301;P84228	P84244;P68433;P02301;P84228	Histone H3.3;Histone H3.1;Histone H3.3C;Histone H3.2
0.0814314	-0.462166	-0.105975	0.0167865	-0.438357	-0.302605	-0.556678	-0.749427	-0.163376	-0.275425	-0.25597	0.0727649	0.246087	0.168383	0.0760127	-0.665058	-0.131045	-0.398335	-0.660369	0.530115	-0.681208	0.720482	-0.410806	-0.474892	-0.287313	-0.328281	-0.345759	2.60059	2.3502	-0.344184	1.06975	0.104627	19741.5	3	0.959187	NaN	0	0.989287	0.867619	NaN	0	0.653665	0.559975	0.0377303	0.260149	0.472166	0.109853	Q9Z2A0	Q9Z2A0	3-phosphoinositide-dependent protein kinase 1
-0.337027	0.298945	-0.00791715	-0.899494	-0.288238	-0.232913	-0.368128	-5.98483e-05	0.137195	-0.20974	0.376055	0.456139	0.0923023	0.189417	0.0994319	0.188163	-0.284739	0.0336762	-0.276354	0.36767	0.0943477	0.0544062	-0.273186	0.257352	0.0212647	-0.158377	0.243487	0.0342038	-0.0385495	0.135083	0.349647	-0.0540652	151469	4	1.24167	1.20266	0.836111	0.364331	0.12463	0.727492	0.587894	0.48282	-0.123586	0.0380534	0.301709	0.118109	0.0573232	Q9DAW9;Q08093	Q9DAW9	Calponin-3
0.0947826	-0.450943	-0.26412	0.584852	-0.328195	-0.139732	-0.00220045	1.22532	-0.0916429	-0.515897	-0.194426	-0.219662	0.293853	-0.598287	-0.473676	-0.331125	0.450126	0.231885	0.340945	0.417267	-0.174346	0.269866	-0.392908	0.474063	-0.374331	-0.468928	-0.0880282	0.0818877	0.0439139	-0.251077	0.526869	0.323892	14524.4	4	1.11732	0.957075	-0.519081	0.686596	-0.32752	0.35718	0.228013	0.856276	0.419574	0.0395186	0.109722	0.628894	0.0763267	G5E870	G5E870	E3 ubiquitin-protein ligase TRIP12
0.409399	0.201946	-0.173197	-0.49093	-0.202967	-0.590941	-0.186164	-0.264522	0.325115	0.0680376	0.1071	-0.347007	0.362788	0.160576	-0.270292	-0.243769	-0.0817334	-0.00797229	-0.362538	0.445488	-0.142487	-0.0918267	0.0489281	-0.209344	0.105378	-0.150565	0.553537	-0.0405786	0.674068	-0.0788188	0.171765	0.301526	511246	7	1.03682	0.687521	0.335254	1.08579	0.32525	0.492428	0.245256	0.618819	0.235252	0.0398259	0.128011	0.974181	0.0918706	Q922R8	Q922R8	Protein disulfide-isomerase A6
-0.309143	0.026861	0.770737	-0.111463	0.27855	0.183771	0.324009	0.201399	-0.671949	0.540604	-0.299243	-0.140547	-0.58088	-0.606422	0.626603	0.257851	0.434271	0.500098	0.368939	-0.201132	0.162246	0.135473	0.44127	-0.698764	-0.816783	0.572363	-0.366387	-0.542312	0.0916649	-0.0410466	-0.628607	0.0979699	30291.3	3	0.698972	0.920315	-0.588642	0.765654	-0.655048	0.157905	-0.124388	0.154492	-0.190793	0.0399145	0.589313	0.909219	0.199999	P50586	P50586	Tubby protein
-0.00152999	0.184854	-0.282505	-0.52143	-0.190174	-0.532873	-0.23919	0.00750014	0.237081	-0.0940403	0.294831	-0.0571428	0.595709	0.58745	-0.0764529	0.0302559	-0.365448	0.202738	-0.645453	0.664156	-0.388203	0.0204524	-0.218098	0.333749	0.237912	-0.47921	0.650431	-0.190768	-0.198313	-0.0506674	0.412888	0.0714902	168308	4	0.809075	1.89186	0.6009	0.300794	0.219833	0.21909	0.164444	0.460547	-0.216624	0.0401039	0.892118	0.326106	0.155212	Q8CI32	Q8CI32	BAG family molecular chaperone regulator 5
-0.248166	0.271302	-0.210233	-0.599091	-0.17186	-0.452762	-0.179761	-0.039877	-0.000690343	-0.220579	0.255691	0.127406	0.277447	0.420967	-0.235877	0.092984	-0.242962	0.316761	-0.477334	0.351495	0.0384977	-0.211863	0.171923	0.323594	0.170983	-0.0931094	0.276068	0.0145467	-0.0502232	0.174117	0.248417	-0.0978115	1.5949e+06	21	1.20716	1.45206	0.494002	0.266085	0.118725	0.826728	0.381133	0.014807	0.00585556	0.0401239	0.184843	0.198074	0.0620636	Q9Z2I0	Q9Z2I0	LETM1 and EF-hand domain-containing protein 1, mitochondrial
-0.299838	0.322971	-0.38267	-0.388366	-0.451905	-0.226272	-0.273727	0.216927	0.429168	-0.45456	0.522349	-0.0980097	0.276881	0.489484	-0.0661497	-0.00963549	-0.219634	0.0709288	-0.402556	0.381739	-0.219673	-0.0391229	-0.235861	0.206074	0.234737	-0.385016	0.598003	-0.0649897	-0.127909	-0.0726715	0.546837	0.122468	7.75906e+06	4	0.813277	1.16809	0.480533	0.483085	0.217576	0.520001	0.232828	0.0446742	-0.0301292	0.0401652	0.537132	0.424432	0.153717	Q91ZZ3	Q91ZZ3	Beta-synuclein
0.437393	-0.624006	0.0408345	1.22237	0.854865	0.503556	0.715591	-0.0137712	-0.538501	0.531731	-0.284725	-0.589197	-0.345908	-0.718953	-0.11855	-0.0624072	0.77952	0.0403461	0.400279	0.00997321	-0.127383	-0.478064	-0.671064	0.120894	-0.27954	0.741428	-0.649541	0.0645064	0.343508	-0.601626	-0.283039	-0.420525	28641.4	5	0.910884	1.50592	-0.943298	0.279817	-0.259842	0.589821	-0.468249	0.225095	0.215207	0.0406095	0.65509	0.23281	0.122777	Q9WVR4	Q9WVR4	Fragile X mental retardation syndrome-related protein 2
-0.593903	-0.50045	-0.0937145	-0.307185	-0.312752	-0.58658	-0.437619	-0.0811965	1.27239	0.307194	-0.375817	0.228591	0.0472619	0.616646	-0.319249	-0.643574	-0.545446	-0.518017	-0.505708	1.55928	-0.135181	-0.0852399	-0.385385	0.35965	1.04266	-0.569719	0.732339	-0.330654	0.458085	-0.303981	0.391767	0.615504	19463.3	3	0.854261	NaN	0	0.532378	0.45823	0.591354	0.411559	0.155353	0.164161	0.0407031	0.297557	0.65182	0.139875	Q6PDH0	Q6PDH0	Pleckstrin homology-like domain family B member 1
0.044617	0.0324208	0.40971	0.297568	0.529271	-0.00146036	0.296688	0.159463	-0.340279	0.389407	0.231124	-0.309162	-0.0820479	-0.165652	0.393869	-0.195763	0.0654862	0.498533	-0.263274	-0.397784	-0.0290562	0.00866063	0.214151	-0.228387	-0.178664	-0.287161	-0.614659	-0.189036	-0.618996	0.246588	0.0886187	-0.00479211	159082	7	1.37723	1.17292	-0.344806	0.654304	-0.348422	1.23609	-0.350103	0.659152	-0.353719	0.040721	0.037956	0.99115	0.041954	P97355	P97355	Spermine synthase
0.0249397	-0.580359	-0.452677	-0.115354	0.239362	-0.336482	-0.409093	-0.0884869	0.417429	-0.468469	1.83118	0.257795	0.390771	0.0725742	0.53351	0.0146876	-0.60385	-0.152311	-0.172396	0.328653	-0.513549	-0.219239	-0.393917	0.799354	-0.143263	-0.479348	0.459569	-0.197587	0.442802	0.108052	-0.357454	-0.236846	17477.8	2	1.04979	1.60518	0.759637	0.234093	0.177625	0.110124	0.0911927	0.889363	-0.490819	0.041012	0.368829	0.194163	0.0891674	Q9EP96;L7N264;Q9QXZ6;Q99J94;Q91YY5	Q9EP96;L7N264;Q9QXZ6;Q99J94;Q91YY5	Solute carrier organic anion transporter family member 1A4;Solute carrier organic anion transporter family member 1A1;Solute carrier organic anion transporter family member 1A6;Solute carrier organic anion transporter family member 1A5
0.286061	-0.147834	0.088372	1.58497	0.472271	0.107917	0.463056	0.25494	0.00849941	0.196208	-0.45559	0.769186	-0.420575	-0.697032	-0.222371	-0.568554	2.05843	-0.418117	-0.195567	-0.303861	-0.0274991	-0.416416	-0.737133	-0.187422	-0.551776	-0.785318	-0.288443	2.35656	-0.564515	-0.426164	-0.449287	-0.783007	31362.4	4	1.21142	1.69796	-0.884515	0.429402	-0.517219	1.2037	-0.782016	0.351301	-0.41472	0.0410343	0.0781105	0.579081	0.0614581	Q9JHR9	Q9JHR9	Nuclear receptor-interacting protein 2
-0.717415	-0.539331	-0.402203	0.0210176	-0.555505	-0.401003	1.02616	0.126695	-0.500313	1.4306	-0.346318	-0.190339	0.719464	-0.259284	0.590019	0.435471	-0.319829	-0.390804	0.202425	-0.898446	0.298735	-0.933122	-0.599069	-0.959596	-0.475531	1.15399	-0.939667	0.264171	3.0423	-0.00639461	0.252403	-0.129286	216696	4	1.07377	0.836799	0.659247	0.916897	1.54651	0.841781	-1.17574	0.164514	-0.288484	0.041084	0.166208	0.396344	0.0843788	P62806	P62806	Histone H4
-0.268386	0.299428	0.21413	0.398666	0.201222	-0.0705925	0.166532	-0.0836596	0.251275	0.143168	-0.990578	0.268065	-0.980175	0.506299	-0.986581	0.0655522	-0.0543557	-0.149713	0.246998	-0.529277	0.32992	0.0363276	0.17271	0.560471	0.366907	0.201379	-0.979205	0.688616	-0.982357	0.357957	0.478024	0.12123	1.26263e+06	4	0.775933	1.08587	-2.25128	0.537606	-1.12777	0.156956	-0.086828	0.285349	1.03668	0.041311	0.552523	0.482874	0.16752	Q9D6F4	Q9D6F4	Gamma-aminobutyric acid receptor subunit alpha-4
-0.0634316	-0.0644278	0.00350416	0.0392397	0.230353	0.148521	0.0583028	0.108318	-0.0881739	0.175156	-0.331246	-0.00527977	-0.205442	-0.0824953	-0.00840084	-0.0136817	0.0186489	-0.0863977	0.255444	-0.09015	0.199068	0.141232	-0.118462	0.128461	-0.0476239	0.270704	-0.335082	0.196528	0.0757385	-0.12107	-0.286843	-0.101011	602209	16	0.644239	1.17448	-0.196921	0.600492	-0.16375	0.0338899	-0.00822234	0.0623248	0.0249488	0.0415837	0.921806	0.845694	0.226862	Q62418	Q62418	Drebrin-like protein
-0.25547	0.300407	-0.175255	0.211279	-0.437207	-0.219426	-0.225376	-0.074807	0.153649	-0.0997738	0.429265	0.232218	0.438571	0.175574	-0.257761	0.0684599	-0.277698	0.0839399	-0.164633	-0.425547	-0.0203099	-0.517341	0.220496	0.338617	0.628462	-0.0425921	-0.15947	0.160093	-0.376965	0.0526205	0.304076	-0.0680956	111750	7	0.693356	1.25891	0.376249	0.531044	0.257699	0.0129491	-0.00865126	0.294208	-0.127201	0.0417894	0.651065	0.692951	0.202602	Q8BTX9	Q8BTX9	Inactive hydroxysteroid dehydrogenase-like protein 1
0.0980973	0.407424	-0.827858	-0.542552	-0.727506	-0.659534	-0.856067	-0.244877	1.38288	-0.32697	0.529757	0.347332	1.01524	0.210952	-0.751645	-0.585772	-0.642997	-0.489239	-0.771915	1.83706	-0.559292	-0.603131	-0.777171	0.479519	-0.737471	-0.653842	2.28408	0.347458	1.41316	-0.774715	0.242467	0.937124	55814.7	2	0.670621	1.18216	1.17517	0.543453	0.784139	0.201485	0.308875	0.0434054	-0.0821586	0.0421385	0.80716	0.674081	0.213491	A0A338P6I9	A0A338P6I9
0.270296	-0.0641423	-0.0998202	-0.0965223	0.368857	0.58817	0.696027	-0.216971	-0.342471	0.099179	-0.102668	-0.133998	-0.160157	-0.180619	-0.0935241	-0.248901	0.012759	-0.333604	0.0644008	-0.0793582	0.242789	-0.112113	-0.0307888	0.224574	-0.284271	-0.0245684	0.212657	-0.321283	-0.0969725	0.0209285	0.208984	0.0131326	133418	9	1.07197	1.62425	-0.425886	0.13524	-0.0520866	0.58083	-0.21104	0.614495	0.162759	0.0423733	0.831447	0.107394	0.0847288	Q6PDG5	Q6PDG5	SWI/SNF complex subunit SMARCC2
-0.233881	0.0591955	0.0289474	-0.000714234	0.0279291	0.431226	0.12391	-0.265045	-0.749084	0.124939	-0.812626	0.0190607	0.379064	-0.0226594	-0.21243	-0.135544	-0.445206	0.56981	0.215168	-0.433539	0.925791	0.512297	1.09236	-0.0709841	-0.0628771	0.0566234	-0.560485	-0.367394	-0.625285	0.574235	0.187698	-0.3305	97196.4	3	0.711753	0.734226	-0.544709	0.887377	-0.589493	0.339483	0.217866	0.150032	0.173082	0.0429912	0.470984	0.933881	0.194199	Q04736	Q04736	Tyrosine-protein kinase Yes
0.311485	0.0662349	-0.524321	-0.742836	-0.395709	-0.315749	-0.384606	0.203994	0.91391	-0.745078	0.13249	0.0546658	0.633037	0.504184	-0.373037	-0.33666	-0.611937	-0.321436	-0.776821	0.224861	-0.286444	0.157582	-0.467304	-0.0284228	0.635745	-0.609516	0.34067	0.868628	1.41924	-0.475487	0.083476	0.845159	664713	5	0.731275	0.478511	0.438235	1.17355	0.880428	0.0883201	-0.0960071	0.322611	0.346186	0.0430442	0.690648	0.483116	0.185663	Q9WUK2	Q9WUK2	Eukaryotic translation initiation factor 4H
-0.260283	0.150064	-0.0124557	-0.392962	-0.304537	-0.0508786	-0.12072	-0.17546	0.143465	-0.312836	0.0105425	0.0666996	0.226829	0.26995	-0.334578	-0.090718	-0.219632	-0.289313	-0.329801	-0.0358971	0.0208257	0.303756	0.00487378	0.131925	0.000905383	-0.189672	0.801273	0.405504	0.311328	-0.238338	0.124637	0.385502	246986	5	1.03258	0.666739	0.213746	0.932818	0.319809	0.42051	0.144042	0.651299	0.250105	0.0435871	0.129668	0.677576	0.0927734	Q9CR51	Q9CR51	V-type proton ATPase subunit G 1
-0.252162	0.00922738	-0.421663	-0.627883	-0.235658	-0.252269	-0.317475	-0.115106	-0.0184809	-0.356951	0.131617	-0.00872642	0.399016	0.304051	-0.0112355	-0.145111	-0.503056	0.00180556	0.183111	0.703417	-0.230815	0.323525	0.038985	0.222023	0.177562	-0.188405	0.623401	-0.200457	0.489244	0.103166	-0.0448453	0.220149	282949	23	1.72611	1.76192	0.535434	0.189831	0.109123	1.43291	0.566467	0.34339	0.140156	0.0439845	0.0283207	0.173947	0.0187884	A2AGT5	A2AGT5	Cytoskeleton-associated protein 5
-0.136233	0.259736	-0.398137	-0.591924	-0.329679	-0.376303	-0.413172	-0.182227	0.32707	-0.361764	0.318911	-0.0564782	0.595015	0.398376	-0.174173	0.0458665	-0.577516	0.278145	-0.660957	1.21539	-0.226863	-0.0960682	-0.332112	0.296685	0.358056	-0.501424	1.18883	-0.0280285	-0.425096	0.0970145	0.321866	0.167198	382429	9	0.73585	1.87528	0.655367	0.353628	0.314183	0.341433	0.274354	0.0856086	-0.0668302	0.0442868	0.655609	0.46478	0.183717	Q9WUL7	Q9WUL7	ADP-ribosylation factor-like protein 3
0.506123	-0.519551	0.419458	1.03191	0.379081	0.221943	0.86785	0.445177	0.0456	0.676518	-0.319121	-0.960367	-0.943673	-0.977732	0.550001	0.239129	0.617613	-0.256347	4.0683	-0.978444	0.098886	-0.126875	-0.948316	-0.95067	-0.97605	0.819501	-0.93575	0.419575	0.441288	-0.983442	-0.985599	-0.986011	514394	2	1.17746	1.28467	-2.04327	0.567114	-1.7548	1.02457	-1.85624	0.511162	-1.56776	0.0448027	0.0686334	0.874382	0.0664562	Q9WVL5	Q9WVL5	MORC family CW-type zinc finger protein 1
-0.265376	0.0235458	0.154589	0.17539	0.114319	0.0966847	0.158523	0.0291457	-0.273011	0.147154	0.0256129	0.00777787	0.0016769	-0.114699	-0.0249917	0.0791493	-0.0262246	0.00861094	0.241463	-0.127433	0.143489	-0.0287587	0.165123	0.0123448	-0.199272	-0.0105898	-0.276477	-0.306314	-0.108998	0.313868	-0.0282912	-0.108032	299977	27	0.805664	0.50394	-0.110806	1.08921	-0.223558	0.04225	-0.0116601	0.470963	-0.124412	0.0450666	0.400495	0.48515	0.156436	P28738	P28738	Kinesin heavy chain isoform 5C
-0.419311	0.0088052	0.278769	-0.290895	-0.898552	-0.0244996	-0.95922	0.125602	-0.075281	0.179357	0.0112301	0.313218	0.0571158	-0.0273367	-0.0664972	0.23636	-0.197339	-0.311436	-0.00450734	-0.130591	0.384631	0.0648939	0.327994	0.032229	-0.184529	0.275338	0.243816	0.07935	0.414689	0.256352	0.0750491	0.225196	218585	4	1.41535	1.03574	1.18453	0.790087	0.219666	0.902212	1.08079	0.512073	0.115923	0.0457969	0.0857002	0.162005	0.0384282	O55091	O55091	Protein IMPACT
1.27763	-0.171255	-0.336477	1.79163	0.223561	-0.569023	1.08861	0.539377	-0.57368	1.99176	-0.649507	-0.733161	-0.674303	-0.737045	-0.117329	-0.147981	0.944172	-0.447898	0.761421	-0.529998	-0.277583	-0.278916	-0.479457	-0.239238	-0.45	0.151965	-0.553684	-0.474932	0.481402	-0.419887	-0.330995	-0.0591823	33772.7	3	1.03597	1.35497	-1.19895	0.169091	-0.148829	0.769142	-0.626891	0.407528	0.423233	0.0460461	0.754751	0.115024	0.0920523	P29699	P29699	Alpha-2-HS-glycoprotein
-0.651	0.538918	-0.571137	-0.867438	0.208654	-0.428418	-0.218652	-0.0138666	0.0100358	0.0169806	-0.32862	-0.145154	0.910053	1.39514	-0.326594	0.344638	-0.449391	0.0157202	-0.840151	1.13362	-0.0887858	-0.317905	-0.473935	-0.0325038	0.195677	-0.69238	0.762241	-0.277579	0.153842	0.101787	1.16056	-0.224361	80914	2	0.659299	1.13124	0.903907	0.498091	0.505911	0.170118	0.236547	0.165273	-0.16145	0.0463314	0.91237	0.560895	0.21913	A2A8L5	A2A8L5	Receptor-type tyrosine-protein phosphatase F
-0.139983	-0.102659	0.0297904	0.528698	0.361076	0.332556	0.179804	0.0488765	-0.432249	0.42818	-0.05477	-0.222239	0.164522	-0.458356	0.0996998	-0.0690299	0.27469	0.152305	0.20189	-0.099224	0.192673	0.137937	-0.33295	-0.322255	-0.252955	0.165022	-0.182632	-0.315495	-0.213305	0.071897	-0.0560962	-0.115419	46002.6	15	0.760748	0.982544	-0.353055	0.573094	-0.188609	0.529027	-0.185331	0.0376092	-0.0208849	0.0469207	0.43537	0.5331	0.173481	P30999	P30999	Catenin delta-1
-0.275423	0.0865718	0.0620216	-0.667231	-0.0752064	-0.146227	-0.0270138	0.0801737	0.00733926	-0.155165	0.171886	-0.0061839	0.180326	0.176242	0.0951934	0.400418	-0.14913	0.0659236	-0.223327	0.315467	-0.217835	0.0650165	-0.0700336	-0.0378141	-0.014216	0.0312537	0.202925	-0.214341	0.0863908	-0.0509745	-0.00840846	0.311383	220363	11	0.834423	1.06679	0.399038	0.43478	0.112388	0.412355	0.197605	0.362989	-0.0890441	0.0479886	0.664044	0.256203	0.146412	Q8K394	Q8K394	Inactive phospholipase C-like protein 2
-0.484132	0.366335	-0.453581	-0.885963	-0.915234	-0.0725508	-0.596939	-0.93202	0.0534618	-0.914847	0.322181	-0.181638	1.82524	2.0315	-0.203284	-0.00761512	-0.921706	0.231572	-0.916278	0.707472	0.0504119	0.0483392	-0.28589	1.2593	0.394197	-0.6267	0.467422	-0.476688	0.372092	-0.138003	0.864167	0.0193833	173713	2	0.86032	1.16514	1.59528	0.413239	0.649616	0.558322	1.002	0.0314999	0.0563306	0.0481361	0.338274	0.391407	0.137937	Q6NZF1	Q6NZF1	Zinc finger CCCH domain-containing protein 11A
0.246515	-0.212726	0.159576	1.22847	0.502286	-0.0233101	0.199595	0.332228	0.134117	0.736089	0.11246	-0.226605	-0.162271	-0.5561	-0.0266243	-0.0427843	0.421759	0.623769	0.254118	-0.77943	1.03276	-0.180309	-0.217034	-0.597503	-0.755051	-0.429479	-0.603689	0.603066	-0.668701	-0.047833	-0.679577	-0.377775	51299.8	4	1.54262	0.921393	-0.41759	0.790837	-0.738522	0.634859	-0.518543	1.37149	-0.839475	0.048356	0.0220148	0.571174	0.0286669	Q8R180	Q8R180	ERO1-like protein alpha
-0.0224033	-0.700071	-0.494544	0.0132954	0.344991	-0.662117	0.364103	-0.13134	0.00317102	0.00713242	0.502477	0.0378849	1.24358	0.102551	0.157296	-0.449488	-0.384163	-0.697708	0.246961	-0.218211	-0.617547	0.0267137	0.27987	0.416844	-0.259641	-0.26187	0.306777	-0.159402	-0.0245193	0.249384	0.849644	-0.0696553	18046.8	2	0.616437	NaN	0	NaN	0	NaN	0	NaN	0	0.0484919	0.93984	0.681009	0.241859	Q9D711	Q9D711	Pirin
-0.154409	0.0662267	-0.621282	-0.807847	-0.575953	-0.489768	-0.670205	-0.0898538	0.362733	-0.729566	0.060718	-0.0877179	0.255386	0.66638	-0.453285	-0.017622	-0.614138	0.0670601	-0.487165	1.36841	-0.47655	-0.314395	-0.0858151	1.20736	0.721223	-0.579324	1.25061	0.316069	0.841253	-0.215526	0.164527	0.122469	299589	10	1.27401	1.13935	0.819387	0.471773	0.435367	0.999892	0.801166	0.495686	0.417146	0.0485722	0.0550162	0.533056	0.0532093	Q61941	Q61941	NAD(P) transhydrogenase, mitochondrial
-0.497937	0.825787	-0.0544041	-0.0361626	0.516378	0.0191343	0.52443	-0.168588	0.138834	-0.590463	-0.143033	-0.128284	-0.372863	-0.176091	-0.57837	0.145296	0.0283744	-0.543283	0.19335	0.540798	0.337506	0.0439883	-0.120544	0.715229	-0.550177	0.207789	0.681609	-0.461715	0.306498	-0.27644	-0.152671	-0.373973	15650.9	2	0.647371	NaN	0	NaN	0	NaN	0	NaN	0	0.0487342	0.635156	0.69853	0.225232	Q80ZI6	Q80ZI6	E3 ubiquitin-protein ligase LRSAM1
-0.81879	9.11577	-0.672784	-0.600615	-0.81896	-0.81135	-0.640192	-0.645932	-0.868211	-0.892635	-0.643149	-0.795986	-0.679272	-0.817178	-0.783293	-0.725284	-0.808567	-0.513613	-0.743219	-0.615405	-0.790394	-0.621991	-0.664683	12.8215	-0.51282	-0.748328	-0.763305	-0.90226	-0.756487	-0.661497	-0.733603	-0.88743	52462.6	2	0.603415	0.766613	-1.0224	0.786616	-1.11395	0.0801098	0.211973	NaN	0	0.0488441	0.751002	0.930299	0.249221	Q6PHS9	Q6PHS9	Voltage-dependent calcium channel subunit alpha-2/delta-2;Voltage-dependent calcium channel subunit alpha-2-2;Voltage-dependent calcium channel subunit delta-2
0.321735	0.112998	-0.840966	-0.798223	-0.128417	-0.167903	-0.388902	-0.0991687	-0.197442	-0.466265	0.00102109	0.11247	0.562138	0.611749	-0.115969	-0.204918	-0.915937	-0.0110297	-0.854152	0.938446	-0.156486	0.133494	-0.337831	0.712731	0.123027	-0.539539	0.964395	0.36862	0.616149	-0.169064	0.276873	0.536366	113684	2	0.624651	0.838378	0.685643	0.757604	0.895872	0.0269832	0.0544267	0.40704	0.264657	0.0489198	0.681023	0.786338	0.237328	Q9D554	Q9D554	Splicing factor 3A subunit 3
-0.207019	0.227329	-0.665075	-0.699243	-0.155114	-0.617534	0.0748124	-0.432945	-0.50724	0.188479	1.10911	0.459079	0.35706	0.14147	0.0792207	0.576458	0.656685	0.270337	0.0619484	0.741967	-0.648535	-0.473439	-0.782631	-0.0201982	-0.362735	0.568842	-0.160426	0.537961	-0.249113	-0.640238	0.71195	-0.141225	31249.2	3	0.856316	1.87153	0.99281	0.185245	0.217542	0.351648	0.373814	0.572172	-0.401454	0.0494165	0.96292	0.198958	0.139214	Q9D0L4	Q9D0L4	Uncharacterized aarF domain-containing protein kinase 1
-0.513715	0.0968933	0.15566	1.6405	0.105339	0.804879	-0.654839	-0.206913	-0.465164	0.363978	-0.3258	-0.28221	-0.405744	-0.703865	-0.64233	-0.0595233	0.199338	0.128801	0.195523	0.0135647	0.5767	-0.518007	0.27304	0.340776	-0.576279	0.991408	-0.22967	1.5643	-0.654184	-0.71755	-0.520986	0.0260718	21234.2	2	0.651095	0.889257	-0.676323	0.67169	-0.591618	0.163327	0.157417	0.203772	0.242123	0.0495003	0.522909	0.891881	0.223308	O08807	O08807	Peroxiredoxin-4
0.0764577	-0.0401679	0.0847237	0.183225	0.239503	0.187867	0.107489	-0.0567642	0.201921	-0.0896403	0.0217694	-0.033682	0.083007	-0.135489	0.00370925	-0.1222	0.102338	0.0263482	0.395489	0.42207	-0.341077	-0.0237611	-0.0208359	-0.183818	-0.153294	0.108442	-0.521152	-0.351696	-0.251415	0.116201	0.00180155	-0.0373696	157257	17	1.0562	1.15788	-0.149315	0.768675	-0.287199	0.323037	-0.102674	0.808561	-0.240558	0.0496201	0.117843	0.522141	0.0878619	Q7TMY8	Q7TMY8	E3 ubiquitin-protein ligase HUWE1
[truncated: 2 more columns]

## Sheet: C1
Protein IDs	protein names	gene name
Q80X85	28S ribosomal protein S7, mitochondrial	Mrps7
Q8K010	5-oxoprolinase	Oplah
Q8K2Z8	Ubiquitin-conjugating enzyme E2 Q2	Ube2q2
Q9ER88	28S ribosomal protein S29, mitochondrial	Dap3
Q9DCS2	Methyltransferase-like 26	Mettl26
P54731	FAS-associated factor 1	Faf1
Q91Y86	Mitogen-activated protein kinase 8	Mapk8
O08992	Syntenin-1	Sdcbp
Q5DTM8	E3 ubiquitin-protein ligase BRE1A	Rnf20
Q8BXJ8	Zinc finger protein 385B	Znf385b
O08989	Ras-related protein M-Ras	Mras
Q9D1H6	NADH dehydrogenase [ubiquinone] 1 alpha subcomplex assembly factor 4	Ndufaf4
Q99M01	Phenylalanine--tRNA ligase, mitochondrial	Fars2
Q921E2	Ras-related protein Rab-31	Rab31
O70166	Stathmin-3	Stmn3
P47963	60S ribosomal protein L13	Rpl13
Q9D958	Signal peptidase complex subunit 1	Spcs1
Q80W22	Threonine synthase-like 2	Thnsl2
P05214	Tubulin alpha-3 chain	Tuba3a
		Tuba3b
Q9JJZ2	Tubulin alpha-8 chain	Tuba8
Q6PDH0	Pleckstrin homology-like domain family B member 1	Phldb1
Q9EP96	Solute carrier organic anion transporter family member 1A4	Slco1a4
L7N264	Solute carrier organic anion transporter family member	Gm5724
Q9QXZ6	Solute carrier organic anion transporter family member 1A1	Slco1a1
Q99J94	Solute carrier organic anion transporter family member 1A6	Slco1a6

## Sheet: C1-terms
GO ID	GO description	cluster frequency	genes
44464	cell part	19/25 76.0%	P05214 O70166 Q8BXJ8 Q921E2 Q9D0L4 Q80X85 Q9ER88 Q99M01 Q9EP96 P50543 O08989 Q9D6F4 O08992 Q9D1H6 Q80ZI6 Q9D958 Q8K2Z8 Q5DTM8 Q91Y86
5623	cell	19/25 76.0%	P05214 O70166 Q8BXJ8 Q921E2 Q9D0L4 Q80X85 Q9ER88 Q99M01 Q9EP96 P50543 O08989 Q9D6F4 O08992 Q9D1H6 Q80ZI6 Q9D958 Q8K2Z8 Q5DTM8 Q91Y86
5488	binding	17/25 68.0%	O70166 Q8BXJ8 Q921E2 Q9D0L4 Q80W22 Q99M01 O55091 P50543 O08989 O08992 Q9D1H6 Q80ZI6 Q8K010 Q9D958 Q8K2Z8 Q5DTM8 Q91Y86
3824	catalytic activity	10/25 40.0%	Q9D0L4 Q80W22 Q80ZI6 Q99M01 Q8K010 Q9D958 Q8K2Z8 Q5DTM8 Q91Y86 O08989
32555	purine ribonucleotide binding	7/25 28.0%	Q921E2 Q9D0L4 Q99M01 Q8K010 Q8K2Z8 Q91Y86 O08989
32553	ribonucleotide binding	7/25 28.0%	Q921E2 Q9D0L4 Q99M01 Q8K010 Q8K2Z8 Q91Y86 O08989
17076	purine nucleotide binding	7/25 28.0%	Q921E2 Q9D0L4 Q99M01 Q8K010 Q8K2Z8 Q91Y86 O08989
166	nucleotide binding	7/25 28.0%	Q921E2 Q9D0L4 Q99M01 Q8K010 Q8K2Z8 Q91Y86 O08989
5739	mitochondrion	6/25 24.0%	Q9D0L4 Q80X85 Q9D1H6 Q9ER88 Q99M01 Q91Y86
44267	cellular protein metabolic process	6/25 24.0%	Q9D0L4 Q80X85 Q99M01 Q9D958 Q8K2Z8 Q91Y86
23034	intracellular signaling pathway	5/25 20.0%	O70166 O08992 Q921E2 Q91Y86 O08989
16874	ligase activity	4/25 16.0%	Q80ZI6 Q99M01 Q8K2Z8 Q5DTM8
35556	intracellular signal transduction	4/25 16.0%	O08992 Q921E2 Q91Y86 O08989
7264	small GTPase mediated signal transduction	3/25 12.0%	O08992 Q921E2 O08989
6519	cellular amino acid and derivative metabolic process	3/25 12.0%	Q80W22 Q99M01 Q8K010
313	organellar ribosome	2/25 8.0%	Q80X85 Q9ER88
5761	mitochondrial ribosome	2/25 8.0%	Q80X85 Q9ER88
15935	small ribosomal subunit	2/25 8.0%	Q80X85 Q9ER88
6518	peptide metabolic process	2/25 8.0%	Q8K010 Q9D958
33279	ribosomal subunit	2/25 8.0%	Q80X85 Q9ER88
31980	mitochondrial lumen	2/25 8.0%	Q80X85 Q9ER88
5759	mitochondrial matrix	2/25 8.0%	Q80X85 Q9ER88
51493	regulation of cytoskeleton organization	2/25 8.0%	O70166 Q91Y86

## Sheet: C2
Protein IDs	protein names	gene name
Q8VDU5	SNF-related serine/threonine-protei...	Snrk
Q8BTG7	Protein NDRG4	Ndrg4
Q80U57	Regulating synaptic membrane exocyt...	Rims3
Q9D2V7	Coronin-7	Coro7
Q99NF2	NMDA receptor synaptonuclear signal...	Nsmf
Q6PA06	Atlastin-2	Atl2
Q6P1I6	PH and SEC7 domain-containing protein 2	Psd2
Q8BTV2	Cleavage and polyadenylation specificity factor subunit 7	Cpsf7
Q60715	Prolyl 4-hydroxylase subunit alpha-1	P4ha1
Q99J39	Malonyl-CoA decarboxylase, mitochondrial	Mlycd
Q3UH45	Tectonin beta-propeller repeat-containing 2	Tecpr2
O55135	Eukaryotic translation initiation factor 6	Eif6
Q3TVI8	Pre-B-cell leukemia transcription factor-interacting protein 1	Pbxip1
O70493	Sorting nexin-12	Snx12
A2BDX3	Adenylyltransferase and sulfurtransferase MOCS3	Mocs3
Q6VNS1	NT-3 growth factor receptor	Ntrk3
P84244	Histone H3.3	H3-3a
		H3-3b
P68433	Histone H3.1	H3c1
		H3c8
		H3c10
		H3c11
P02301	Histone H3.3C	H3-5
P84228	Histone H3.2	H3c2
		H3c3
		H3c4
		H3c6
		H3c7
		H3c13
		more..
P50586	Tubby protein	Tub
Q9WVR4	Fragile X mental retardation syndrome-related protein 2	Fxr2
Q9JHR9	Nuclear receptor-interacting protein 2	Nrip2
Q9WVL5	MORC family CW-type zinc finger protein 1	Morc1
P29699	Alpha-2-HS-glycoprotein	Ahsg

## Sheet: C2-terms
GO ID	GO description	cluster frequency	genes
44464	cell part	22/26 84.6%	Q8VDU5 Q2TBE6 Q8K224 P84309 Q6VNS1 P48453 A2BDX3 O08807 Q6P1I6 Q99J39 Q80U57 Q9D2V7 P50586 Q8R180 Q9JHR9 Q9WVL5 O55135 P84244 Q60715 Q8BTV2 Q3TVI8 Q99NF2
5623	cell	22/26 84.6%	Q8VDU5 Q2TBE6 Q8K224 P84309 Q6VNS1 P48453 A2BDX3 O08807 Q6P1I6 Q99J39 Q80U57 Q9D2V7 P50586 Q8R180 Q9JHR9 Q9WVL5 O55135 P84244 Q60715 Q8BTV2 Q3TVI8 Q99NF2
5622	intracellular	20/26 76.9%	Q8VDU5 Q2TBE6 Q8K224 P84309 Q6VNS1 A2BDX3 O08807 Q6P1I6 Q99J39 Q9D2V7 P50586 Q8R180 Q9JHR9 Q9WVL5 O55135 P84244 Q60715 Q8BTV2 Q3TVI8 Q99NF2
44424	intracellular part	19/26 73.0%	Q8VDU5 Q2TBE6 Q8K224 P84309 Q6VNS1 A2BDX3 O08807 Q99J39 Q9D2V7 P50586 Q8R180 Q9JHR9 Q9WVL5 O55135 P84244 Q60715 Q8BTV2 Q3TVI8 Q99NF2
43231	intracellular membrane-bounded organelle	16/26 61.5%	Q8VDU5 Q2TBE6 Q8K224 P84309 O08807 Q99J39 Q9D2V7 Q8R180 Q9JHR9 Q9WVL5 O55135 P84244 Q60715 Q8BTV2 Q3TVI8 Q99NF2
43227	membrane-bounded organelle	16/26 61.5%	Q8VDU5 Q2TBE6 Q8K224 P84309 O08807 Q99J39 Q9D2V7 Q8R180 Q9JHR9 Q9WVL5 O55135 P84244 Q60715 Q8BTV2 Q3TVI8 Q99NF2
43229	intracellular organelle	16/26 61.5%	Q8VDU5 Q2TBE6 Q8K224 P84309 O08807 Q99J39 Q9D2V7 Q8R180 Q9JHR9 Q9WVL5 O55135 P84244 Q60715 Q8BTV2 Q3TVI8 Q99NF2
43226	organelle	16/26 61.5%	Q8VDU5 Q2TBE6 Q8K224 P84309 O08807 Q99J39 Q9D2V7 Q8R180 Q9JHR9 Q9WVL5 O55135 P84244 Q60715 Q8BTV2 Q3TVI8 Q99NF2
9987	cellular process	16/26 61.5%	Q8VDU5 Q2TBE6 P84309 Q6VNS1 P48453 A2BDX3 O08807 Q99J39 Q80U57 P50586 Q8R180 Q9JHR9 Q9WVL5 O55135 Q60715 Q8BTV2
8152	metabolic process	14/26 53.8%	Q8VDU5 Q2TBE6 Q8K224 P84309 Q6VNS1 P48453 A2BDX3 O08807 Q99J39 Q8R180 Q9JHR9 O55135 Q60715 Q8BTV2
3824	catalytic activity	12/26 46.1%	Q8VDU5 Q2TBE6 Q8K224 P84309 Q6VNS1 Q9JHR9 P48453 A2BDX3 O08807 Q60715 Q99J39 Q8R180
44237	cellular metabolic process	12/26 46.1%	Q8VDU5 Q2TBE6 P84309 Q6VNS1 Q9JHR9 P48453 A2BDX3 O55135 Q60715 Q8BTV2 Q99J39 Q8R180
44238	primary metabolic process	12/26 46.1%	Q8VDU5 Q2TBE6 P84309 Q6VNS1 Q9JHR9 P48453 A2BDX3 O55135 Q60715 Q8BTV2 Q99J39 Q8R180
166	nucleotide binding	9/26 34.6%	Q8VDU5 Q2TBE6 Q8K224 P84309 Q6VNS1 Q9WVL5 A2BDX3 Q8BTV2 Q8R180
44260	cellular macromolecule metabolic process	9/26 34.6%	Q8VDU5 Q6VNS1 Q9JHR9 P48453 A2BDX3 O55135 Q60715 Q8BTV2 Q8R180
30554	adenyl nucleotide binding	8/26 30.7%	Q8VDU5 Q2TBE6 Q8K224 P84309 Q6VNS1 Q9WVL5 A2BDX3 Q8R180
1883	purine nucleoside binding	8/26 30.7%	Q8VDU5 Q2TBE6 Q8K224 P84309 Q6VNS1 Q9WVL5 A2BDX3 Q8R180
1882	nucleoside binding	8/26 30.7%	Q8VDU5 Q2TBE6 Q8K224 P84309 Q6VNS1 Q9WVL5 A2BDX3 Q8R180
17076	purine nucleotide binding	8/26 30.7%	Q8VDU5 Q2TBE6 Q8K224 P84309 Q6VNS1 Q9WVL5 A2BDX3 Q8R180
19538	protein metabolic process	8/26 30.7%	Q8VDU5 Q6VNS1 Q9JHR9 P48453 A2BDX3 O55135 Q60715 Q8R180
5524	ATP binding	7/26 26.9%	Q8VDU5 Q2TBE6 Q8K224 P84309 Q6VNS1 Q9WVL5 A2BDX3
32559	adenyl ribonucleotide binding	7/26 26.9%	Q8VDU5 Q2TBE6 Q8K224 P84309 Q6VNS1 Q9WVL5 A2BDX3
44267	cellular protein metabolic process	7/26 26.9%	Q8VDU5 Q6VNS1 P48453 A2BDX3 O55135 Q60715 Q8R180
32555	purine ribonucleotide binding	7/26 26.9%	Q8VDU5 Q2TBE6 Q8K224 P84309 Q6VNS1 Q9WVL5 A2BDX3
32553	ribonucleotide binding	7/26 26.9%	Q8VDU5 Q2TBE6 Q8K224 P84309 Q6VNS1 Q9WVL5 A2BDX3
5626	insoluble fraction	5/26 19.2%	Q2TBE6 P84309 Q6VNS1 P48453 Q9D2V7
267	cell fraction	5/26 19.2%	Q2TBE6 P84309 Q6VNS1 P48453 Q9D2V7
6464	protein modification process	5/26 19.2%	Q8VDU5 Q6VNS1 P48453 Q60715 Q8R180
43412	macromolecule modification	5/26 19.2%	Q8VDU5 Q6VNS1 P48453 Q60715 Q8R180
5624	membrane fraction	4/26 15.3%	Q2TBE6 P84309 Q6VNS1 Q9D2V7
46483	heterocycle metabolic process	3/26 11.5%	P84309 A2BDX3 Q60715
48583	regulation of response to stimulus	3/26 11.5%	P29699 Q6VNS1 P48453
9108	coenzyme biosynthetic process	2/26 7.6%	A2BDX3 Q99J39
30258	lipid modification	2/26 7.6%	Q2TBE6 Q99J39
51188	cofactor biosynthetic process	2/26 7.6%	A2BDX3 Q99J39
48585	negative regulation of response to stimulus	2/26 7.6%	P29699 P48453
6887	exocytosis	2/26 7.6%	Q2TBE6 Q80U57
16705	oxidoreductase activity, acting on paired donors, with incorporation or reduction of molecular oxygen	2/26 7.6%	O08807 Q60715

## Sheet: C3
Protein IDs	protein names	gene name
O35857	Mitochondrial import inner membrane translocase subunit TIM44	Timm44
Q9WTX5	S-phase kinase-associated protein 1	Skp1
Q62420	Endophilin-A1	Sh3gl2
Q9D394	Protein RUFY3	Rufy3
Q63850	Nuclear pore glycoprotein p62	Nup62
P09671	Superoxide dismutase [Mn], mitochondrial	Sod2
Q8BVQ5	Protein phosphatase methylesterase 1	Ppme1
P05202	Aspartate aminotransferase, mitochondrial	Got2
Q01768	Nucleoside diphosphate kinase B	Nme2
Q6PHZ8	Kv channel-interacting protein 4	Kcnip4
Q9DAW9	Calponin-3	Cnn3
Q08093	Calponin-2	Cnn2
Q922R8	Protein disulfide-isomerase A6	Pdia6
Q9Z2I0	Mitochondrial proton/calcium exchanger protein	Letm1
Q8BTX9	Inactive hydroxysteroid dehydrogenase-like protein 1	Hsdl1
Q9CR51	V-type proton ATPase subunit G 1	Atp6v1g1
A2AGT5	Cytoskeleton-associated protein 5	Ckap5
Q8K394	Inactive phospholipase C-like protein 2	Plcl2
Q9D892	Inosine triphosphate pyrophosphatase	Itpa
Q8CIN4	Serine/threonine-protein kinase PAK2	Pak2
Q8CI43	Myosin light chain 6B	Myl6b
P15208	Insulin receptor	Insr
Q9R0B7	Zinc finger protein 346	Znf346
Q9D0I9	Arginine--tRNA ligase, cytoplasmic	Rars1
P17225	Polypyrimidine tract-binding protein 1	Ptbp1

## Sheet: C3-terms
GO ID	GO description	cluster frequency	genes
44464	cell part	21/23 91.3%	Q8CI43 Q9Z2I0 Q9WTX5 Q9CR51 P15208 Q9D394 Q62420 Q63850 Q6PHZ8 Q9D892 A2AGT5 Q01768 P09671 Q8BTX9 O88545 Q8K394 Q9R0B7 Q9DAW9 Q922R8 P05202 Q9D0I9
5623	cell	21/23 91.3%	Q8CI43 Q9Z2I0 Q9WTX5 Q9CR51 P15208 Q9D394 Q62420 Q63850 Q6PHZ8 Q9D892 A2AGT5 Q01768 P09671 Q8BTX9 O88545 Q8K394 Q9R0B7 Q9DAW9 Q922R8 P05202 Q9D0I9
44424	intracellular part	19/23 82.6%	Q8CI43 Q9Z2I0 Q9WTX5 Q9CR51 P15208 Q62420 Q63850 Q9D892 A2AGT5 Q01768 P09671 Q8BTX9 O88545 Q8K394 Q9R0B7 Q9DAW9 Q922R8 P05202 Q9D0I9
5622	intracellular	19/23 82.6%	Q8CI43 Q9Z2I0 Q9WTX5 Q9CR51 P15208 Q62420 Q63850 Q9D892 A2AGT5 Q01768 P09671 Q8BTX9 O88545 Q8K394 Q9R0B7 Q9DAW9 Q922R8 P05202 Q9D0I9
5488	binding	19/23 82.6%	Q8CI43 Q9WTX5 Q9CR51 P15208 Q9D394 Q62420 Q63850 Q6PHZ8 Q9D892 A2AGT5 Q01768 P09671 Q8BTX9 O88545 Q8K394 Q9R0B7 Q9DAW9 P05202 Q9D0I9
9987	cellular process	17/23 73.9%	Q8CI43 Q9WTX5 Q9CR51 P15208 Q9D394 Q62420 Q63850 Q9D892 A2AGT5 Q01768 P09671 Q9R0B7 Q9DAW9 Q922R8 Q8CIN4 P05202 Q9D0I9
5737	cytoplasm	16/23 69.5%	Q9Z2I0 Q9CR51 P15208 Q62420 Q63850 Q9D892 A2AGT5 Q01768 P09671 Q8BTX9 O88545 Q8K394 Q9R0B7 Q922R8 P05202 Q9D0I9
43229	intracellular organelle	15/23 65.2%	Q8CI43 Q9Z2I0 Q9CR51 P15208 Q63850 A2AGT5 Q01768 P09671 Q8BTX9 O88545 Q9R0B7 Q9DAW9 Q922R8 P05202 Q9D0I9
43226	organelle	15/23 65.2%	Q8CI43 Q9Z2I0 Q9CR51 P15208 Q63850 A2AGT5 Q01768 P09671 Q8BTX9 O88545 Q9R0B7 Q9DAW9 Q922R8 P05202 Q9D0I9
3824	catalytic activity	14/23 60.8%	Q8CI43 Q9WTX5 Q9CR51 P15208 Q9D892 Q01768 Q8BVQ5 P09671 Q8BTX9 Q8K394 Q922R8 Q8CIN4 P05202 Q9D0I9
5515	protein binding	13/23 56.5%	Q9WTX5 Q9CR51 P15208 Q9D394 Q62420 Q63850 A2AGT5 Q01768 P09671 O88545 Q9R0B7 Q9DAW9 P05202
8152	metabolic process	12/23 52.1%	Q8CI43 Q01768 P09671 Q9WTX5 Q8BTX9 Q9CR51 P15208 Q8K394 Q9D892 Q8CIN4 P05202 Q9D0I9
43231	intracellular membrane-bounded organelle	12/23 52.1%	Q9Z2I0 Q01768 P09671 Q8BTX9 Q9CR51 P15208 O88545 Q9R0B7 Q63850 Q922R8 P05202 Q9D0I9
43227	membrane-bounded organelle	12/23 52.1%	Q9Z2I0 Q01768 P09671 Q8BTX9 Q9CR51 P15208 O88545 Q9R0B7 Q63850 Q922R8 P05202 Q9D0I9
44446	intracellular organelle part	10/23 43.4%	Q8CI43 Q9Z2I0 P09671 Q9CR51 O88545 Q9R0B7 Q63850 Q9DAW9 Q922R8 P05202
44422	organelle part	10/23 43.4%	Q8CI43 Q9Z2I0 P09671 Q9CR51 O88545 Q9R0B7 Q63850 Q9DAW9 Q922R8 P05202
44238	primary metabolic process	10/23 43.4%	Q01768 P09671 Q9WTX5 Q9CR51 P15208 Q8K394 Q9D892 Q8CIN4 P05202 Q9D0I9
44444	cytoplasmic part	9/23 39.1%	Q9Z2I0 Q01768 P09671 Q8BTX9 Q9CR51 P15208 Q922R8 P05202 Q9D0I9
46872	metal ion binding	8/23 34.7%	Q8CI43 Q01768 P09671 P15208 Q8K394 Q9R0B7 Q6PHZ8 Q9D892
43169	cation binding	8/23 34.7%	Q8CI43 Q01768 P09671 P15208 Q8K394 Q9R0B7 Q6PHZ8 Q9D892
43167	ion binding	8/23 34.7%	Q8CI43 Q01768 P09671 P15208 Q8K394 Q9R0B7 Q6PHZ8 Q9D892
43234	protein complex	7/23 30.4%	Q8CI43 Q9WTX5 Q9CR51 O88545 Q63850 P05202 Q9D0I9
6810	transport	7/23 30.4%	Q8CI43 A2AGT5 Q9CR51 Q62420 Q63850 Q6PHZ8 P05202
51234	establishment of localization	7/23 30.4%	Q8CI43 A2AGT5 Q9CR51 Q62420 Q63850 Q6PHZ8 P05202
32991	macromolecular complex	7/23 30.4%	Q8CI43 Q9WTX5 Q9CR51 O88545 Q63850 P05202 Q9D0I9
51179	localization	7/23 30.4%	Q8CI43 A2AGT5 Q9CR51 Q62420 Q63850 Q6PHZ8 P05202
44281	small molecule metabolic process	6/23 26.0%	Q01768 P09671 Q9CR51 Q9D892 P05202 Q9D0I9
5739	mitochondrion	6/23 26.0%	Q9Z2I0 Q01768 P09671 Q8BTX9 P05202 Q9D0I9
43228	non-membrane-bounded organelle	6/23 26.0%	Q8CI43 A2AGT5 P09671 Q9R0B7 Q63850 Q9DAW9
43232	intracellular non-membrane-bounded organelle	6/23 26.0%	Q8CI43 A2AGT5 P09671 Q9R0B7 Q63850 Q9DAW9
48523	negative regulation of cellular process	5/23 21.7%	Q01768 P09671 P15208 Q9D394 Q63850
48519	negative regulation of biological process	5/23 21.7%	Q01768 P09671 P15208 Q9D394 Q63850
16740	transferase activity	5/23 21.7%	Q01768 Q9WTX5 P15208 Q8CIN4 P05202
31967	organelle envelope	4/23 17.3%	Q9Z2I0 P09671 Q63850 P05202
31975	envelope	4/23 17.3%	Q9Z2I0 P09671 Q63850 P05202
31090	organelle membrane	4/23 17.3%	Q9Z2I0 P09671 Q9CR51 P05202
16301	kinase activity	4/23 17.3%	Q01768 Q9WTX5 P15208 Q8CIN4
16772	transferase activity, transferring phosphorus-containing groups	4/23 17.3%	Q01768 Q9WTX5 P15208 Q8CIN4
5856	cytoskeleton	4/23 17.3%	Q8CI43 A2AGT5 Q63850 Q9DAW9
31406	carboxylic acid binding	3/23 13.0%	P15208 P05202 Q9D0I9
45596	negative regulation of cell differentiation	3/23 13.0%	Q01768 P09671 Q9D394
51093	negative regulation of developmental process	3/23 13.0%	Q01768 P09671 Q9D394
43025	neuronal cell body	3/23 13.0%	Q9DAW9 Q6PHZ8 P05202
44297	cell body	3/23 13.0%	Q9DAW9 Q6PHZ8 P05202
5743	mitochondrial inner membrane	3/23 13.0%	Q9Z2I0 P09671 P05202
6519	cellular amino acid and derivative metabolic process	3/23 13.0%	P09671 P05202 Q9D0I9
19866	organelle inner membrane	3/23 13.0%	Q9Z2I0 P09671 P05202
6753	nucleoside phosphate metabolic process	3/23 13.0%	Q01768 Q9CR51 Q9D892
9117	nucleotide metabolic process	3/23 13.0%	Q01768 Q9CR51 Q9D892
31966	mitochondrial membrane	3/23 13.0%	Q9Z2I0 P09671 P05202
55086	nucleobase, nucleoside and nucleotide metabolic process	3/23 13.0%	Q01768 Q9CR51 Q9D892
5740	mitochondrial envelope	3/23 13.0%	Q9Z2I0 P09671 P05202
5509	calcium ion binding	3/23 13.0%	Q8CI43 Q8K394 Q6PHZ8
44429	mitochondrial part	3/23 13.0%	Q9Z2I0 P09671 P05202
43005	neuron projection	3/23 13.0%	Q9D394 Q9DAW9 Q6PHZ8
45595	regulation of cell differentiation	3/23 13.0%	Q01768 P09671 Q9D394
16462	pyrophosphatase activity	3/23 13.0%	Q8CI43 Q9CR51 Q9D892
16818	hydrolase activity, acting on acid anhydrides, in phosphorus-containing anhydrides	3/23 13.0%	Q8CI43 Q9CR51 Q9D892
16817	hydrolase activity, acting on acid anhydrides	3/23 13.0%	Q8CI43 Q9CR51 Q9D892
8017	microtubule binding	2/23 8.6%	A2AGT5 Q9DAW9
16597	amino acid binding	2/23 8.6%	P05202 Q9D0I9
7568	aging	2/23 8.6%	P09671 Q63850
51236	establishment of RNA localization	2/23 8.6%	A2AGT5 Q63850
50657	nucleic acid transport	2/23 8.6%	A2AGT5 Q63850
50658	RNA transport	2/23 8.6%	A2AGT5 Q63850
6403	RNA localization	2/23 8.6%	A2AGT5 Q63850
15631	tubulin binding	2/23 8.6%	A2AGT5 Q9DAW9
15931	nucleobase, nucleoside, nucleotide and nucleic acid transport	2/23 8.6%	A2AGT5 Q63850
46777	protein amino acid autophosphorylation	2/23 8.6%	P15208 Q8CIN4
43176	amine binding	2/23 8.6%	P05202 Q9D0I9
30029	actin filament-based process	2/23 8.6%	Q8CI43 Q9DAW9
51259	protein oligomerization	2/23 8.6%	P09671 P15208
6520	cellular amino acid metabolic process	2/23 8.6%	P05202 Q9D0I9
44092	negative regulation of molecular function	2/23 8.6%	P15208 Q63850
9205	purine ribonucleoside triphosphate metabolic process	2/23 8.6%	Q01768 Q9CR51
9199	ribonucleoside triphosphate metabolic process	2/23 8.6%	Q01768 Q9CR51
9144	purine nucleoside triphosphate metabolic process	2/23 8.6%	Q01768 Q9CR51

## Sheet: C4
Protein IDs	protein names	gene name
E9PZP8	HECT and RLD domain-containing E3 ubiquitin protein ligase family member 1	Herc1
P12849	cAMP-dependent protein kinase type I-beta regulatory subunit	Prkar1b
Q80VP0	Tectonin beta-propeller repeat-containing protein 1	Tecpr1
A2ALS5	Rap1 GTPase-activating protein 1	Rap1gap
Q9CQJ8	NADH dehydrogenase [ubiquinone] 1 beta subcomplex subunit 9	Ndufb9
Q8R151	NFX1-type zinc finger-containing protein 1	Znfx1
Q9R1V6	Disintegrin and metalloproteinase domain-containing protein 22	Adam22
O88485	Cytoplasmic dynein 1 intermediate chain 1	Dync1i1
P97355	Spermine synthase	Sms
Q62418	Drebrin-like protein	Dbnl
Q6PDG5	SWI/SNF complex subunit SMARCC2	Smarcc2
P28738	Kinesin heavy chain isoform 5C	Kif5c
P30999	Catenin delta-1	Ctnnd1
Q7TMY8	E3 ubiquitin-protein ligase HUWE1	Huwe1
Q61584	Fragile X mental retardation syndrome-related protein 1	Fxr1
P35290	Ras-related protein Rab-24	Rab24
Q5U430	E3 ubiquitin-protein ligase UBR3	Ubr3
Q04736	Tyrosine-protein kinase Yes	Yes1

## Sheet: C4-terms
GO ID	GO description	cluster frequency	genes
9987	cellular process	12/14 85.7%	Q04736 P12849 Q6PDG5 P97355 P30999 Q9R1V6 Q62418 Q7TMY8 O88485 P35290 Q61584 Q9CQJ8
44464	cell part	12/14 85.7%	Q04736 P12849 Q6PDG5 P30999 Q9R1V6 Q62418 Q7TMY8 Q80VP0 O88485 P35290 Q61584 Q9CQJ8
5623	cell	12/14 85.7%	Q04736 P12849 Q6PDG5 P30999 Q9R1V6 Q62418 Q7TMY8 Q80VP0 O88485 P35290 Q61584 Q9CQJ8
5488	binding	11/14 78.5%	Q04736 P12849 Q8R151 Q6PDG5 P30999 Q9R1V6 Q62418 Q7TMY8 O88485 P35290 Q61584
8152	metabolic process	10/14 71.4%	Q04736 P12849 Q6PDG5 P97355 P30999 Q9R1V6 Q7TMY8 O88485 P35290 Q9CQJ8
44424	intracellular part	10/14 71.4%	Q04736 P12849 Q6PDG5 P30999 Q62418 Q7TMY8 O88485 P35290 Q61584 Q9CQJ8
5622	intracellular	10/14 71.4%	Q04736 P12849 Q6PDG5 P30999 Q62418 Q7TMY8 O88485 P35290 Q61584 Q9CQJ8
5737	cytoplasm	9/14 64.2%	Q04736 P12849 P30999 Q62418 Q7TMY8 O88485 P35290 Q61584 Q9CQJ8
44237	cellular metabolic process	8/14 57.1%	Q04736 P12849 Q6PDG5 P97355 P30999 Q7TMY8 P35290 Q9CQJ8
32502	developmental process	6/14 42.8%	P12849 Q6PDG5 P30999 Q9R1V6 Q7TMY8 Q61584
48731	system development	5/14 35.7%	P12849 Q6PDG5 P30999 Q9R1V6 Q61584
6810	transport	5/14 35.7%	Q04736 Q62418 O88485 P35290 Q9CQJ8
51234	establishment of localization	5/14 35.7%	Q04736 Q62418 O88485 P35290 Q9CQJ8
48856	anatomical structure development	5/14 35.7%	P12849 Q6PDG5 P30999 Q9R1V6 Q61584
51179	localization	5/14 35.7%	Q04736 Q62418 O88485 P35290 Q9CQJ8
7275	multicellular organismal development	5/14 35.7%	P12849 Q6PDG5 P30999 Q9R1V6 Q61584
44422	organelle part	5/14 35.7%	Q6PDG5 Q62418 O88485 Q61584 Q9CQJ8
5626	insoluble fraction	3/14 21.4%	Q04736 P12849 P30999
30027	lamellipodium	2/14 14.2%	P30999 Q62418
31252	cell leading edge	2/14 14.2%	P30999 Q62418
7264	small GTPase mediated signal transduction	2/14 14.2%	Q62418 P35290
30425	dendrite	2/14 14.2%	P30999 Q62418

## Sheet: C5
Protein IDs	protein names	gene name
O55042	Alpha-synuclein	Snca
P29595	NEDD8	Nedd8
Q9EQQ9	Protein O-GlcNAcase	Oga
Q7TNL5	Serine/threonine-protein phosphatase 2A 56 kDa regulatory subunit	Ppp2r5d
P19536	Cytochrome c oxidase subunit 5B, mitochondrial	Cox5b
Q9WUK2	Eukaryotic translation initiation factor 4H	Eif4h
Q9WUL7	ADP-ribosylation factor-like protein 3	Arl3
Q61941	NAD(P) transhydrogenase, mitochondrial	Nnt
Q9D554	Splicing factor 3A subunit 3	Sf3a3
Q0P5W1	Vacuolar protein sorting-associated protein 8 homolog	Vps8
Q08460	Calcium-activated potassium channel subunit alpha-1	Kcnma1
Q9JHU2	Palmdelphin	Palmd
Q9Z1X4	Interleukin enhancer-binding factor 3	Ilf3
Q8CI32	BAG family molecular chaperone regulator 5	Bag5
A2A8L5	Receptor-type tyrosine-protein phosphatase F	Ptprf
Q6NZF1	Zinc finger CCCH domain-containing protein 11A	Zc3h11a
Q91ZZ3	Beta-synuclein	Sncb
P00493	Hypoxanthine-guanine phosphoribosyltransferase	Hprt1

[truncated: 4 more sheets: GO-C5, C6, C7, C8]
