# Supplementary material for: Fish Hydrolysate Supplementation Prevents Stress-Induced Dysregulation of Hippocampal Proteins Relative to Mitochondrial Metabolism and the Neuronal Network in Mice
Source: Foods. 2022 May 28;11(11):1591. doi: 10.3390/foods11111591 (PMC9180483; doi:10.3390/foods11111591)
Supplement: Supplementary file 1 [file foods-11-01591-s001.zip › Table_S3_supplementation-proteins.xlsx]

## Sheet: proteins
C-NS_1	C-NS_1-1	C-NS_2	C-NS_3	C-NS_4	C-NS_4-1	C-NS_5	C-NS_5-1	C-S_19	C-S_20	C-S_21-1	C-S_22-1	C-S_23	C-S_24	C-S_24-1	C-S_25-1	FH-NS_10	FH-NS_11	FH-NS_11-1	FH-NS_12	FH-NS_13-1	FH-NS_14-1	FH-NS_7	FH-NS_9	FH-S_25	FH-S_27	FH-S_28	FH-S_29	FH-S_30	FH-S_31-1	FH-S_32-1	FH-S_34-1	moyenne	Unique peptides	#NAME?	-Log Student's T-test p-value C-S_C-NS	Student's T-test Difference C-S_C-NS	-Log Student's T-test p-value FH-S_FH-NS	Student's T-test Difference FH-S_FH-NS	-Log Student's T-test p-value FH-NS_C-NS	Student's T-test Difference FH-NS_C-NS	-Log Student's T-test p-value FH-S_C-S	Student's T-test Difference FH-S_C-S	Two-way ANOVA p value Group1_stress	Two-way ANOVA p value Group2_suppl	Two-way ANOVA p value Interaction	ANOVA p value	Protein IDs	Majority protein IDs	Protein names
0.509932	1.00457	0.0716622	0.0846489	-0.051471	-0.690517	-0.0462462	0.594796	0.802475	0.0978227	0.854197	0.424212	0.0424603	0.63913	1.17792	0.547774	-0.552394	-0.815599	-0.710463	-0.749607	-0.594525	-0.760757	-0.394616	-0.240135	0.426973	-0.849295	0.083604	0.663612	-0.723669	-0.263982	0.227188	-0.809706	53592.4	4	3.3944	0.941031	0.532504	0.724751	0.763448	2.96598	-1.56529	1.69538	-1.33435	0.051285	9.32803e-05	0.719431	0.000403277	Q9DCN2	Q9DCN2	NADH-cytochrome b5 reductase 3;NADH-cytochrome b5 reductase 3 membrane-bound form;NADH-cytochrome b5 reductase 3 soluble form
-0.680254	0.837147	-0.382249	-0.634159	-0.356136	-0.0122951	-0.550081	-0.641894	-0.707375	-0.45883	-0.425212	-0.535563	-0.321633	-0.468892	-0.696649	-0.651648	0.0436438	1.66949	-0.370007	-0.45463	-0.250239	3.33929	0.304255	0.0616032	-0.313181	-0.321579	-0.189589	2.79344	-0.139506	0.0387392	-0.405798	0.879796	23089.1	2	2.23541	0.549265	-0.384899	0.161789	-0.199022	1.33302	1.03854	2.3659	1.22442	0.335928	0.000727333	0.757605	0.0058156	Q9Z0V7	Q9Z0V7	Mitochondrial import inner membrane translocase subunit Tim17-B
-0.454521	-0.241838	-0.389576	-0.358978	-0.16016	-0.284935	-0.0976078	-0.612818	-0.468905	0.0692763	0.216159	-0.19953	-0.265287	-0.160384	-0.277832	-0.154683	-0.12728	-0.279501	0.851113	1.41807	-0.0956688	0.270933	0.416092	-0.215281	0.0499343	0.440555	0.204686	-0.224882	1.65296	-0.211032	-0.226508	-0.0825656	16472.7	2	2.01683	NaN	0	NaN	0	NaN	0	NaN	0	0.530738	0.00169666	0.25142	0.00961999	Q9D4V7	Q9D4V7	Rab-like protein 3
1.33452	0.692092	0.270461	-0.11086	-0.491067	-0.306074	-0.310134	0.845205	1.68114	0.0529213	1.28329	-0.0341695	-0.0378807	0.192615	-0.0860632	-0.389589	-0.141836	0.017728	0.426616	-0.370986	-0.401777	-0.600419	-0.54945	-0.522337	-0.638082	-0.299856	-0.249876	-0.483959	-0.615716	-0.418154	0.598393	-0.336692	27286.9	2	1.60902	0.126601	0.123787	0.115922	-0.0992543	1.15473	-0.704595	1.75017	-0.927637	0.961093	0.00281557	0.657957	0.0246028	Q8K3F6	Q8K3F6	Potassium voltage-gated channel subfamily KQT member 3
0.142585	0.0518274	0.0198397	0.151767	0.577243	-0.324236	0.276349	0.0911604	-0.197107	0.566835	0.136463	0.113965	0.0796819	0.0300935	0.892139	-0.100303	-0.142621	-0.0468899	0.343692	-0.138795	-0.411214	-0.072908	0.0822829	-0.452958	-0.399414	-0.076734	-0.138871	-0.305626	-0.577501	0.207936	-0.144994	-0.233686	130677	11	1.69058	0.135367	0.0656281	0.3761	-0.182853	1.0186	-0.34719	1.82613	-0.595672	0.688785	0.00296201	0.398283	0.0203903	Q9CQN1	Q9CQN1	Heat shock protein 75 kDa, mitochondrial
0.295412	0.489121	0.611977	0.126463	0.272734	0.0898847	-0.937972	0.99075	0.432777	0.139583	0.804382	0.135847	0.100745	0.398021	0.304491	1.24471	0.648858	-0.802287	0.0251986	-0.928828	-0.91646	-0.931919	0.00634452	-0.840951	0.639867	0.420481	-0.874497	-0.944613	-0.852772	0.361704	0.436469	-0.945526	230189	2	1.62981	0.474398	0.581438	0.170278	0.444029	1.25899	-1.84475	1.57152	-1.98216	0.396712	0.00330297	0.909006	0.0234525	P97783	P97783	Protein AF1q
-0.531148	-0.0177193	-0.393506	-0.140357	-0.266938	0.130922	-0.0733632	-0.326301	-0.235652	0.0334683	-0.306831	-0.189148	-0.260926	-0.136743	-0.427529	-0.366083	-0.423067	0.0297913	0.889978	0.0574578	-0.088849	-0.0792195	0.552706	1.64916	-0.171606	0.131827	0.571191	0.171496	0.04941	-0.427467	-0.202924	0.797969	17822.5	2	1.52107	0.07219	-0.0342083	0.248017	-0.182924	1.35034	0.630408	1.40737	0.481693	0.54649	0.00409753	0.679064	0.030125	Q91WL8	Q91WL8	WW domain-containing oxidoreductase
-0.50136	-0.379975	-0.346253	-0.513945	-0.523764	-0.0758959	-0.0782002	-0.418322	0.0452537	0.190155	-0.222335	-0.396444	-0.157946	-0.0651832	0.414417	-0.382733	-0.118024	0.227979	-0.0337816	0.762135	-0.397338	-0.182025	0.421847	1.72189	-0.244601	-0.233421	0.528283	0.413875	0.837825	-0.263894	0.163087	-0.191303	15808.9	2	2.02107	1.59919	0.514192	0.187002	-0.142971	2.22531	0.905701	0.490005	0.248538	0.3249	0.00421099	0.0869553	0.00952641	Q8VDS8	Q8VDS8	Syntaxin-18
0.271556	0.246853	0.777771	-0.811477	-0.318357	0.418427	-0.0615233	-0.413962	-0.224037	-0.181074	0.651934	0.0102726	1.01843	0.948221	-0.293814	-0.0423936	-0.975026	3.27928	-0.984938	0.663288	-0.0321861	1.21446	-0.939043	-0.893393	-0.120886	-0.972622	0.906842	-0.971112	-0.970373	-0.962112	0.745979	-0.984986	435962	2	1.54878	0.461317	0.414896	0.35848	-1.23756	0.710536	-1.61094	2.01806	-3.2634	0.612838	0.00518691	0.312778	0.0282629	Q9QUR8	Q9QUR8	Semaphorin-7A
0.102698	-0.489403	-0.614135	0.195022	0.195148	-0.0547992	-0.4795	-0.484303	0.268267	-0.588052	-0.291707	0.0476674	-0.342004	-0.363642	-0.326012	-0.0269661	-0.036201	0.776158	-0.259382	0.446987	0.0986892	0.371507	1.05771	0.235071	-0.170156	-0.356726	-0.150841	0.359693	1.26099	0.0604881	-0.303896	-0.138376	18121	2	1.57478	0.0670366	0.0544322	0.733129	-0.373326	1.84953	0.809956	0.727621	0.382198	0.4314	0.00583717	0.293376	0.0266208	Q9DCC4	Q9DCC4	Pyrroline-5-carboxylate reductase 3
-0.503423	-0.406237	-0.74823	-0.446163	-0.766952	-0.776592	-0.550679	0.790369	0.672565	-0.499418	-0.516707	-0.559325	0.0336315	-0.613273	-0.559633	-0.552884	1.58799	-0.570936	-0.510365	0.172151	0.183972	-0.572782	-0.515472	-0.410934	0.00548312	-0.0783695	0.0579736	5.24849	0.804003	-0.392282	0.126856	0.86717	30364.1	2	1.95051	0.394161	0.378352	1.06654	0.907866	0.795185	0.717447	1.83773	1.24696	0.0610009	0.00588332	0.428388	0.011207	Q8R105	Q8R105	Vacuolar protein sorting-associated protein 37C
-0.50304	-0.0321806	0.0739989	-0.425591	-0.203036	0.115465	-0.176048	-0.252052	-0.0608117	0.241211	-0.129734	0.0109919	-0.256288	0.0368406	-0.30778	-0.106479	-0.100125	0.0695115	-0.129259	0.236812	0.0368406	0.139609	0.777492	0.395588	-0.363051	0.071126	0.127941	0.31095	-0.0435788	0.24489	-0.0371172	0.236902	111415	11	1.59521	0.562656	0.198674	0.363223	-0.135819	1.84283	0.528014	0.651676	0.193521	0.797298	0.00595085	0.178526	0.0253973	Q3UYC0	Q3UYC0	Protein phosphatase 1H
-0.232408	-0.0621824	-0.0670103	-0.322202	-0.549558	-0.278286	-0.0809137	-0.457315	-0.653051	0.194829	-0.305756	0.650798	-0.220063	-0.490661	-0.395233	-0.525391	-0.242395	0.587893	-0.461916	0.343447	-0.556663	0.419963	1.08995	0.698327	0.0239901	0.344447	0.458267	-0.0682467	0.558073	0.42661	-0.465671	0.638334	23185.7	2	1.30739	0.0698091	-0.0557946	0.124134	0.113186	1.04623	0.589795	1.47574	0.758776	0.900838	0.00628365	0.714006	0.0492734	P02469	P02469	Laminin subunit beta-1
-0.470199	0.258058	-0.313371	-0.774944	-0.624303	0.438953	-0.574248	-0.19753	-0.587861	-0.0913105	-0.382936	0.633525	-0.416374	-0.39355	-0.55922	-0.147801	0.028192	0.76887	-0.0569306	0.308977	-0.344536	-0.303571	1.94445	0.215368	-0.395383	-0.157812	1.34388	0.850339	-0.511134	-0.0444947	0.0991983	0.457697	22300.2	2	1.3114	0.179498	0.174946	0.151754	-0.143732	1.45885	0.948862	1.00727	0.630184	0.954299	0.00675241	0.559679	0.04882	Q9JKS5	Q9JKS5	Intracellular hyaluronan-binding protein 4
-0.136841	-0.248721	-0.708663	-0.188806	-0.0694125	0.0356649	-0.135366	-0.0318455	-0.0583197	-0.400873	0.0210485	-0.175582	0.0791604	0.434172	-0.818988	-0.631615	0.557746	-0.0838925	-0.26342	0.31538	-0.103263	0.290299	0.0218135	0.0918373	-0.0279112	-0.0797398	1.10166	0.496246	0.621104	-0.199024	0.0560467	0.24011	36601.6	3	1.30827	0.164194	-0.166866	0.390484	0.177788	1.18146	0.481444	1.30597	0.826098	0.98096	0.00749175	0.453688	0.0491733	O35474	O35474	EGF-like repeat and discoidin I-like domain-containing protein 3
-0.157828	-0.331607	-0.51619	-0.252329	0.0236035	-0.577053	-0.413482	-0.621327	-0.0989364	-0.68756	0.454484	-0.0796073	-0.48457	0.0159315	-0.368301	-0.323982	2.36989	0.0896768	0.0284753	2.33753	-0.239706	0.0213379	-0.197752	-0.124553	0.233915	-0.508956	0.13221	0.958555	-0.0392183	-0.0609574	-0.103481	-0.478209	17883.1	2	1.54697	NaN	0	0.577543	-0.449949	1.97754	1.05697	0.497327	0.34379	0.705176	0.00777514	0.155433	0.0283814	Q3UHK1	Q3UHK1	Proton myo-inositol cotransporter
-0.243193	-0.397197	-0.482755	-0.327904	-0.152118	0.25123	-0.51758	-0.692688	-0.386099	-0.114813	-0.198412	-0.587967	0.0959509	0.135299	0.69144	0.355044	-0.287284	0.00840395	0.304168	0.972398	0.465834	-0.0347939	0.484968	0.31719	-0.399535	0.19854	0.0420542	0.0748303	-0.0206578	0.121549	0.632368	-0.308274	15621.3	2	1.89084	NaN	0	NaN	0	NaN	0	NaN	0	0.52296	0.00933672	0.0388039	0.0128577	Q9CSH3	Q9CSH3	Exosome complex exonuclease RRP44
-0.449859	-0.0851461	-0.175331	0.168913	-0.40688	-0.159747	-0.326651	-0.393224	-0.101857	-0.0240018	-0.329076	-0.447148	-0.20816	0.21428	0.127315	-0.523282	0.386442	1.17865	-0.574381	0.100778	-0.342445	0.0682053	0.226623	0.992119	0.186947	0.0350904	0.269927	-0.00388607	-0.153931	-0.23582	0.681412	0.304117	16872	3	1.16251	0.178394	0.0957674	0.0200714	-0.0175788	1.09754	0.577482	1.3215	0.464136	0.835564	0.00935296	0.763585	0.0687837	A0A286YCV9	A0A286YCV9
-0.345964	-0.311143	-0.146704	0.0203814	-0.384928	0.142984	0.100537	-0.507911	-0.332171	-0.450644	-0.279868	-0.316077	0.436008	-0.0683586	-0.0657709	-0.513919	-0.294011	0.215251	0.0296165	1.79607	-0.1365	0.392019	-0.0305921	0.194721	0.0974453	0.308678	0.451301	0.323579	-0.0188173	-0.575469	0.246609	0.0236445	17394	3	1.18404	0.0880266	-0.0555176	0.219148	-0.153683	1.31139	0.565625	1.00243	0.46746	0.579057	0.00979628	0.794182	0.065457	Q8BGT7	Q8BGT7	Survival of motor neuron-related-splicing factor 30
0.00351222	0.0956422	0.437724	0.245068	0.183262	-0.212097	0.0665254	0.337958	0.0686694	0.0139624	-0.153996	-0.0666897	0.0688926	0.065543	0.0254849	0.20952	-0.203969	-0.00693793	0.107343	-0.16007	-0.207095	-0.224021	0.238503	-0.129435	0.272086	-0.271135	-0.361299	-0.171234	-0.114073	-0.0860267	0.241943	-0.31356	223923	3	1.31722	0.647686	-0.139403	0.165247	-0.0657213	1.44631	-0.303054	0.896839	-0.229372	0.295295	0.00987979	0.704536	0.0481706	Q8VHQ9	Q8VHQ9	Acyl-coenzyme A thioesterase 11
0.813629	-0.892733	1.7302	-0.743301	0.63576	1.22518	1.62332	0.568384	-0.92982	1.80066	-0.927649	0.0821047	-0.891914	-0.802347	3.94565	-0.888806	3.96623	-0.931145	2.16174	-0.839994	-0.956254	-0.858822	-0.943094	-0.935503	-0.826025	-0.933049	-0.796437	-0.896331	-0.794973	-0.925759	-0.891905	-0.946994	168607	4	1.626	0.85914	-1.68291	0.445827	-0.939384	1.26093	-2.37376	1.01294	-1.63023	0.0827698	0.0103907	0.61394	0.0236591	Q5XJV6	Q5XJV6	Serine/threonine-protein kinase LMTK3
-0.216441	0.055754	-0.18827	-0.403611	-0.215046	-0.136023	-0.324805	-0.174456	-0.0330282	-0.145808	-0.00701404	0.0549029	0.279995	0.236864	-0.246906	0.0300573	-0.199098	0.110033	-0.184297	0.359902	0.00733383	0.151395	0.336861	0.438789	-0.0284433	0.0422931	0.24549	-0.284193	0.0123511	0.15548	0.0266068	0.243333	881019	32	2.12739	1.87527	0.351408	0.255319	-0.0883451	2.33475	0.482653	0.130054	0.0429001	0.181141	0.0105769	0.0295965	0.00745773	Q9ES97	Q9ES97	Reticulon-3
-0.122261	-0.499761	-0.169975	0.213966	-0.450988	-0.297645	-0.434721	-0.414498	-0.0591498	0.715947	-0.359897	-0.140372	-0.048821	-0.112374	-0.723182	-0.402295	1.02224	0.222917	-0.154443	0.1181	-0.17201	-0.442659	-0.319918	1.05878	-0.203183	0.885857	0.19328	-0.293535	0.121516	0.406775	-0.116039	0.978352	16791.3	2	1.15694	0.186512	0.142007	0.196825	0.151271	1.22971	0.592715	1.04925	0.601979	0.508571	0.0108834	0.983274	0.0696731	A2AHG0	A2AHG0	Leucine zipper putative tumor suppressor 3
-0.256345	0.0437437	-0.277456	-0.0831015	-0.200879	-0.318468	-0.252556	-0.403736	-0.141309	-0.0282763	-0.390398	0.110172	0.0702395	0.226468	-0.28455	-0.433615	-0.244805	-0.0993092	-0.041806	0.296305	0.806174	-0.00422244	0.533175	-0.181852	-0.031902	0.717101	-0.0582022	-0.16422	-0.45456	0.7871	0.71555	0.0455398	21285.9	8	1.14583	0.43007	0.158364	0.0439701	0.0329132	1.76526	0.491593	0.741753	0.366143	0.551722	0.0115859	0.695747	0.0714769	Q70FJ1	Q70FJ1	A-kinase anchor protein 9
0.389536	-0.174416	-0.0167076	1.5626	-0.0272392	-0.628849	-0.25613	-0.218589	0.653902	0.934375	0.00011874	-0.244369	0.680817	0.198812	-0.279283	1.27376	-0.0538462	-0.0360229	-0.803486	-0.347286	-0.734058	-0.581857	-0.916565	0.382119	-0.310445	1.20573	-0.777007	-0.017078	-0.137637	-0.23691	0.135343	-0.619334	94376.8	4	1.53542	0.667833	0.464765	0.631663	0.747732	1.12964	-1.08244	1.12008	-0.799473	0.0938093	0.0118438	0.688691	0.0291459	D3YVV7	D3YVV7
-0.435212	-0.0635549	-0.224857	-0.289824	-0.248528	0.181485	-0.184897	-0.120058	-0.0897705	-0.237965	-0.0967701	-0.025886	0.276612	0.139298	-0.246237	0.118427	-0.185407	0.170604	-0.130303	0.0362808	0.243779	0.416725	0.612961	0.137581	-0.159763	-0.226511	0.187275	-0.107778	0.269359	0.00319298	0.00332031	0.276421	157158	18	1.63114	0.966709	0.251615	0.520482	-0.163418	2.04946	0.488202	0.220423	0.0731695	0.679704	0.012918	0.0596147	0.0233809	Q5SV85	Q5SV85	Synergin gamma
-0.235804	-0.279021	0.194126	-0.0896825	-0.478238	0.045461	-0.642785	-0.269254	-0.297892	-0.208551	-0.162089	-0.477895	0.0992157	-0.468913	-0.0565747	-0.117608	-0.238075	0.0109968	0.183255	-0.386833	0.101915	-0.136812	0.629859	0.208478	-0.441165	0.277234	2.86072	-0.111427	-0.0884179	0.0653268	0.522379	-0.0119308	18121.2	2	1.11169	0.0918853	0.0587786	0.293585	0.221549	1.03196	0.452245	1.13476	0.615015	0.494256	0.0134968	0.690618	0.0773236	Q3UVC0	Q3UVC0	Kinase suppressor of Ras 2
-0.289395	-0.128107	-0.0851713	-0.673719	-0.589886	-0.302491	-0.631583	-0.575049	0.806825	0.113893	-0.438442	-0.479505	-0.429863	-0.264766	-0.41525	-0.181121	-0.0883484	0.0611928	-0.611625	0.828174	1.62193	-0.457754	1.55199	0.507825	-0.207821	-0.28869	-0.0272781	0.64576	-0.35388	0.493761	1.51704	-0.628643	23605.5	4	1.27011	0.866756	0.479192	0.245362	-0.275897	1.74067	1.1032	0.425645	0.348116	0.719802	0.0151723	0.189129	0.0536892	P46662	P46662	Merlin
-0.250614	0.0335801	-0.170148	-0.466321	-0.222735	-0.0986511	-0.323663	0.111264	0.504905	-0.314679	0.13112	0.0631881	-0.22744	0.125257	-0.431364	-0.083427	-0.0898089	0.136058	-0.222931	-0.0105569	-0.195978	-0.0199151	0.427346	0.248983	0.100282	0.0685895	0.288965	0.377809	0.328699	-0.163054	-0.0413943	0.386632	560992	4	1.34613	0.489152	0.204686	0.652988	0.183316	1.21791	0.32855	0.913584	0.30718	0.126626	0.0154322	0.931516	0.045068	Q9JJU8	Q9JJU8	SH3 domain-binding glutamic acid-rich-like protein
-0.557952	0.0529489	0.246515	-0.282562	-0.25107	-0.626801	0.0834498	-0.220842	0.19615	-0.198851	-0.30172	-0.500599	0.43756	-0.338938	-0.443115	-0.259904	0.313219	-0.210028	-0.0642259	0.844308	-0.543978	0.00926893	-0.0197173	0.792139	0.242508	0.258792	1.03607	0.403681	-0.254003	-0.211953	0.583356	-0.213705	14817.3	3	1.0094	NaN	0	NaN	0	NaN	0	NaN	0	0.634213	0.0154782	0.819423	0.0978582	Q9JI46	Q9JI46	Diphosphoinositol polyphosphate phosphohydrolase 1
0.598649	0.0915505	0.160152	1.70296	1.66073	0.401216	-0.946314	2.07579	-0.374359	0.438254	-0.889094	0.223173	-0.34876	-0.888082	-0.0227028	0.436998	1.22725	-0.955073	0.996027	-0.926379	-0.957967	-0.934532	-0.937626	-0.955714	-0.903691	0.732851	-0.821964	1.59268	0.690198	-0.960635	-0.9593	-0.246293	286730	5	1.3297	0.585187	-1.00935	0.507641	1.30726	1.87565	-3.10565	0.336759	-0.78904	0.845146	0.0155183	0.136507	0.0468063	Q99LD8	Q99LD8	N(G),N(G)-dimethylarginine dimethylaminohydrolase 2
-0.811063	-0.115708	-0.829003	-0.852171	-0.745961	-0.601044	0.838557	0.475347	0.223365	-0.856678	-0.456583	0.196464	-0.601772	0.362273	-0.929947	-0.904945	-0.0848455	-0.806154	-0.863315	0.221694	2.49086	0.26451	0.179536	1.42953	0.410927	0.373055	-0.122164	0.905135	-0.705939	0.191854	1.38196	0.34222	74199.5	3	1.02237	0.0867639	-0.186923	0.262265	0.409522	0.699764	1.04178	1.47575	1.63823	0.832062	0.0155246	0.570863	0.0949799	P10922	P10922	Histone H1.0;Histone H1.0, N-terminally processed
0.116767	0.0885272	0.00245547	-0.16212	-0.143428	-0.493705	0.0106528	-0.0425385	-0.272198	-0.121314	-0.082489	-0.377727	0.142846	0.295082	-0.298411	-0.0864084	0.458442	0.0258321	0.072043	0.0454687	-0.111855	0.026463	0.356651	0.0944276	-0.0884799	0.19194	0.373676	0.00250054	0.0140765	0.1587	-0.187163	-0.00871392	222025	7	1.01925	0.0783579	-0.0383601	0.317439	-0.0850153	1.15493	0.300648	0.935723	0.253993	0.571627	0.0156644	0.830205	0.0956646	Q8BHL5	Q8BHL5	Engulfment and cell motility protein 2
-0.465382	-0.274818	0.0719629	0.173997	-0.294855	-0.386787	-0.477193	0.527745	0.386964	-0.341428	-0.499557	-0.552334	-0.324567	0.0416993	-0.590099	0.112828	-0.460877	-0.230248	0.283004	1.22694	1.38101	0.104067	0.0323456	0.455976	-0.260438	-0.120538	0.40863	0.196891	0.0872212	-0.261681	0.168622	-0.119096	15946	3	1.16541	NaN	0	NaN	0	NaN	0	NaN	0	0.273566	0.0157697	0.76436	0.0683273	Q64735	Q64735	Complement component receptor 1-like protein
-0.666305	-0.292117	-0.529913	-0.132052	-0.215343	0.508997	0.303113	-0.513641	0.0643385	0.119501	-0.118838	-0.503079	-0.61653	-0.1559	-0.332452	-0.585722	1.65382	-0.0183448	-0.341396	0.118389	0.0236616	0.403801	-0.195408	-0.319041	-0.0736819	0.100206	0.729709	1.58772	0.790092	0.0842397	-0.531153	-0.346676	20000.2	3	0.972543	0.0863165	-0.0788722	0.109034	0.105504	0.85447	0.548083	1.22583	0.732459	0.957909	0.0161312	0.715142	0.106526	Q3UWL8	Q3UWL8	Prefoldin subunit 4
0.894598	0.38046	0.317327	-0.136669	-0.354422	0.0793996	-0.130684	-0.0779493	0.0325071	-0.215774	0.0873287	0.0364281	0.597627	-0.0358598	0.463454	0.373088	0.487113	-0.0011703	-0.274448	-0.588852	-0.153961	0.00151265	-0.229545	-0.27159	-0.287484	-0.478563	0.137765	0.107975	-0.50448	-0.527971	-0.59494	0.86778	16451	2	1.01986	NaN	0	NaN	0	NaN	0	NaN	0	0.855579	0.0164027	0.509517	0.0955296	P04104	P04104	Keratin, type II cytoskeletal 1
-0.145032	-0.162228	-0.0954228	-0.26353	-0.0366958	0.116768	-0.197663	-0.0125677	-0.323821	-0.106888	-0.260872	0.236257	-0.082812	0.0510061	-0.354097	-0.0826568	-0.439453	0.0683582	0.0295368	0.0418863	0.308533	0.00468009	0.168879	0.81202	-0.00777422	-0.0918279	0.144648	0.523175	-0.0786434	0.179196	0.0724225	-0.0153822	191902	6	0.944149	0.135677	-0.0459707	0.00249826	0.0013752	0.796779	0.267112	1.35459	0.314457	0.847201	0.0170648	0.837911	0.113724	Q2TPA8	Q2TPA8	Hydroxysteroid dehydrogenase-like protein 2
-0.619852	-0.0535132	-0.0446306	0.0510503	-0.242621	0.350895	-0.405309	-0.208304	-0.380613	-0.195822	-0.118645	0.289495	-0.0448011	-0.436957	-0.199194	-0.0295742	-0.384911	0.132526	-0.152357	0.0845158	-0.000786343	0.309873	0.351464	0.128549	-0.364722	0.255177	0.0477358	0.375857	1.13937	-0.0830208	-0.0253318	0.474456	52800.5	6	1.01325	0.0862296	0.0553781	0.326546	0.167749	0.820375	0.359599	1.23651	0.47197	0.503456	0.0174692	0.735383	0.0969941	Q8CCJ3	Q8CCJ3	E3 UFM1-protein ligase 1
-0.0720213	-0.701947	-0.0731487	3.36807	-0.409157	0.301678	0.983263	0.224885	0.023796	-0.57139	0.21058	0.0839707	0.0152048	-0.00887621	1.21317	0.00965937	-0.0784126	0.621257	-0.0718894	-0.385918	-0.840662	-0.612422	-0.385749	-0.693136	-0.861908	-0.514937	0.182645	0.189074	0.520457	-0.58468	-0.310295	-0.771158	53195.2	4	0.921007	0.0679897	-0.0865462	0.00588296	-0.00979865	0.992913	-0.965186	1.04361	-0.888438	0.896836	0.0178264	0.917732	0.119948	P19253	P19253	60S ribosomal protein L13a
-0.310736	0.0185081	-0.0526602	-0.310804	-0.0713406	0.0698135	-0.138537	-0.126027	0.00684433	-0.139635	-0.0174139	-0.0280638	0.115288	-0.0273877	-0.227278	-0.054182	-0.352204	0.228549	-0.0914573	0.211983	0.172595	0.171749	0.326343	0.160846	-0.210796	-0.11842	0.217815	0.196938	-0.0335582	0.209278	0.0283134	0.175637	1.1831e+06	8	1.0707	0.579231	0.116979	0.122094	-0.0464575	1.25874	0.304367	0.732797	0.14093	0.693578	0.0179748	0.364094	0.0849775	O55023	O55023	Inositol monophosphatase 1
-0.700955	-0.000202144	0.0356464	-0.115952	-0.257703	-0.0175688	0.0710323	0.0276458	-0.483902	0.227964	-0.434707	-0.180165	-0.0784115	-0.182154	0.0561499	-0.361574	-0.542922	0.0479029	0.599728	0.297703	0.391973	-0.0946716	0.23381	0.189346	-0.279452	0.216066	0.681067	0.321878	-0.0516493	0.294481	0.147806	-0.058212	19498.9	2	0.929093	0.0979117	-0.0697186	0.0967511	0.0613545	0.669286	0.383128	1.61432	0.514201	0.981527	0.01828	0.717034	0.117735	Q8K012	Q8K012	Formin-binding protein 1-like
-0.376463	-0.190636	-0.573338	-0.168218	-0.550022	-0.139628	-0.349599	-0.16302	0.457389	1.59314	0.25134	-0.42457	-0.484073	-0.566361	-0.567794	-0.233147	-0.0467979	0.29267	0.720951	0.00836262	0.393575	-0.17925	0.00286849	-0.355864	-0.439829	0.535598	0.666475	0.13198	-0.216661	0.848531	-0.192018	0.314409	18780.3	2	1.04963	0.377029	0.302302	0.117663	0.082435	2.13623	0.673416	0.564415	0.453549	0.401419	0.0187308	0.630105	0.0892019	Q9D3A8	Q9D3A8	Carboxyl-terminal PDZ ligand of neuronal nitric oxide synthase protein
-0.752993	-0.141021	-0.790829	-0.448819	-0.276859	-0.197428	-0.472705	0.472767	-0.212493	-0.181858	0.0798806	-0.207213	-0.245334	0.108792	-0.545715	-0.00534831	-0.353115	0.756382	-0.189915	2.53773	-0.399764	0.140744	-0.158381	0.13474	1.16465	-0.0879378	0.759425	-0.148628	0.0588807	0.0799213	-0.559943	0.0823862	19654.7	4	1.2095	0.783515	0.530195	0.04665	-0.0503231	1.28724	0.949175	0.666431	0.368656	0.372031	0.0189192	0.281771	0.0617305	P98156	P98156	Very low-density lipoprotein receptor
-0.114205	0.27179	-0.637479	-0.67425	-0.185436	0.602796	-0.746198	-0.704291	-0.503922	-0.715244	-0.394373	0.700892	-0.468814	-0.663848	-0.3406	-0.724202	-0.236129	-0.468425	-0.541605	-0.40485	0.690052	0.897857	4.56531	-0.589601	-0.339424	0.450679	0.710808	0.562414	-0.359165	0.19591	-0.555416	0.718968	33579.4	2	0.923574	0.151236	-0.182998	0.0761468	0.110806	0.641639	0.745017	1.65248	1.03882	0.920433	0.0189568	0.684778	0.119241	Q9CQX5	Q9CQX5	Claudin domain-containing protein 1
0.00238671	-0.107539	1.17052	0.272124	-0.265758	-0.00430315	0.476725	0.0507997	-0.251824	0.988847	0.707086	-0.116418	0.00489452	-0.231758	0.474934	-0.235261	0.627062	0.611296	-0.796529	-0.108495	-0.91395	0.0901346	0.0656504	-0.244418	-0.193974	0.691399	-0.930779	-0.598082	-0.957659	0.494642	0.17458	-0.946329	251171	3	1.19628	0.091761	-0.0649815	0.488955	-0.986382	0.733997	-0.785707	1.23414	-1.70711	0.30268	0.0189956	0.365309	0.0636384	P61087	P61087	Ubiquitin-conjugating enzyme E2 K
-0.163538	-0.0770498	-0.154539	-0.172136	-0.0671352	-0.0241413	-0.147456	-0.140374	-0.124709	-0.200532	0.102925	-0.156455	0.117006	0.210241	-0.183593	-0.119543	-0.298243	0.0416	-0.0276403	0.533446	-0.0602192	0.265651	0.105924	0.351722	-0.160787	-0.151872	0.348222	0.0464323	-0.0962976	0.119505	0.193827	0.0897595	1.20017e+06	15	1.04264	0.564787	0.101419	0.183302	-0.069016	1.48237	0.303303	0.542352	0.132869	0.85492	0.0192403	0.340029	0.0906478	Q80TZ3	Q80TZ3	Putative tyrosine-protein phosphatase auxilin
-0.160117	0.386545	-0.181072	0.625328	-0.230382	0.514643	-0.161928	0.00949871	0.155243	-0.254212	1.09171	0.0753601	0.719787	0.317217	-0.0594349	-0.164055	-0.0933106	0.0973395	-0.376016	-0.305475	-0.357022	-0.460367	0.0759901	-0.321618	-0.229854	0.207239	-0.829869	0.590902	-0.251534	0.152092	0.0318726	-0.614501	126934	4	0.913449	0.261016	0.146883	0.0380305	-0.0424118	1.42529	-0.475897	0.887339	-0.665192	0.822782	0.0198995	0.685187	0.122054	Q5M8N4	Q5M8N4	Epimerase family protein SDR39U1
-0.168542	-0.517363	-0.0145139	0.394699	0.230149	-0.425418	-0.491053	-0.260215	-0.384361	-0.179485	0.122569	-0.406339	-0.159141	0.616795	-0.458581	-0.205681	0.320309	-0.106595	-0.490048	0.314151	-0.484795	-0.0499221	0.300503	0.415597	0.0210753	0.0683007	0.147058	0.319621	0.538608	-0.0124179	0.414315	0.590722	18551	4	1.21007	0.0705123	0.0528979	0.87213	0.373276	0.454315	0.284859	1.93878	0.605238	0.248338	0.0202203	0.383013	0.0616494	Q8K093	Q8K093	Thyrotropin-releasing hormone-degrading ectoenzyme
-0.44504	0.011167	-0.077394	-0.256543	-0.192556	-0.020214	-0.423006	-0.350898	0.378728	-0.0992166	-0.0684282	0.253289	0.0225009	0.111949	-0.254176	-0.286529	0.0235586	-0.143497	-0.202283	0.51398	0.295371	0.0854313	0.644663	0.391586	-0.21882	0.149674	0.0235586	0.417849	-0.359398	-0.0887706	0.141639	0.0218238	2.3645e+06	6	1.79766	1.32881	0.367922	0.678195	-0.242586	2.35837	0.612609	0.0041531	0.00210142	0.620227	0.0204407	0.021237	0.0159347	Q91WS0	Q91WS0	CDGSH iron-sulfur domain-containing protein 1
0.0251536	-0.276989	0.932502	-0.316821	-0.345683	-0.451895	0.17133	-0.369379	0.48763	-0.420374	-0.122238	-0.39377	-0.575772	-0.554032	-0.498433	-0.241444	-0.427749	0.744217	0.200499	0.348337	-0.498795	0.674028	1.04409	-0.100409	-0.429041	0.233848	0.998217	-0.179411	0.0544589	-0.209837	0.403599	0.0941579	17788.3	3	1.08792	0.623383	-0.371563	0.107987	-0.0942457	0.598505	0.408174	NaN	0	0.306826	0.0210861	0.540468	0.0816736	Q6ZPZ3	Q6ZPZ3	Zinc finger CCCH domain-containing protein 4
-0.252503	-0.266813	-0.0820852	-0.181292	-0.191163	0.489394	-0.229693	-0.0649966	-0.492683	0.23308	-0.254246	-0.140233	0.221841	-0.177061	-0.398494	-0.104523	-0.450669	-0.0442182	0.304997	-0.188094	0.568319	0.392799	0.10704	-0.0600203	-0.154707	0.462268	0.509136	0.138063	-0.0849048	0.260828	0.0511731	0.0794582	241112	3	0.968093	0.183474	-0.0897667	0.307541	0.14202	0.534105	0.227888	1.52931	0.459675	0.854202	0.0212565	0.417639	0.107624	Q64337	Q64337	Sequestosome-1
0.246515	-0.212726	0.159576	1.22847	0.502286	-0.0233101	0.199595	0.332228	0.134117	0.736089	0.11246	-0.226605	-0.162271	-0.5561	-0.0266243	-0.0427843	0.421759	0.623769	0.254118	-0.77943	1.03276	-0.180309	-0.217034	-0.597503	-0.755051	-0.429479	-0.603689	0.603066	-0.668701	-0.047833	-0.679577	-0.377775	51299.8	4	1.54262	0.921393	-0.41759	0.790837	-0.738522	0.634859	-0.518543	1.37149	-0.839475	0.048356	0.0220148	0.571174	0.0286669	Q8R180	Q8R180	ERO1-like protein alpha
-0.289576	-0.081247	-0.264302	-0.40824	-0.223573	0.0892228	-0.197847	-0.0818505	-0.114172	-0.0818008	-0.0704219	0.0611811	0.414706	0.283758	-0.327939	0.0423017	-0.254485	0.0589653	-0.137835	0.230996	0.348804	0.346337	0.0474862	0.368943	-0.103297	-0.00824567	0.179996	-0.156312	0.0983358	0.00242791	0.0817717	0.145911	1.98628e+06	10	1.68104	1.25131	0.315983	0.370492	-0.106564	2.04141	0.452975	0.0854754	0.0304275	0.303478	0.022275	0.0434505	0.0208429	P97315	P97315	Cysteine and glycine-rich protein 1
-0.150457	0.358506	0.0185803	0.815347	0.232763	-0.230303	-0.36832	0.35839	-0.0449652	-0.0997824	0.756657	0.538603	0.0821647	0.126654	0.104728	-0.0226337	-0.614927	0.693846	-0.852453	-0.289051	-0.115717	-0.171209	0.105036	-0.613975	0.330991	-0.736796	-0.156989	-0.151112	-0.598879	0.520125	0.321088	-0.14591	51899.7	4	0.993165	0.191902	0.102006	0.333331	0.376426	1.06828	-0.792989	0.838674	-0.518568	0.387071	0.0228375	0.618221	0.101586	Q99J27	Q99J27	Acetyl-coenzyme A transporter 1
-0.320951	-0.0374686	0.0364827	-0.120677	-0.0948905	-0.0171679	-0.0589538	-0.158039	-0.142886	0.00344678	0.00731338	0.0564447	0.0866301	0.0999697	-0.147816	0.00252785	-0.160263	0.150793	-0.0424478	0.130179	0.227089	0.210003	0.10125	0.162852	0.00803811	-0.12841	0.0684796	0.184435	-0.166909	0.0265018	0.0309969	0.00344678	4.13784e+06	16	1.5966	0.979369	0.144307	0.774103	-0.12692	2.01092	0.280459	0.0434243	0.00923252	0.886432	0.0232218	0.0326194	0.0253166	Q9Z1Z2	Q9Z1Z2	Serine-threonine kinase receptor-associated protein
-0.0897957	0.0790465	-0.311766	0.142426	-0.207096	-0.423614	0.0963368	0.0436283	-0.200991	-0.1069	-0.214506	-0.416111	0.0257797	-0.573596	-0.608912	-0.1851	-0.158396	0.791187	-0.487134	0.204036	0.355216	-0.26549	-0.443607	1.13386	-0.0591308	0.129564	1.50063	-0.136212	0.440034	-0.0874655	0.114371	-0.0802893	2.14578e+06	7	1.20607	1.01746	-0.393228	0.240283	0.186341	0.256458	0.180746	2.00318	0.760314	0.602153	0.023373	0.150808	0.06222	Q60668	Q60668	Heterogeneous nuclear ribonucleoprotein D0
-0.382484	0.01905	-0.358581	-0.176351	-0.126691	-0.360552	-0.110409	-0.312503	0.385416	-0.0218824	0.381458	-0.278359	-0.184444	-0.211733	-0.111483	-0.160883	-0.0378235	0.257405	-0.0824688	0.471026	-0.246153	-0.223016	-0.233307	0.58028	-0.294201	-0.310451	0.203299	0.0082061	0.58028	0.249948	0.287088	0.800317	6.1417e+06	3	1.28863	1.15936	0.313956	0.280526	0.152697	1.44184	0.41892	0.591047	0.25766	0.110367	0.0237925	0.573379	0.0514483	Q52KR3	Q52KR3	Protein prune homolog 2
0.15989	0.176334	0.0586718	-0.507036	0.0244891	-0.146026	0.0651228	0.107968	-0.0900301	-0.791133	0.149233	-0.0266522	0.0947671	0.135899	-0.732587	-0.827718	-0.348829	0.198978	-0.185247	0.0721891	0.178911	-0.0379076	0.24199	0.235822	0.427884	-0.16769	0.0680156	0.38883	0.271568	0.000663976	0.212661	0.590967	60147	7	1.61062	0.906911	-0.739438	0.772288	0.233223	0.184196	0.0864418	1.51332	1.0591	0.30009	0.023862	0.0521024	0.0245121	Q9CR00	Q9CR00	26S proteasome non-ATPase regulatory subunit 9
0.484959	-0.0956948	-0.0788011	-0.253011	-0.17038	-0.138991	-0.152717	-0.224862	-0.165557	-0.0593896	-0.0766564	-0.0241098	-0.142789	-0.0463862	-0.204495	-0.175833	0.30921	-0.198856	-0.0709244	-0.0157668	-0.24665	0.0739939	0.324871	0.528162	-0.131232	0.0803325	0.759441	0.104428	-0.0242724	0.27025	-0.156585	-0.0816903	429136	11	0.82397	0.0769083	-0.0242095	0.038863	0.0195208	0.719939	0.232211	1.2896	0.275941	0.982575	0.0239128	0.838647	0.149979	P21279	P21279	Guanine nucleotide-binding protein G(q) subunit alpha
-0.109108	-0.109646	0.0538767	-0.298563	-0.00253283	0.129634	-0.0750233	-0.0464359	-0.0697315	0.0259932	-0.16619	-0.194694	-0.160702	-0.0597172	0.117439	0.117542	0.214176	0.134491	0.128291	0.0813679	-0.0279257	0.0167637	-0.0635828	0.0826081	-0.0926763	0.0855031	0.0908765	-0.0758289	0.41261	-0.0519443	-0.0626934	-0.0241749	967570	22	0.858913	0.0531281	0.0145168	0.291117	-0.058676	1.38904	0.191365	0.587706	0.118173	0.739405	0.0257667	0.582056	0.138384	Q8BKX1	Q8BKX1	Brain-specific angiogenesis inhibitor 1-associated protein 2
-0.0550065	0.0444293	0.0557954	-0.485684	-0.158917	-0.24806	-0.127234	-0.279071	0.441231	-0.188318	-0.0880319	-0.056305	0.00178197	0.181097	-0.119939	-0.0913884	-0.207515	-0.0414915	-0.0371071	0.158945	-0.21745	0.286528	0.290243	0.249877	0.00974679	-0.0631507	0.128514	0.269433	0.00106571	0.0225008	0.0823317	0.241151	223462	6	1.4077	1.00139	0.269886	0.183768	0.054651	1.26087	0.336249	0.540829	0.121014	0.106033	0.0258683	0.277437	0.0391115	Q9R0N7	Q9R0N7	Synaptotagmin-7
-0.237404	-0.143219	0.173062	0.0622039	0.62886	0.46726	0.865004	0.0937585	-0.303037	-0.0312324	-0.0298232	-0.0704917	0.436318	-0.0905354	-0.0566913	0.28603	0.16207	-0.236663	0.0244665	-0.447475	-0.0406056	0.142244	-0.542047	-0.0701445	-0.549615	-0.307862	0.404131	0.131496	0.46991	-0.616433	-0.218208	-0.355327	20377.4	2	0.963736	0.677386	-0.255046	0.113455	-0.0919304	1.32022	-0.510288	0.632865	-0.347172	0.349341	0.0259292	0.657994	0.108709	Q8R3L5	Q8R3L5	Solute carrier organic anion transporter family member 3A1
-0.341207	-0.58798	-0.46614	2.39422	-0.626842	0.0781412	-0.333474	-0.781205	-0.619551	-0.490689	-0.155691	-0.572967	0.424602	-0.0183155	0.0596568	-0.541071	0.777831	0.377678	-0.472754	1.45472	-0.391475	0.0753831	0.703081	-0.0914835	-0.0353885	-0.00532833	0.4359	-0.128582	-0.471134	-0.0122632	-0.0259064	0.388241	21561.7	2	0.850074	0.067093	0.0899251	0.337136	-0.240021	0.950835	0.849668	NaN	0	0.798566	0.0260179	0.575659	0.14123	Q3TW96	Q3TW96	UDP-N-acetylhexosamine pyrophosphorylase-like protein 1
0.597122	0.521677	0.845982	-0.864406	0.893878	0.669883	0.897595	1.17955	0.119981	0.839122	0.526135	-0.898886	-0.92052	-0.879806	1.0989	0.866158	0.793341	-0.822088	0.886678	-0.904726	0.466007	0.214517	-0.94686	-0.86731	0.51659	0.444916	-0.823449	-0.77686	-0.905154	-0.94055	-0.924004	-0.903407	174958	2	1.18362	0.68493	-1.17323	0.447797	-0.956832	1.0898	-1.67898	0.78432	-1.46258	0.12281	0.0262455	0.872743	0.0655204	Q8CI96	Q8CI96	CAP-Gly domain-containing linker protein 4
-0.171332	-0.0560184	0.439728	-0.3499	-0.0961447	-0.259992	-0.59164	-0.637704	-0.113198	0.495944	-0.437033	-0.401956	0.214864	-0.186036	-0.223616	0.00222395	-0.303892	0.367297	0.754845	-0.0589392	0.151019	-0.266205	0.377194	0.426595	-0.360927	0.840987	0.109057	-0.136365	0.429322	0.496003	-0.265861	-0.18832	16774.7	3	0.975934	0.464562	0.280738	0.165411	-0.107646	1.39149	0.646241	0.475636	0.257856	0.65688	0.0263285	0.322326	0.105698	Q5ND34	Q5ND34	WD repeat-containing protein 81
-0.287784	-0.103601	-0.249307	1.09459	-0.307692	-0.437372	-0.594635	-0.249315	-0.616079	-0.385912	-0.558906	-0.259317	-0.506571	0.617993	-0.400633	0.0593468	0.236428	-0.337038	-0.109139	0.60906	-0.0200658	-0.364772	-0.20676	0.179151	-0.174784	-0.206011	0.104665	2.89243	0.734036	0.372793	-0.396301	-0.1285	18588.9	4	0.946254	0.246967	-0.200947	0.396115	0.295836	0.528065	0.315435	1.26579	0.812218	0.845912	0.0271796	0.313253	0.113174	Q69ZS8	Q69ZS8	Kazrin
0.162727	0.317762	-0.821815	-0.918308	-0.449103	-0.824858	-0.927847	-0.902519	0.947187	-0.285827	0.376598	-0.0705931	0.470539	0.647769	-0.878232	-0.186245	-0.251471	0.63421	-0.892376	0.416305	0.552455	0.306141	-0.202321	0.396531	0.837668	-0.733125	0.2649	0.821932	0.428087	-0.258113	0.610562	0.411382	123907	2	1.94807	1.56478	1.84808	0.248884	0.336514	1.5418	1.84553	0.251845	0.33396	0.0277971	0.0281336	0.119525	0.0112701	Q921E2	Q921E2	Ras-related protein Rab-31
-0.252162	0.00922738	-0.421663	-0.627883	-0.235658	-0.252269	-0.317475	-0.115106	-0.0184809	-0.356951	0.131617	-0.00872642	0.399016	0.304051	-0.0112355	-0.145111	-0.503056	0.00180556	0.183111	0.703417	-0.230815	0.323525	0.038985	0.222023	0.177562	-0.188405	0.623401	-0.200457	0.489244	0.103166	-0.0448453	0.220149	282949	23	1.72611	1.76192	0.535434	0.189831	0.109123	1.43291	0.566467	0.34339	0.140156	0.0439845	0.0283207	0.173947	0.0187884	A2AGT5	A2AGT5	Cytoskeleton-associated protein 5
-0.909918	0.25339	-0.92435	-0.859107	-0.847025	-0.114812	-0.875277	0.0203871	0.312919	0.1607	-0.195012	0.0416422	0.549352	0.475362	-0.247017	-0.144686	-0.926923	-0.307927	-0.0423556	0.792507	0.501291	0.681629	-0.386475	-0.0742737	0.560455	0.339431	0.763655	0.398376	0.639996	0.404585	-0.0807753	0.040255	136909	3	2.80673	2.31193	2.05861	0.815074	0.813894	1.1577	1.56891	1.01481	0.324194	0.0015439	0.0283533	0.139698	0.00156051	Q80X85	Q80X85	28S ribosomal protein S7, mitochondrial
-0.730542	0.142958	-0.453832	-0.420889	-0.411477	-0.425323	-0.378551	-0.729686	0.316659	-0.0482825	0.515827	-0.173745	0.361112	0.552104	-0.377636	0.11568	-0.517117	0.904987	0.0349587	-0.30321	0.236251	0.146573	0.0133817	0.288243	-0.350551	0.901151	0.311247	0.439944	0.197608	0.144164	0.128048	-0.430057	23206.5	4	2.72091	2.65674	1.08755	0.121077	0.092813	2.05987	0.974141	0.0275737	-0.0205916	0.00801511	0.0287034	0.0229761	0.00190147	Q9ER88	Q9ER88	28S ribosomal protein S29, mitochondrial
-0.173361	0.029647	-0.149925	-0.311165	0.0131687	0.356644	-0.31754	-0.21522	-0.193116	-0.0286293	0.0546542	0.0331337	-0.0510478	-0.542896	-0.115535	-0.00501438	0.0534572	0.166731	-0.18505	0.810387	-0.0994917	-0.15895	-0.177776	0.0936388	0.0403171	0.361763	0.355597	0.267164	-0.268303	-0.0141722	0.0669551	0.303936	66820	4	0.830339	0.0415142	-0.021314	0.307177	0.122954	0.610035	0.21888	1.22642	0.363147	0.690722	0.0289759	0.572803	0.147796	B1AWC9	B1AWC9
-0.0121934	-0.100597	-0.106092	-0.208726	0.0133425	0.18441	-0.084149	-0.153288	-0.267827	0.369673	-0.275328	0.177437	-0.167306	-0.118737	-0.403745	-0.15121	-0.177274	-0.0677017	0.101113	0.129642	-0.00733251	0.0163008	0.660704	0.444446	0.0240846	0.00189546	0.119005	0.203006	-0.226126	0.154473	-0.156599	0.0846992	283922	8	0.963018	0.320441	-0.11001	0.422758	-0.129035	1.07166	0.247624	0.768259	0.2286	0.257955	0.0290816	0.927432	0.108889	Q8BH58	Q8BH58	TIP41-like protein
-0.0578337	-0.673671	-0.064335	-0.391901	0.432195	-0.00570772	0.0601079	0.319761	-0.298934	-0.351957	0.163177	-0.174587	-0.16616	0.0799193	-0.47762	-0.290233	0.34009	0.025756	-0.26175	0.790701	0.124202	-0.105018	0.196505	0.340271	0.0736783	-0.0493278	0.425994	-0.221522	-0.161687	0.370359	0.247366	-0.23784	15957	2	0.885142	NaN	0	NaN	0	NaN	0	NaN	0	0.358971	0.02945	0.995729	0.130274	Q91VC3;A0A0N4SVP8;E9PV04	Q91VC3;A0A0N4SVP8;E9PV04	Eukaryotic initiation factor 4A-III;Eukaryotic initiation factor 4A-III, N-terminally processed
-0.437387	-0.607097	-0.598048	-0.728995	-0.306269	-0.592842	-0.129833	-0.5749	-0.286216	-0.689657	0.108002	-0.0869996	0.102952	-0.482459	0.162487	-0.532425	-0.620557	0.222402	-0.137554	2.83002	-0.0617424	0.533552	-0.636634	0.663063	0.136683	-0.715198	2.35851	0.0813601	-0.529514	-0.401019	-0.333116	2.28943	27851	3	1.00126	1.12349	0.598556	0.0662866	-0.109265	1.6515	1.13106	0.372012	0.423242	0.476047	0.0294501	0.30495	0.0997106	Q3UHD1	Q3UHD1	Brain-specific angiogenesis inhibitor 1
-0.350445	0.109755	-0.0747712	0.125356	-0.325797	-0.468715	-0.376615	-0.193041	0.121238	-0.267068	0.73235	-0.311616	0.118438	0.15118	-0.423659	-0.232946	-0.157195	0.320513	-0.0863143	0.489985	0.596309	-0.281998	0.131989	0.162338	-0.0148038	0.199624	-0.00681063	0.210458	-0.273032	0.384962	0.145885	-0.155552	492938	9	1.01375	0.536762	0.255531	0.20597	-0.0903766	1.61559	0.509815	0.341621	0.163908	0.578506	0.0295596	0.248973	0.0968843	Q6IRU2	Q6IRU2	Tropomyosin alpha-4 chain
-0.242956	-0.018327	-0.132312	0.152066	0.357516	-0.331684	-0.0815793	0.267845	-0.592181	-0.285595	-0.245662	-0.468537	-0.470611	0.42156	-0.710674	0.0321234	0.36158	0.692121	-0.269617	-0.203063	-0.4053	-0.0612873	0.196032	0.336267	0.105181	-0.409128	0.535933	0.210859	-0.10367	-0.0930087	0.198208	1.2579	15809.9	3	1.51144	NaN	0	NaN	0	NaN	0	NaN	0	0.249	0.0298459	0.0669593	0.0308003	Q80TN4	Q80TN4	DnaJ homolog subfamily C member 16
-0.277488	-0.200619	-0.198439	-0.170931	0.0212715	0.0955492	-0.123513	-0.0448184	0.0584986	0.168236	-0.217347	0.265251	-0.0759193	-0.149313	-0.0197255	-0.0279129	-0.146898	0.10515	0.0791156	-0.0806911	0.0478955	0.0107874	0.243221	0.053669	-0.0537713	0.0309902	0.0637411	0.21477	0.0306958	0.310017	-0.198439	0.186967	169769	7	1.1827	0.855351	0.168907	0.16044	0.0399384	1.60004	0.231477	0.420075	0.102508	0.163672	0.0299281	0.384591	0.0656597	Q99PU5	Q99PU5	Long-chain-fatty-acid--CoA ligase ACSBG1
-0.242345	0.0549757	-0.0149871	-0.0889376	-0.199325	0.070515	-0.282361	-0.280507	-0.0203469	-0.0933881	-0.035033	0.197628	0.062634	-0.0195863	-0.311623	-0.0693928	-0.0917745	-0.0318806	-0.235336	0.151585	0.0562736	0.0811211	0.436928	0.236143	0.0313711	0.0172402	0.410114	0.0215245	-0.32069	-0.0271153	0.15967	0.376904	539282	17	0.904176	0.589321	0.138702	0.0062041	0.0027678	1.35203	0.288326	0.52143	0.152391	0.469312	0.0300745	0.486719	0.124688	P26043	P26043	Radixin
-0.169918	-0.373268	0.482683	0.036628	-0.778994	-0.510377	-0.591608	-0.176988	-0.320842	0.371855	-0.25747	0.321323	-0.0469346	-0.225315	-0.298731	-0.320152	-0.41828	-0.194475	0.459918	0.776761	-0.347689	-0.0321385	0.550166	0.59562	0.658954	0.78488	0.0380357	-0.528278	-0.299999	0.634163	0.272817	-0.0923459	19679.2	2	1.00534	0.656946	0.43348	0.00176781	0.00170088	1.1829	0.753539	0.56401	0.32176	0.363409	0.030224	0.367116	0.0987787	A2AF47	A2AF47	Dedicator of cytokinesis protein 11
-0.166241	0.0781315	-0.668902	-0.894866	-0.273587	0.0195068	-0.421054	-0.00177449	-0.208684	-0.656716	-0.0610962	0.539757	0.548179	0.194247	-0.377889	0.0135398	-0.483479	0.348957	0.289648	0.188472	0.1788	0.282428	-0.131918	-0.099256	0.517741	-0.370876	0.0166681	0.19012	0.532057	0.312625	0.27497	0.29049	83123.5	6	1.23591	0.688712	0.636917	0.419977	0.199811	1.08718	0.819823	0.667859	0.382717	0.123728	0.0303629	0.41407	0.058089	Q9EPE9	Q9EPE9	Manganese-transporting ATPase 13A1
-0.599756	-0.106187	-0.145672	-0.473582	-0.918958	0.541769	-0.223603	-0.251688	-0.736495	-0.285806	-0.217903	0.168965	0.488885	0.183985	-0.963814	0.169088	-0.530999	0.0412287	-0.160151	0.0506316	0.805061	0.924474	1.47257	0.136884	-0.410712	0.0767619	0.143002	0.697131	-0.0168138	0.09715	-0.0488516	0.0934054	240341	2	0.753302	0.00748042	0.0169573	0.280084	-0.200935	1.20171	1.06161	0.664962	0.843719	0.827607	0.0306587	0.796507	0.176481	Q8K097	Q8K097	Protein lifeguard 2
-0.708972	-0.408423	-0.873475	-0.669903	-0.713615	-0.564531	-0.695785	0.623249	-0.874382	-0.721344	-0.687217	-0.287298	1.007	-0.845967	-0.700879	-0.870261	-0.80488	0.624724	-0.812932	3.16046	-0.532658	1.13499	0.892442	-0.736911	-0.721021	-0.655718	-0.601258	0.548506	1.32735	-0.841932	2.00164	4.00901	53597.4	3	0.763144	0.185108	-0.28024	0.071833	0.177528	0.730826	1.01408	1.03576	1.47184	0.925774	0.0307475	0.678439	0.172527	O88958	O88958	Glucosamine-6-phosphate isomerase 1
-0.0254458	-0.15951	0.711142	0.346385	0.14735	-0.0313713	0.180423	0.0375361	-0.0644574	0.441279	-0.0748812	-0.2983	0.000206247	-0.0931257	0.19062	0.178848	0.0467577	0.303662	-0.193837	-0.317291	0.109513	-0.103255	-0.160364	-0.37647	-0.248798	0.0823536	-0.272674	0.233354	-0.360534	-0.0287155	0.143719	-0.344118	74926.6	4	0.856276	0.443955	-0.150591	0.0494242	-0.0253991	1.18361	-0.339363	0.619682	-0.214171	0.475914	0.0309108	0.611263	0.139227	Q8CI61	Q8CI61	BAG family molecular chaperone regulator 4
-0.292367	0.4185	0.85625	0.112062	-0.290618	0.17844	0.0921995	-0.0812983	-0.0208365	0.423074	0.386479	0.34468	0.304427	0.043285	-0.264697	-0.0198198	-0.520024	-0.0239269	-0.808542	0.304996	0.0896582	-0.701338	-0.0201657	0.282856	-0.285536	-0.391641	-0.099921	-0.683623	-0.228184	0.875603	0.293123	-0.273094	49187.9	4	0.797672	0.129652	0.0689894	0.201864	0.226811	0.870969	-0.647727	0.933714	-0.489906	0.560495	0.0313897	0.755603	0.159341	Q9Z103	Q9Z103	Activity-dependent neuroprotector homeobox protein
-0.126244	-0.24911	-0.387413	-0.320207	-0.611605	0.361762	0.12416	-0.281857	-0.612482	-0.394718	-0.266412	-0.569932	0.658799	-0.470284	-0.148226	0.0692198	-0.554347	0.00763214	0.833869	0.620897	0.0776025	0.161713	-0.17643	0.210177	0.288288	-0.436251	-0.154518	-0.439004	0.382498	2.29886	0.0138444	0.0897128	15891.2	2	0.74208	NaN	0	NaN	0	NaN	0	NaN	0	0.813492	0.0319307	0.789846	0.1811	Q8BPA8	Q8BPA8	Protein DPCD
0.372312	0.823798	-0.115142	2.49717	0.0668391	1.31346	0.64671	-0.321962	-0.767632	-0.555168	0.0301736	-0.830538	-0.567193	0.422632	0.517574	-0.250944	0.288873	-0.902525	1.04153	-0.615024	1.12164	-0.809043	-0.88893	-0.901095	-0.863952	1.10003	-0.89221	0.949924	-0.0322744	-0.118035	-0.837253	-0.923739	93003.7	4	1.18271	1.76618	-1.34033	0.0236978	0.0666952	1.69046	-1.94596	0.286006	-0.53893	0.257311	0.0320662	0.211933	0.065659	Q8BR63	Q8BR63	Protein FAM177A1
0.0329919	-0.159465	0.36361	0.145113	0.71712	0.574612	0.20228	-0.0701956	0.0830999	-0.0210244	-0.0135468	0.0127137	-0.21079	-0.320657	0.246266	0.0220651	-0.0265277	0.0909762	-0.210311	-0.160223	-0.199205	-0.0931463	-0.160442	-0.6169	0.209558	0.0540684	-0.485817	0.465841	0.0561217	-0.114222	-0.241756	-0.172207	50151.4	8	1.2923	1.15562	-0.312755	0.457499	0.222274	1.87107	-0.579835	0.088083	-0.0448066	0.7483	0.0334148	0.065595	0.0510158	O54865	O54865	Guanylate cyclase soluble subunit beta-1
-0.0775662	0.569293	0.429323	1.32406	1.36869	0.189467	0.203898	-0.442813	0.0793764	0.0709827	0.323697	0.327788	-0.737978	-0.369295	-0.410319	0.266543	0.499494	-0.817558	-0.606163	-0.214994	-0.427651	-0.725145	0.023611	-0.695982	-0.179884	0.162937	-0.241711	0.435647	-0.42444	-0.21301	0.443209	-0.133516	80660.5	5	1.8939	0.960582	-0.647442	1.35989	0.893767	2.152	-1.38749	0.184699	0.153718	0.659527	0.0339145	0.00946536	0.0127674	Q922B1	Q922B1	O-acetyl-ADP-ribose deacetylase MACROD1
-0.585191	-0.192404	-0.430752	-0.238735	-0.218884	0.0895214	0.454203	0.567092	-0.186561	-0.0276965	0.0923801	0.0365156	-0.243836	-0.273626	-0.528844	-0.310142	-0.486646	-0.0210377	-0.168235	0.97249	0.408799	0.242166	-0.257997	0.067554	0.0612553	-0.0784389	0.361358	0.331569	0.0537573	0.199209	0.296718	0.0144379	15798.3	2	0.803815	NaN	0	NaN	0	NaN	0	NaN	0	0.845283	0.0340093	0.440996	0.157103	Q9Z329	Q9Z329	Inositol 1,4,5-trisphosphate receptor type 2
-0.30273	0.0421111	0.0250131	-0.262545	-0.202034	-0.0151476	-0.104853	-0.211672	-0.162032	-0.0305758	0.080602	0.167445	0.0732851	0.12442	-0.317363	-0.109704	-0.297847	0.0586527	-0.0799615	-0.0308142	0.136668	-0.023816	0.315046	0.422088	-0.0951511	-0.00528635	0.314567	0.299618	-0.225303	0.0522117	0.161719	0.20339	1.25745e+06	14	0.946974	0.694486	0.162888	0.113442	0.0436771	1.16821	0.271856	0.573766	0.152644	0.287529	0.034087	0.536581	0.112986	Q9Z1S5	Q9Z1S5	Neuronal-specific septin-3
0.0822933	-0.0659393	-0.0221899	0.121339	0.107488	-0.373244	0.71295	-0.0431524	-0.0171443	0.196526	-0.0102411	0.264021	0.0815781	0.085931	0.272485	-0.0255761	0.0385872	-0.136038	0.521352	-0.0926186	-0.244577	-0.286349	-0.40022	-0.103863	0.0332227	-0.017243	-0.241445	0.14948	0.125405	-0.247633	-0.196871	-0.268311	909717	5	0.762613	0.267193	0.0955968	0.0793144	0.036948	0.557132	-0.226612	1.62468	-0.285261	0.568764	0.0341595	0.800456	0.172738	Q9CR62	Q9CR62	Mitochondrial 2-oxoglutarate/malate carrier protein
-0.18951	0.0918791	-0.169501	-0.388098	-0.146053	-0.207463	-0.246703	-0.120825	0.393502	-0.241209	0.0805787	0.129634	0.0391431	0.0350312	-0.0658606	-0.127772	-0.251974	-0.05869	-0.0497912	0.253403	0.283487	0.335582	0.372837	0.41885	-0.00189458	-0.0273462	0.181626	-0.24228	-0.130692	-0.0401677	-0.00192889	0.0922068	578736	24	1.98834	1.60011	0.31104	0.926601	-0.228058	2.26764	0.474513	0.232896	-0.064585	0.657012	0.0349025	0.0069106	0.0102721	P27546	P27546	Microtubule-associated protein 4
0.44429	-0.257246	0.545943	1.01649	0.361817	0.475053	0.596905	1.06038	0.952008	1.4263	-0.969367	-0.14634	-0.945613	-0.973484	1.41975	-0.970891	1.95324	-0.960543	1.22559	-0.951428	-0.977386	-0.951831	-0.969504	-0.973178	0.479516	1.27003	-0.975988	1.0877	-0.382049	-0.969859	-0.972657	-0.967648	549024	3	1.37721	1.45799	-2.59307	0.285719	0.993662	2.63592	-3.85938	0.0641339	-0.272643	0.398248	0.0349701	0.0645993	0.0419552	Q9Z0H4	Q9Z0H4	CUGBP Elav-like family member 2
0.324711	0.212242	-0.610875	-0.838618	0.0170784	-0.81826	-0.551801	-0.48885	0.21878	-0.888315	0.331578	0.415117	0.375544	0.14766	-0.192521	0.125484	-0.181318	0.0400272	0.231928	0.24954	-0.23879	0.0439188	0.0969406	1.1176	0.4702	-0.38993	0.505253	0.0204699	-0.151344	0.320518	0.0103252	0.0757099	69895.3	6	1.18326	0.693638	0.803641	0.113344	-0.06598	1.65784	1.14325	0.249503	0.273627	0.259213	0.0352956	0.185419	0.0655751	Q9WUA6	Q9WUA6	RAC-gamma serine/threonine-protein kinase
-0.492525	-0.448485	-0.168356	0.063965	-0.25246	-0.615727	0.0101083	-0.215088	-0.309201	0.499985	-0.148357	-0.286441	-0.285855	-0.0665781	0.685477	-0.283133	0.138424	0.00884647	0.451123	0.162076	1.25921	0.870032	0.516922	-0.0782203	-0.260374	-0.21399	0.796006	-0.379248	-0.491991	-0.051198	-0.15701	-0.257936	14446.2	3	2.29456	0.841822	0.396078	1.99837	-0.733933	2.87486	0.958029	0.281846	-0.171982	0.349973	0.0353345	0.0035887	0.00507508	P59823	P59823	Interleukin-1 receptor accessory protein-like 1
0.650571	-0.102732	-0.358614	-0.529611	0.878214	-0.0713764	0.372767	0.965972	0.124772	-0.290161	0.0638472	-0.0510685	-0.228303	-0.062093	0.913271	0.416588	0.0674807	-0.209334	-0.0672828	-0.715976	-0.298245	-0.0774069	-0.479135	-0.44929	0.361926	0.693241	-0.708579	0.304266	-0.3634	-0.283519	-0.251967	-0.214822	86715.4	3	0.826511	0.0594925	-0.0514594	0.400089	0.312435	1.2226	-0.707816	0.506801	-0.343922	0.587994	0.0355503	0.451145	0.149104	P22723;Q9R0Y8	P22723	Gamma-aminobutyric acid receptor subunit gamma-2
-0.518144	-0.402341	-0.620253	-0.484016	-0.692881	-0.556692	-0.808669	-0.716513	0.0266476	1.84005	-0.437157	-0.484554	-0.519253	-0.335769	-0.603938	-0.228333	-0.733	-0.108355	1.81291	-0.305105	0.817508	-0.661244	1.54443	-0.166712	-0.38551	3.46229	-0.563538	-0.774755	-0.392692	1.00267	-0.043481	1.0364	28996.3	8	1.17303	1.65706	0.953774	0.00462962	0.00901985	1.76788	1.3137	0.267141	0.368943	0.217227	0.0357421	0.225733	0.0671379	Q8R3B1	Q8R3B1	1-phosphatidylinositol 4,5-bisphosphate phosphodiesterase delta-1
-0.0610016	-0.00937451	-0.310056	0.0281156	-0.374414	-0.00611723	-0.108397	-0.21635	0.0415338	-0.184013	0.094491	-0.106389	0.156667	0.214338	-0.147597	-0.144309	-0.119039	0.0840432	-0.214384	0.282659	0.191495	0.148576	0.0439919	0.655823	-0.0771755	0.00679835	0.240458	0.0214781	-0.201652	0.0451188	0.112008	-0.0873262	9.76252e+06	16	1.24552	0.873808	0.19636	0.54006	-0.148919	1.58859	0.373693	0.102341	0.0284138	0.797151	0.0362642	0.0693372	0.0568175	P06745;CON__Q3ZBD7	P06745	Glucose-6-phosphate isomerase
-0.264631	-0.151853	0.129319	-0.097099	-0.0572363	0.10957	-0.104317	-0.0817078	-0.402969	0.134405	-0.0571902	-0.0936474	-0.0464296	-0.0458394	-0.212418	-0.185178	-0.449188	0.177036	0.094724	0.0298896	0.305796	0.0949498	0.520363	0.219306	-0.232713	0.13059	0.137946	0.128094	-0.167334	0.333899	-0.0757592	0.179624	220257	9	0.757009	0.318518	-0.0869129	0.140155	-0.065345	0.703306	0.228005	1.04375	0.249573	0.489649	0.0365459	0.92171	0.174981	O35864	O35864	COP9 signalosome complex subunit 5
-0.15532	-0.443121	-0.41387	-0.450132	-0.655708	-0.187594	-0.271669	-0.101642	0.0585361	-0.398912	0.694487	-0.0465484	0.203378	-0.179053	-0.289895	0.212016	0.369073	-0.187777	-0.128324	0.160167	-0.223375	0.677871	-0.134187	-0.0603779	-0.239144	-0.327989	1.98233	-0.109293	0.364547	-0.342522	0.0702347	0.553813	18620	3	1.52415	NaN	0	0.123388	0.0956683	NaN	0	0.197689	0.151641	0.0681752	0.0367833	0.175053	0.0299121	Q8VCF1	Q8VCF1	Soluble calcium-activated nucleotidase 1
-0.0330602	0.0635924	-0.0842305	-0.195657	-0.0990329	-0.123195	-0.170805	-0.133579	-0.0450176	-0.142554	0.0464435	-0.0551523	0.160411	0.241129	-0.128968	-0.103479	-0.0727984	0.129177	-0.0969066	0.156186	0.00460606	0.141191	0.0476035	0.336291	-0.0186178	-0.190798	0.244636	0.0741966	-0.161774	0.0870645	0.143538	-0.0204404	3.62122e+06	16	1.15381	0.904654	0.135329	0.397504	-0.0868807	2.17697	0.253608	0.11676	0.0313988	0.712153	0.0368009	0.0984071	0.070177	P68510	P68510	14-3-3 protein eta
-0.618154	0.268526	-0.422367	-0.630854	-0.366319	0.112997	-0.612844	-0.521925	0.426461	-0.283684	0.291349	0.156585	0.150376	-0.00290199	-0.458309	-0.283567	-0.578516	-0.305808	0.142574	0.445053	0.639086	0.611683	0.754402	0.317277	-0.236253	0.0464308	0.409305	0.217718	-0.644604	-0.200777	0.352753	0.824307	25763.8	3	1.42323	1.46816	0.706867	0.231428	-0.202142	1.79997	0.971635	0.0738034	0.0626261	0.293941	0.0368772	0.0642714	0.0377374	P70452	P70452	Syntaxin-4
-0.412547	0.82418	-0.138385	-0.289039	-0.252788	0.457194	0.168851	-0.792067	-0.334505	-0.587477	-0.197478	-0.284312	0.568414	-0.54754	-0.538562	-0.125711	-0.258482	-0.274295	-0.249588	-0.31391	0.23556	0.845725	-0.0901338	0.0227362	0.411282	-0.138985	0.0686826	0.813653	0.0152815	-0.385176	1.02682	0.752601	22325.1	2	0.95383	0.251201	-0.243024	0.762982	0.393868	0.240962	0.219866	1.8257	0.856758	0.761123	0.0369304	0.205502	0.111217	Q91WD9	Q91WD9	Secretagogin
0.119639	1.19563	-0.664267	-0.282947	-0.370825	-0.0400106	-0.222552	0.224624	0.654249	-0.0514577	1.0346	-0.331852	0.616662	0.553079	-0.0122645	0.532985	-0.446618	-0.226866	0.283053	-0.304268	0.226735	-0.310686	-0.381388	0.106951	0.265264	-0.502176	0.131308	-0.639107	-0.210439	-0.645494	0.14614	-0.447705	20964.8	2	1.26825	0.943991	0.571831	0.420685	-0.284875	0.0889228	-0.077739	1.8927	-0.934444	0.539587	0.0369647	0.0742791	0.0539202	P55284	P55284	Cadherin-5
0.576214	0.0813859	0.0224477	-0.742785	1.21981	0.576838	1.01848	0.7054	0.682671	0.892629	-0.644024	-0.411469	-0.438183	-0.353809	0.95474	-0.216375	-0.328718	-0.684154	-0.651617	0.037274	0.195275	0.249682	-0.555332	-0.506915	-0.806129	0.510821	0.092395	-0.742528	0.734964	-0.429399	-0.734764	-0.304826	36869.4	4	0.827157	0.476743	-0.482958	0.0652393	-0.0923375	1.3049	-0.968728	0.514712	-0.578108	0.422176	0.036995	0.58458	0.148882	Q9Z2W9	Q9Z2W9	Glutamate receptor 3
-0.500334	0.482151	0.771962	0.588234	-0.315467	0.793399	-0.0488013	-0.0893656	0.745031	0.854765	-0.49663	0.231497	-0.583782	0.223424	0.41499	-0.0463225	0.0300494	0.691637	0.214816	-0.57225	-0.34357	-0.273317	0.0919507	-0.558842	-0.42778	-0.025086	-0.503396	-0.591406	-0.365928	0.165107	-0.651131	0.0943961	29853.9	4	0.822613	0.0855339	-0.0856071	0.468246	-0.338016	0.616424	-0.426632	1.0741	-0.679041	0.409028	0.037202	0.621388	0.150448	Q66L44	Q66L44	Protein Dos
0.044617	0.0324208	0.40971	0.297568	0.529271	-0.00146036	0.296688	0.159463	-0.340279	0.389407	0.231124	-0.309162	-0.0820479	-0.165652	0.393869	-0.195763	0.0654862	0.498533	-0.263274	-0.397784	-0.0290562	0.00866063	0.214151	-0.228387	-0.178664	-0.287161	-0.614659	-0.189036	-0.618996	0.246588	0.0886187	-0.00479211	159082	7	1.37723	1.17292	-0.344806	0.654304	-0.348422	1.23609	-0.350103	0.659152	-0.353719	0.040721	0.037956	0.99115	0.041954	P97355	P97355	Spermine synthase
-0.14279	0.0262182	0.100184	-0.761129	-0.412786	0.87859	-0.34826	-0.365052	-0.12798	-0.181532	-0.29083	-0.29603	0.394495	0.289011	-0.508702	-0.267687	-0.0107757	-0.134906	-0.154958	0.658076	-0.302401	-0.157175	-0.205633	0.350575	0.485339	-0.271864	0.503538	0.441718	-0.0192998	0.488152	-0.0953547	0.439246	46926.7	6	0.8918	0.158026	0.14083	0.828076	0.319779	0.502216	0.355167	1.47067	0.534117	0.269986	0.0384202	0.66531	0.128292	Q8R4C2	Q8R4C2	RUN and FYVE domain-containing protein 2
-0.161543	0.205822	-0.330563	-0.658947	-0.177676	-0.0876617	-0.409758	-0.315046	0.0921766	-0.460958	-0.085147	0.164397	0.227887	0.57181	-0.384799	-0.121636	-0.307739	0.144801	-0.266267	0.720237	-0.284251	0.143282	0.0806946	0.95417	-0.0847671	-0.0793107	0.619404	0.244778	-0.0208991	-0.110058	-0.00134805	0.178917	210744	11	1.08121	0.82897	0.402963	0.002166	0.00144196	1.25701	0.578232	0.381016	0.17671	0.254735	0.0385901	0.25806	0.0829453	P60122	P60122	RuvB-like 1
-0.260619	-0.0859745	-0.140104	-0.284651	0.0670221	-0.0128125	-0.228898	-0.175758	-0.0592019	0.0106356	-0.0619169	0.199008	0.268516	0.164445	-0.110742	-0.250493	-0.260162	0.116711	0.00317422	0.234839	0.0942528	0.117853	0.11265	0.392532	-0.0869395	-0.00953906	0.271713	0.114655	-0.159264	0.084838	-0.12541	0.0596375	394059	7	1.43954	1.25304	0.239944	0.414221	-0.105005	1.99644	0.350131	0.0156896	0.0051825	0.418196	0.0391774	0.0448143	0.0363466	Q9QZB7	Q9QZB7	Actin-related protein 10
-0.231663	0.424489	1.1669	0.00905028	0.162421	0.268963	0.0499867	0.0543337	0.0407395	0.26843	0.376326	0.255465	-0.230366	-0.0754892	0.0807218	-0.116634	-0.361962	0.522014	0.0174401	-0.933233	0.250127	0.111552	0.529526	-0.0110836	-0.964489	-0.397273	-0.190059	-0.0607894	-0.968424	0.106728	0.120341	-0.274085	524483	6	1.02949	0.415086	-0.166823	0.53654	-1.02839	0.535978	-0.602099	1.08585	-1.46366	0.221011	0.0391871	0.374577	0.0934348	P70365	P70365	Nuclear receptor coactivator 1
1.19936	-0.700795	0.523901	-0.267695	-0.128575	0.48237	0.309974	-0.541013	-0.706191	0.159905	0.131649	-0.666929	-0.572752	-0.625421	-0.852833	-0.184972	0.363307	-0.297325	-0.0366043	0.65783	-0.514711	0.256471	0.283308	-0.311539	-0.206894	0.565262	-0.479458	1.87402	0.146288	0.104229	0.151961	-0.116121	35250.3	4	1.49789	1.14738	-0.981721	0.240526	0.192253	0.05941	0.0663942	1.8209	1.24037	0.201874	0.0392085	0.062077	0.031777	Q8R2R9	Q8R2R9	AP-3 complex subunit mu-2
-0.39283	-0.231683	-0.0663226	-0.23199	0.492421	0.353605	0.0621274	0.0140569	-0.70442	-0.204464	-0.1816	-0.0428316	0.0038552	-0.728068	-0.193884	-0.0262283	-0.37599	0.453369	-0.162345	-0.152546	0.455143	0.820705	0.265322	0.195027	-0.175801	0.581061	-0.186274	-0.0606892	-0.0755886	0.549463	-0.279576	0.226978	84500.2	8	1.24168	0.934228	-0.525597	0.224067	-0.129029	0.449548	0.228148	1.17737	0.624716	0.10802	0.0392268	0.323135	0.057322	Q8R3Q2	Q8R3Q2	Serine/threonine-protein phosphatase 6 regulatory subunit 2
0.262674	0.268585	-0.76593	-0.15734	-0.272591	-0.181368	-0.4991	-0.477857	-0.583403	0.281666	-0.174104	-0.198752	0.299532	0.139806	0.0770512	-0.185774	0.711722	0.376572	0.0268612	0.432373	-0.155378	0.664252	0.0441763	0.348792	-0.57287	0.357157	0.221252	-0.143674	-0.220542	0.189514	0.177844	-0.291145	29049.7	4	1.3684	0.589546	0.402686	1.23303	-0.483739	1.90659	0.890436	0.00501364	0.00401127	0.846202	0.0394485	0.041118	0.0428152	Q9DBR2	Q9DBR2	Protein FAM13C
-0.42518	0.00182149	-0.461051	-0.0812309	-0.0427859	0.0283245	-0.102835	-0.196836	-0.116695	0.0209647	0.173028	0.172463	0.146188	0.184609	-0.262619	-0.39265	-0.230721	-0.0454499	0.114334	0.495712	-0.185233	0.167023	0.281681	0.273848	-0.151348	-0.0608692	0.47465	0.102754	-0.177038	0.0508988	-0.000549172	0.244793	442973	14	0.981534	0.674494	0.237351	0.14023	-0.0557809	1.44118	0.403973	0.295375	0.110841	0.452727	0.0395595	0.22916	0.104344	Q91WC3	Q91WC3	Long-chain-fatty-acid--CoA ligase 6
-0.0253982	0.21485	-0.218741	-0.327856	-0.417933	-0.172352	-0.53868	-0.319548	0.137479	-0.205828	0.235032	-0.0467924	0.0461917	0.303888	-0.359497	-0.17204	-0.285553	-0.0142513	-0.18208	0.979874	0.0429712	-0.00916344	0.141598	0.616593	-0.279703	-0.0552398	0.295164	-0.316259	0.0605229	0.539532	-0.101039	0.434259	288867	17	1.16922	1.12236	0.379066	0.166992	-0.0972271	1.55902	0.566492	0.182697	0.090199	0.362098	0.0395859	0.128639	0.0677296	Q3URD3	Q3URD3	Sarcolemmal membrane-associated protein
-0.0534906	0.427005	-0.38388	-0.474149	-0.411688	-0.305471	-0.218845	-0.0715668	0.310398	-0.496245	-0.413369	-0.125648	-0.222533	0.283928	-0.237197	-0.65084	0.628099	-0.14737	-0.420861	0.305731	-0.13773	-0.0655265	-0.15607	1.5847	-0.243232	0.113457	1.22419	0.598889	0.293235	0.313579	-0.244695	-0.602801	17790.7	2	0.653612	NaN	0	NaN	0	NaN	0	NaN	0	0.829769	0.0404462	0.945548	0.222018	Q9R087	Q9R087	Glypican-6;Secreted glypican-6
-0.255637	0.0437261	0.0376544	-0.584337	-0.224753	-0.512928	-0.246888	-0.215315	-0.0230074	-0.335728	-0.061866	-0.0352613	0.301083	0.420807	-0.258865	-0.416454	-0.330595	0.639168	-0.342517	0.773821	-0.145546	-0.203834	-0.00134207	-0.0841933	-0.0063926	1.30521	0.799627	-0.0987932	-0.243576	0.159475	0.40836	-0.261101	36233.6	4	1.06406	0.767847	0.33135	0.428943	0.261285	0.940684	0.426563	0.708854	0.356498	0.115422	0.0406143	0.84906	0.0862863	Q8VHK9	Q8VHK9	ATP-dependent RNA helicase DHX36
-0.191286	-0.102498	-0.222371	-0.0548499	-0.0810432	-0.261776	0.00812924	-0.15789	-0.00049962	-0.0708743	-0.462	-0.379607	-0.0778851	0.25993	-0.217787	-0.385732	1.05551	-0.323716	0.10539	0.849237	-0.252069	-0.337544	0.237511	1.00408	-0.166788	-0.239127	0.274259	-0.034127	0.061286	-0.194753	0.669544	-0.310657	259610	9	0.889569	0.28236	-0.10354	0.441772	-0.273229	0.977006	0.438316	0.649052	0.268627	0.262977	0.0409065	0.610943	0.128953	O08919	O08919	Numb-like protein
-0.857078	1.0997	0.675487	-0.624982	0.820932	0.540043	0.993948	-0.757996	0.584282	0.678365	1.3365	-0.0557188	0.778359	-0.617257	1.15788	-0.861604	-0.869974	-0.815747	0.713514	-0.808146	-0.865172	-0.703538	0.533527	-0.760073	1.19409	-0.462343	-0.236524	-0.858505	-0.375569	0.844717	-0.830807	-0.590306	66004.7	4	0.849777	0.143862	0.278065	0.542202	0.807115	1.03607	-1.38815	0.602423	-0.859096	0.309891	0.0410617	0.618067	0.141326	Q3TC93	Q3TC93	HCLS1-binding protein 3
-0.68264	1.39768	-0.274244	-0.333262	2.79675	-0.730965	-0.348282	0.599853	-0.673509	1.86594	0.212901	-0.0884655	-0.305112	0.559874	2.43462	-0.599941	-0.469711	-0.231278	-0.544836	-0.645612	-0.461804	-0.602952	-0.257396	0.434909	-0.706858	0.543847	-0.118246	-0.629541	-0.575456	-0.676801	-0.338057	-0.551403	28513.8	4	0.686695	0.149883	0.246775	0.178263	-0.164208	0.544488	-0.588877	1.11899	-0.99986	0.912423	0.0416092	0.585047	0.205733	Q9DC48	Q9DC48	Pre-mRNA-processing factor 17
-0.0837107	-0.0220976	0.0296232	-0.132735	-0.16788	0.112425	-0.199586	-0.171712	-0.253653	-0.0952823	0.042915	0.0316958	0.010506	0.0703594	-0.242316	-0.211392	-0.292747	0.175015	0.00562024	0.0870533	-0.197045	0.379322	0.351761	0.0554263	-0.13938	-0.0271024	0.411457	0.0501095	-0.290363	0.431707	0.11477	0.167235	255793	11	0.639543	0.0287808	-0.00807166	0.0509353	0.0240953	0.77262	0.193451	0.85234	0.225618	0.935599	0.0418891	0.871164	0.229328	Q9CZ30	Q9CZ30	Obg-like ATPase 1
-0.265583	0.235613	-0.480387	0.00446675	-0.0699254	-0.125465	-0.160984	-0.141576	-0.179867	-0.531578	0.208122	0.157368	0.0337983	0.224757	-0.427357	-0.321357	-0.163114	0.0711846	-0.0738948	1.04422	-0.123364	0.0191476	-0.0176844	0.930309	0.106032	-0.32661	0.212587	0.229807	-0.244162	0.051368	0.0209574	0.103171	342639	6	0.750931	0.013295	-0.00875831	0.419961	-0.191523	1.11785	0.421654	0.531849	0.238889	0.524337	0.0424175	0.561007	0.177447	Q8BHG2	Q8BHG2	UPF0587 protein C1orf123 homolog
-0.237453	-0.281226	0.154443	-0.210185	-0.0315688	-0.077669	-0.420109	-0.162778	0.194454	0.387055	-0.379487	-0.26998	0.0584894	0.0604364	-0.25901	-0.371127	-0.3412	0.0760625	0.850305	-0.0257579	-0.165031	0.152802	0.775735	0.000656225	-0.245246	0.298915	0.0355788	0.0430026	-0.283784	0.670801	0.00664051	-0.00376451	35965.4	3	0.705803	0.235375	0.107131	0.172119	-0.0978017	1.18573	0.416774	0.481336	0.211841	0.975061	0.0425123	0.494087	0.196878	Q9D2N9	Q9D2N9	Vacuolar protein sorting-associated protein 33A
-0.22438	-0.55034	-0.134906	0.183157	0.00951198	-0.0935653	-0.186261	-0.442805	0.869477	-0.356827	-0.23388	-0.310049	-0.0794171	-0.253006	-0.246773	-0.143074	0.0587799	-0.580941	0.578788	-0.381649	0.679037	-0.106774	0.449294	0.533928	-0.00713905	0.35192	0.413364	0.426759	0.0818562	-0.117776	-0.0709581	-0.115352	15994.9	3	0.673246	NaN	0	NaN	0	NaN	0	NaN	0	0.614427	0.0425204	0.898978	0.212204	Q8CI75	Q8CI75	DIS3-like exonuclease 2
-0.144373	-0.0277821	-0.171626	-0.390483	-0.129203	-0.00692008	-0.196627	-0.0625611	0.102541	-0.0656272	-0.0738501	0.148105	-0.0474442	0.0427721	0.0761676	-0.0681796	-0.317409	-0.0220687	-0.0686833	0.146176	-0.0799618	0.258637	0.385896	0.180054	-0.0833916	0.0387626	0.360487	0.0694136	-0.12173	0.0965371	-0.0677175	0.24009	932754	14	1.34139	1.81581	0.249496	0.0634497	0.0240989	1.24201	0.287818	0.304971	0.0624201	0.108675	0.0428889	0.18308	0.0455626	Q9CWZ7	Q9CWZ7	Gamma-soluble NSF attachment protein
-0.340855	-0.0546271	0.0124145	-0.210803	-0.157143	0.00259242	-0.0480652	-0.0865831	-0.230276	-0.0719137	0.0756396	0.00726772	0.17837	0.0467734	-0.0820798	-0.0604186	-0.352909	0.124325	-0.104899	0.0866641	0.24983	0.171035	0.335232	0.157996	-0.215564	0.0739671	0.101419	0.00109175	-0.0402581	0.17155	0.139851	0.120378	2.33136e+06	14	0.870735	0.795915	0.1463	0.0908104	-0.0329728	1.11715	0.266264	0.434734	0.0869906	0.504469	0.0441335	0.293906	0.134668	P63005	P63005	Platelet-activating factor acetylhydrolase IB subunit alpha
1.3815	0.968131	0.0824239	0.058716	-0.19778	-0.193824	0.319937	-0.3629	-0.030089	-0.2141	0.0500303	-0.229639	-0.0965673	0.827054	0.147137	-0.194142	-0.148858	-0.190848	-0.577077	-0.0130781	-0.315481	0.269515	0.357813	-0.0261334	-0.616152	-0.258547	0.451788	-0.349979	0.020844	-0.397101	-0.429509	-0.0930824	17459	4	0.825725	0.329519	-0.204319	0.399256	-0.243682	0.678227	-0.393078	0.960036	-0.432441	0.262508	0.0441922	0.920684	0.149374	Q9JI18	Q9JI18	Low-density lipoprotein receptor-related protein 1B
-0.193353	-0.0236657	0.331618	0.157144	0.182233	-0.0832501	0.16134	0.010012	-0.00513712	0.804889	0.0234727	-0.13543	-0.000462184	-0.24342	0.314582	0.20217	-0.0912482	-0.336852	1.0668	0.0628675	-0.274649	0.0711736	-0.234156	-0.535656	-0.0103752	-0.256514	-0.58851	0.192653	0.00178948	-0.0941199	-0.179471	-0.296472	355124	7	0.662987	0.0870002	0.0374587	0.170303	-0.118918	0.529522	-0.259554	1.13649	-0.41593	0.801566	0.0444923	0.630004	0.217277	Q9DCD0	Q9DCD0	6-phosphogluconate dehydrogenase, decarboxylating
-0.430614	-0.0979265	0.590325	0.424072	0.266132	-0.403346	0.226631	0.108555	0.133129	0.806455	0.436267	-0.07851	0.306057	-0.246583	-0.000844124	0.0276134	0.147813	0.363092	1.0474	-0.878036	0.31613	-0.531167	-0.317514	-0.157935	-0.42866	0.154488	-0.89114	-0.0120081	-0.875748	0.502041	0.271774	-0.777943	164809	6	0.865635	0.263061	0.149467	0.42639	-0.651438	0.356549	-0.388562	1.25705	-1.18947	0.508921	0.0445435	0.294846	0.136259	P21981	P21981	Protein-glutamine gamma-glutamyltransferase 2
-0.477473	-0.603896	-0.677108	-0.313043	-0.372814	-0.077602	-0.0797683	0.0148042	0.176602	-0.487945	-0.283931	-0.0523035	-0.204166	-0.545603	0.150875	-0.495034	0.013633	0.127303	-0.102422	-0.187343	0.202738	-0.0934648	3.65549	-0.347876	-0.0392167	-0.352337	-0.0427244	2.26168	-0.403188	0.375712	-0.0391018	-0.700473	24289.6	2	0.776305	NaN	0	0.30101	-0.323398	1.40709	0.849688	0.333548	0.302218	0.857542	0.0447666	0.326561	0.167377	Q80U30	Q80U30	Protein CLEC16A
0.441059	-0.250075	-0.346053	0.0732672	-0.383466	-0.297043	-0.0142118	-0.496139	-0.316838	-0.419943	-0.0685667	-0.464296	0.119172	-0.15059	0.318316	-0.0982413	-0.0565849	0.233805	-0.304272	0.0616351	0.401232	0.119579	-0.419734	0.0992612	0.834924	-0.18449	1.40632	-0.305747	0.373372	-0.355611	-0.0198415	0.469796	17363.8	2	0.748369	0.0892845	0.0565832	NaN	0	0.668028	0.299691	0.916307	0.479277	0.436608	0.044861	0.632047	0.178497	Q6KCD5	Q6KCD5	Nipped-B-like protein
-0.315094	0.10629	-0.0821392	-0.142541	-0.221333	0.205041	-0.244607	-0.149486	-0.0668903	-0.308046	-0.100249	0.256092	-0.0202715	0.11128	-0.182844	-0.0930258	-0.268719	0.0365015	-0.115742	0.241716	0.0618002	0.313458	0.527744	0.16575	-0.108764	-0.134062	0.336837	0.046761	-0.276361	0.253579	0.00865633	0.158667	286579	11	0.753338	0.285014	0.0889797	0.291454	-0.106546	1.2311	0.315447	0.392058	0.119921	0.933126	0.0450106	0.354036	0.176467	Q8VDM4	Q8VDM4	26S proteasome non-ATPase regulatory subunit 2
-0.0765757	0.20701	0.0001723	-0.490854	-0.0215608	-0.183863	-0.15968	-0.309517	-0.0407478	-0.121587	0.0529207	-0.0746875	0.0184637	0.163521	-0.188999	-0.0139967	0.022553	0.0428311	0.135139	0.273591	0.303699	0.0500931	0.500425	0.293448	-0.248449	-0.132722	0.174096	0.264528	-0.348668	-0.0813016	0.219203	-0.228485	926670	9	1.82974	0.69786	0.195583	1.60117	-0.363836	2.25619	0.495143	0.186288	-0.0642755	0.419858	0.0451843	0.0110317	0.0147998	P50518;Q9D593	P50518	V-type proton ATPase subunit E 1
-0.833213	0.993794	-0.817139	-0.80676	-0.513454	-0.860196	-0.784773	-0.289503	0.138332	-0.762423	-0.794952	-0.815141	0.872856	-0.152845	-0.464855	0.319515	-0.904836	-0.407725	-0.845974	2.45447	1.13534	0.735303	1.44224	0.742974	0.132437	-0.0880629	1.01328	0.38508	0.090628	-0.825121	-0.512319	1.02303	62594.2	3	0.805928	0.625277	0.819253	0.0104995	0.024506	1.01767	1.48977	0.546689	0.695025	0.424982	0.0452043	0.452081	0.156341	Q9D6S7	Q9D6S7	Ribosome-recycling factor, mitochondrial
-0.471097	-0.151878	0.247932	-0.772417	-0.0408997	0.0129998	0.0292283	-0.0925074	-0.0221198	0.0895235	-0.271174	0.108119	0.0088219	-0.271137	-0.0110668	-0.141675	-0.0644858	0.215031	0.105752	0.154624	-0.283263	0.669589	0.450775	0.150373	-0.122784	-0.0302898	0.0281566	0.180058	-0.380258	0.212554	0.0948466	0.368669	27050.4	3	0.8878	0.444614	0.276974	0.423096	-0.164796	1.09191	0.580986	0.430828	0.139215	0.746496	0.0452436	0.209084	0.129479	Q8CIV8	Q8CIV8	Tubulin-specific chaperone E
-0.374297	-0.175011	0.206298	0.286071	-0.410999	-0.451234	-0.53812	-0.496517	-0.570142	-0.36223	0.202996	-0.033617	0.295061	-0.32555	-0.625439	0.386067	-0.313413	0.0589725	-0.361218	1.44015	0.236764	0.25458	-0.0790311	-0.375234	-0.066941	-0.250485	1.46292	0.48469	0.446003	0.172476	-0.605097	0.481524	18774.8	3	0.678914	0.19719	0.157956	0.18236	0.165744	0.920705	0.508896	0.706883	0.516684	0.513775	0.0452962	0.987417	0.209453	Q8R527	Q8R527	Rho-related GTP-binding protein RhoQ
-0.0354742	-0.0849527	0.07695	-0.437075	0.116016	0.219358	-0.125585	-0.142808	-0.288709	0.0183101	-0.368533	0.0274707	-0.149463	0.00500098	-0.491542	-0.252446	-0.111572	-0.430718	-0.240475	0.0690428	0.00398372	0.120869	0.634606	0.300231	-0.053011	0.387288	0.536899	0.314949	-0.279079	0.301562	-0.33966	0.698568	127731	9	0.911183	0.664533	-0.229709	0.344313	0.188547	0.212745	0.10597	1.48096	0.524227	0.892469	0.0459604	0.176639	0.122692	Q6NZJ6	Q6NZJ6	Eukaryotic translation initiation factor 4 gamma 1
-0.516753	-0.567521	0.248387	-0.406832	-0.110089	0.3752	-0.29053	-0.319871	-0.459606	-0.102317	-0.36098	0.16297	-0.255575	0.136558	-0.301717	-0.362185	-0.626654	1.53693	-0.228726	1.06301	-0.444864	-0.200211	0.419018	0.658738	0.447018	-0.0443126	0.854963	-0.272064	-0.140504	-0.0145213	-0.23186	0.354902	16301.5	2	0.61266	NaN	0	NaN	0	NaN	0	NaN	0	0.864463	0.0459605	0.891446	0.243972	Q9CZ62	Q9CZ62	Centrosomal protein of 97 kDa
-0.21015	-0.150807	-0.0274949	-0.0279821	-0.184413	-0.0437543	-0.0527835	-0.125388	0.0251799	0.0415506	-0.0820232	-0.0664009	-0.0565104	-0.203294	0.0451287	-0.0256211	0.0778341	0.522231	-0.129996	-0.20867	0.251798	0.0355942	0.024149	-0.166093	-0.269999	0.0447349	0.140999	0.571721	0.00948156	0.0816369	-0.107948	0.267289	533848	6	0.730671	0.84238	0.0967443	0.129541	0.0541143	0.942085	0.201265	0.647931	0.158635	0.390321	0.046633	0.807039	0.185921	Q4VC33	Q4VC33	Macrophage erythroblast attacher
-0.279145	0.181345	0.387563	0.0627198	-0.0960044	0.759697	-0.0656981	0.0756899	0.428053	0.199201	0.0590031	-0.172226	-0.439337	0.291701	0.141227	0.369725	-0.571006	0.374761	-0.357467	0.183574	0.381152	0.546008	-0.656583	-0.583385	-0.717961	-0.646999	-0.212845	-0.745705	0.105717	0.157783	0.403098	0.436341	53816.6	2	0.632912	0.0510335	-0.0300467	0.139412	-0.17676	0.72821	-0.484127	0.840962	-0.630841	0.702923	0.047061	0.786595	0.232856	Q8R0A0	Q8R0A0	General transcription factor IIF subunit 2
-0.194844	0.40074	0.0326367	-0.232274	-0.143991	-0.10162	-0.568716	0.490887	-0.32767	-0.243184	-0.0963682	-0.310335	-0.424927	-0.54913	-0.417878	-0.655642	0.293463	0.164749	-0.0961233	2.30945	-0.147037	0.0808997	0.638852	-0.561489	-0.712461	0.191108	0.232374	-0.48772	0.0381443	0.548361	0.577414	0.272328	17840.5	3	1.13187	1.47879	-0.593187	0.262078	-0.262231	0.458221	0.344463	1.16119	0.675419	0.0940105	0.0481153	0.507923	0.0738122	P42232;P42230	P42232	Signal transducer and activator of transcription 5B
-0.806328	1.69573	4.39672	-0.752142	2.25703	1.23156	-0.760338	-0.619362	-0.474181	2.18579	-0.739563	-0.0610262	-0.372823	-0.814063	-0.553892	1.64595	2.23397	-0.593854	-0.689875	-0.752866	-0.684703	-0.688506	-0.668429	-0.632695	-0.553913	-0.401417	-0.602006	-0.787444	-0.566343	-0.617598	-0.803709	-0.649665	43791.4	3	0.661773	0.173381	-0.379709	0.253332	-0.278094	0.672184	-1.07338	1.00078	-0.971766	0.5118	0.0481931	0.918972	0.217885	Q9CQ02	Q9CQ02	COMM domain-containing protein 4
0.595441	0.301065	0.307478	0.358504	-0.283184	-0.296327	0.189327	0.309615	0.655243	-0.326706	-0.319111	0.543779	-0.368886	-0.35397	-0.112825	0.616679	0.854982	-0.175084	-0.626766	1.04439	-0.369228	-0.102525	-0.0580703	0.0589656	1.23633	-0.625607	-0.458162	-0.536224	-0.749618	-0.677087	-0.201984	-0.43044	43977.8	4	1.39536	0.444424	-0.260015	1.03474	-0.801751	0.378204	-0.26692	1.15642	-0.808656	0.0513969	0.0486327	0.307969	0.0402387	G3X9N3	G3X9N3
0.0571311	0.30934	-0.0837444	-0.833351	-0.776153	-0.0987494	-0.128614	-0.81542	0.404055	-0.826688	0.58426	-0.875789	0.540729	0.458355	-0.745072	0.324475	-0.768701	0.0714251	-0.322903	0.5171	0.0946677	0.366679	-0.0180877	0.301893	0.328173	-0.409057	0.721773	0.0262485	0.449294	0.041302	0.496652	0.608777	61912.9	2	0.718493	0.165705	0.300658	0.588196	0.421462	0.749767	0.768696	0.804847	0.8895	0.376962	0.048645	0.881692	0.191208	P97792	P97792	Coxsackievirus and adenovirus receptor homolog
-0.308679	-0.585601	-0.50017	-0.0594001	0.306965	-0.254841	-0.161167	-0.242813	-0.339038	-0.0107062	-0.174012	-0.160744	0.976274	-0.583239	0.0443115	-0.563516	0.859638	0.0837853	-0.0916711	1.41578	0.13997	0.0512307	0.024163	0.527805	0.366783	0.312131	-0.0570506	-0.271774	0.485758	-0.2222	-0.709274	-0.298695	17612.6	5	1.17845	0.162329	0.128802	1.09312	-0.604617	2.27055	0.829644	0.0971158	0.0962259	0.298694	0.0487538	0.113838	0.0663058	B2RXQ2	B2RXQ2
-0.256182	-0.101172	0.0286158	-0.139777	0.0449736	0.102908	-0.0915961	-0.0444268	-0.164223	-0.0217051	-0.120623	-0.113664	0.0169573	0.205158	0.0441409	0.03272	0.0517554	0.109274	-0.064235	0.160072	0.0442003	0.0706702	0.115579	0.244713	-0.0677444	0.00726295	-0.00867887	-0.141382	-0.013854	0.000242968	-0.0441299	0.114151	1.68119e+06	27	1.36166	0.316802	0.0636258	1.75623	-0.153445	1.85561	0.216514	0.00266797	-0.000556469	0.399358	0.049036	0.0479583	0.0434848	G5E8K5	G5E8K5	Ankyrin-3
-0.0475207	-0.216363	-0.130582	-0.181133	-0.323055	-0.260854	0.137538	-0.330576	-0.414428	-0.1554	-0.435027	-0.0976532	-0.0452191	0.927744	-0.534033	-0.362417	-0.327851	-0.318041	-0.536729	0.00329918	-0.180282	-0.157225	-0.141571	0.406113	0.862656	-0.486262	0.987249	1.04343	0.302949	0.315019	0.659363	0.0368668	15804.3	2	1.80153	0.107546	-0.0692981	1.69961	0.751345	NaN	0	1.55071	0.797069	0.080535	0.0491811	0.0376889	0.0157931	Q9CY57	Q9CY57	Chromatin target of PRMT1 protein
0.789431	0.0817333	-0.373282	0.106773	0.168982	-0.633423	-0.187292	0.154813	0.388512	-0.167398	0.122786	-0.140902	0.592806	0.212558	0.182085	-0.00532122	0.851932	-0.820216	-0.451923	-0.836744	-0.157731	-0.943187	-0.269776	-0.910594	0.569901	-0.0060981	0.389579	0.496044	0.797291	-0.250987	0.13385	0.115798	103038	6	2.91907	0.49369	0.278684	2.11234	1.98214	1.46029	-1.56279	0.338784	0.140671	0.00290672	0.0496161	0.0204181	0.00120485	Q60737	Q60737	Casein kinase II subunit alpha
0.038228	-0.0291697	0.214116	-0.278456	-0.470654	-0.243614	-0.607726	-0.655243	-0.0368588	-0.463836	0.153723	0.0598106	-0.266916	0.210939	-0.387714	0.331035	-0.163458	0.715467	0.955863	-0.192161	-0.386329	0.0399252	-0.30905	0.0127222	-0.0777434	0.429566	0.384764	0.103558	-0.199547	-0.371041	-0.00769355	1.4975	18858.1	2	0.92588	0.736528	0.407016	0.225671	0.16399	0.987533	0.550553	0.548665	0.307527	0.183529	0.0499083	0.566287	0.11861	Q91XB7	Q91XB7	Protein YIF1A
[truncated: 2 more columns]

## Sheet: C1
Protein Ids	protein names	gene names
A0A0N4SVP8	RNA helicase	Eif4a3l2
A0A286YCV9	Kinesin family member 13B	Kif13b
A2AF47	Dedicator of cytokinesis protein 11	Dock11
A2AGT5	Cytoskeleton-associated protein 5	Ckap5
A2AHG0	Leucine zipper putative tumor suppressor 3	Lzts3
B1AWC9	Phosphodiesterase	Pde4b
B2RXQ2	Ppfia1 protein	Ppfia1
E9PV04	RNA helicase	Eif4a3l1
O08919	Numb-like protein	Numbl
O35474	EGF-like repeat and discoidin I-like domain-containing protein 3	Edil3
P02469	Laminin subunit beta-1	Lamb1
P42230	Signal transducer and activator of transcription 5A	Stat5a
P42232	Signal transducer and activator of transcription 5B	Stat5b
P59823	Interleukin-1 receptor accessory protein-like 1	Il1rapl1
P60122	RuvB-like 1	Ruvbl1
P70452	Syntaxin-4	Stx4
Q3URD3	Sarcolemmal membrane-associated protein	Slmap
Q3UVC0	Kinase suppressor of Ras 2	Ksr2
Q52KR3	Protein prune homolog 2	Prune2
Q5ND34	WD repeat-containing protein 81	Wdr81
Q60668	Heterogeneous nuclear ribonucleoprotein D0	Hnrnpd
Q64337	Sequestosome-1	Sqstm1
Q64735	Complement component receptor 1-like protein	Cr1l
Q6IRU2	Tropomyosin alpha-4 chain	Tpm4
Q6KCD5	Nipped-B-like protein	Nipbl
Q6NZJ6	Eukaryotic translation initiation factor 4 gamma 1	Eif4g1
Q6ZPZ3	Zinc finger CCCH domain-containing protein 4	Zc3h4
Q70FJ1	A-kinase anchor protein 9	Akap9
Q80TN4	DnaJ homolog subfamily C member 16	Dnajc16
Q8BGT7	Survival of motor neuron-related-splicing factor 30	Smndc1
Q8BHG2	CXXC motif containing zinc binding protein	Czib
Q8BPA8	Protein DPCD	Dpcd
Q8CCJ3	E3 UFM1-protein ligase 1	Ufl1
Q8CI75	DIS3-like exonuclease 2	Dis3l2
Q8K012	Formin-binding protein 1-like	Fnbp1l
Q8K093	Thyrotropin-releasing hormone-degrading ectoenzyme	Trhde
Q8R3Q2	Serine/threonine-protein phosphatase 6 regulatory subunit 2	Ppp6r2
Q8R4C2	RUN and FYVE domain-containing protein 2	Rufy2
Q8R527	Rho-related GTP-binding protein RhoQ	Rhoq
Q8VCF1	Soluble calcium-activated nucleotidase 1	Cant1
Q8VDS8	Syntaxin-18	Stx18
Q8VHK9	ATP-dependent DNA/RNA helicase DHX36	Dhx36
Q91VC3	Eukaryotic initiation factor 4A-III	Eif4a3
Q91WL8	WW domain-containing oxidoreductase	Wwox
Q91XB7	Protein YIF1A	Yif1a
Q9CR00	26S proteasome non-ATPase regulatory subunit 9	Psmd9
Q9CSH3	Exosome complex exonuclease RRP44	Dis3
Q9CY57	Chromatin target of PRMT1 protein	Chtop
Q9CZ62	Centrosomal protein of 97 kDa	Cep97
Q9D2N9	Vacuolar protein sorting-associated protein 33A	Vps33a
Q9D3A8	Carboxyl-terminal PDZ ligand of neuronal nitric oxide synthase protein	Nos1ap
Q9D4V7	Rab-like protein 3	Rabl3
Q9DBR2	Protein FAM13C	Fam13c
Q9DCC4	Pyrroline-5-carboxylate reductase 3	Pycr3
Q9EPE9	Endoplasmic reticulum transmembrane helix translocase	Atp13a1
Q9ER88	28S ribosomal protein S29, mitochondrial	Dap3
Q9JI46	Diphosphoinositol polyphosphate phosphohydrolase 1	Nudt3
Q9R087	Glypican-6	Gpc6
Q9WUA6	RAC-gamma serine/threonine-protein kinase	Akt3
Q9Z329	Inositol 1,4,5-trisphosphate receptor type 2	Itpr2

## Sheet: C1-terms
GO ID	GO description	cluster frequency	genes
44464	cell part	34/42 80.9%	Q9CZ62 Q8BGT7 Q60668 Q9ER88 Q91WL8 A2AHG0 Q8R4C2 Q9CR00 Q8VDS8 A2AGT5 Q70FJ1 Q8K093 Q9CSH3 Q6KCD5 Q9CY57 Q8R527 Q8K012 Q3UVC0 Q64337 Q3URD3 Q64735 P70452 Q8VCF1 Q6NZJ6 Q9Z329 Q8VHK9 P60122 Q80TN4 Q91XB7 Q9JI46 Q6IRU2 Q9EPE9 Q8CCJ3 Q9WUA6
5623	cell	34/42 80.9%	Q9CZ62 Q8BGT7 Q60668 Q9ER88 Q91WL8 A2AHG0 Q8R4C2 Q9CR00 Q8VDS8 A2AGT5 Q70FJ1 Q8K093 Q9CSH3 Q6KCD5 Q9CY57 Q8R527 Q8K012 Q3UVC0 Q64337 Q3URD3 Q64735 P70452 Q8VCF1 Q6NZJ6 Q9Z329 Q8VHK9 P60122 Q80TN4 Q91XB7 Q9JI46 Q6IRU2 Q9EPE9 Q8CCJ3 Q9WUA6
5488	binding	32/42 76.1%	Q9CZ62 Q8BGT7 Q60668 Q91WL8 A2AHG0 Q8R4C2 Q9CR00 Q8VDS8 Q6ZPZ3 A2AGT5 Q70FJ1 Q8K093 Q9CSH3 Q6KCD5 Q8R527 Q8K012 Q3UVC0 Q64337 Q9D4V7 Q9DCC4 P70452 Q8VCF1 Q6NZJ6 Q9Z329 Q8VHK9 A2AF47 P60122 Q80TN4 Q9JI46 Q6IRU2 Q9EPE9 Q9WUA6
44424	intracellular part	30/42 71.4%	Q9CZ62 Q8BGT7 Q60668 Q9ER88 Q91WL8 A2AHG0 Q8R4C2 Q9CR00 Q8VDS8 A2AGT5 Q70FJ1 Q9CSH3 Q6KCD5 Q9CY57 Q8R527 Q8K012 Q3UVC0 Q64337 Q3URD3 P70452 Q8VCF1 Q6NZJ6 Q9Z329 Q8VHK9 P60122 Q91XB7 Q9JI46 Q6IRU2 Q8CCJ3 Q9WUA6
5622	intracellular	30/42 71.4%	Q9CZ62 Q8BGT7 Q60668 Q9ER88 Q91WL8 A2AHG0 Q8R4C2 Q9CR00 Q8VDS8 A2AGT5 Q70FJ1 Q9CSH3 Q6KCD5 Q9CY57 Q8R527 Q8K012 Q3UVC0 Q64337 Q3URD3 P70452 Q8VCF1 Q6NZJ6 Q9Z329 Q8VHK9 P60122 Q91XB7 Q9JI46 Q6IRU2 Q8CCJ3 Q9WUA6
43229	intracellular organelle	25/42 59.5%	Q9CZ62 Q8BGT7 Q60668 Q9ER88 Q91WL8 A2AHG0 Q8R4C2 Q9CR00 Q8VDS8 A2AGT5 Q70FJ1 Q9CSH3 Q6KCD5 Q9CY57 Q8K012 Q64337 Q3URD3 P70452 Q8VCF1 Q9Z329 Q8VHK9 P60122 Q91XB7 Q6IRU2 Q8CCJ3
43226	organelle	25/42 59.5%	Q9CZ62 Q8BGT7 Q60668 Q9ER88 Q91WL8 A2AHG0 Q8R4C2 Q9CR00 Q8VDS8 A2AGT5 Q70FJ1 Q9CSH3 Q6KCD5 Q9CY57 Q8K012 Q64337 Q3URD3 P70452 Q8VCF1 Q9Z329 Q8VHK9 P60122 Q91XB7 Q6IRU2 Q8CCJ3
5737	cytoplasm	24/42 57.1%	Q9CZ62 Q64337 Q3URD3 Q8BGT7 Q60668 Q9ER88 P70452 Q91WL8 Q8VCF1 A2AHG0 Q6NZJ6 Q9Z329 Q8VDS8 A2AGT5 Q70FJ1 Q91XB7 Q9JI46 Q9CSH3 Q6IRU2 Q8R527 Q8K012 Q8CCJ3 Q3UVC0 Q9WUA6
9987	cellular process	24/42 57.1%	Q64337 Q8BGT7 Q9DCC4 Q60668 Q9ER88 P70452 Q91WL8 Q8VCF1 Q6NZJ6 Q9CR00 Q9Z329 Q8VDS8 A2AGT5 P60122 Q80TN4 Q91XB7 Q9CSH3 Q6KCD5 Q9CY57 Q9EPE9 Q8R527 Q8K012 Q3UVC0 Q9WUA6
43231	intracellular membrane-bounded organelle	19/42 45.2%	Q64337 Q8BGT7 Q60668 Q9ER88 P70452 Q91WL8 Q8VCF1 Q8R4C2 Q9CR00 Q9Z329 Q8VDS8 Q8VHK9 P60122 Q70FJ1 Q91XB7 Q9CSH3 Q6KCD5 Q9CY57 Q8CCJ3
43227	membrane-bounded organelle	19/42 45.2%	Q64337 Q8BGT7 Q60668 Q9ER88 P70452 Q91WL8 Q8VCF1 Q8R4C2 Q9CR00 Q9Z329 Q8VDS8 Q8VHK9 P60122 Q70FJ1 Q91XB7 Q9CSH3 Q6KCD5 Q9CY57 Q8CCJ3
5515	protein binding	17/42 40.4%	Q9CZ62 Q64337 Q9DCC4 Q60668 P70452 Q91WL8 A2AHG0 Q6NZJ6 Q9CR00 Q8VDS8 A2AGT5 A2AF47 Q70FJ1 Q80TN4 Q6IRU2 Q8R527 Q9WUA6
44444	cytoplasmic part	14/42 33.3%	Q64337 Q60668 Q9ER88 P70452 Q91WL8 Q8VCF1 Q6NZJ6 Q9Z329 Q8VDS8 Q70FJ1 Q91XB7 Q6IRU2 Q8K012 Q8CCJ3
43228	non-membrane-bounded organelle	9/42 21.4%	Q9CZ62 Q3URD3 A2AGT5 Q60668 Q70FJ1 Q6IRU2 Q9ER88 A2AHG0 Q8K012
43232	intracellular non-membrane-bounded organelle	9/42 21.4%	Q9CZ62 Q3URD3 A2AGT5 Q60668 Q70FJ1 Q6IRU2 Q9ER88 A2AHG0 Q8K012
166	nucleotide binding	9/42 21.4%	Q9D4V7 Q8VHK9 A2AF47 P60122 Q60668 Q9EPE9 Q8R527 Q3UVC0 Q9WUA6
16787	hydrolase activity	9/42 21.4%	Q8VHK9 Q9DCC4 P60122 Q8K093 Q9JI46 Q9CSH3 Q8VCF1 Q9EPE9 Q8R527
32555	purine ribonucleotide binding	8/42 19.0%	Q9D4V7 Q8VHK9 A2AF47 P60122 Q9EPE9 Q8R527 Q3UVC0 Q9WUA6
32553	ribonucleotide binding	8/42 19.0%	Q9D4V7 Q8VHK9 A2AF47 P60122 Q9EPE9 Q8R527 Q3UVC0 Q9WUA6
5856	cytoskeleton	7/42 16.6%	Q9CZ62 Q3URD3 A2AGT5 Q70FJ1 Q6IRU2 A2AHG0 Q8K012
16462	pyrophosphatase activity	6/42 14.2%	Q8VHK9 P60122 Q9JI46 Q8VCF1 Q9EPE9 Q8R527
16818	hydrolase activity, acting on acid anhydrides, in phosphorus-containing anhydrides	6/42 14.2%	Q8VHK9 P60122 Q9JI46 Q8VCF1 Q9EPE9 Q8R527
16817	hydrolase activity, acting on acid anhydrides	6/42 14.2%	Q8VHK9 P60122 Q9JI46 Q8VCF1 Q9EPE9 Q8R527
6915	apoptosis	5/42 11.9%	Q64337 Q8BGT7 Q9ER88 Q91WL8 Q9CR00
12501	programmed cell death	5/42 11.9%	Q64337 Q8BGT7 Q9ER88 Q91WL8 Q9CR00
8219	cell death	5/42 11.9%	Q64337 Q8BGT7 Q9ER88 Q91WL8 Q9CR00
16265	death	5/42 11.9%	Q64337 Q8BGT7 Q9ER88 Q91WL8 Q9CR00
19899	enzyme binding	4/42 9.5%	Q64337 A2AF47 P70452 Q9WUA6
55086	nucleobase, nucleoside and nucleotide metabolic process	4/42 9.5%	Q9DCC4 Q8VCF1 Q9EPE9 Q8R527
34655	nucleobase, nucleoside, nucleotide and nucleic acid catabolic process	3/42 7.1%	Q9DCC4 Q8VCF1 Q8R527
34656	nucleobase, nucleoside and nucleotide catabolic process	3/42 7.1%	Q9DCC4 Q8VCF1 Q8R527
44270	cellular nitrogen compound catabolic process	3/42 7.1%	Q9DCC4 Q8VCF1 Q8R527
5484	SNAP receptor activity	2/42 4.7%	P70452 Q8VDS8
5080	protein kinase C binding	2/42 4.7%	Q64337 Q9WUA6
32869	cellular response to insulin stimulus	2/42 4.7%	Q8R527 Q9WUA6
71375	cellular response to peptide hormone stimulus	2/42 4.7%	Q8R527 Q9WUA6

## Sheet: C2
Protein Ids	protein names	gene names
G5E8K5	Ankyrin-3	Ank3
O35864	COP9 signalosome complex subunit 5	Cops5
O55023	Inositol monophosphatase 1	Impa1
P06745	Glucose-6-phosphate isomerase	Gpi
P21279	Guanine nucleotide-binding protein G(q) subunit alpha	Gnaq
P26043	Radixin	Rdx
P27546	Microtubule-associated protein 4	Map4
P50518	V-type proton ATPase subunit E 1	Atp6v1e1
P63005	Platelet-activating factor acetylhydrolase IB subunit beta	Pafah1b1
P68510	14-3-3 protein eta	Ywhah
P97315	Cysteine and glycine-rich protein 1	Csrp1
Q2TPA8	Hydroxysteroid dehydrogenase-like protein 2	Hsdl2
Q3UYC0	Protein phosphatase 1H	Ppm1h
Q4VC33	E3 ubiquitin-protein transferase MAEA	Maea
Q5SV85	Synergin gamma	Synrg
Q80TZ3	Putative tyrosine-protein phosphatase auxilin	Dnajc6
Q8BH58	TIP41-like protein	Tiprl
Q8BHL5	Engulfment and cell motility protein 2	Elmo2
Q8BKX1	Brain-specific angiogenesis inhibitor 1-associated protein 2	Baiap2
Q8CIV8	Tubulin-specific chaperone E	Tbce
Q8VDM4	26S proteasome non-ATPase regulatory subunit 2	Psmd2
Q91WC3	Long-chain-fatty-acid--CoA ligase 6	Acsl6
Q91WS0	CDGSH iron-sulfur domain-containing protein 1	Cisd1
Q99PU5	Long-chain-fatty-acid--CoA ligase ACSBG1	Acsbg1
Q9CWZ7	Gamma-soluble NSF attachment protein	Napg
Q9CZ30	Obg-like ATPase 1	Ola1
Q9D593	V-type proton ATPase subunit E 2	Atp6v1e2
Q9ES97	Reticulon-3	Rtn3
Q9JJU8	SH3 domain-binding glutamic acid-rich-like protein	Sh3bgrl
Q9QZB7	Actin-related protein 10	Actr10
Q9R0N7	Synaptotagmin-7	Syt7
Q9Z1S5	Neuronal-specific septin-3	Septin3
Q9Z1Z2	Serine-threonine kinase receptor-associated protein	Strap

## Sheet: C2-terms
GO ID	GO description	cluster frequency	genes
5488	binding	22/26 84.6%	Q80TZ3 Q9CWZ7 Q8CIV8 Q9Z1S5 Q8BKX1 Q9QZB7 Q9CZ30 Q99PU5 Q8VDM4 P97315 Q4VC33 Q9R0N7 Q5SV85 Q9Z1Z2 O35864 P68510 Q2TPA8 Q9JJU8 Q91WS0 Q8BHL5 P63005 P21279
44464	cell part	22/26 84.6%	Q9CWZ7 Q8CIV8 Q9Z1S5 Q8BKX1 Q9QZB7 Q9CZ30 Q99PU5 Q8VDM4 P97315 Q4VC33 Q9R0N7 Q5SV85 Q9Z1Z2 O35864 P68510 Q2TPA8 Q91WS0 Q8BHL5 Q8BH58 P27546 P63005 P21279
5623	cell	22/26 84.6%	Q9CWZ7 Q8CIV8 Q9Z1S5 Q8BKX1 Q9QZB7 Q9CZ30 Q99PU5 Q8VDM4 P97315 Q4VC33 Q9R0N7 Q5SV85 Q9Z1Z2 O35864 P68510 Q2TPA8 Q91WS0 Q8BHL5 Q8BH58 P27546 P63005 P21279
5622	intracellular	21/26 80.7%	Q9CWZ7 Q8CIV8 Q9Z1S5 Q8BKX1 Q9QZB7 Q9CZ30 Q99PU5 Q8VDM4 P97315 Q4VC33 Q9R0N7 Q5SV85 Q9Z1Z2 O35864 P68510 Q2TPA8 Q91WS0 Q8BHL5 Q8BH58 P27546 P63005
44424	intracellular part	20/26 76.9%	Q9CWZ7 Q8CIV8 Q9Z1S5 Q8BKX1 Q9QZB7 Q99PU5 Q8VDM4 P97315 Q4VC33 Q9R0N7 Q5SV85 Q9Z1Z2 O35864 P68510 Q2TPA8 Q91WS0 Q8BHL5 Q8BH58 P27546 P63005
5737	cytoplasm	17/26 65.3%	Q9CWZ7 Q8CIV8 Q9Z1S5 Q8BKX1 Q9QZB7 Q99PU5 Q4VC33 Q9R0N7 Q5SV85 Q9Z1Z2 O35864 P68510 Q2TPA8 Q91WS0 Q8BHL5 Q8BH58 P63005
43229	intracellular organelle	16/26 61.5%	Q9CWZ7 Q8CIV8 Q9Z1S5 Q9QZB7 Q99PU5 P97315 Q4VC33 Q9R0N7 Q5SV85 Q9Z1Z2 O35864 Q2TPA8 Q91WS0 Q8BHL5 P27546 P63005
43226	organelle	16/26 61.5%	Q9CWZ7 Q8CIV8 Q9Z1S5 Q9QZB7 Q99PU5 P97315 Q4VC33 Q9R0N7 Q5SV85 Q9Z1Z2 O35864 Q2TPA8 Q91WS0 Q8BHL5 P27546 P63005
5515	protein binding	15/26 57.6%	Q80TZ3 Q8CIV8 Q9Z1S5 Q8BKX1 Q9QZB7 Q8VDM4 P97315 Q4VC33 Q9Z1Z2 O35864 P68510 Q9JJU8 Q8BHL5 P63005 P21279
9987	cellular process	15/26 57.6%	Q9CWZ7 Q8CIV8 Q9Z1S5 Q8BKX1 Q9QZB7 Q99PU5 P97315 Q4VC33 Q9R0N7 Q5SV85 Q9Z1Z2 P68510 Q8BHL5 P63005 P21279
16043	cellular component organization	9/26 34.6%	Q8CIV8 P68510 Q8BKX1 P97315 Q8BHL5 P63005 Q4VC33 Q9R0N7 Q5SV85
32991	macromolecular complex	9/26 34.6%	Q9Z1Z2 O35864 Q9Z1S5 Q9QZB7 Q8VDM4 P27546 P63005 Q5SV85 P21279
5856	cytoskeleton	8/26 30.7%	Q8CIV8 Q9Z1S5 Q9QZB7 P97315 Q8BHL5 P27546 P63005 Q4VC33
43228	non-membrane-bounded organelle	8/26 30.7%	Q8CIV8 Q9Z1S5 Q9QZB7 P97315 Q8BHL5 P27546 P63005 Q4VC33
43232	intracellular non-membrane-bounded organelle	8/26 30.7%	Q8CIV8 Q9Z1S5 Q9QZB7 P97315 Q8BHL5 P27546 P63005 Q4VC33
43234	protein complex	8/26 30.7%	O35864 Q9Z1S5 Q9QZB7 Q8VDM4 P27546 P63005 Q5SV85 P21279
44446	intracellular organelle part	8/26 30.7%	Q9Z1Z2 O35864 Q9Z1S5 Q9QZB7 Q91WS0 P27546 P63005 Q5SV85
44422	organelle part	8/26 30.7%	Q9Z1Z2 O35864 Q9Z1S5 Q9QZB7 Q91WS0 P27546 P63005 Q5SV85
7010	cytoskeleton organization	5/26 19.2%	Q8CIV8 P68510 P97315 P63005 Q4VC33
19904	protein domain specific binding	5/26 19.2%	Q80TZ3 P68510 Q8BKX1 Q9JJU8 Q8BHL5
5624	membrane fraction	5/26 19.2%	Q9Z1S5 Q99PU5 P63005 Q9R0N7 P21279
5626	insoluble fraction	5/26 19.2%	Q9Z1S5 Q99PU5 P63005 Q9R0N7 P21279
267	cell fraction	5/26 19.2%	Q9Z1S5 Q99PU5 P63005 Q9R0N7 P21279
6996	organelle organization	5/26 19.2%	Q8CIV8 P68510 P97315 P63005 Q4VC33
17124	SH3 domain binding	4/26 15.3%	Q80TZ3 Q8BKX1 Q9JJU8 Q8BHL5
61024	membrane organization	4/26 15.3%	Q8BHL5 P63005 Q9R0N7 Q5SV85
16044	cellular membrane organization	4/26 15.3%	Q8BHL5 P63005 Q9R0N7 Q5SV85
8092	cytoskeletal protein binding	4/26 15.3%	P68510 Q8BKX1 P63005 Q4VC33
48699	generation of neurons	4/26 15.3%	Q8CIV8 P68510 P63005 P21279
22008	neurogenesis	4/26 15.3%	Q8CIV8 P68510 P63005 P21279
44430	cytoskeletal part	4/26 15.3%	Q9Z1S5 Q9QZB7 P27546 P63005
48468	cell development	4/26 15.3%	Q8CIV8 P63005 Q4VC33 P21279
51129	negative regulation of cellular component organization	3/26 11.5%	P68510 P27546 P63005
7017	microtubule-based process	3/26 11.5%	Q8CIV8 Q9QZB7 P63005
15629	actin cytoskeleton	3/26 11.5%	Q9QZB7 P97315 Q4VC33
51726	regulation of cell cycle	3/26 11.5%	O35864 P68510 P63005
51301	cell division	3/26 11.5%	Q9Z1S5 P63005 Q4VC33
5525	GTP binding	3/26 11.5%	Q9Z1S5 Q9CZ30 P21279
19001	guanyl nucleotide binding	3/26 11.5%	Q9Z1S5 Q9CZ30 P21279
32561	guanyl ribonucleotide binding	3/26 11.5%	Q9Z1S5 Q9CZ30 P21279
15630	microtubule cytoskeleton	3/26 11.5%	Q9QZB7 P27546 P63005
46907	intracellular transport	3/26 11.5%	Q9CWZ7 P68510 P63005
51128	regulation of cellular component organization	3/26 11.5%	P68510 P27546 P63005
31345	negative regulation of cell projection organization	2/26 7.6%	P68510 P63005
5875	microtubule associated complex	2/26 7.6%	Q9QZB7 P63005
8344	adult locomotory behavior	2/26 7.6%	Q8CIV8 P63005
7018	microtubule-based movement	2/26 7.6%	Q9QZB7 P63005
48469	cell maturation	2/26 7.6%	Q4VC33 P21279
226	microtubule cytoskeleton organization	2/26 7.6%	Q8CIV8 P63005
7346	regulation of mitotic cell cycle	2/26 7.6%	P68510 P63005
9791	post-embryonic development	2/26 7.6%	Q8CIV8 P21279
21953	central nervous system neuron differentiation	2/26 7.6%	P63005 P21279
10769	regulation of cell morphogenesis involved in differentiation	2/26 7.6%	P68510 P63005
30534	adult behavior	2/26 7.6%	Q8CIV8 P63005
21700	developmental maturation	2/26 7.6%	Q4VC33 P21279
30136	clathrin-coated vesicle	2/26 7.6%	Q9R0N7 Q5SV85
10975	regulation of neuron projection development	2/26 7.6%	P68510 P63005

## Sheet: C3
Protein Ids	protein names	gene names
Q9DCN2	NADH-cytochrome b5 reductase 3	Cyb5r3
Q8K3F6	Potassium voltage-gated channel subfamily KQT member 3	Kcnq3
Q9CQN1	Heat shock protein 75 kDa, mitochondrial	Trap1
P04104	Keratin, type II cytoskeletal 1	Krt1
Q5M8N4	Epimerase family protein SDR39U1	Sdr39u1
Q99J27	Acetyl-coenzyme A transporter 1	Slc33a1
Q8R3L5	Solute carrier organic anion transporter family member 3A1	Slco3a1
O54865	Guanylate cyclase soluble subunit beta-1	Gucy1b1
P55284	Cadherin-5	Cdh5
P97355	Spermine synthase	Sms
P70365	Nuclear receptor coactivator 1	Ncoa1
P21981	Protein-glutamine gamma-glutamyltransferase 2	Tgm2
Q8VHQ9	Acyl-coenzyme A thioesterase 11	Acot11
P61087	Ubiquitin-conjugating enzyme E2 K	Ube2k
Q8CI61	BAG family molecular chaperone regulator 4	Bag4
Q9Z103	Activity-dependent neuroprotector homeobox protein	Adnp
Q922B1	ADP-ribose glycohydrolase MACROD1	Macrod1
Q9CR62	Mitochondrial 2-oxoglutarate/malate carrier protein	Slc25a11
P22723	Gamma-aminobutyric acid receptor subunit gamma-2	Gabrg2
Q9R0Y8	Gamma-aminobutyric acid receptor subunit gamma-1	Gabrg1
Q66L44	Voltage-dependent calcium channel beta subunit-associated regulatory protein	Cbarp
Q9JI18	Low-density lipoprotein receptor-related protein 1B	Lrp1b
Q9DCD0	6-phosphogluconate dehydrogenase, decarboxylating	Pgd
Q8R0A0	General transcription factor IIF subunit 2	Gtf2f2
G3X9N3	PNMA-like 2	Pnmal2
Q60737	Casein kinase II subunit alpha	Csnk2a1
Q8R180	ERO1-like protein alpha	Ero1a
P97783	Protein AF1q	Mllt11
D3YVV7	RNA-binding protein Nova-2	Nova2

## Sheet: C3-terms
GO ID	GO description	cluster frequency	genes
44464	cell part	18/21 85.7%	P04104 Q9CQN1 Q8R3L5 Q922B1 Q8CI61 Q8R0A0 Q99J27 P70365 Q9CR62 Q9DCD0 Q8R180 Q8K3F6 Q9DCN2 Q66L44 Q8VHQ9 P61087 P21981 P55284
5623	cell	18/21 85.7%	P04104 Q9CQN1 Q8R3L5 Q922B1 Q8CI61 Q8R0A0 Q99J27 P70365 Q9CR62 Q9DCD0 Q8R180 Q8K3F6 Q9DCN2 Q66L44 Q8VHQ9 P61087 P21981 P55284
9987	cellular process	15/21 71.4%	Q9CQN1 Q8R3L5 Q8CI61 P97355 Q8R0A0 P70365 Q9CR62 Q9DCD0 Q8R180 Q8K3F6 Q5M8N4 Q8VHQ9 P61087 P21981 P55284
44424	intracellular part	14/21 66.6%	P04104 Q9CQN1 Q922B1 Q8CI61 Q8R0A0 Q99J27 P70365 Q9CR62 Q9DCD0 Q8R180 Q9DCN2 Q8VHQ9 P61087 P21981
5622	intracellular	14/21 66.6%	P04104 Q9CQN1 Q922B1 Q8CI61 Q8R0A0 Q99J27 P70365 Q9CR62 Q9DCD0 Q8R180 Q9DCN2 Q8VHQ9 P61087 P21981
8152	metabolic process	12/21 57.1%	Q9DCN2 Q9CQN1 Q5M8N4 Q8VHQ9 Q8CI61 P97355 Q8R0A0 P61087 P70365 Q9DCD0 P21981 Q8R180
44237	cellular metabolic process	11/21 52.3%	Q9CQN1 Q5M8N4 Q8VHQ9 Q8CI61 P97355 Q8R0A0 P61087 P70365 Q9DCD0 P21981 Q8R180
44238	primary metabolic process	11/21 52.3%	Q9DCN2 Q9CQN1 Q8VHQ9 Q8CI61 P97355 Q8R0A0 P61087 P70365 Q9DCD0 P21981 Q8R180
5737	cytoplasm	11/21 52.3%	Q9DCN2 Q9CQN1 Q922B1 Q8VHQ9 Q8CI61 P61087 Q99J27 Q9CR62 Q9DCD0 P21981 Q8R180
3824	catalytic activity	10/21 47.6%	Q9DCN2 Q5M8N4 Q8VHQ9 P97355 Q8R0A0 P61087 P70365 Q9DCD0 P21981 Q8R180
166	nucleotide binding	7/21 33.3%	Q9DCN2 Q9CQN1 Q8R0A0 P61087 Q9DCD0 P21981 Q8R180
17076	purine nucleotide binding	6/21 28.5%	Q9DCN2 Q9CQN1 Q8R0A0 P61087 P21981 Q8R180
5739	mitochondrion	5/21 23.8%	Q9DCN2 Q9CQN1 Q922B1 Q9CR62 P21981
30554	adenyl nucleotide binding	5/21 23.8%	Q9DCN2 Q9CQN1 Q8R0A0 P61087 Q8R180
1883	purine nucleoside binding	5/21 23.8%	Q9DCN2 Q9CQN1 Q8R0A0 P61087 Q8R180
1882	nucleoside binding	5/21 23.8%	Q9DCN2 Q9CQN1 Q8R0A0 P61087 Q8R180
50662	coenzyme binding	4/21 19.0%	Q9DCN2 Q5M8N4 Q9DCD0 Q8R180
48037	cofactor binding	4/21 19.0%	Q9DCN2 Q5M8N4 Q9DCD0 Q8R180
6461	protein complex assembly	3/21 14.2%	Q8CI61 Q8R0A0 P21981
70271	protein complex biogenesis	3/21 14.2%	Q8CI61 Q8R0A0 P21981
65003	macromolecular complex assembly	3/21 14.2%	Q8CI61 Q8R0A0 P21981
43933	macromolecular complex subunit organization	3/21 14.2%	Q8CI61 Q8R0A0 P21981
50660	FAD binding	2/21 9.5%	Q9DCN2 Q8R180
6457	protein folding	2/21 9.5%	Q9CQN1 Q8R180
5789	endoplasmic reticulum membrane	2/21 9.5%	Q9DCN2 Q8R180
42175	nuclear membrane-endoplasmic reticulum network	2/21 9.5%	Q9DCN2 Q8R180

## Sheet: C4
Protein Ids	Protein names	Gene names
Q9Z0V7	Mitochondrial import inner membrane translocase subunit Tim17-B	Timm17b
Q9QUR8	Semaphorin-7A	Sema7a
Q8R105	Vacuolar protein sorting-associated protein 37C	Vps37c
Q9JKS5	Intracellular hyaluronan-binding protein 4	Habp4
Q3UHK1	Proton myo-inositol cotransporter	Slc2a13
P46662	Merlin	Nf2
P10922	Histone H1.0	H1-0
Q9CQX5	Claudin domain-containing protein 1	Cldnd1
Q921E2	Ras-related protein Rab-31	Rab31
Q3UHD1	Adhesion G protein-coupled receptor B1	Adgrb1
O88958	Glucosamine-6-phosphate isomerase 1	Gnpda1
Q80U30	Protein CLEC16A	Clec16a
Q9D6S7	Ribosome-recycling factor, mitochondrial	Mrrf
Q3UWL8	Prefoldin subunit 4	Pfdn4
Q8K097	Protein lifeguard 2	Faim2
Q91WD9	Secretagogin	Scgn
Q80X85	28S ribosomal protein S7, mitochondrial	Mrps7
P98156	Very low-density lipoprotein receptor	Vldlr

## Sheet: C4-terms
GO ID	GO description	cluster frequency	genes
44464	cell part	16/18 88.8%	P98156 P97792 Q9D6S7 P10922 Q921E2 Q9CQX5 Q80X85 Q91WD9 Q9QUR8 O88958 Q9JKS5 Q3UHK1 Q8R105 P46662 Q9Z0V7 Q8K097
5623	cell	16/18 88.8%	P98156 P97792 Q9D6S7 P10922 Q921E2 Q9CQX5 Q80X85 Q91WD9 Q9QUR8 O88958 Q9JKS5 Q3UHK1 Q8R105 P46662 Q9Z0V7 Q8K097
9987	cellular process	13/18 72.2%	P98156 P97792 Q9D6S7 P10922 Q921E2 Q80X85 Q9QUR8 O88958 Q9JKS5 Q3UHK1 P46662 Q9Z0V7 Q8K097
45216	cell-cell junction organization	2/18 11.1%	P97792 P46662
34330	cell junction organization	2/18 11.1%	P97792 P46662

## Sheet: C5
Protein Ids	protein names	gene names
Q5XJV6	Serine/threonine-protein kinase LMTK3	Lmtk3
Q99LD8	N(G),N(G)-dimethylarginine dimethylaminohydrolase 2	Ddah2
P19253	60S ribosomal protein L13a	Rpl13a
Q3TW96	UDP-N-acetylhexosamine pyrophosphorylase-like protein 1	Uap1l1
Q8CI96	CAP-Gly domain-containing linker protein 4	Clip4
Q69ZS8	Kazrin	Kazn
Q8BR63	Protein FAM177A1	Fam177a1
Q9Z0H4	CUGBP Elav-like family member 2	Celf2
Q8R3B1	1-phosphatidylinositol 4,5-bisphosphate phosphodiesterase delta-1	Plcd1
Q8R2R9	AP-3 complex subunit mu-2	Ap3m2
Q3TC93	HCLS1-binding protein 3	Hs1bp3
Q9DC48	Pre-mRNA-processing factor 17	Cdc40
Q9CQ02	COMM domain-containing protein 4	Commd4
Q9Z2W9	Glutamate receptor 3	Gria3
