# Supplementary material for: Fish Hydrolysate Supplementation Prevents Stress-Induced Dysregulation of Hippocampal Proteins Relative to Mitochondrial Metabolism and the Neuronal Network in Mice
Source: Foods. 2022 May 28;11(11):1591. doi: 10.3390/foods11111591 (PMC9180483; doi:10.3390/foods11111591)
Supplement: Supplementary file 1 [file foods-11-01591-s001.zip › Table_S4_interaction-proteins.xlsx]

## Sheet: proteins
C-NS_1	C-NS_1-1	C-NS_2	C-NS_3	C-NS_4	C-NS_4-1	C-NS_5	C-NS_5-1	C-S_19	C-S_20	C-S_21-1	C-S_22-1	C-S_23	C-S_24	C-S_24-1	C-S_25-1	FH-NS_10	FH-NS_11	FH-NS_11-1	FH-NS_12	FH-NS_13-1	FH-NS_14-1	FH-NS_7	FH-NS_9	FH-S_25	FH-S_27	FH-S_28	FH-S_29	FH-S_30	FH-S_31-1	FH-S_32-1	FH-S_34-1	moyenne	Unique peptides	#NAME?	-Log Student's T-test p-value C-S_C-NS	Student's T-test Difference C-S_C-NS	-Log Student's T-test p-value FH-S_FH-NS	Student's T-test Difference FH-S_FH-NS	-Log Student's T-test p-value FH-NS_C-NS	Student's T-test Difference FH-NS_C-NS	-Log Student's T-test p-value FH-S_C-S	Student's T-test Difference FH-S_C-S	Two-way ANOVA p value Group1_stress	Two-way ANOVA p value Group2_suppl	Two-way ANOVA p value Interaction	ANOVA p value	Protein IDs	Majority protein IDs	Protein names
0.305873	-0.105678	0.240151	0.0342912	0.426609	0.294658	0.126314	0.221702	-0.39257	0.24318	-0.162876	-0.0484234	-0.285911	-0.227815	-0.0692838	-0.017581	-0.0698448	-0.0725364	0.0801061	-0.393691	0.0128138	-0.0599746	-0.311145	-0.441239	0.173082	-0.0313755	0.193327	0.413822	0.223273	-0.143474	-0.279069	0.123286	178325	13	2.27935	2.34069	-0.456244	1.34129	0.371745	2.48147	-0.525098	1.12065	0.302891	0.699685	0.3142	0.00068149	0.0052559	Q5XJY5	Q5XJY5	Coatomer subunit delta
0.0433566	-0.244289	0.607817	-0.341284	-0.301482	-0.424347	-0.372066	-0.112244	-0.377697	0.0650078	-0.0937156	-0.196205	0.00198955	-0.0307655	0.0654718	0.134318	-0.210691	0.331318	0.292745	0.288023	0.365696	1.32343	0.18738	0.431679	-0.392924	-0.164368	0.0284956	-0.20965	-0.0184006	-0.367206	-0.292216	-0.0171748	16373.5	2	2.63676	NaN	0	NaN	0	NaN	0	NaN	0	0.0660925	0.0754012	0.00208037	0.00230803	O35671	O35671	Integrin beta-1-binding protein 1
2.0679	0.276384	0.330236	0.614176	0.0526602	-0.836568	-0.0469761	-0.27441	-0.714346	-0.885466	-0.690609	0.439162	-0.893095	-0.815793	-0.822855	-0.812431	3.44562	-0.818301	0.193062	-0.681151	-0.879531	-0.736701	-0.627819	-0.800818	0.137914	0.48163	-0.642532	4.38801	0.141941	0.720654	-0.710315	-0.599641	81707.3	3	1.85446	2.42144	-2.0849	0.876497	1.25003	0.99853	-1.30438	2.11532	2.03055	0.405178	0.468375	0.00217231	0.0139812	Q8BL86	Q8BL86	Metallo-beta-lactamase domain-containing protein 2
-0.309012	-0.0276082	-0.0517236	-0.178705	-0.374901	-0.546187	0.206607	0.494351	0.522487	-0.234747	0.371033	0.00847425	0.266622	0.473341	-0.220862	0.452788	0.848413	-0.0430449	-0.144332	0.569348	-0.134109	0.0206237	-0.143966	0.24415	-0.190901	-0.506752	-0.294452	-0.50308	0.0011665	-0.53654	0.173722	-0.212202	109472	3	1.81176	1.10441	0.458529	1.84965	-0.652356	0.849708	0.382776	2.17734	-0.728108	0.5682	0.31231	0.00257384	0.0154256	Q64314	Q64314	Hematopoietic progenitor cell antigen CD34
-0.708809	0.0241884	-0.303152	0.16633	-0.25232	0.202326	-0.468776	-0.738052	0.767332	-0.429219	0.10503	0.319718	-0.102938	0.577457	0.594003	-0.22445	-0.0475073	0.134329	-0.0833723	0.860758	0.309116	0.368683	-0.270019	0.689422	-0.460169	-0.472131	-0.0762421	0.216595	-0.153431	-0.117052	-0.438828	0.0111827	17715.4	2	1.70878	NaN	0	NaN	0	NaN	0	NaN	0	0.666642	0.419543	0.00277617	0.0195534	Q921S7	Q921S7	39S ribosomal protein L37, mitochondrial
-0.516071	-0.552259	-0.113528	-0.272556	-0.445964	-0.415236	-0.354961	-0.588391	-0.106935	-0.090719	0.149651	0.18068	0.514822	1.47837	-0.427636	0.365264	0.750413	0.000967813	0.218334	0.0185665	-0.345866	-0.361257	0.0036638	1.61531	-0.393501	0.459792	0.0193256	-0.714762	-0.319742	0.261148	0.187289	-0.204208	16835.3	3	1.96414	2.8311	1.00897	0.612903	-0.439318	2.43196	0.954041	0.752989	-0.494244	0.208615	0.307761	0.00283445	0.0108607	Q9CZU3	Q9CZU3	Superkiller viralicidic activity 2-like 2
1.5716	-0.224014	-0.101236	2.14259	-0.142114	0.179493	0.26281	-0.339425	0.206805	-0.801917	-0.846042	-0.00507276	-0.855063	-0.873503	-0.358102	0.648219	-0.91797	-0.863767	0.118523	0.330034	-0.788357	-0.0638359	-0.0478349	-0.766576	0.140962	-0.803019	1.57786	0.160181	0.153469	-0.103968	0.289754	1.11952	108742	3	1.57927	1.6519	-1.5887	1.247	1.41762	1.61358	-1.58323	1.27395	1.42309	0.853967	0.863196	0.00289041	0.0263471	Q9D1H7	Q9D1H7	Golgi to ER traffic protein 4 homolog
-0.492525	-0.448485	-0.168356	0.063965	-0.25246	-0.615727	0.0101083	-0.215088	-0.309201	0.499985	-0.148357	-0.286441	-0.285855	-0.0665781	0.685477	-0.283133	0.138424	0.00884647	0.451123	0.162076	1.25921	0.870032	0.516922	-0.0782203	-0.260374	-0.21399	0.796006	-0.379248	-0.491991	-0.051198	-0.15701	-0.257936	14446.2	3	2.29456	0.841822	0.396078	1.99837	-0.733933	2.87486	0.958029	0.281846	-0.171982	0.349973	0.0353345	0.0035887	0.00507508	P59823	P59823	Interleukin-1 receptor accessory protein-like 1
-0.196257	0.0325087	-0.0110558	0.0315058	-0.131813	-0.243787	-0.0942713	-0.159367	0.0579057	0.0576036	0.276583	0.0707539	-0.0511579	0.1621	0.0456594	0.109701	0.0279418	0.0478667	0.158938	0.0123831	-0.0257113	-0.0268158	0.451244	0.0600631	0.113064	-0.0695271	0.0488202	-0.390543	-0.462967	0.189754	-0.023754	-0.0673694	199243	19	1.47295	2.64579	0.276146	0.997581	-0.28238	1.98126	0.265388	1.12495	-0.293138	0.972136	0.87647	0.00379174	0.033655	Q5SXY1	Q5SXY1	Cytospin-B
-0.356252	0.0934711	0.0504684	-0.332342	-0.318622	-0.178345	-0.204556	-0.180534	0.417254	-0.103487	0.293568	0.108037	0.0792524	0.0957387	0.050817	-0.159617	-0.307152	0.104548	-0.0500173	0.274291	0.0881496	0.329942	0.320608	0.271936	-0.151985	-0.302162	0.0558763	0.0433155	-0.319747	0.00755177	0.45799	-0.177996	1.14644e+06	7	1.70042	2.16612	0.425001	0.816492	-0.259033	2.00916	0.455473	0.788587	-0.228561	0.451776	0.305715	0.00391029	0.0199334	Q8BNY6	Q8BNY6	Neuronal calcium sensor 1
-0.441733	0.331318	0.479366	0.839296	0.500915	0.566345	0.2835	0.251631	-0.642914	-0.128871	0.490694	0.434899	-0.388519	-0.401939	-0.637548	0.454691	0.649256	-0.555108	-0.165292	-0.644677	-0.678711	-0.542894	-0.443412	-0.520207	0.800493	-0.0673402	-0.0871689	0.438383	-0.114299	0.393917	0.218492	-0.672564	30719.9	2	1.79937	1.2367	-0.73695	1.43406	0.873937	2.67132	-1.22569	0.446078	0.385193	0.794293	0.117495	0.0044289	0.0158721	Q8CAY6;Q80X81	Q8CAY6;Q80X81	Acetyl-CoA acetyltransferase, cytosolic
0.516968	-0.266234	-0.20053	0.486525	0.322547	0.320588	0.375634	0.00584486	-0.360722	-0.256406	-0.136021	-0.120516	-0.0459147	-0.432203	-0.123172	-0.119155	0.0251679	-0.0800779	0.0140457	-0.347641	-0.0437566	-0.347808	-0.293591	-0.260623	-0.200695	0.355979	-0.33695	1.31488	0.723409	-0.188478	-0.147939	-0.153153	301199	6	1.45848	2.18425	-0.550348	0.835975	0.380795	1.86671	-0.496946	1.00984	0.434198	0.578356	0.836648	0.00451021	0.0347949	Q6PHZ2	Q6PHZ2	Calcium/calmodulin-dependent protein kinase type II subunit delta
-0.47019	-0.440851	-0.55996	-0.332312	-0.399382	-0.0488777	-0.275833	-0.27979	1.22405	0.358889	0.33922	0.0280763	-0.00167047	0.205822	-0.131097	0.00167041	-0.191505	0.0146885	0.414574	-0.243754	-0.108226	0.117817	0.450046	0.285021	0.0549998	0.226413	-0.0261092	-0.68427	-0.645098	0.380584	0.995639	-0.258587	17709.2	2	1.78661	NaN	0	NaN	0	NaN	0	NaN	0	0.139488	0.52808	0.0046758	0.0163452	Q9EST3	Q9EST3	Eukaryotic translation initiation factor 4E transporter
-0.492808	0.179073	0.0164031	-0.440613	-0.301037	-0.116131	-0.623827	-0.131199	0.0605727	0.1294	0.278289	-0.0551018	0.775788	0.311303	0.327861	-0.0610331	-0.435943	0.0724093	0.247119	0.149669	0.367108	0.030814	0.115014	0.0446969	0.335963	-0.352551	-0.190007	-0.426125	-0.27663	0.422787	0.301915	-0.263177	396201	7	1.74431	2.27884	0.741894	0.479837	-0.230323	1.41219	0.54678	1.1816	-0.425438	0.122004	0.708092	0.00520612	0.0180173	Q9CQF9	Q9CQF9	Prenylcysteine oxidase
-0.445855	0.0150322	-0.160238	-0.816867	-0.792695	0.941998	-0.419161	-0.745842	-0.237277	0.20626	0.344357	-0.0901347	0.112348	0.907645	-0.252294	0.17615	0.647992	0.0136603	-0.215488	-0.00181346	0.103582	0.069179	0.657012	0.740455	-0.161	-0.648274	-0.609821	-0.115874	-0.172231	-0.0537239	0.422793	0.580125	39356.4	5	1.7504	1.49954	1.08427	1.0692	-0.57926	1.76474	1.21975	0.737095	-0.443779	0.367694	0.17047	0.00539867	0.0177664	Q0PMG2	Q0PMG2	MAM domain-containing glycosylphosphatidylinositol anchor protein 1
-0.532943	0.406825	0.117689	-0.137723	0.194811	-0.263804	0.0752294	-0.0249279	-0.294718	0.0909704	0.247815	0.0220091	-0.0136635	0.126643	0.133431	0.0354407	-0.199031	0.500411	0.276411	0.162172	0.167804	0.0773951	0.125271	0.438454	-0.17094	-0.377725	-0.279503	-0.102917	-0.41947	0.180081	-0.0978614	-0.463635	138482	4	1.86542	0.31768	0.141475	2.66649	-0.629705	0.907281	0.329526	1.79951	-0.441654	0.06855	0.666852	0.00572671	0.0136327	Q8C166	Q8C166	Copine-1
-0.0838228	-0.0379367	0.0853509	-0.277487	-0.283838	-0.112176	0.154205	-0.0197761	0.0293585	-0.0802244	0.192894	-0.149175	0.175855	0.332871	-0.0236162	0.0442955	-0.00584137	0.115734	0.012079	0.117641	0.0579291	0.0329685	0.105758	0.293505	-0.156336	-0.380006	-0.158315	0.210669	0.00104194	-0.183951	0.117544	-0.127197	828137	9	1.3064	0.996862	0.203357	1.51886	-0.275896	1.62737	0.247467	1.01233	-0.231786	0.659297	0.923944	0.00644698	0.0493857	Q9DBG6	Q9DBG6	Dolichyl-diphosphooligosaccharide--protein glycosyltransferase subunit 2
-0.809455	0.297635	0.124177	-0.750953	-0.639026	-0.91425	0.223652	-0.78138	-0.200855	-0.51299	0.792516	0.30236	0.0771134	0.0467189	0.137459	0.00732056	0.28783	0.408074	0.185502	-0.342599	1.15895	0.316531	0.383562	0.335517	-0.788337	0.236399	-0.26161	0.772996	-0.827621	-0.395322	0.859903	0.270181	112189	3	1.75659	1.58338	1.37496	0.898355	-0.807386	2.13952	1.70756	0.438563	-0.474783	0.451432	0.108322	0.00656921	0.017515	Q9Z2Q5	Q9Z2Q5	39S ribosomal protein L40, mitochondrial
-0.18951	0.0918791	-0.169501	-0.388098	-0.146053	-0.207463	-0.246703	-0.120825	0.393502	-0.241209	0.0805787	0.129634	0.0391431	0.0350312	-0.0658606	-0.127772	-0.251974	-0.05869	-0.0497912	0.253403	0.283487	0.335582	0.372837	0.41885	-0.00189458	-0.0273462	0.181626	-0.24228	-0.130692	-0.0401677	-0.00192889	0.0922068	578736	24	1.98834	1.60011	0.31104	0.926601	-0.228058	2.26764	0.474513	0.232896	-0.064585	0.657012	0.0349025	0.0069106	0.0102721	P27546	P27546	Microtubule-associated protein 4
0.710801	-0.108462	-0.0838447	-0.426002	-0.666125	-0.501777	-0.11226	-0.0857824	-0.252313	-0.0864916	-0.151772	0.460812	0.806661	-0.272557	0.171254	-0.0315587	-0.0195721	0.919144	0.269936	-0.21396	-0.0986098	0.807696	0.30796	0.326693	-0.303323	-0.645502	0.0761954	0.0117993	0.228758	-0.348922	-0.0695933	-0.619284	16918.9	3	1.35143	NaN	0	NaN	0	NaN	0	NaN	0	0.446612	0.642894	0.00733432	0.0445214	P22599;Q00898	P22599	Alpha-1-antitrypsin 1-2
0.7219	-0.12035	-0.0294416	0.236021	1.25744	0.372813	0.273217	0.121012	-0.242733	-0.102415	-0.287675	-0.158322	-0.437611	-0.275519	0.622768	-0.104179	0.369213	-0.0961298	-0.145004	-0.663189	-0.182802	-0.155683	-0.506967	-0.549574	0.174731	0.301923	-0.468477	0.586862	0.235743	-0.29949	-0.354346	-0.0937294	1.0834e+06	14	1.77041	1.90182	-0.632169	0.779761	0.447599	2.20097	-0.900178	0.310416	0.17959	0.628826	0.066675	0.00793231	0.0169665	Q9Z0E0	Q9Z0E0	Neurochondrin
-0.179459	0.203211	-0.0441387	-0.222183	0.111494	-0.227324	-0.461446	-0.0532293	-0.0147361	-0.0928813	0.157353	0.107576	0.466799	0.355896	-0.0267426	-0.156232	-0.0699995	0.21832	-0.104072	0.129549	0.219699	0.0854759	0.0071432	0.265338	0.0844102	-0.246477	-0.199144	-0.269641	-0.195132	0.224276	0.208572	-0.282274	319021	5	1.20083	1.15807	0.317664	1.25277	-0.280444	1.38218	0.323681	1.02444	-0.274427	0.86077	0.816498	0.00822022	0.0629748	Q91YP2	Q91YP2	Neurolysin, mitochondrial
-0.215958	0.189893	-0.0280946	-0.23008	-0.575185	-0.130154	-0.49927	-0.380873	0.500731	-0.289134	0.394556	-0.0891703	0.0673074	1.38866	-0.0316256	-0.137554	0.153825	-0.154641	0.984791	-0.186643	0.132375	0.123981	-0.0940887	0.139587	-0.255074	-0.320147	-0.392566	-0.72458	0.356629	-0.194295	0.232292	0.264503	17274.3	2	1.18377	1.55599	0.64663	0.869141	-0.480212	1.67587	0.586659	0.900228	-0.540183	0.681604	0.90865	0.0089971	0.0654976	Q9CZL5	Q9CZL5	Pterin-4-alpha-carbinolamine dehydratase 2
-0.0775662	0.569293	0.429323	1.32406	1.36869	0.189467	0.203898	-0.442813	0.0793764	0.0709827	0.323697	0.327788	-0.737978	-0.369295	-0.410319	0.266543	0.499494	-0.817558	-0.606163	-0.214994	-0.427651	-0.725145	0.023611	-0.695982	-0.179884	0.162937	-0.241711	0.435647	-0.42444	-0.21301	0.443209	-0.133516	80660.5	5	1.8939	0.960582	-0.647442	1.35989	0.893767	2.152	-1.38749	0.184699	0.153718	0.659527	0.0339145	0.00946536	0.0127674	Q922B1	Q922B1	O-acetyl-ADP-ribose deacetylase MACROD1
0.743779	0.011809	0.0480591	1.41124	-0.0509485	0.248556	0.639991	0.0610108	-0.314144	0.0899382	-0.251871	-0.308577	-0.302101	-0.395057	0.0146529	-0.183364	-0.0187529	-0.270147	0.169519	0.143981	-0.4136	0.194454	-0.283098	-0.646911	-0.385919	0.106096	-0.198372	0.157356	0.364873	-0.37557	-0.32776	0.320877	165239	10	1.85284	2.7317	-0.760832	0.290346	0.186142	1.69458	-0.719749	0.55402	0.227225	0.103008	0.159694	0.00966763	0.0140332	Q9WTR5	Q9WTR5	Cadherin-13
-0.462275	0.0866483	-0.0520389	-0.00679568	-0.282692	-0.00953494	-0.117892	-0.0915053	0.23141	0.0751049	-0.00372224	0.353633	0.000137884	0.0828006	-0.173334	0.0960353	-0.145768	-0.0513957	-0.0526703	-0.0495491	0.166367	0.138837	0.438928	0.326831	-0.0883253	0.00954874	-0.202114	0.182186	-0.358206	-0.033861	0.123219	-0.130008	839444	12	1.18691	1.38405	0.310447	0.919972	-0.226819	1.30045	0.320307	0.983149	-0.216959	0.670725	0.599614	0.0100689	0.0650269	O88643	O88643	Serine/threonine-protein kinase PAK 1
-0.0765757	0.20701	0.0001723	-0.490854	-0.0215608	-0.183863	-0.15968	-0.309517	-0.0407478	-0.121587	0.0529207	-0.0746875	0.0184637	0.163521	-0.188999	-0.0139967	0.022553	0.0428311	0.135139	0.273591	0.303699	0.0500931	0.500425	0.293448	-0.248449	-0.132722	0.174096	0.264528	-0.348668	-0.0813016	0.219203	-0.228485	926670	9	1.82974	0.69786	0.195583	1.60117	-0.363836	2.25619	0.495143	0.186288	-0.0642755	0.419858	0.0451843	0.0110317	0.0147998	P50518;Q9D593	P50518	V-type proton ATPase subunit E 1
-0.0368304	0.376682	-0.0798367	-0.710162	-0.111022	-0.576098	-0.079715	-0.0646633	0.0388112	-0.155129	0.390145	0.293183	-0.01008	0.172841	0.0829526	0.359624	-0.124503	0.492153	0.123165	-0.162969	0.279634	-0.0796274	0.370135	0.165997	0.083913	-0.00660507	-0.3611	-0.458917	-0.616503	0.583055	0.272615	-0.451147	57270.3	4	1.0831	1.24428	0.569425	0.999917	-0.483979	1.12039	0.541541	1.12167	-0.511863	0.827485	0.939641	0.0113028	0.082585	Q80Y98	Q80Y98	Phospholipase DDHD2
-0.118457	-0.232369	0.215824	0.403601	0.183923	0.634823	0.162201	-0.0913259	-0.354559	0.0940336	-0.305198	-0.270097	-0.262834	-0.100851	-0.128091	-0.101606	-0.126791	-0.087564	0.126208	-0.235149	0.0424994	-0.00258177	0.125027	-0.112013	-0.138516	0.210099	0.0691296	0.554659	0.147566	-0.202238	-0.267369	0.168017	110024	9	1.51123	1.95464	-0.458279	0.360154	0.116135	0.789251	-0.215907	1.4342	0.358507	0.120208	0.509598	0.0118842	0.0308155	P59759;Q8K4J6;Q8VIM5	P59759	MKL/myocardin-like protein 2
-0.0131129	-0.0932528	0.019355	0.103678	0.109864	-0.492232	-0.13126	0.0571256	0.172974	0.178925	-0.0349745	-0.0940185	-0.15259	0.147753	0.0935425	0.300252	-0.0491171	0.402313	0.425	-0.220473	0.216284	-0.173038	0.642671	0.25376	-0.0437542	-0.375624	-0.460824	-0.172154	-0.746732	0.340617	0.0629598	-0.273918	169705	5	1.44764	0.731491	0.210263	1.43333	-0.682166	0.936071	0.319748	1.2706	-0.572681	0.166305	0.452587	0.0119742	0.0356749	Q2M3X8	Q2M3X8	Phosphatase and actin regulator 1
-0.0337716	0.256454	0.295171	-0.539017	-0.691482	0.577969	-0.489078	-0.670465	-0.319232	0.0723326	0.936763	-0.418997	0.320457	0.872557	0.192431	-0.104361	-0.0173555	-0.343896	-0.372123	0.50722	-0.00186002	0.0603608	1.07724	1.036	-0.803129	-0.79694	0.364138	-0.880025	-0.337935	-0.63602	0.319216	0.567378	49950.9	3	1.22765	0.893571	0.648787	1.29997	-1.21379	0.947906	0.69032	1.25625	-1.17226	0.422267	0.492967	0.0120538	0.0592033	Q9JLB9	Q9JLB9	Nectin-3
-0.388715	-0.0329097	0.11403	-0.833681	0.179984	-0.345087	-0.263676	-0.341	0.00309277	-0.0498727	0.317759	-0.254117	0.00826083	-0.00915717	-0.204368	0.4002	0.099666	1.03475	-0.160902	-0.222172	-0.150625	-0.142623	1.37868	1.19023	-0.13797	0.122325	-0.497599	-0.571686	-0.59218	0.516833	0.238958	-0.406427	98857.3	4	1.19376	0.988119	0.583225	1.21565	-0.733803	1.34964	0.884463	0.826476	-0.432564	0.761425	0.365382	0.0121482	0.0640094	P52479	P52479	Ubiquitin carboxyl-terminal hydrolase 10
-0.0594072	-0.522363	-0.174281	-0.328475	-0.291571	-0.205304	-0.33722	-0.404719	0.628142	-0.528469	0.245596	0.313434	0.327796	-0.241414	-0.386174	0.995616	0.720821	0.0835128	-0.428804	1.34282	-0.101389	0.874562	0.0102574	-0.275859	-0.3736	-0.245434	0.0168582	-0.618875	0.430052	-0.438869	0.103145	-0.130383	15293.8	3	1.12019	NaN	0	NaN	0	NaN	0	NaN	0	0.917473	0.50394	0.0122013	0.0758242	Q8R3L2	Q8R3L2	Transcription factor 25
-0.433589	0.180472	-0.333122	-0.660936	-0.267202	0.0358617	-0.478618	-0.423993	0.437914	-0.515786	0.236648	0.43009	0.366459	0.496453	0.0575636	0.118908	0.00452549	-0.134808	-0.512353	0.874922	0.100784	0.487817	0.650587	0.508116	-0.35774	-0.436653	0.360221	-0.255096	-0.929415	0.0378905	0.382734	-0.028656	270934	5	1.03886	1.94505	0.80422	0.811399	-0.811097	1.78095	0.819313	0.818685	-0.796004	0.991017	0.969558	0.0125294	0.0914418	Q8VDN4	Q8VDN4	Coiled-coil domain-containing protein 92
0.170794	-0.61948	-0.335403	3.03175	0.425447	0.141304	0.782	0.650035	-0.414671	0.507028	-0.664102	-0.689163	-0.755844	-0.192741	-0.197628	-0.597572	-0.230395	-0.41207	1.14383	-0.180573	-0.298857	-0.714128	-0.65659	-0.397385	-0.264011	0.810385	-0.0698264	1.1423	-0.238731	-0.679661	-0.374132	0.178088	28712.1	5	1.2557	1.69505	-1.24101	0.536162	0.481999	1.15672	-0.929533	1.03319	0.79348	0.249895	0.834712	0.0125643	0.0555013	Q7TNR6	Q7TNR6	Immunoglobulin superfamily member 21
-0.42455	0.0326334	-0.036481	-0.490406	0.209932	-0.405303	-0.131564	0.0385947	0.00896565	-0.0187147	0.333877	-0.143309	0.324847	0.18119	0.154866	0.0927755	-0.188224	0.38912	0.080794	0.0843951	-0.119936	-0.10884	0.209815	0.290024	0.294687	-0.15228	-0.245002	-0.237212	-0.270972	0.205742	0.0830369	-0.0425002	169431	13	1.26201	1.53189	0.445089	0.621027	-0.186172	1.18269	0.386845	1.00605	-0.244416	0.285793	0.55425	0.0129933	0.0546999	Q5H8C4	Q5H8C4	Vacuolar protein sorting-associated protein 13A
-0.215351	0.226788	0.0432657	-0.400825	-0.236376	-0.111425	-0.155615	-0.00207156	0.367679	-0.17224	-0.115072	0.0854353	0.473042	0.35886	-0.0572018	0.0451487	0.144417	0.0693244	-0.349359	0.167617	-0.171897	0.205163	0.392009	0.353297	-0.273135	-0.348024	0.337562	-0.418734	-0.0778333	-0.213981	0.175047	-0.125516	584070	20	1.03303	1.25817	0.330025	0.960488	-0.333885	0.952477	0.293116	1.21105	-0.370795	0.987846	0.759375	0.0132847	0.092676	D3YVF0	D3YVF0	A-kinase anchor protein 5
-0.303333	0.0753487	-0.278489	0.0180496	-0.128192	-0.0825245	-0.296029	-0.244537	-0.127937	-0.024968	0.0159964	0.293172	0.449591	0.470117	-0.183731	-0.062769	-0.305907	0.114518	-0.248197	0.329434	0.0560203	0.324644	0.453354	0.348761	-0.0987734	-0.2138	0.357056	-0.443536	-0.39502	-0.0564408	0.37878	-0.190658	1.1693e+06	9	1.03692	1.61106	0.369989	0.801831	-0.329624	1.48662	0.397379	0.78615	-0.302235	0.880127	0.722488	0.0134685	0.0918512	Q9ERF3	Q9ERF3	WD repeat-containing protein 61;WD repeat-containing protein 61, N-terminally processed
-0.403899	-0.125038	-0.0408958	0.150677	0.013328	0.0257176	-0.351031	-0.382517	-0.0606903	-0.117343	0.0636607	0.136545	0.531075	0.0810831	-0.35981	0.328197	-0.234308	0.247567	0.196073	1.20234	-0.254112	0.279896	0.236145	0.158808	0.119316	-0.249001	-0.678701	-0.143244	-0.547511	-0.0492484	0.0670481	0.159874	103313	3	1.11336	0.945089	0.319595	1.2224	-0.600464	1.35466	0.480407	0.886219	-0.439653	0.427896	0.907907	0.013548	0.0770268	P35285	P35285	Ras-related protein Rab-22A
-0.253371	0.114443	-0.532929	-0.888892	0.346389	-0.86702	-0.329956	-0.416891	0.283884	-0.177937	0.224951	-0.136291	0.341317	0.833355	-0.0484978	0.0441516	-0.0119241	0.0500087	0.339603	0.424967	0.150873	0.383177	0.116086	0.419681	-0.283516	-0.23637	0.354104	-0.958473	-0.0187105	0.118444	0.228309	0.387036	139989	8	1.15697	1.60755	1.22736	0.6965	-0.805019	1.86271	1.33644	0.562863	-0.695939	0.589322	0.414567	0.0137839	0.0696668	Q8R422	Q8R422	CD109 antigen
0.20273	0.474071	-0.679813	-0.255565	-0.383815	-0.320465	-0.548207	-0.650153	-0.526993	0.863171	0.682107	0.418826	0.361869	0.486386	-0.558964	0.928312	-0.688145	0.204372	1.15447	-0.268529	-0.303735	-0.0407573	0.832368	0.667747	-0.726292	-0.416491	-0.238342	-0.452396	-0.227525	-0.364385	1.12988	-0.75573	26880	2	1.04049	1.2866	0.877057	0.900369	-0.768708	0.870564	0.679101	1.27266	-0.966663	0.864019	0.649969	0.0138671	0.0910992	Q8BGW1	Q8BGW1	Alpha-ketoglutarate-dependent dioxygenase FTO
-0.229376	-0.327178	-0.632217	-0.363066	-0.224039	0.645985	-0.0079314	-0.506624	0.94057	-0.318	0.412744	0.148556	0.542361	0.832512	0.133305	-0.101688	-0.430504	0.502929	-0.321061	-0.424841	0.548551	-0.129698	0.966712	-0.180758	-0.255632	-0.287428	0.0285691	-0.343727	-0.426632	-0.585519	-0.117513	0.510636	17728	2	1.25251	NaN	0	NaN	0	NaN	0	NaN	0	0.296217	0.472399	0.014104	0.0559098	E9Q4N7	E9Q4N7
-0.212506	0.0233036	0.0460774	-0.346485	0.0359836	-0.0206044	-0.166971	-0.136319	-0.371117	0.0585525	0.0543261	0.217343	0.334288	0.492091	-0.0499248	0.0792263	-0.233922	-0.137754	0.339539	0.242602	-0.144863	0.291505	0.102539	0.409987	-0.346818	-0.155058	-0.0155194	-0.164575	-0.100377	0.20196	-0.0616823	-0.264829	780717	8	1.00231	0.939815	0.264587	1.20235	-0.309881	1.09838	0.27885	1.04229	-0.295619	0.838142	0.939695	0.0142082	0.0994703	P47757	P47757	F-actin-capping protein subunit beta
-0.055247	0.216239	-0.0807478	-0.288816	0.0360012	-0.408034	-0.141204	-0.0773971	0.047324	-0.0289695	0.00852535	-0.0751403	0.00341032	0.266256	0.162662	0.0385409	-0.0326022	0.131799	-0.111681	0.349038	-0.176581	0.0423856	0.334118	0.398806	0.0206929	0.0852411	0.0967743	-0.389129	-0.31728	0.0898262	0.0360724	-0.180884	283513	22	1.02642	1.19145	0.249409	0.967692	-0.270631	1.23532	0.315688	0.862194	-0.204353	0.91649	0.583236	0.0149644	0.0940985	A2CG49	A2CG49	Kalirin
-0.608779	-0.682233	-0.57049	-0.893766	-0.814682	-0.78571	-0.802646	-0.894113	-0.748399	0.448089	0.849117	0.865495	0.878697	0.475366	1.14326	1.81412	-0.775729	1.95902	-0.735213	-0.773827	0.667212	0.686332	-0.691635	-0.741955	0.830398	-0.769494	-0.765595	-0.874212	0.239029	1.16165	0.130094	0.780594	59834	3	2.57693	4.42225	2.76121	0.182448	0.364344	1.33871	1.3604	0.807361	-1.03647	0.00223668	0.729904	0.0154082	0.00264895	Q8K010	Q8K010	5-oxoprolinase
-0.658539	-0.175195	-0.301368	0.0929111	0.0766608	-0.564831	-0.268608	0.0583109	-0.36597	0.639676	0.509958	-0.0379227	0.192969	-0.0446329	0.219959	0.0483409	-0.0990184	0.595888	-0.222394	1.06582	-0.470108	-0.0387282	1.15732	-0.152517	-0.300688	-0.060307	-0.213975	-0.581624	-0.0074653	-0.26525	0.098722	0.0726103	17777	2	1.01293	NaN	0	NaN	0	NaN	0	NaN	0	0.694405	0.709487	0.0154223	0.0970671	Q91W92	Q91W92	Cdc42 effector protein 1
-0.45087	0.0921245	-0.0296889	-0.288656	-0.253324	0.0696611	-0.225304	-0.0251177	-0.236331	-0.135439	-0.191348	0.516201	0.311756	0.245198	0.0842593	0.140923	-0.186067	0.0492941	-0.0635669	0.0462106	0.228891	0.26328	0.411594	0.465839	-0.379453	-0.328292	0.20482	-0.612841	-0.432534	0.203266	0.0629719	0.442544	90146.3	12	0.996302	1.13305	0.338962	1.03311	-0.465348	1.74246	0.428525	0.740203	-0.375785	0.688286	0.866889	0.015428	0.100855	P39447	P39447	Tight junction protein ZO-1
0.0731262	0.068754	0.0298012	-0.357983	0.119232	-0.336916	-0.0250503	0.0360611	0.0593626	-0.0841737	0.291984	-0.0663381	0.366908	0.32085	0.0595124	0.105817	-0.243014	0.389365	0.0280627	-0.00974758	0.1243	0.00535664	0.161513	0.070642	0.213483	-0.200633	-0.490292	-0.358182	-0.489745	0.32393	0.191323	-0.37731	201272	6	1.23743	1.11708	0.26534	1.05838	-0.405306	0.615596	0.175587	1.41045	-0.495058	0.595344	0.230316	0.0156281	0.0578851	Q9JJ28	Q9JJ28	Protein flightless-1 homolog
-0.162424	0.645161	-0.44364	-0.481663	-0.121511	-0.3983	-0.167507	-0.208577	-0.304457	-0.074902	-0.364077	-0.0454632	-0.309172	0.241653	0.171805	-0.15788	0.386218	0.415251	1.54932	-0.303215	0.401656	0.100408	0.203821	0.636555	-0.307844	-0.059125	0.993792	-0.493567	-0.418108	-0.493282	-0.529037	0.098111	15740.7	3	1.74285	0.304357	0.157045	1.72883	-0.840322	1.99376	0.782219	0.335275	-0.215149	0.0889488	0.154737	0.0156983	0.018078	O89032	O89032	SH3 and PX domain-containing protein 2A
0.704421	-0.374763	0.0601053	0.806149	0.599319	-0.0204144	0.321037	-0.0942819	-0.0681482	0.159243	-0.358532	-0.471958	-0.485247	-0.72872	-0.144484	-0.156263	0.641952	-0.182761	0.00793207	0.213952	-0.0481536	-0.331616	-0.460746	-0.506308	-0.276812	0.137913	0.293283	1.42583	0.0567596	-0.0504336	-0.385421	-0.28283	74119.1	5	1.25449	1.84667	-0.83704	0.380581	0.254721	0.94633	-0.472721	1.12385	0.619041	0.18309	0.734152	0.0161759	0.0556555	Q9QZ06	Q9QZ06	Toll-interacting protein
-0.147676	0.125194	-0.285389	-0.0228836	0.111919	-0.222771	-0.154978	-0.0199351	-0.432683	0.130864	0.0879128	0.144657	-0.118455	0.356126	-0.0547999	-0.0273765	0.0666002	0.256909	-0.0115315	0.105984	0.1257	0.0924804	0.23537	0.433069	-0.153447	-0.210749	0.015006	-0.303081	-0.253498	-0.015012	0.0564256	0.0900508	79019.2	6	1.41994	0.303186	0.109178	2.49047	-0.374402	2.30659	0.341878	0.412144	-0.141702	0.171548	0.298622	0.0162103	0.0380246	Q5QNQ6	Q5QNQ6	Oxysterol-binding protein 2
0.236448	0.285684	-0.0951472	0.35547	-0.497992	0.299899	0.0766166	0.311573	-0.159884	-0.387878	0.0451323	-0.221035	-0.188859	-0.0122885	-0.203846	-0.468148	-0.360012	-0.105213	-0.27204	-0.225328	-0.384341	0.615367	-0.00815603	-0.0252808	0.0236497	-0.0859015	0.796746	0.117265	-0.414795	0.224068	-0.0378071	0.766034	62190.2	6	1.01538	1.36112	-0.457625	0.789248	0.36006	0.707588	-0.31658	1.42138	0.501105	0.762439	0.568347	0.0162193	0.0965204	P35288	P35288	Ras-related protein Rab-23
0.543085	-0.881766	-0.861301	-0.882952	-0.895419	0.162039	-0.857827	-0.587686	-0.836617	-0.491224	1.22467	1.26017	2.46863	1.87129	0.877812	-0.790316	-0.846589	2.05853	-0.799707	2.20011	0.847987	-0.86496	0.77523	-0.881523	-0.880794	-0.748817	-0.844619	1.76346	-0.679431	-0.84823	-0.773816	-0.799417	91537.4	2	1.08175	1.52514	2.03065	0.629226	-1.13994	0.63891	1.19339	1.56065	-1.97721	0.480074	0.533899	0.016616	0.0828419	P59708	P59708	Splicing factor 3B subunit 6
3.21924	-0.530283	-0.0908047	1.80033	-0.0524848	-0.488137	-0.138166	0.544791	0.469191	-0.414938	-0.71521	-0.282686	-0.682814	-0.658862	-0.222458	-0.621279	2.49692	-0.672048	-0.756709	-0.90453	-0.628234	-0.768754	-0.894872	-0.794459	0.734934	0.044117	-0.735226	1.46984	2.29892	-0.886707	-0.710926	-0.427701	143787	6	1.32873	1.46583	-1.14821	0.861535	1.31645	1.92106	-2.00085	0.297682	0.463818	0.863344	0.123747	0.0167325	0.0469108	Q80Z24	Q80Z24	Neuronal growth regulator 1
-0.0876195	-0.00529714	-0.12858	-0.421769	-0.268101	-0.305848	-0.0461587	0.0139138	0.413179	-0.103314	0.0311428	-0.086759	0.00365513	0.219433	0.171079	0.0852045	0.0782028	-0.0312936	-0.240068	0.0466188	-0.114847	0.23468	0.503353	0.0812305	-0.0357478	-0.139209	0.419931	-0.218994	-0.0728405	-0.0388838	-0.00503541	0.0487422	918214	21	1.44688	1.98399	0.380776	0.311824	-0.0982425	1.43952	0.339429	0.587204	-0.13959	0.145299	0.298374	0.0169207	0.0357375	Q9Z2Y3;REV__Q61043	Q9Z2Y3	Homer protein homolog 1
-0.322293	0.175359	-0.00503987	0.0174139	0.150228	-0.286357	0.27559	-0.153237	-0.255447	0.0684381	-0.119194	0.0565894	0.057832	-0.0854062	0.425126	0.0831528	0.448822	0.117742	0.387765	0.0430213	-0.168334	0.114971	0.353655	0.193705	-0.19055	-0.0474345	0.0324163	-0.71036	-0.280233	0.0976768	-0.0752306	-0.400387	104657	22	1.5513	0.209646	0.0786328	1.74057	-0.639975	1.10611	0.287069	1.02202	-0.431539	0.058444	0.615586	0.0174845	0.0280999	Q5SNZ0	Q5SNZ0	Girdin
-0.171904	0.531864	-0.207689	-0.904908	-0.621147	-0.680877	-0.590507	-0.227449	1.65885	-0.366098	0.168444	0.150322	0.653931	0.882041	0.149241	0.188205	-0.41817	-0.437012	-0.307047	0.720422	0.0297619	-0.214636	-0.320647	0.813521	0.765611	-0.526442	0.189385	-0.501963	-0.392905	-0.158403	0.485788	-0.339587	305158	6	1.6967	1.97419	1.42039	0.0864267	-0.0810027	0.964572	0.841742	1.15758	-0.659655	0.0323567	0.761759	0.0175419	0.0201048	Q9JHU2	Q9JHU2	Palmdelphin
-0.381917	0.202876	0.554671	-0.413841	-0.395408	0.184925	0.306916	0.0241257	-0.33873	-0.464232	0.102638	0.0481435	-0.455333	-0.122497	0.164123	-0.0172549	-0.512794	-0.563934	-0.611051	0.0894971	-0.697842	0.426417	0.635448	-0.478205	-0.318246	0.504566	0.830358	0.39211	-0.0680278	0.613639	-0.0629141	0.821775	35765.1	2	1.35755	0.330399	-0.19211	1.63208	0.957849	0.737078	-0.536771	1.58327	0.613188	0.10406	0.868051	0.0175896	0.0438985	Q60739	Q60739	BAG family molecular chaperone regulator 1
-0.242694	0.0996303	-0.38469	-0.368783	-0.406139	-0.0787402	-0.353497	-0.303477	0.305859	-0.370479	-0.180592	0.24664	0.486926	0.500741	-0.190468	0.072358	0.144959	-0.336516	-0.35625	0.337843	-0.167153	0.686103	0.756764	0.487868	-0.0595351	-0.272172	0.459766	-0.501902	-0.00122189	-0.340908	0.0357192	0.294041	5.30578e+06	10	1.17837	1.80969	0.543946	0.54557	-0.306404	1.6908	0.614185	0.455748	-0.236165	0.489162	0.274174	0.0181711	0.0663172	Q8BLQ9	Q8BLQ9	Cell adhesion molecule 2
-0.737178	0.276089	0.364474	-0.765051	-0.770289	-0.0178831	-0.840267	-0.36877	0.141915	-0.229621	0.142435	-0.0782166	0.49378	0.75657	-0.124737	-0.362131	-0.356087	0.186482	-0.39026	1.00199	0.190817	0.376623	0.110475	0.785569	0.200692	-0.580615	1.02092	-0.262482	-0.13307	-0.399219	0.290909	0.0761341	65519.7	5	1.77214	1.51198	1.13951	0.437308	-0.310107	1.68349	1.28444	0.225679	-0.16518	0.162904	0.0632889	0.0183502	0.016899	Q8R0P4	Q8R0P4	Mth938 domain-containing protein
-0.0515646	0.184444	-0.0301705	-0.557023	-0.640852	-0.238717	-0.119625	-0.404613	0.129534	-0.493423	0.184797	-0.11331	0.412761	0.620954	-0.601619	0.15856	-0.340722	0.194621	-0.416797	0.624479	0.12722	0.820029	1.08684	1.13619	-0.0743532	-0.0728056	0.0347315	-0.73135	-0.702476	-0.271728	0.649307	-0.503323	65251.7	5	1.11238	0.610063	0.399931	1.36697	-0.916532	1.58682	0.828059	0.596732	-0.488404	0.335886	0.524958	0.0187558	0.0772001	P70407	P70407	Cadherin-9
0.0613615	0.200671	0.493138	-0.0449339	-0.129145	0.142005	-0.0646455	-0.366869	-0.382774	-0.10346	-0.220268	-0.278524	0.292129	-0.247411	-0.225389	-0.170021	-0.223761	-0.457768	-0.404358	-0.0708444	-0.146829	-0.144365	-0.269189	0.69267	0.389565	0.587426	-0.125737	0.439113	-0.206208	-0.382188	0.0963303	1.27028	16625	2	1.01467	1.03881	-0.307406	1.02942	0.50117	0.697919	-0.293388	1.28745	0.515188	0.557088	0.50191	0.0194214	0.0966781	Q9WU42	Q9WU42	Nuclear receptor corepressor 2
-0.408709	0.0841653	-0.0880785	-0.350582	0.336582	-0.264309	-0.230682	-0.0239049	-0.520058	0.0536318	0.296672	0.133465	0.673515	0.0838887	0.0555991	-0.00692078	0.0636529	0.276723	0.0331861	0.471013	-0.0828856	0.0853844	0.207528	0.0904472	-0.46441	-0.266185	0.191487	-0.372917	-0.361533	0.250913	0.180142	-0.126822	76246.7	5	0.931323	0.651886	0.291726	1.46695	-0.435573	1.67036	0.408818	0.655411	-0.31848	0.629056	0.761315	0.0198939	0.117132	Q3UKC1	Q3UKC1	Tax1-binding protein 1 homolog
-0.143039	-0.0379073	0.000962646	-0.162367	0.00475325	-0.157775	0.0622585	-0.120294	-0.0241852	0.120083	-0.076724	-0.0677012	0.0304357	0.13749	-0.0605459	0.0390857	-0.163916	0.0531817	0.0650879	0.253619	-0.010143	0.0181546	0.26873	0.230501	-0.110095	0.0142572	0.214749	-0.210475	-0.105663	0.0972843	-0.106304	-0.0534985	187290	15	1.13469	1.13171	0.122203	0.947986	-0.170525	1.61842	0.219844	0.414831	-0.0728848	0.687713	0.227009	0.0203068	0.0733355	Q8BIK4	Q8BIK4	Dedicator of cytokinesis protein 9
0.789431	0.0817333	-0.373282	0.106773	0.168982	-0.633423	-0.187292	0.154813	0.388512	-0.167398	0.122786	-0.140902	0.592806	0.212558	0.182085	-0.00532122	0.851932	-0.820216	-0.451923	-0.836744	-0.157731	-0.943187	-0.269776	-0.910594	0.569901	-0.0060981	0.389579	0.496044	0.797291	-0.250987	0.13385	0.115798	103038	6	2.91907	0.49369	0.278684	2.11234	1.98214	1.46029	-1.56279	0.338784	0.140671	0.00290672	0.0496161	0.0204181	0.00120485	Q60737	Q60737	Casein kinase II subunit alpha
-0.624483	1.63849	-0.685368	-0.594073	0.473735	-0.53645	0.194428	0.282828	-0.451575	-0.268747	-0.720909	-0.347373	-0.233782	-0.63351	-0.310056	-0.575211	-0.0255094	-0.329589	0.132935	-0.216575	-0.655143	-0.750684	-0.388879	-0.0293739	-0.596056	2.61831	-0.261199	1.8351	-0.220533	0.104574	1.81907	0.355606	34378	4	1.36483	0.637328	-0.557703	1.33558	1.0515	0.231293	-0.270401	2.06541	1.3388	0.457186	0.11404	0.0204711	0.043169	O88444	O88444	Adenylate cyclase type 1
-0.199658	0.165016	0.015987	-0.187227	-0.345433	-0.0363467	-0.239326	-0.332769	0.450755	-0.144072	0.245931	-0.0844923	-0.0147689	0.192631	0.292709	-0.0551864	-0.151318	0.0629257	-0.262505	0.269279	-0.0985828	0.12959	0.811208	0.0759686	-0.26947	-0.257836	0.240456	-0.515428	-0.187146	-0.057118	0.220972	0.265254	124204	9	0.9002	1.73657	0.38047	0.599741	-0.264819	1.16803	0.345631	0.822909	-0.299657	0.663804	0.86262	0.0207391	0.125835	Q6PHU5	Q6PHU5	Sortilin
-0.508266	-0.654224	0.114211	0.0192232	-0.0285888	-0.277875	0.356351	0.279528	-0.0950645	0.448163	0.218918	0.61946	-0.0457393	-0.221801	-0.511262	0.355259	1.70112	-0.236145	-0.0207198	-0.0250106	-0.394056	-0.0921466	0.766126	0.626549	-0.506298	-0.398835	-0.105763	-0.683208	-0.024549	-0.537957	-0.126451	-0.0109457	18326	2	1.08752	0.450143	0.304553	1.57248	-0.821396	0.680497	0.4659	1.38231	-0.660049	0.270553	0.676084	0.0208595	0.0817483	P0C090	P0C090	Roquin-2
-0.237489	0.0900885	-0.0512968	-0.293008	-0.227108	-0.193975	-0.196695	-0.16008	0.0380179	-0.0214148	0.0799069	0.164844	0.115758	0.230412	-0.167609	-0.0328899	-0.333868	0.0946319	-0.0839978	0.457498	0.180631	0.0766224	0.315051	0.181029	-0.183196	-0.299077	0.255353	-0.242232	-0.0725898	0.306228	0.197313	0.0131439	301517	10	1.27764	2.40327	0.323906	0.424348	-0.15798	1.75065	0.379478	0.330451	-0.102407	0.40641	0.170265	0.0208886	0.0527669	Q9WV60	Q9WV60	Glycogen synthase kinase-3 beta
0.27452	-0.0910613	0.258095	0.626033	0.153691	0.663795	0.0495567	-0.133738	-0.13522	0.140767	-0.222997	-0.249788	-0.466909	-0.286272	-0.341005	0.038921	-0.0895134	-0.0843977	0.65868	-0.482451	-0.142152	-0.346693	-0.0605011	-0.30512	0.136662	0.0259297	-0.326054	0.197311	0.960917	0.283808	-0.550882	-0.153933	148558	4	1.09545	2.37714	-0.598387	0.346544	0.222684	1.44992	-0.497683	0.633377	0.323388	0.273053	0.608062	0.0211117	0.0802697	Q6PF93	Q6PF93	Phosphatidylinositol 3-kinase catalytic subunit type 3
-0.44504	0.011167	-0.077394	-0.256543	-0.192556	-0.020214	-0.423006	-0.350898	0.378728	-0.0992166	-0.0684282	0.253289	0.0225009	0.111949	-0.254176	-0.286529	0.0235586	-0.143497	-0.202283	0.51398	0.295371	0.0854313	0.644663	0.391586	-0.21882	0.149674	0.0235586	0.417849	-0.359398	-0.0887706	0.141639	0.0218238	2.3645e+06	6	1.79766	1.32881	0.367922	0.678195	-0.242586	2.35837	0.612609	0.0041531	0.00210142	0.620227	0.0204407	0.021237	0.0159347	Q91WS0	Q91WS0	CDGSH iron-sulfur domain-containing protein 1
-0.249885	0.550292	-0.327613	-0.0599278	-0.578763	-0.698483	-0.402494	-0.219221	0.617285	-0.340464	0.539176	0.0912033	0.370414	0.541612	-0.0606434	-0.0426166	-0.200264	-0.18548	-0.18277	0.486114	0.0309092	0.105043	0.0176171	0.239609	-0.168154	-0.179938	-0.223819	0.421359	0.0913548	-0.470492	0.52194	-0.0329025	656780	2	1.4779	1.69457	0.786023	0.202605	-0.103582	1.28374	0.588265	0.644421	-0.30134	0.0723555	0.438986	0.0215565	0.0332738	Q9CQX8	Q9CQX8	28S ribosomal protein S36, mitochondrial
-0.403417	0.162153	0.950536	0.866416	0.711038	0.761052	0.885586	-0.312127	-0.633535	1.95356	-0.732723	-0.475823	-0.452108	-0.359396	0.0675001	-0.617952	0.141235	-0.500079	1.10604	-0.59455	-0.713208	-0.388271	-0.733477	-0.574902	-0.402123	1.80282	-0.475712	0.369188	-0.268074	-0.1368	-0.341527	-0.661324	31870.7	3	1.23314	1.52311	-1.1035	0.51296	0.51619	1.9115	-1.24907	0.321808	0.370624	0.386518	0.198931	0.0219606	0.0584596	Q9WU40	Q9WU40	Inner nuclear membrane protein Man1
-0.298647	0.0855066	-0.280149	-0.14532	-0.108718	-0.555898	-0.114378	-0.128609	0.201089	-0.118829	-0.0251002	0.0405256	0.216021	0.175005	-0.203665	0.0970268	0.31824	0.0734317	-0.0611389	0.230215	-0.311257	0.0587763	0.417508	0.328379	0.00172176	-0.271337	0.311603	-0.134803	-0.290785	-0.0436262	0.300358	0.236852	108493	7	1.49761	1.65079	0.403435	0.440107	-0.164055	1.78835	0.496415	0.194065	-0.0710745	0.31668	0.0807971	0.0224146	0.0317969	Q14CH0	Q14CH0	Protein FAM171B
-0.505556	0.0971633	0.057572	-0.200381	-0.529988	-0.0519611	-0.300961	-0.257228	0.217379	-0.451879	0.299277	0.0670464	0.668124	0.546751	-0.0388982	-0.0854986	-0.106158	0.157514	-0.593945	0.528842	0.00226909	0.845738	0.160315	0.565969	-0.343385	-0.666939	0.376045	-0.631708	-0.394765	-0.38083	0.462219	0.487858	59634.7	6	0.839648	1.3601	0.538118	0.78345	-0.572319	1.08374	0.543291	0.874105	-0.567145	0.941207	0.958974	0.0224542	0.144661	Q61220	Q61220	Protein kinase C-binding protein NELL2
-0.497303	0.616118	-0.00122668	-0.333736	0.246038	-0.477486	-0.235595	-0.0696198	-0.387599	0.10031	0.733946	0.117634	0.233486	0.269552	0.218311	0.160837	-0.218443	0.397698	0.170852	0.043953	-0.131092	-0.214274	0.335366	0.158214	-0.188609	-0.434585	-0.617617	-0.346374	-0.33941	0.718643	0.384672	-0.41266	232625	8	0.922161	0.972122	0.441274	0.942595	-0.466902	0.669314	0.311716	1.22267	-0.596461	0.946311	0.456585	0.0228808	0.11963	Q924M7	Q924M7	Mannose-6-phosphate isomerase
-0.730542	0.142958	-0.453832	-0.420889	-0.411477	-0.425323	-0.378551	-0.729686	0.316659	-0.0482825	0.515827	-0.173745	0.361112	0.552104	-0.377636	0.11568	-0.517117	0.904987	0.0349587	-0.30321	0.236251	0.146573	0.0133817	0.288243	-0.350551	0.901151	0.311247	0.439944	0.197608	0.144164	0.128048	-0.430057	23206.5	4	2.72091	2.65674	1.08755	0.121077	0.092813	2.05987	0.974141	0.0275737	-0.0205916	0.00801511	0.0287034	0.0229761	0.00190147	Q9ER88	Q9ER88	28S ribosomal protein S29, mitochondrial
0.581017	-0.431809	0.41674	0.604659	0.305435	0.284474	0.490267	0.0474029	0.167402	0.0959871	-0.860449	-0.403585	-0.807248	-0.886439	0.0992377	-0.254452	1.1195	-0.478622	0.0331042	-0.680935	-0.29583	1.57407	-0.598783	-0.82158	0.250026	0.095906	-0.745174	0.440464	0.75236	-0.51675	0.487828	-0.0642272	123085	5	1.0756	1.75188	-1.43128	0.353508	0.456112	0.953634	-0.852669	0.961443	1.03472	0.224982	0.818504	0.0232118	0.0840229	Q9WUR9	Q9WUR9	Adenylate kinase 4, mitochondrial
-0.534107	0.232893	-0.19613	-0.667311	-0.0908705	-0.464151	-0.27583	0.128971	-0.525931	-0.321831	-0.156739	0.667151	0.892303	-0.19636	0.3056	0.316566	-0.194755	-0.0119357	-0.151276	0.331696	0.47734	-0.0749385	0.457817	0.941246	-0.541328	-0.572925	-0.23896	-0.0372668	-0.336349	0.332957	0.459	0.0454509	26173.4	3	0.958599	0.874341	0.533915	1.05611	-0.520831	1.66954	0.72862	0.45583	-0.326125	0.976449	0.367351	0.0232318	0.110002	Q9D7N6	Q9D7N6	39S ribosomal protein L30, mitochondrial
-0.714936	0.678108	-0.182211	-0.674544	-0.55877	-0.635272	-0.526518	-0.27289	-0.00693555	-0.388716	0.404817	0.71697	0.984675	0.553424	-0.200982	-0.0500937	-0.768407	-0.0706485	-0.271403	1.12241	0.126999	-0.0919299	0.114243	1.2497	-0.330158	-0.728323	0.11431	-0.596972	-0.498296	1.33912	0.42894	-0.265719	302609	2	1.05583	2.06253	1.1155	0.336389	-0.385603	1.06266	0.86492	0.830845	-0.636181	0.253811	0.717761	0.023493	0.0879359	P63087	P63087	Serine/threonine-protein phosphatase PP1-gamma catalytic subunit
-0.217886	0.0702763	0.12171	-0.0957208	0.455959	-0.448897	0.00940351	-0.271627	-0.200321	0.22521	0.148975	0.168846	0.244923	0.0934506	0.180486	0.324251	0.0704334	0.213779	0.237794	-0.0275084	-0.0178605	-0.157119	0.412126	-0.139659	-0.151928	0.202245	-0.518184	-0.162099	-0.772528	0.201039	0.0036363	-0.203205	190727	4	1.10209	1.03807	0.310358	0.971472	-0.516065	0.572604	0.206361	1.266	-0.620062	0.555776	0.240502	0.0235236	0.0790514	Q71RI9	Q71RI9	Kynurenine--oxoglutarate transaminase 3
0.482794	-0.319565	0.935587	0.560471	0.154619	0.603754	0.0454099	-0.252822	-0.406998	0.0742228	-0.549935	-0.282126	2.18765	-0.645428	-0.418446	-0.203591	0.448397	-0.489506	0.242335	-0.830896	-0.225095	-0.28359	-0.274139	-0.879209	-0.275132	0.101719	-0.1622	1.19434	0.0631403	-0.145714	-0.141782	-0.308263	95650.5	6	1.0786	0.954964	-0.669305	0.958464	0.838761	1.45009	-1.14841	0.428077	0.359653	0.789782	0.220628	0.0235346	0.0834453	Q91WJ8	Q91WJ8	Far upstream element-binding protein 1
0.100305	0.102927	-0.0664018	0.217961	0.147608	0.125486	0.0207754	0.0184811	0.0462835	0.0967542	-0.0736117	-0.0290952	-0.0882506	-0.0827337	-0.0534015	-0.093111	-0.0190442	-0.0987383	-0.116435	0.0388006	-0.0192634	-0.0603926	-0.049196	-0.100922	0.0455188	-0.094587	-0.18575	0.301586	0.112212	-0.0578799	-0.133478	0.0475942	1.83077e+06	29	1.29235	1.99781	-0.165287	0.404166	0.0722592	2.68922	-0.191929	0.221193	0.0456169	0.356556	0.151539	0.0236215	0.0510094	Q8VDN2	Q8VDN2	Sodium/potassium-transporting ATPase subunit alpha-1
-0.293756	0.164768	0.0271727	-0.363605	-0.332311	-0.10374	0.0254115	-0.133492	-0.0993784	-0.18079	0.0611862	0.209125	0.402943	0.496181	-0.191695	0.152803	-0.228569	0.109726	-0.198417	-0.0661641	0.466209	0.21775	0.169389	0.335497	-0.163244	-0.137854	0.00988585	-0.547698	-0.126809	-0.0981977	0.230455	0.187216	499799	23	0.833541	1.21567	0.33689	0.747468	-0.279619	1.18723	0.330467	0.769178	-0.286042	0.825671	0.864315	0.0236403	0.14671	Q6PGL7	Q6PGL7	WASH complex subunit FAM21
0.062011	0.22473	0.00946894	0.963254	0.0592024	0.127667	0.309349	-0.0555307	-0.424894	0.262485	0.13001	-0.418126	-0.286583	-0.0901703	-0.23931	0.0480102	0.650186	-0.776394	0.0705693	-0.479634	-0.0350083	-0.130544	-0.496779	-0.729322	-0.378189	1.019	-0.448516	1.43249	0.200395	-0.345398	-0.226706	-0.00771939	68707.4	4	1.11956	1.6495	-0.493257	0.808015	0.679224	1.56213	-0.917566	0.356612	0.254915	0.708111	0.188548	0.0241074	0.0759341	Q8BX10	Q8BX10	Serine/threonine-protein phosphatase PGAM5, mitochondrial
0.278526	0.479458	0.613526	-0.235746	0.134714	0.336887	0.335841	-0.032264	-0.434756	0.348659	-0.873032	0.631707	-0.861702	-0.78842	0.580825	0.258448	0.0329655	-0.554942	-0.765844	-0.681881	0.506664	-0.166764	-0.722688	-0.727339	0.425176	0.220596	-0.803608	1.97056	0.302671	0.459184	0.548126	-0.815542	76453.7	4	0.887166	1.1212	-1.11984	0.783219	0.925603	2.38695	-1.30732	0.450638	0.738119	0.822916	0.513374	0.0244177	0.129668	Q9CZX9	Q9CZX9	ER membrane protein complex subunit 4
-0.353448	0.064817	-0.231716	-0.0288088	-0.775333	-0.0127613	-0.381145	-0.2134	0.437892	-0.290635	0.11951	-0.0356449	0.477012	0.367055	0.394403	-0.327259	-0.372572	-0.487456	-0.169949	0.691988	0.50284	0.53427	0.463623	0.33648	0.00584918	-0.239237	0.322047	-0.360075	-0.264447	-0.103699	-0.0537342	-0.0164651	105314	8	1.05376	1.3194	0.654112	0.554029	-0.294811	1.08835	0.64985	0.807665	-0.299072	0.376218	0.387489	0.0246473	0.0883561	Q9D5V6	Q9D5V6	Synapse-associated protein 1
0.0790439	-0.69293	-0.138534	1.27983	1.28816	0.00980661	0.5994	0.408875	-0.798409	0.294103	-0.870603	0.123496	-0.741253	-0.793122	-0.0373097	0.380698	0.925381	-0.202548	0.109136	-0.614421	-0.128607	-0.453304	-0.739206	-0.66789	0.429748	0.465544	-0.582165	1.62654	0.27348	-0.554481	-0.621618	0.343155	48051.8	2	0.93283	1.29018	-1.28677	0.564071	0.576647	1.04984	-0.870808	0.868356	0.992614	0.374723	0.878146	0.0250786	0.116727	Q9CZN8	Q9CZN8	Glutamyl-tRNA(Gln) amidotransferase subunit A, mitochondrial
-0.564715	-0.0290783	-0.13109	-0.410365	-0.15958	0.378445	-0.0872638	-0.178512	-0.169524	0.0958022	0.0570277	0.319646	0.30845	0.236021	-0.0471685	-0.0509465	-0.573726	0.0960072	0.0925713	0.537391	-0.0341986	0.229012	0.859538	0.341013	-0.495766	-0.0228889	0.180043	-0.590815	-0.627109	0.355008	0.150779	-0.0640077	43945.9	11	0.802929	1.28148	0.412893	0.811508	-0.520645	0.875064	0.453306	0.980603	-0.480231	0.787965	0.946385	0.0259031	0.157424	P97393	P97393	Rho GTPase-activating protein 5
-0.324477	0.0622234	0.108441	-0.545284	-0.11765	-0.307529	-0.064988	-0.290767	-0.108018	-0.10264	0.0650372	0.22352	0.473502	0.162604	-0.0337799	0.127205	-0.310406	-0.0611109	-0.150359	0.158914	0.129456	0.0358925	0.664884	0.172048	-0.0325285	-0.0121406	0.0944317	-0.251553	-0.103265	0.0646627	0.104502	0.169171	159891	7	1.47508	1.76142	0.4664	0.199052	-0.0740807	1.24161	0.414016	0.54755	-0.126464	0.09889	0.221232	0.0259566	0.0334904	Q9CWK8	Q9CWK8	Sorting nexin-2
-0.469631	0.130404	-0.150741	-0.60706	0.325946	-0.368786	-0.502155	-0.460583	0.0965573	0.184179	0.29848	0.366846	0.213154	0.379907	-0.0343991	-0.363311	0.169169	-0.275318	-0.201454	0.0306729	-0.514358	0.429923	1.39063	0.473328	0.0978105	0.229532	0.0579315	-0.711477	-0.596783	0.350328	0.152791	-0.121534	43105.8	8	0.914171	1.86673	0.715126	0.442981	-0.363555	1.16261	0.65566	0.686855	-0.423021	0.451711	0.617484	0.0265387	0.121851	Q68ED2	Q68ED2	Metabotropic glutamate receptor 7
-0.287855	0.0948383	-0.0942643	-0.311318	-0.0210258	-0.0521486	-0.16124	-0.181289	0.0204711	-0.120683	-0.0178004	0.105643	0.349951	-0.0279605	0.0373493	0.0551146	-0.253588	-0.00648512	0.214036	0.128165	-0.0869267	0.126365	0.256528	0.264132	-0.245955	-0.178656	0.340381	-0.00874309	-0.0932159	0.125048	-0.00949634	0.0406295	372073	13	1.17579	1.72003	0.271887	0.414036	-0.117406	1.55247	0.302582	0.34666	-0.0867119	0.361287	0.205245	0.02671	0.0667122	Q64727	Q64727	Vinculin
-0.300187	0.498888	-0.812808	-0.649227	-0.639285	-0.665316	0.332039	0.336856	-0.707574	-0.509832	0.343167	0.370288	0.359883	0.811389	0.147102	0.256696	0.247206	0.87871	-0.124716	0.196624	0.191879	0.0895352	0.865052	-0.345133	-0.0550815	0.413982	-0.45073	0.93329	-0.283808	-0.435759	-0.661366	-0.631765	41516.8	2	0.895148	0.775592	0.747925	1.17782	-0.720838	1.40618	1.00478	0.498831	-0.46398	0.96594	0.396984	0.0268657	0.127307	Q9CWN7	Q9CWN7	CCR4-NOT transcription complex subunit 11
-0.612185	0.901787	-0.315373	-0.589418	-0.618537	-0.243558	-0.467749	-0.196218	-0.186428	-0.488722	0.353829	0.174432	0.802843	0.316975	-0.198742	0.0193803	-0.553603	0.0483806	-0.343155	0.163032	0.0733773	0.761138	0.878095	1.09213	0.141538	-0.463485	-0.0708401	-0.458003	-0.645391	0.604432	0.355156	-0.235117	45965.2	2	0.949903	1.25013	0.705896	0.649713	-0.483478	1.31807	0.837136	0.513919	-0.352239	0.665692	0.349234	0.0269297	0.112227	Q8BUV8	Q8BUV8	Protein GPR107
-0.192866	0.290636	0.143261	-0.424689	-0.136445	-0.433514	-0.157801	-0.190901	0.542331	-0.129995	0.544476	-0.093786	0.350924	0.247852	-0.40445	0.0955656	-0.110525	0.267859	-0.215785	-0.119322	0.414161	-0.041804	0.172111	0.466679	0.3344	-0.220769	-0.342713	-0.270921	-0.629655	0.180507	0.471146	-0.405968	1.1196e+06	3	0.766804	1.01518	0.397123	0.826877	-0.406559	1.15567	0.373725	0.793653	-0.429957	0.978514	0.872514	0.0281905	0.171079	Q9CR21	Q9CR21	Acyl carrier protein, mitochondrial
-0.180874	0.266182	-0.105215	-0.071519	-0.152841	-0.445616	-0.324249	-0.11131	0.113578	0.317647	0.225368	0.0511024	0.375546	0.328089	-0.194373	0.0868964	-0.307154	0.328299	0.0195585	0.196683	0.0622181	-0.149245	0.0468089	0.4461	0.203432	-0.038689	0.150173	-0.791511	-0.627633	0.190459	0.172004	-0.0799139	94820.5	28	0.814588	2.01423	0.454608	0.625884	-0.441747	1.12965	0.332507	0.894975	-0.563848	0.973809	0.556033	0.028548	0.153254	E9PVZ8	E9PVZ8
-0.517948	0.134968	-0.0507927	-0.109909	-0.0484255	-0.070749	-0.0804271	-0.134903	-0.0218057	-0.0618216	0.0384693	0.0789704	0.277005	0.210549	-0.111611	-0.121869	-0.279784	0.123178	0.0648995	0.265596	0.250099	-0.0112532	0.15845	0.328724	-0.225155	-0.0797424	-0.0244674	-0.164803	-0.0808841	0.261698	0.0882868	-0.0845441	105184	6	0.970442	0.916375	0.241401	0.889742	-0.203466	1.23131	0.334168	0.511618	-0.110699	0.84572	0.257068	0.0289085	0.107043	Q9QXG2	Q9QXG2	Rab proteins geranylgeranyltransferase component A 1
0.203972	-0.411662	-0.590626	1.49475	0.682151	-0.102833	0.455108	0.0846084	0.0837341	-0.0775619	-0.841769	-0.449707	-0.792848	-0.787568	-0.244871	0.139971	0.954233	-0.639288	0.00786411	-0.604983	0.57932	-0.465772	-0.286575	-0.635951	-0.215525	0.36958	-0.681966	2.45024	0.995162	-0.25204	-0.172106	-0.247045	68656.1	5	0.927784	1.35586	-1.12868	0.496494	0.519562	0.691743	-0.601035	1.09165	1.0472	0.402251	0.53833	0.0290177	0.118091	P35278	P35278	Ras-related protein Rab-5C
-0.153118	-0.121344	0.346099	-0.0400091	0.5724	0.875164	1.09683	-0.0849941	-0.637764	0.290976	-0.353781	0.410825	-0.617645	-0.300754	0.23841	-0.587747	0.352333	-0.685299	0.113452	-0.540209	0.375387	0.0813554	-0.565704	-0.466333	-0.139863	-0.24716	0.619097	-0.615097	0.403833	0.561224	0.211017	-0.391586	35611.8	3	0.91969	1.48492	-0.818311	0.465835	0.389647	1.34067	-0.772312	0.547977	0.435645	0.421661	0.527059	0.0292355	0.120312	Q3UZV7	Q3UZV7	UPF0577 protein KIAA1324-like homolog
-0.280684	-0.0923764	-0.109772	0.115493	-0.0641459	0.0817567	-0.0678356	-0.0895654	-0.0502646	0.0538766	0.0439186	0.100734	0.126973	0.0456757	-0.128867	0.00572998	-0.0524305	0.059557	-0.02133	-0.00938115	0.187243	0.1439	0.264206	0.173245	-0.0751567	-0.0393703	0.0582691	-0.496327	-0.086695	0.0760156	-0.0380231	0.165631	1.70732e+06	30	0.847748	0.955405	0.136508	0.936623	-0.238715	1.68863	0.226946	0.519969	-0.148278	0.53666	0.633901	0.0293298	0.141988	Q9WV92	Q9WV92	Band 4.1-like protein 3;Band 4.1-like protein 3, N-terminally processed
-0.216441	0.055754	-0.18827	-0.403611	-0.215046	-0.136023	-0.324805	-0.174456	-0.0330282	-0.145808	-0.00701404	0.0549029	0.279995	0.236864	-0.246906	0.0300573	-0.199098	0.110033	-0.184297	0.359902	0.00733383	0.151395	0.336861	0.438789	-0.0284433	0.0422931	0.24549	-0.284193	0.0123511	0.15548	0.0266068	0.243333	881019	32	2.12739	1.87527	0.351408	0.255319	-0.0883451	2.33475	0.482653	0.130054	0.0429001	0.181141	0.0105769	0.0295965	0.00745773	Q9ES97	Q9ES97	Reticulon-3
-0.853373	0.746857	-0.822914	-0.708372	-0.826934	-0.687034	-0.818024	-0.594404	0.779135	-0.609593	0.919299	0.94413	0.873778	0.78894	-0.846353	0.36456	-0.843471	0.695558	-0.687474	0.681577	0.381834	0.86514	-0.330827	0.409886	-0.786388	-0.780791	0.860104	0.226826	-0.709567	0.0411751	0.473993	0.852726	55577.6	2	1.4092	1.98421	1.884	0.139068	-0.242799	1.61953	1.58086	0.354485	-0.545936	0.0888097	0.275702	0.0301137	0.0389762	Q9D0J4	Q9D0J4	ADP-ribosylation factor-like protein 2
-0.293558	-0.0223392	-0.259034	-0.377399	-0.284209	-0.128821	-0.255855	-0.355052	-0.219049	0.184774	0.0713924	0.302272	0.640427	-0.183651	0.718736	-0.073268	-0.579202	0.115676	-0.13153	-0.12604	0.791048	0.191419	0.921731	-0.205612	-0.368152	-0.368405	0.164546	-0.0644551	-0.374004	0.0518152	0.201642	0.314156	27685.5	6	1.01466	2.51057	0.606483	0.241131	-0.170062	0.984914	0.450705	0.785789	-0.32584	0.210844	0.716825	0.030517	0.0966803	Q8K2Q9	Q8K2Q9	Shootin-1
-0.0415295	0.1563	-0.288666	-0.248943	-0.356513	-0.144048	-0.262887	-0.309585	0.0891443	-0.200582	0.313124	0.146494	0.180444	0.243589	0.510507	-0.22948	-0.354418	0.266099	0.00549463	0.309185	0.00237421	0.440751	0.556195	-0.352346	-0.439538	-0.297654	0.86256	-0.610609	-0.340965	-0.0693884	0.254806	0.210084	134610	7	0.761654	2.03916	0.469279	0.493898	-0.319804	1.20222	0.404776	0.705396	-0.384307	0.670189	0.953419	0.0309531	0.17312	D3YZP9	D3YZP9	Coiled-coil domain-containing protein 6
-0.253218	0.293339	-0.316075	-0.448193	-0.480441	-0.298289	-0.232053	-0.0112355	0.466686	-0.39555	0.235007	0.337253	0.543179	0.385901	-0.189658	0.0836817	-0.507406	0.328009	-0.3076	0.0705071	0.275838	0.264612	0.184267	0.316231	-0.111756	-0.410717	0.42068	-0.402	-0.145423	-0.106153	0.407142	0.00343473	90857.9	3	1.0031	1.71947	0.596028	0.288657	-0.168287	1.08468	0.449395	0.686898	-0.31492	0.21552	0.693365	0.0314897	0.0992896	Q63918	Q63918	Serum deprivation-response protein
-0.506807	0.0532834	-0.799141	-0.178139	-0.420727	0.0345691	0.0494949	-0.112122	0.343566	0.224621	-0.0229135	0.168133	0.793666	0.0895636	-0.533597	0.107972	-0.177833	-0.120006	0.0374008	0.161934	0.332238	0.167904	0.133843	0.427838	-0.585598	-0.0701777	0.0805705	-0.256134	0.354942	0.332008	0.0681706	-0.178521	26129.7	6	1.04579	1.09751	0.663448	0.628339	-0.270386	1.38703	0.689948	0.404197	-0.243886	0.349962	0.289914	0.0319065	0.0899925	F8VPZ3	F8VPZ3	Ubiquitin carboxyl-terminal hydrolase
-0.043831	-0.799364	0.0898927	-0.404026	-0.335502	-0.564368	-0.070176	-0.00569997	0.192586	-0.277893	-0.306531	0.155191	2.33754	0.19851	0.162489	-0.0916771	-0.42392	-0.290836	-0.131131	2.25531	-0.194601	0.670104	-0.204708	-0.347572	0.456707	-0.426762	-0.455346	-0.477288	-0.238567	-0.0261809	-0.36729	-0.0350673	17776.5	2	0.836736	NaN	0	NaN	0	NaN	0	NaN	0	0.399803	0.96891	0.0319838	0.145634	Q9JIG8	Q9JIG8	PRA1 family protein 2
-0.24157	0.168308	-0.00274308	-0.672049	-0.32402	-0.386597	-0.591372	0.191602	-0.0261029	-0.0089946	-0.179553	0.745981	0.191404	0.564105	-0.0211675	0.183376	-0.0959511	0.293397	-0.342083	0.374958	0.0823384	-0.22285	-0.0469621	0.593025	0.251909	-0.694572	-0.0831532	-0.447562	0.455828	-0.666682	0.544726	0.413025	30394.4	3	0.825636	1.6674	0.709069	0.419651	-0.339897	1.17238	0.566122	0.679363	-0.482844	0.433686	0.859083	0.0319995	0.149405	Q3UY34	Q3UY34	Uncharacterized protein C12orf43 homolog
0.0214526	0.0938792	0.450326	0.247039	-0.379564	-0.515221	-0.222762	-0.200914	0.210824	-0.0891318	0.387477	-0.0562111	0.0759234	0.388899	-0.138364	-0.102899	0.00693825	0.114529	0.0575168	-0.259971	0.374234	-0.184603	0.144833	0.78717	-0.0647407	-0.27444	-0.457512	0.0393359	-0.537383	0.12478	0.270607	-0.312045	1.33653e+06	11	0.786091	0.642851	0.267969	1.10896	-0.441549	0.658239	0.3019	1.14521	-0.407618	0.585412	0.739288	0.032083	0.163647	Q9CQQ7	Q9CQQ7	ATP synthase F(0) complex subunit B1, mitochondrial
-0.378711	1.1078	0.195122	-0.823155	-0.37109	-0.840672	-0.533126	-0.668726	1.74666	-0.207953	0.607221	1.05774	-0.795535	-0.098089	-0.426516	-0.322647	-0.433474	0.18406	0.225006	-0.689743	-0.391727	-0.113582	3.38754	1.1586	0.498597	-0.444174	-0.84793	-0.434413	-0.868566	0.534137	-0.151338	-0.861303	79908.1	2	0.737313	0.736395	0.863596	1.00631	-1.19757	0.929224	1.03071	0.825248	-1.03046	0.718115	0.999788	0.0324619	0.1831	P63216	P63216	Guanine nucleotide-binding protein G(I)/G(S)/G(O) subunit gamma-3
-0.280839	-0.0195739	0.0495371	-0.218005	-0.119079	-0.127209	-0.0870583	-0.158731	0.123824	-0.0606578	0.145903	0.0319503	0.157828	-0.124897	-0.0815415	-0.0750001	-0.253139	0.116889	0.149291	0.211338	0.0776714	0.00790235	0.341917	0.122012	-0.133789	0.102468	-0.0967504	0.0156513	-0.211491	0.269022	0.0883095	0.0362458	761373	21	1.41525	1.56188	0.20661	0.478414	-0.117737	1.92614	0.309315	0.0561885	-0.0150318	0.542651	0.0507919	0.0325383	0.0384367	Q61301	Q61301	Catenin alpha-2
-0.320951	-0.0374686	0.0364827	-0.120677	-0.0948905	-0.0171679	-0.0589538	-0.158039	-0.142886	0.00344678	0.00731338	0.0564447	0.0866301	0.0999697	-0.147816	0.00252785	-0.160263	0.150793	-0.0424478	0.130179	0.227089	0.210003	0.10125	0.162852	0.00803811	-0.12841	0.0684796	0.184435	-0.166909	0.0265018	0.0309969	0.00344678	4.13784e+06	16	1.5966	0.979369	0.144307	0.774103	-0.12692	2.01092	0.280459	0.0434243	0.00923252	0.886432	0.0232218	0.0326194	0.0253166	Q9Z1Z2	Q9Z1Z2	Serine-threonine kinase receptor-associated protein
0.687699	-0.182158	-0.107864	-0.289568	0.608247	0.220694	0.591603	0.679897	0.115669	-0.50014	-0.532563	0.0288484	-0.432305	-0.461433	0.466853	0.0800819	0.184329	0.046273	0.014414	-0.672053	-0.179081	-0.0722776	-0.663635	-0.57808	0.347264	-0.313235	-0.541795	0.699663	1.40043	-0.357751	-0.489087	0.20106	2.30705e+06	5	0.900452	1.34035	-0.642934	0.596117	0.491932	1.61645	-0.835921	0.348089	0.298945	0.7678	0.298111	0.0331617	0.125762	P62880	P62880	Guanine nucleotide-binding protein G(I)/G(S)/G(T) subunit beta-2
-0.73594	0.0691831	-0.866318	-0.694539	-0.132026	-0.315179	0.0313178	0.112512	0.576603	-0.578657	0.441775	0.139228	0.24312	1.01582	-0.0289787	0.259621	0.22764	0.432447	-0.769502	-0.359996	0.389762	0.207342	0.530053	0.57436	0.513663	-0.680179	-0.0616473	-0.731321	-0.789949	0.308258	0.542469	0.129057	45027.8	3	0.814707	1.43877	1.09156	0.450313	-0.520752	0.929995	0.882395	0.803276	-0.729916	0.434575	0.833818	0.0332629	0.153212	Q8R373	Q8R373	CXADR-like membrane protein
-0.312868	0.121333	-0.0650677	-0.162925	0.0871829	-0.237768	-0.233868	-0.12739	0.0375614	-0.179988	0.00212865	0.11243	0.370544	0.335521	-0.0929322	-0.00951911	-0.102964	0.21842	-0.185171	0.322077	-0.0755874	-0.030456	-0.0406425	0.454855	-0.0476207	-0.20213	0.168517	-0.135344	0.0205772	0.0537521	0.028274	-0.0909309	389750	8	0.940589	1.34412	0.277891	0.445904	-0.116539	1.13836	0.267553	0.574175	-0.126877	0.36751	0.431251	0.0332768	0.11466	Q9ERG2	Q9ERG2	Striatin-3
-0.199946	0.0768014	-0.155299	-0.268618	0.0100314	-0.050351	-0.146913	-0.101627	-0.0549825	-0.0809401	0.196366	-0.0223967	0.158508	0.13311	-0.0341374	-0.0561013	-0.249489	0.196127	-0.120716	0.189179	0.162422	0.175201	0.112343	0.203954	0.0094721	0.0125865	0.0751242	-0.200266	-0.262548	0.153557	0.087904	0.0516429	1.25204e+06	39	1.05054	1.53253	0.204453	0.499373	-0.125682	1.51771	0.266745	0.2793	-0.0633907	0.597467	0.17884	0.0333133	0.0890148	Q99P72	Q99P72	Reticulon-4
-0.51721	0.231132	-0.344818	-0.420193	-0.537605	0.0980313	-0.293118	-0.193502	-0.00753831	-0.472951	0.688288	0.407831	-0.133094	0.34453	0.196756	-0.0148538	-0.345866	0.157664	-0.47618	0.934472	-0.102239	0.497544	0.501527	0.290031	-0.490569	-0.601818	0.73964	0.135865	-0.488211	-0.516403	0.719205	0.0136536	95416.2	2	0.753331	1.40971	0.588531	0.574523	-0.44137	1.27655	0.616792	0.575502	-0.413109	0.751686	0.66169	0.0334795	0.176469	Q62203	Q62203	Splicing factor 3A subunit 2
-0.0189351	0.0959695	-0.104444	-0.192599	0.0432793	0.0809299	-0.432665	0.0756218	-0.177352	0.429688	-0.0333505	-0.283899	0.40613	0.221652	0.352295	-0.183621	-0.189729	0.0118404	-0.0171572	-0.175861	1.70379	-0.136529	-0.0145811	0.203719	0.0869443	-0.3873	-0.0695438	-0.449146	-0.461364	0.114398	-0.203944	-0.294234	16701.2	2	0.962212	NaN	0	NaN	0	NaN	0	NaN	0	0.326424	0.433487	0.0335021	0.109091	Q9CYK1	Q9CYK1	Tryptophan--tRNA ligase, mitochondrial
0.693553	-0.513489	-0.154447	0.764168	0.729518	0.287261	0.225819	0.131165	-0.283293	0.17022	-0.584625	0.112449	-0.409416	-0.510217	0.117037	-0.12365	1.12477	-0.532664	0.0729968	-0.208976	-0.448837	-0.164417	-0.225155	-0.503855	-0.156924	0.636914	-0.0410454	0.124254	0.191077	0.0179795	-0.0469793	-0.491194	326981	12	0.830775	1.27188	-0.638954	0.507795	0.318932	0.980191	-0.583535	0.742914	0.374351	0.461519	0.629329	0.0335923	0.147647	Q9D8N0	Q9D8N0	Elongation factor 1-gamma
-0.201066	-0.167706	-0.255274	0.0613909	0.807789	1.18151	0.423988	0.78491	-0.519311	0.240349	0.856039	-0.399908	-0.557027	-0.10474	-0.572586	-0.361325	-0.4313	-0.0186661	-0.0148033	-0.586786	0.222192	0.365493	-0.636738	-0.054374	-0.272674	0.426563	-0.189468	-0.44389	0.117091	0.640121	-0.0759724	-0.263815	23295.8	4	0.946641	1.38083	-0.774432	0.390879	0.270247	1.18494	-0.667259	0.569913	0.37742	0.290458	0.540654	0.033753	0.113073	Q9ERL9	Q9ERL9	Guanylate cyclase soluble subunit alpha-3
-0.195104	-0.510819	-0.0895165	0.0375092	-0.559352	-0.397689	-0.0992439	-0.326168	-0.357986	0.423268	0.105178	-0.157515	0.528206	0.167803	0.893076	0.00283367	-0.265018	1.48784	-0.595425	-0.125189	0.20024	0.540177	0.444513	-0.358378	-0.217601	-0.66157	-0.361493	0.37202	0.497313	-0.155052	-0.311542	0.0446837	16932.5	2	0.830315	NaN	0	NaN	0	NaN	0	NaN	0	0.379548	0.903379	0.0339133	0.147804	Q9Z2M6	Q9Z2M6	Ubiquitin-like protein 3
-0.252287	-0.0275093	0.0380819	-0.29527	0.045655	-0.158039	-0.19977	-0.146763	0.143715	0.146765	0.203314	-0.0826967	0.246079	0.0804661	-0.0621034	-0.143167	-0.408585	0.146929	0.0852061	0.0837895	0.316684	0.102965	0.230008	0.139574	0.025661	-0.000706035	-0.112332	-0.106177	-0.396164	0.318754	0.18403	-0.146108	1.8356e+06	12	0.827602	1.819	0.286538	0.441295	-0.163826	1.18638	0.293052	0.554197	-0.157312	0.549172	0.507894	0.0342892	0.14873	P80316	P80316	T-complex protein 1 subunit epsilon
-0.212731	0.191412	-0.260399	-0.62353	0.532092	-0.198337	-0.303608	-0.225878	0.271282	0.103898	0.278059	0.160279	-0.0718175	0.232787	-0.0239968	0.0876184	-0.353824	-0.171	-0.0507227	0.648242	-0.239992	0.400604	0.235869	0.254162	0.480425	-0.217598	-0.0715119	-0.195993	-0.616155	0.163693	0.049148	-0.252476	39250.9	3	0.752595	1.36389	0.483706	0.500278	-0.273839	0.737878	0.374932	1.0299	-0.382613	0.544001	0.982222	0.0348948	0.176769	Q91YN0	Q91YN0	Protein C12orf4 homolog
-0.589282	0.0144204	-0.897988	-0.17868	-0.818053	-0.125031	-0.862936	-0.713964	1.24526	-0.347975	0.219781	0.189315	0.564578	0.319229	-0.422006	0.0143909	-0.262856	-0.832099	-0.406522	0.225257	0.386598	2.05736	0.136867	0.277156	0.00410757	-0.334757	0.528682	0.421644	-0.773946	-0.142448	0.383556	0.720337	65742.9	3	1.86058	2.29865	1.69076	0.0218148	0.0342418	1.39142	1.41401	0.25117	-0.242503	0.0285989	0.128237	0.03496	0.0137854	O70166	O70166	Stathmin-3
-0.157297	-0.109618	-0.102164	-0.320442	0.0469301	-0.0787812	0.0196321	0.0862953	0.139927	0.451201	-0.0439203	-0.0370015	0.259578	-0.0631198	-0.0459583	-0.145123	-0.0377524	0.0820054	0.0742287	0.352734	-0.120666	-0.0909547	0.196239	0.0265506	-0.099	-0.116912	0.22697	-0.260804	-0.0049842	-0.126136	0.108498	-0.110155	186459	15	0.710138	0.926614	0.19797	0.77623	-0.15784	1.10756	0.200319	0.653409	-0.155491	0.80495	0.782681	0.0354161	0.194922	P11881;P70227	P11881	Inositol 1,4,5-trisphosphate receptor type 1
-0.890874	-0.770381	0.393457	-0.841444	-0.81711	-0.731551	-0.846113	-0.797907	0.5253	-0.783813	1.13513	1.50546	4.19379	-0.770835	0.12812	0.574744	-0.240899	1.19084	-0.895036	-0.841974	1.35204	1.03331	-0.785069	-0.815502	-0.796601	-0.49781	-0.328305	-0.728047	-0.747639	0.224853	-0.858492	2.52837	65509	3	1.31794	2.3382	2.3439	0.0444625	-0.107662	0.797272	1.15919	0.906934	-1.29237	0.0536196	0.905342	0.0355419	0.0480902	Q9CZB0	Q9CZB0	Succinate dehydrogenase cytochrome b560 subunit, mitochondrial
-0.060997	-0.168727	0.326112	-0.280152	-0.120666	-0.94237	0.0986368	-0.104482	0.117354	-0.105381	0.474057	-0.149029	0.534135	0.570753	0.0203319	0.00390178	0.141385	0.65478	-0.167829	-0.25488	0.00700832	0.210862	0.449782	0.00463734	0.0203319	-0.553116	-0.187732	-0.043015	-0.551105	-0.103419	0.601078	-0.442247	122343	3	0.73465	0.816315	0.797554	1.11137	-0.503654	0.716256	0.725879	1.36128	-0.57533	0.622164	0.800393	0.0357452	0.184226	Q8R0J7	Q8R0J7	Vacuolar protein sorting-associated protein 37B
-0.233145	0.254752	-0.0519312	0.269509	-0.356575	-0.32285	0.0102216	-0.0676612	0.462911	-0.126928	0.387995	-0.126401	0.293328	0.359805	0.1039	0.0222028	-0.0925486	-0.00303454	-0.0584253	0.0217245	-0.0028434	-0.196963	0.146175	0.0508873	-0.270651	-0.164625	0.0590396	-0.414086	-0.19315	-0.0204245	0.436142	-0.176351	626833	5	1.04378	1.18107	0.336636	0.514327	-0.155992	0.316922	0.102597	1.39274	-0.39003	0.426118	0.209303	0.0360359	0.0904097	Q8K2K6	Q8K2K6	Arf-GAP domain and FG repeat-containing protein 1
-0.394494	0.182819	-0.149525	-0.292759	-0.276646	-0.0586457	-0.32611	-0.227325	0.412928	-0.34097	-0.0123021	0.290138	0.143042	0.0281296	-0.245674	-0.0703279	0.0928518	0.161263	-0.113438	-0.0205644	-0.0733913	0.235674	0.465542	0.494889	-0.284169	-0.375104	0.495316	0.286905	-0.298415	-0.00611939	0.176864	0.0996186	70192.5	5	1.25679	1.16129	0.334821	0.599331	-0.228924	2.47484	0.522219	0.0730208	-0.0415257	0.682267	0.0708673	0.0360548	0.0553619	Q05A62	Q05A62	Dynein light chain 1, axonemal
-0.312357	0.303478	0.0667102	-0.300512	-0.578736	-0.387126	-0.187413	-0.255232	0.307385	-0.0280051	0.21049	-0.0317476	0.135639	0.446395	-0.353977	-0.0642371	-0.328602	0.100394	-0.0341742	-0.00410975	0.234056	0.108619	0.510881	0.255155	0.0336452	0.0363175	-0.00271181	0.0107784	-0.156445	0.083532	0.303849	-0.121939	2.43149e+06	10	1.53942	1.35224	0.477879	0.270397	-0.0882947	1.53547	0.517628	0.12963	-0.0485458	0.141381	0.079116	0.0362715	0.0288787	Q5M8N0	Q5M8N0	CB1 cannabinoid receptor-interacting protein 1
-0.323556	-0.184391	0.248323	-0.815153	-0.413076	0.141425	-0.697071	-0.29034	0.160389	0.492597	-0.257653	-0.239715	-0.106181	0.0692047	0.368866	-0.305058	-0.029169	-0.361035	0.700949	-0.121583	0.25478	0.0056343	0.82557	0.749802	-0.0566753	0.666566	0.0917162	-0.0295886	-0.546891	0.275688	-0.0167694	-0.257606	64275.8	5	1.42309	1.13119	0.699879	0.533728	-0.301307	1.59606	0.958847	0.0626397	-0.0423393	0.388711	0.0537788	0.0362735	0.037749	Q14BI1	Q14BI1
0.403186	-0.145406	-0.320238	3.17238	-0.0413541	-0.203364	-0.100676	-0.227387	-0.24242	0.0644661	-0.627603	-0.528415	-0.592452	-0.209185	-0.399935	-0.41762	0.674443	-0.0929746	0.653994	0.0500219	-0.599969	0.0454163	-0.687481	-0.0658193	-0.108782	0.451602	0.0386369	0.114686	0.36402	-0.455203	-0.02728	0.0607082	271404	7	1.06904	1.53598	-0.85275	0.286462	0.229285	0.316792	-0.310808	2.22428	0.771228	0.215537	0.357389	0.03629	0.0853026	P62881	P62881	Guanine nucleotide-binding protein subunit beta-5
-0.454692	0.236862	-0.389549	-0.443281	-0.0305216	-0.432811	0.450503	0.119741	-0.179913	0.07209	0.154448	-0.130812	0.524502	0.13309	-0.133367	0.0427234	0.0530541	0.122003	0.432105	-0.0729477	-0.0345264	0.129723	-0.00359196	0.228156	-0.0832794	0.0615852	-0.289549	-0.0933197	-0.0172309	0.294669	-0.0515313	-0.21433	172299	4	0.876878	0.795071	0.343747	1.13002	-0.227084	1.11282	0.4193	0.532078	-0.151531	0.657075	0.311843	0.036566	0.132777	Q61036	Q61036	Serine/threonine-protein kinase PAK 3
0.273348	0.130417	0.224432	0.3486	-0.303123	-0.0965496	-0.137195	-0.178267	-0.188167	0.209404	-0.297828	-0.142726	-0.34526	0.208146	-0.593049	-0.343577	-0.0719775	-0.481111	-0.318625	0.163512	0.188678	-0.304737	0.428845	0.354464	0.0473936	0.29682	0.0989126	0.0150822	-0.115566	0.619037	0.0876825	0.222984	42120.7	3	1.06428	0.999322	-0.385839	0.689851	0.280098	0.177445	-0.0996376	1.82618	0.566299	0.730375	0.13571	0.0368402	0.0862424	P62069	P62069	Ubiquitin carboxyl-terminal hydrolase 46
-0.695034	-0.0150519	0.801682	0.865918	-0.49939	0.284652	-0.279816	0.0435504	-0.446552	0.148395	-0.27321	-0.403282	-0.203308	-0.464639	-0.111788	-0.473758	1.33578	-0.411622	-0.482684	-0.268127	-0.39685	-0.394389	-0.113472	-0.103295	-0.104644	1.00542	1.40054	0.244236	-0.140444	-0.0539637	0.265111	-0.0599544	18416.1	3	0.979401	0.554814	-0.393853	1.20214	0.637657	0.216588	-0.211456	2.32312	0.820054	0.608639	0.206694	0.0369428	0.104857	Q8K207	Q8K207	Uncharacterized protein C1orf21 homolog
-0.189853	-0.47862	-0.282307	0.693664	-0.275665	-0.114499	-0.237925	-0.253673	0.0709107	-0.00800839	0.421531	-0.326748	0.142835	1.37558	-0.0911109	-0.0333047	0.0716592	-0.128863	0.403151	-0.261006	0.283003	-0.0110608	-0.376528	0.669699	-0.30907	0.211266	0.0792097	-0.591203	-0.303238	0.132231	0.146945	-0.428998	15504.1	2	0.705383	NaN	0	NaN	0	NaN	0	NaN	0	0.748997	0.762495	0.036979	0.197068	Q9D2R0	Q9D2R0	Acetoacetyl-CoA synthetase
0.767955	-0.193942	0.230333	0.101573	0.0248934	0.289525	0.139336	-0.0352583	-0.119241	0.3393	-0.409384	-0.253478	-0.362099	-0.280191	-0.0252647	-0.0316074	0.233504	-0.0613668	0.229084	-0.216859	0.000199054	-0.0266104	-0.14557	-0.26968	-0.209988	0.330364	-0.202128	0.0110571	0.247534	0.0469937	-0.248251	0.0992674	1.04069e+06	20	1.13493	1.61482	-0.454711	0.143995	0.0543404	0.935829	-0.25638	0.765526	0.252672	0.0963643	0.987399	0.0372075	0.0732936	Q9QYC0	Q9QYC0	Alpha-adducin
-0.266716	0.0179638	-0.0455212	-0.168136	0.448203	-0.050209	-0.198053	-0.296738	0.348166	0.0582205	-0.0253659	0.120861	0.174146	-0.224194	-0.0528247	-0.0635515	-0.0350396	-0.00593168	0.358717	0.0818687	-0.203425	0.0237213	0.636058	0.175937	-0.401743	0.39729	0.0580624	-0.178705	-0.430905	0.199093	-0.085901	-0.365349	569588	5	0.759357	0.636308	0.181692	1.02426	-0.367933	0.984011	0.283309	0.730681	-0.266315	0.464817	0.946567	0.0372537	0.174037	Q9DCP2	Q9DCP2	Sodium-coupled neutral amino acid transporter 3
-0.846525	0.274543	-0.77906	-0.881748	0.52132	1.17208	-0.869401	-0.823117	-0.587026	0.860366	0.49333	0.194581	0.724998	-0.248742	0.336529	0.425064	-0.677973	0.550891	-0.795576	-0.0206901	0.944733	0.38842	0.296409	0.0609895	0.0676662	-0.688659	0.69199	-0.875125	-0.711037	0.42131	0.174947	0.204517	50624.4	2	0.983207	1.51831	1.63525	0.26607	-0.398155	0.916193	1.23682	0.768131	-0.796589	0.194515	0.639877	0.0374357	0.103942	Q00915	Q00915	Retinol-binding protein 1
-0.583579	0.00319273	0.482786	-0.640895	0.466345	1.34591	0.775816	0.525756	0.280098	1.02845	-0.475823	-0.401279	-0.804098	-0.294012	-0.770226	-0.508154	-0.707638	0.619901	0.17957	-0.152212	-0.683507	0.629143	-0.617686	-0.582813	0.0571341	0.462133	-0.587161	0.194109	0.462699	-0.34051	-0.196537	0.833088	31812.4	3	0.703793	0.975265	-0.918334	0.692131	0.599591	0.739107	-0.716769	0.951119	0.801157	0.650357	0.904316	0.0376627	0.197791	Q3TFQ1	Q3TFQ1	SPRY domain-containing protein 7
-0.0475207	-0.216363	-0.130582	-0.181133	-0.323055	-0.260854	0.137538	-0.330576	-0.414428	-0.1554	-0.435027	-0.0976532	-0.0452191	0.927744	-0.534033	-0.362417	-0.327851	-0.318041	-0.536729	0.00329918	-0.180282	-0.157225	-0.141571	0.406113	0.862656	-0.486262	0.987249	1.04343	0.302949	0.315019	0.659363	0.0368668	15804.3	2	1.80153	0.107546	-0.0692981	1.69961	0.751345	NaN	0	1.55071	0.797069	0.080535	0.0491811	0.0376889	0.0157931	Q9CY57	Q9CY57	Chromatin target of PRMT1 protein
-0.44907	-0.395445	-0.62116	0.542128	-0.371565	-0.279475	-0.461151	1.07399	-0.488145	-0.662352	0.40976	0.840885	-0.0308098	0.00932522	0.747668	0.406237	0.183764	1.11349	-0.378903	0.703841	0.0654583	0.0775689	0.136071	-0.219843	-0.214702	-0.381579	-0.412003	-0.302622	0.280319	-0.489997	-0.380214	-0.0514641	19219.9	2	0.704583	NaN	0	NaN	0	NaN	0	NaN	0	0.67215	0.810217	0.0378875	0.197432	Q00896;P07758;Q00897	Q00896;P07758;Q00897	Alpha-1-antitrypsin 1-3;Alpha-1-antitrypsin 1-1;Alpha-1-antitrypsin 1-4
0.465961	-0.191592	0.159359	0.051323	0.603801	0.270267	0.348811	0.260886	-0.204871	-0.27521	-0.224308	-0.134255	-0.128554	-0.121073	0.375631	0.165324	0.626534	0.0699909	-0.344311	-0.46797	-0.20125	0.0409074	-0.413507	-0.394034	0.17633	0.194046	-0.456567	0.0828012	0.146079	-0.197257	-0.25433	-0.0289624	831400	13	1.37106	1.79295	-0.424587	0.378552	0.202225	1.74436	-0.600259	0.0529304	0.0265536	0.446374	0.056121	0.038053	0.0425536	Q03137;P29319	Q03137	Ephrin type-A receptor 4
-0.291902	0.281474	-0.000358949	-0.263314	-0.00158332	-0.332559	-0.146016	0.0893052	-0.234863	-0.0987797	0.0698844	0.43412	0.791188	0.0468787	-0.0174202	0.270993	-0.181501	0.373407	-0.183225	-0.193798	0.506315	-0.18504	0.0212414	0.459259	0.289325	-0.145336	-0.288725	-0.655303	-0.20496	0.0747854	0.358751	-0.642239	220379	6	0.827286	1.01195	0.322554	0.784329	-0.449125	0.564093	0.213609	1.06337	-0.558069	0.724708	0.341275	0.0387429	0.148838	Q9JIX8	Q9JIX8	Apoptotic chromatin condensation inducer in the nucleus
-0.243193	-0.397197	-0.482755	-0.327904	-0.152118	0.25123	-0.51758	-0.692688	-0.386099	-0.114813	-0.198412	-0.587967	0.0959509	0.135299	0.69144	0.355044	-0.287284	0.00840395	0.304168	0.972398	0.465834	-0.0347939	0.484968	0.31719	-0.399535	0.19854	0.0420542	0.0748303	-0.0206578	0.121549	0.632368	-0.308274	15621.3	2	1.89084	NaN	0	NaN	0	NaN	0	NaN	0	0.52296	0.00933672	0.0388039	0.0128577	Q9CSH3	Q9CSH3	Exosome complex exonuclease RRP44
0.249395	-0.42128	0.0446274	1.55664	0.821853	-0.436945	0.66118	0.230815	-0.324608	0.612086	-0.305387	-0.578561	-0.713749	-0.758232	0.581291	0.0441662	0.459833	-0.0638269	0.971665	-0.757458	-0.252201	-0.737553	-0.57441	-0.678699	0.0958046	1.15644	0.32332	0.170726	-0.177964	-0.0863509	-0.473588	-0.639021	67217.3	6	0.762912	1.06978	-0.849634	0.62488	0.612089	1.18966	-0.981406	0.495432	0.480317	0.727656	0.464261	0.0391036	0.172619	P97390	P97390	Vacuolar protein sorting-associated protein 45
1.70888	0.299453	1.09653	0.682021	0.336412	-0.595938	1.31711	0.376022	-0.072865	0.263469	-0.8846	0.149242	-0.513148	-0.0202154	-0.895136	-0.109267	-0.95715	-0.915861	0.347292	0.328532	-0.891426	-0.156688	0.118837	0.476511	-0.252574	-0.194066	0.398199	-0.412945	0.201335	-0.835575	-0.128724	-0.263662	143399	4	1.02218	1.5226	-1.44903	0.422139	0.750539	1.36086	-1.80229	0.27569	0.397284	0.499158	0.179339	0.0398101	0.0950221	P39054	P39054	Dynamin-2
0.218136	-0.00445516	0.305264	0.39781	0.609726	0.248843	0.947162	0.379838	-0.753083	0.911279	-0.749603	0.0297695	-0.742522	-0.737566	0.151688	0.112692	0.354387	-0.441336	0.542733	-0.279738	-0.0695687	-0.186414	-0.716496	-0.528109	-0.123665	0.41099	-0.825455	1.11008	0.164828	-0.488052	-0.253657	0.00450004	49467.4	3	1.13502	1.82271	-1.26843	0.126594	0.157216	1.98339	-0.891618	0.419958	0.534026	0.10437	0.593357	0.040037	0.0732787	Q922H4	Q922H4	Mannose-1-phosphate guanyltransferase alpha
-0.342121	0.526469	0.146036	-0.525273	-0.312023	-0.702189	-0.0863606	-0.111563	0.799179	0.194422	0.577754	-0.232538	0.214827	0.188307	-0.142501	-0.0657952	-0.15967	0.256718	-0.113302	-0.35763	0.634914	-0.197882	0.0197655	0.470968	0.232296	-0.020907	-0.5434	-0.235656	-0.780494	0.302926	0.969399	-0.604677	5.00351e+06	5	0.682318	1.2628	0.631189	0.553163	-0.457209	0.806309	0.462866	0.851441	-0.625532	0.733493	0.750194	0.0402192	0.207817	P62897	P62897	Cytochrome c, somatic
-0.639951	-0.775523	-0.515062	-0.760219	0.934133	1.92843	0.603147	-0.58024	-0.620402	-0.709219	-0.750833	-0.518958	-0.79173	-0.278412	-0.670459	-0.651857	2.26962	-0.809635	-0.829725	-0.501267	0.514715	-0.746457	-0.692641	-0.649167	-0.2729	0.687055	-0.336128	6.99291	-0.500491	-0.432711	-0.722308	0.826287	46454.9	2	0.833028	0.927418	-0.911862	0.770932	1.0924	0.296137	-0.50406	1.70746	1.5002	0.847808	0.294297	0.0403026	0.146883	Q9CPS8	Q9CPS8	Small membrane A-kinase anchor protein
-0.263324	0.374242	-0.472289	-0.312634	-0.517456	-0.267434	-0.535224	-0.352723	0.476349	-0.302276	0.21367	0.461038	0.425255	0.434671	-0.385051	-0.274485	-0.266796	0.08716	-0.494905	0.596063	-0.078489	0.199094	0.561999	0.535878	0.204007	-0.283017	0.223659	0.102144	-0.498647	-0.142686	0.445233	0.106975	1.22126e+06	10	1.28338	1.65764	0.676894	0.20331	-0.136173	1.58718	0.680867	0.20552	-0.1322	0.164971	0.159061	0.0408606	0.0520743	P09528	P09528	Ferritin heavy chain;Ferritin heavy chain, N-terminally processed
-0.270667	0.131102	0.0665551	-0.305907	0.477883	-0.167204	-0.319181	-0.228785	-0.0809375	-0.0774887	0.244724	0.120065	0.13258	0.396681	0.157217	-0.149101	-0.282906	0.539078	-0.160178	0.6392	-0.319536	0.0914871	0.132088	0.309369	-0.526096	-0.432882	0.287197	-0.386192	-0.467738	0.0421154	0.208459	0.199	101476	7	0.711103	0.928298	0.277745	0.803503	-0.411623	0.584052	0.260442	1.06066	-0.428926	0.680695	0.60486	0.0410978	0.19449	Q8BWG8	Q8BWG8	Beta-arrestin-1
0.262674	0.268585	-0.76593	-0.15734	-0.272591	-0.181368	-0.4991	-0.477857	-0.583403	0.281666	-0.174104	-0.198752	0.299532	0.139806	0.0770512	-0.185774	0.711722	0.376572	0.0268612	0.432373	-0.155378	0.664252	0.0441763	0.348792	-0.57287	0.357157	0.221252	-0.143674	-0.220542	0.189514	0.177844	-0.291145	29049.7	4	1.3684	0.589546	0.402686	1.23303	-0.483739	1.90659	0.890436	0.00501364	0.00401127	0.846202	0.0394485	0.041118	0.0428152	Q9DBR2	Q9DBR2	Protein FAM13C
1.24303	-0.351173	-0.117295	-0.242929	0.87074	0.253587	-0.200832	0.208928	-0.305634	-0.0874314	-0.115966	-0.138736	-0.227365	-0.475318	-0.0801777	-0.0139181	0.390863	0.0195478	-0.31412	-0.0662632	-0.250631	-0.486975	-0.432437	-0.794169	0.0850867	-0.0223408	-0.692016	1.15785	1.46448	-0.0871111	-0.0538691	-0.137406	62451.2	4	0.738401	1.0438	-0.454347	0.75454	0.623517	1.13609	-0.719447	0.508205	0.358418	0.739516	0.479518	0.0412426	0.182641	Q8BMS4	Q8BMS4	Ubiquinone biosynthesis O-methyltransferase, mitochondrial
0.677807	-0.254957	-0.0818697	0.308022	0.339996	-0.00285764	0.24426	0.0302227	-0.170289	-0.234974	-0.263381	-0.354689	-0.0398125	-0.214375	0.0908486	-0.108924	1.20574	-0.0902937	-0.327451	-0.349585	-0.0651443	-0.0371061	-0.388544	-0.323392	-0.143172	0.32032	-0.0760895	0.132292	0.757003	-0.288221	-0.0264072	-0.264979	162635	17	0.742332	1.89742	-0.442348	0.361465	0.212006	0.799789	-0.371952	0.87892	0.282401	0.457706	0.771859	0.0412748	0.180995	Q4ACU6	Q4ACU6	SH3 and multiple ankyrin repeat domains protein 3
-0.0148981	0.213771	0.0162929	0.457843	0.0644511	-0.300191	-0.158346	0.137052	-0.157125	-0.470138	0.143038	-0.0198931	-0.459614	0.137852	-0.1299	0.00946755	-0.112894	-0.0177579	-0.223548	0.56705	-0.432198	-0.242652	0.128739	-0.265377	0.14727	0.0591127	-0.0232485	-0.273804	0.837662	0.178767	0.118787	0.0844312	262257	7	0.695651	0.765164	-0.278069	0.86303	0.322869	0.548479	-0.217514	1.09721	0.383424	0.87464	0.560162	0.0415886	0.201534	Q8CH72	Q8CH72	E3 ubiquitin-protein ligase TRIM32
-0.158461	0.687468	0.02334	0.308645	-0.982979	-0.986599	0.052933	0.0425263	0.609097	-0.124834	0.366766	0.310059	0.0829494	0.733555	0.184682	0.0735339	-0.426916	0.364359	-0.278034	-0.751687	0.0231993	0.00486273	-0.0631711	0.606973	0.0515169	0.081746	-0.98192	0.147444	-0.97731	0.0202964	1.94224	-0.986279	1.41253e+06	3	0.72164	0.917833	1.70326	0.732941	-1.65802	0.496912	1.10398	1.14672	-2.25731	0.977274	0.469795	0.0416009	0.189828	Q8BK30	Q8BK30	NADH dehydrogenase [ubiquinone] flavoprotein 3, mitochondrial
-0.649016	0.400645	-0.112752	-0.542087	-0.562512	0.156217	-0.521603	-0.358677	0.291725	-0.514414	0.290681	0.447678	0.771403	0.508383	-0.500351	0.175932	-0.358185	-0.073498	-0.508643	0.397808	0.335097	0.454237	0.460323	0.399089	-0.326041	-0.465056	0.579287	-0.636096	-0.331615	-0.207195	0.74505	0.254185	50771.6	7	0.805574	1.21429	0.736426	0.459103	-0.344148	1.28267	0.713479	0.458231	-0.367094	0.444702	0.499264	0.0416101	0.156468	O88271	O88271	Craniofacial development protein 1
-0.107829	0.306595	-0.334781	-0.690095	-0.443768	-0.397759	-0.418294	-0.212649	0.595967	-0.425382	0.300022	-0.00163562	0.554295	0.702333	-0.272534	-0.104651	-0.260204	0.240223	-0.537805	0.532688	0.0706646	0.162382	-0.0204082	0.803414	0.154822	-0.524746	0.43401	-0.175446	-0.19495	-0.226954	0.571351	-0.0788759	2.32781e+06	7	1.09452	1.56094	0.724739	0.228829	-0.161197	1.32051	0.659549	0.359882	-0.226387	0.185545	0.305764	0.0417664	0.0804415	P21107	P21107	Tropomyosin alpha-3 chain
-0.0872971	-0.593651	-0.40111	0.0632737	-0.412579	-0.393573	-0.523662	0.0539304	0.536728	-0.0501708	-0.620561	0.471189	-0.0591992	0.306687	0.604692	-0.310799	-0.0110997	0.869589	0.407247	0.34369	0.214268	-0.322811	-0.246129	0.220711	0.339366	0.481857	-0.0332968	-0.485196	-0.138935	0.151251	-0.269199	-0.10521	15535.9	3	1.16085	NaN	0	NaN	0	NaN	0	NaN	0	0.407623	0.113732	0.0419658	0.0690474	P61290	P61290	Proteasome activator complex subunit 3
0.022613	0.152796	0.029198	-0.233487	0.393187	-0.238159	-0.227122	-0.09208	-0.178524	-0.0674671	0.00781435	0.128088	0.232246	0.19967	0.317593	-0.00842727	-0.170121	0.174995	0.0725912	0.363778	-0.181972	0.090588	-0.069317	0.219046	0.138842	-0.250982	0.0465677	-0.187648	-0.392201	0.0427737	0.0172517	-0.352131	318938	7	0.802858	0.575752	0.160006	1.04583	-0.281594	0.421116	0.132447	1.26509	-0.309153	0.562081	0.401053	0.0420077	0.15745	P32233	P32233	Developmentally-regulated GTP-binding protein 1
0.07595	-0.0198332	0.418171	1.25837	0.238449	-0.402547	0.663451	-0.112146	-0.322325	0.482708	-0.265046	-0.40403	-0.120451	-0.118544	-0.116775	-0.164496	0.481822	-0.115209	0.653375	-0.261709	-0.335982	-0.471848	-0.418885	-0.424998	-0.210925	0.279226	-0.141895	-0.0188803	0.0754054	0.0850725	-0.13073	-0.134747	146893	9	0.859368	1.13885	-0.484216	0.504364	0.248958	1.00036	-0.53734	0.614702	0.195834	0.500524	0.330293	0.0423645	0.138239	Q9DAR7	Q9DAR7	m7GpppX diphosphatase
-0.136564	-0.149091	-0.115209	-0.283849	-0.0180661	0.019025	-0.0936446	-0.118454	0.0809266	0.0174203	0.0861955	-0.0809787	0.0525932	0.0256559	0.216905	-0.0543899	-0.0842244	0.0534648	-0.0122735	0.0450915	0.0901028	0.238261	0.184246	-0.170724	-0.199581	-0.0393165	0.113901	0.10612	-0.118977	-0.0384436	0.131836	0.252043	2.86587e+06	24	1.46087	2.32255	0.234193	0.100222	-0.02687	1.731	0.228321	0.145753	-0.0327418	0.102354	0.122343	0.0423998	0.0346043	O08539	O08539	Myc box-dependent-interacting protein 1
0.119806	-0.443958	-0.351416	-0.443079	-0.37799	-0.401622	-0.363249	0.205929	-0.636121	-0.263601	0.136568	0.332148	-0.196998	0.204004	-0.34388	0.428326	-0.274659	1.09134	0.695698	0.28829	0.431274	0.483937	-0.278797	0.361686	0.0932936	-0.415988	-0.226227	0.910084	-0.405137	-0.333541	-0.37573	0.349614	16056.5	2	1.29919	0.545603	0.314462	1.08771	-0.55684	2.3413	0.843573	0.0300398	-0.0277288	0.559093	0.056418	0.0425073	0.0502126	Q8K0C4	Q8K0C4	Lanosterol 14-alpha demethylase
-0.21239	0.169605	-0.0112367	0.522827	0.374624	-0.63471	0.621256	0.209457	-0.493543	0.103298	-0.469047	-0.0336964	-0.11649	-0.200312	-0.471348	-0.164249	-0.570142	-0.0882363	0.074738	-0.205745	0.72003	-0.312528	-0.169229	-0.400505	-0.354893	0.608458	-0.180099	0.250348	1.18886	-0.3896	0.768901	-0.134402	23285.6	3	0.674529	0.94459	-0.491468	0.694817	0.433162	0.525199	-0.349147	1.16507	0.575483	0.894396	0.607154	0.0426117	0.211578	P60755	P60755	MAM domain-containing glycosylphosphatidylinositol anchor protein 2
-0.0519846	-0.123856	0.261147	1.72995	0.0136764	0.342974	0.0104905	0.0653411	-0.127918	0.608164	-0.152884	-0.0267597	-0.677023	-0.839855	-0.858965	0.329535	0.528628	-0.00374427	0.140001	-0.900888	-0.130645	0.0629522	-0.080126	-0.842851	-0.156995	0.976784	-0.0519245	0.451977	0.179421	-0.255685	-0.733237	0.314305	100456	3	0.687088	1.23463	-1.06822	0.491049	0.617623	0.959397	-0.938795	0.669719	0.747051	0.575216	0.811091	0.0428714	0.205547	Q9DCB4	Q9DCB4	cAMP-regulated phosphoprotein 21
-0.188403	0.0937093	0.0601044	-0.239325	0.0989533	-0.175629	-0.139187	-0.140052	-0.167787	0.0105049	0.0633033	0.0455991	0.226754	0.127193	0.0980862	-0.109431	-0.274132	0.0645312	-0.0325533	0.225696	0.00795513	0.202747	0.499916	0.24263	-0.192107	-0.114796	0.170202	-0.560044	-0.280651	0.261826	-0.00782583	0.122213	415723	26	0.685025	0.99891	0.174643	0.809211	-0.309512	1.16013	0.263586	0.59557	-0.22057	0.56001	0.852128	0.0432299	0.206526	P70336	P70336	Rho-associated protein kinase 2
-0.197094	0.0548133	-0.413082	0.132655	0.100433	-0.314612	-0.302428	0.826771	-0.213681	0.3348	-0.219287	0.428093	0.13009	-0.484412	-0.151358	-0.320738	-0.511747	0.0155989	-0.518453	-0.428476	0.0515141	-0.558536	-0.547116	0.97613	0.0295457	-0.251678	0.453759	0.437566	0.0526888	0.357767	0.102931	0.947542	16559.9	2	1.15122	NaN	0	NaN	0	NaN	0	NaN	0	0.0774136	0.903813	0.0433816	0.0705961	Q6P549	Q6P549	Phosphatidylinositol 3,4,5-trisphosphate 5-phosphatase 2
-0.289576	-0.081247	-0.264302	-0.40824	-0.223573	0.0892228	-0.197847	-0.0818505	-0.114172	-0.0818008	-0.0704219	0.0611811	0.414706	0.283758	-0.327939	0.0423017	-0.254485	0.0589653	-0.137835	0.230996	0.348804	0.346337	0.0474862	0.368943	-0.103297	-0.00824567	0.179996	-0.156312	0.0983358	0.00242791	0.0817717	0.145911	1.98628e+06	10	1.68104	1.25131	0.315983	0.370492	-0.106564	2.04141	0.452975	0.0854754	0.0304275	0.303478	0.022275	0.0434505	0.0208429	P97315	P97315	Cysteine and glycine-rich protein 1
-0.355438	-0.578255	0.652053	-0.216712	-0.0639624	-0.630625	-0.285387	-0.686813	0.353101	2.28395	0.150401	-0.0876335	0.0143326	-0.365174	-0.0853654	-0.303396	-0.35139	-0.600292	-0.507545	-0.234456	2.87963	0.2655	0.473521	0.0631812	-0.446596	0.226296	-0.150108	0.506325	-0.549589	-0.708584	-0.0955653	-0.565414	26247.3	2	0.653916	1.19458	0.766917	0.53001	-0.508497	0.666779	0.598439	0.98465	-0.676975	0.671639	0.897343	0.0435218	0.221862	Q9DCI9	Q9DCI9	39S ribosomal protein L32, mitochondrial
-0.498694	-0.0484082	0.313679	-0.0340661	-0.261128	-0.32789	-0.0448286	-0.242737	0.0951856	0.645072	-0.0613394	-0.197737	-0.163945	-0.0802937	0.151772	-0.362048	0.455929	-0.0505897	0.384347	0.140329	-0.0334785	-0.193596	0.590995	0.361488	-0.0541953	0.300735	-0.0483554	-0.445242	-0.336302	0.472649	0.0189544	-0.446261	765559	8	0.918902	0.536091	0.227223	1.07752	-0.420314	1.71211	0.510326	0.24205	-0.137212	0.533516	0.233305	0.0435325	0.120531	Q8BH44	Q8BH44	Coronin-2B
-0.314286	-0.0602219	0.0195985	0.296791	-0.154023	0.141269	-0.190577	0.0079675	0.00676088	-0.0241879	-0.00554568	0.112137	-0.000206697	-0.0999	-0.252353	-0.226134	0.070687	-0.267551	-0.237145	0.0616364	-0.527209	0.0914664	0.450874	-0.636296	0.00895412	0.0912124	0.510467	0.705646	0.216372	-0.0132555	0.0878562	0.129196	90276.7	5	1.20861	0.0925448	-0.0308267	1.36741	0.574477	0.441854	-0.244544	1.98391	0.360759	0.0681111	0.688094	0.0436688	0.0618571	Q3TC33	Q3TC33	Coiled-coil domain-containing protein 127
-0.602157	0.762636	-0.807013	-0.696006	0.106414	-0.125256	-0.831679	0.174739	0.336366	-0.638009	0.221963	0.296851	0.19758	0.291257	0.364714	0.28564	-0.139221	-0.283602	0.132193	0.434845	0.027913	0.0765023	-0.081777	0.603058	0.425373	-0.778769	0.149761	0.0239701	-0.602346	0.223637	0.354714	0.0957093	45400.7	2	0.943602	1.16211	1.00567	0.404995	-0.325661	1.20424	0.961903	0.411966	-0.369431	0.289832	0.355245	0.0437092	0.113867	Q8K0F1	Q8K0F1	TBC1 domain family member 23
-0.258919	0.55287	-0.195821	-0.359794	-0.139254	-0.912598	-0.212892	-0.0526207	0.210579	0.351622	1.13812	0.198862	-0.144878	0.189973	0.205832	-0.146561	-0.147437	0.360579	0.336943	0.307582	0.088894	-0.497809	0.264922	-0.201645	0.240679	-0.00110614	-0.93035	-0.0218472	-0.429761	0.214248	0.952536	-0.960952	296998	2	0.694421	1.1194	0.880746	0.672566	-0.996609	0.700255	0.634288	0.912224	-1.24307	0.897433	0.499924	0.0441376	0.202106	Q8BM72	Q8BM72	Heat shock 70 kDa protein 13
-0.184608	0.258435	-0.428993	-0.608913	-0.606644	-0.72595	-0.536196	-0.406332	0.765064	-0.32955	0.403395	0.148012	0.388087	0.622691	-0.225761	-0.216331	-0.587272	-0.389336	-0.23345	0.873446	-0.199212	-0.420672	-0.229984	3.11813	0.29614	-0.459027	0.135082	-0.24223	-0.361431	-0.109252	0.884002	-0.391342	568365	6	1.28735	2.43596	1.0727	0.0445622	-0.0545964	0.989818	0.786336	0.586645	-0.340956	0.0674442	0.412312	0.0442518	0.0515995	P19157;P46425	P19157;P46425	Glutathione S-transferase P 1;Glutathione S-transferase P 2
-0.385331	-0.618804	-0.297559	-0.565193	0.0700324	0.159841	-0.421961	-0.576675	0.711563	-0.255815	-0.0384162	0.300152	0.527175	0.0794293	-0.37069	-0.322085	-0.550863	0.305662	0.459303	2.40495	-0.421418	0.457783	-0.46531	0.441537	-0.260271	-0.0874	0.440954	-0.661964	-0.212069	0.619427	-0.0510096	-0.414978	19403.8	2	0.841421	1.57562	0.710916	0.403188	-0.377953	1.16315	0.805704	0.411062	-0.283165	0.525312	0.321402	0.0445324	0.144072	Q9QYP6	Q9QYP6	5-azacytidine-induced protein 2
-0.260619	-0.0859745	-0.140104	-0.284651	0.0670221	-0.0128125	-0.228898	-0.175758	-0.0592019	0.0106356	-0.0619169	0.199008	0.268516	0.164445	-0.110742	-0.250493	-0.260162	0.116711	0.00317422	0.234839	0.0942528	0.117853	0.11265	0.392532	-0.0869395	-0.00953906	0.271713	0.114655	-0.159264	0.084838	-0.12541	0.0596375	394059	7	1.43954	1.25304	0.239944	0.414221	-0.105005	1.99644	0.350131	0.0156896	0.0051825	0.418196	0.0391774	0.0448143	0.0363466	Q9QZB7	Q9QZB7	Actin-related protein 10
-0.750579	-0.156143	-0.764604	0.650046	-0.135116	0.0483381	-0.502851	-0.0451784	-0.296504	-0.636017	1.01941	0.493178	0.764666	0.0623047	-0.0801338	0.227848	-0.195947	-0.365472	0.210245	-0.488775	0.0709808	0.849947	1.38532	0.0528975	0.0338326	-0.11734	-0.577976	-0.202526	-0.650275	0.0795807	-0.751024	0.767858	51980.4	2	0.615218	0.82384	0.692246	0.767381	-0.617966	0.841671	0.685035	0.750547	-0.625177	0.90615	0.924308	0.0450104	0.242539	Q8CFE6	Q8CFE6	Sodium-coupled neutral amino acid transporter 2
-0.278073	0.229827	-0.146787	-0.289769	0.188741	-0.328917	-0.300422	-0.220873	-0.0475754	-0.192976	0.238062	-0.138611	0.183907	0.616765	-0.129272	-0.0964797	-0.112802	0.0195901	-0.00413164	0.281327	-0.0619575	-0.21419	0.442183	0.692791	0.271899	-0.135418	0.0137713	-0.156901	-0.388921	0.0781611	0.221651	-0.234599	335145	6	0.787095	0.978732	0.299946	0.63503	-0.230366	1.31848	0.393802	0.346759	-0.13651	0.785148	0.317485	0.0450693	0.163269	Q3TMH2	Q3TMH2	Secernin-3
0.290178	-0.416183	-0.20209	0.185754	-0.414103	1.24698	-0.468497	0.0491409	-0.62983	-0.736846	0.0485072	-0.147483	-0.514376	-0.441764	-0.343559	-0.043011	-0.650737	0.633881	0.102446	-0.232817	0.108218	-0.521419	-0.128795	0.403247	0.248177	-0.411142	1.06543	1.60783	0.479981	-0.485436	0.150346	0.167975	18569.8	2	1.10658	1.04634	-0.642597	0.58947	0.461777	0.0939037	-0.092669	1.75921	1.01171	0.733889	0.0919205	0.0451365	0.0782392	O08691	O08691	Arginase-2, mitochondrial
-0.0420048	0.619733	-0.349491	-0.987197	-0.988632	-0.479553	-0.430441	-0.347879	0.624621	-0.569104	0.825033	0.134559	1.0407	1.00246	-0.347205	-0.0274723	-0.434636	0.160453	-0.321484	0.53492	-0.0391648	0.273605	-0.246049	0.305246	0.193481	-0.689324	0.561076	-0.635436	-0.0652566	-0.0677669	0.870016	-0.0778064	1.51389e+06	3	1.34307	1.22498	2.12684	0.185796	-0.171958	1.05277	1.85281	0.488677	-0.445985	0.087079	0.212417	0.0462939	0.045387	P11031	P11031	Activated RNA polymerase II transcriptional coactivator p15
-0.687342	-0.689609	0.180142	-0.0182084	0.638229	0.452059	-0.706516	0.0617667	-0.245711	-0.239956	0.334573	1.50278	0.51163	0.191065	-0.0901908	1.52508	-0.35978	0.398901	-0.134518	0.723324	-0.0909554	-0.404065	-0.481475	-0.244658	-0.36101	-0.319707	-0.0314852	-0.760707	-0.287382	0.140623	-0.224301	-0.282603	16557.8	2	0.986741	NaN	0	NaN	0	NaN	0	NaN	0	0.380865	0.209424	0.0463984	0.1031	Q8BZM1	Q8BZM1	Glomulin
-0.30568	-0.088707	0.0399704	-0.348111	0.0989637	-0.178803	-0.0779612	-0.160746	-0.114936	0.118655	-0.0476608	0.0804615	0.429769	0.0582226	0.0283653	-0.0106588	-0.288869	0.190251	0.0326856	0.319038	-0.0388255	-0.146897	0.0653129	0.450542	-0.0865466	0.165629	0.183438	-0.352016	-0.0925014	0.144717	0.0975785	-0.164679	361058	53	0.838991	1.62613	0.298526	0.311888	-0.113707	1.11076	0.285743	0.46159	-0.12649	0.359019	0.42842	0.0467911	0.14488	Q6ZWR6	Q6ZWR6	Nesprin-1
-0.0347457	-0.255257	0.376859	-0.239651	0.651816	-0.0367561	1.11157	0.704818	-0.34983	0.530403	-0.272053	-0.652318	-0.393282	-0.535251	0.374127	0.810932	0.173811	-0.721961	0.465815	-0.808323	-0.858293	-0.200178	-0.33417	-0.490604	-0.0745138	0.702415	-0.822588	0.944366	0.923167	-0.0881625	-0.442339	-0.15982	91505.4	4	1.02874	0.862369	-0.576057	0.786231	0.873134	1.74999	-1.28201	0.12668	0.167186	0.673332	0.121093	0.0469617	0.0935975	O88703	O88703	Potassium/sodium hyperpolarization-activated cyclic nucleotide-gated channel 2
-0.345604	0.116632	0.0458811	-0.469116	-0.45071	-0.170058	-0.237769	-0.228109	0.49121	-0.0254738	0.182115	0.0382391	0.298298	0.0189377	-0.114986	-0.167518	-0.519775	-0.196897	-0.216407	0.570893	0.0627256	0.452794	0.891646	0.154735	-0.0163338	-0.0508977	0.37363	-0.256134	-0.474155	0.190424	0.0162726	0.0355112	480275	13	0.903499	1.95906	0.499706	0.262591	-0.168651	1.0459	0.484867	0.485507	-0.18349	0.312249	0.356857	0.0470346	0.124882	Q80UG5	Q80UG5	Septin-9
0.338883	0.240626	0.125678	-0.846646	0.304849	-0.721325	0.0448374	0.278725	-0.10371	-0.890079	0.316969	0.285764	0.569359	0.466167	-0.933355	0.360871	-0.844708	-0.890016	-0.027006	0.434092	-0.903996	-0.149355	-0.786035	0.328651	0.302744	0.00833469	0.404703	0.953391	0.389537	0.340915	0.201585	0.39955	137801	2	0.982845	0.123191	-0.250067	2.00883	1.78964	0.712504	-0.997002	0.869101	1.04271	0.128515	0.963242	0.0472816	0.104029	P53612	P53612	Geranylgeranyl transferase type-2 subunit beta
-0.235426	-0.0650345	-0.0325714	-0.68556	0.0344588	-0.0224324	-0.0611464	0.169279	0.0742325	-0.193995	-0.0379284	0.0742325	0.212997	0.0543274	0.162749	0.32782	-0.0648664	0.0997016	-0.0857025	0.316379	0.0356671	0.254819	-0.0404955	0.126863	0.0574893	-0.559725	0.182041	-0.04258	0.0750693	-0.125106	-0.0154375	0.00988237	537528	8	0.661597	0.879439	0.358957	0.684337	-0.227425	0.884739	0.356106	0.677054	-0.230276	0.645255	0.65959	0.0473167	0.217973	Q8C437	Q8C437	PEX5-related protein
6.46547	-0.838584	-0.865365	1.19025	1.96329	-0.918503	-0.916343	1.54094	-0.865865	-0.887693	-0.649074	-0.688753	-0.780154	-0.940508	-0.90528	-0.884998	4.46113	-0.903732	-0.938991	-0.630077	-0.922664	-0.921568	-0.942477	-0.80908	-0.783673	2.51518	-0.811555	2.96956	-0.783427	-0.946655	-0.733096	-0.837688	118338	3	0.68267	1.20324	-2.03098	0.453728	1.06158	0.785518	-1.81179	0.827695	1.28077	0.520859	0.724377	0.0473614	0.207649	Q99M71	Q99M71	Mammalian ependymin-related protein 1
0.0282221	-0.355252	0.35506	0.184284	0.835372	0.56775	0.514866	0.0983154	-0.370724	0.275959	-0.478246	-0.26108	-0.374291	-0.483454	0.0713844	0.0525683	0.1413	-0.259315	0.369685	-0.589445	0.232618	0.00833606	-0.103761	-0.3542	-0.158633	0.391622	-0.383557	0.858736	-0.224473	-0.0590837	-0.295538	-0.235022	112135	11	1.07298	1.86884	-0.687048	0.106669	0.0781857	1.07859	-0.487083	0.517469	0.278151	0.110125	0.575776	0.047418	0.0845326	Q9CZW4	Q9CZW4	Long-chain-fatty-acid--CoA ligase 3
-0.292662	0.106322	-0.0712041	-0.370884	-0.0673502	-0.107184	-0.144287	0.0699821	0.0637984	-0.0496406	0.109093	-0.102084	0.396848	0.330108	-0.0358679	-0.00346246	-0.552628	0.702069	-0.167055	0.141379	0.28397	0.263572	-0.049721	0.49057	-0.0967829	-0.418669	0.0855228	-0.564233	-0.335507	0.141178	0.441219	-0.196409	2.49032e+06	5	0.617984	1.442	0.295765	0.636081	-0.366381	0.601551	0.281826	0.998351	-0.380319	0.826577	0.760017	0.0474203	0.241	Q9R0I7	Q9R0I7	YLP motif-containing protein 1
0.0175503	0.0302611	0.00859004	-0.0761088	0.38078	0.0664559	-0.0291922	-0.0843835	-0.32082	0.0786405	-0.101342	-0.0391405	0.126934	0.0215131	-0.0759842	0.0769292	-0.194616	0.0578815	0.0365225	-0.144886	-0.00785823	-0.0357912	-0.0982813	-0.114578	0.122384	0.0223372	0.0628062	0.28817	-0.105618	-0.0375907	-0.0138815	0.082316	800127	7	0.636265	0.458877	-0.10241	1.35787	0.165399	0.989119	-0.143567	0.632849	0.124242	0.629572	0.882135	0.0474414	0.231065	P61082	P61082	NEDD8-conjugating enzyme Ubc12
-0.161965	0.150196	-0.312316	-0.480154	-0.182107	-0.299034	-0.302999	-0.112998	0.102061	-0.273698	0.0800558	0.219861	0.357366	0.383852	-0.122475	0.209671	-0.212637	0.000439611	-0.239917	0.130332	0.0325954	0.0329927	0.037353	0.439202	0.236673	-0.177349	0.292659	0.0795404	-0.280161	0.00682318	0.408078	-0.0419453	252209	3	1.82135	2.14205	0.513215	0.111477	0.0456307	1.59938	0.392677	0.186056	-0.0749073	0.0195459	0.169968	0.0475237	0.0150888	Q63850	Q63850	Nuclear pore glycoprotein p62
-0.256182	-0.101172	0.0286158	-0.139777	0.0449736	0.102908	-0.0915961	-0.0444268	-0.164223	-0.0217051	-0.120623	-0.113664	0.0169573	0.205158	0.0441409	0.03272	0.0517554	0.109274	-0.064235	0.160072	0.0442003	0.0706702	0.115579	0.244713	-0.0677444	0.00726295	-0.00867887	-0.141382	-0.013854	0.000242968	-0.0441299	0.114151	1.68119e+06	27	1.36166	0.316802	0.0636258	1.75623	-0.153445	1.85561	0.216514	0.00266797	-0.000556469	0.399358	0.049036	0.0479583	0.0434848	G5E8K5	G5E8K5	Ankyrin-3
-0.450837	0.0574424	-0.161757	0.00145748	0.51908	-0.0978473	-0.058573	-0.145177	-0.299627	0.126709	-0.0781927	0.122369	0.281964	-0.0153719	0.0945891	0.0406252	-0.0394974	-0.110218	0.354104	0.0800075	-0.0814688	0.303014	0.35162	0.0257489	-0.170721	0.0406252	-0.354796	-0.224779	-0.263024	0.215027	0.0222953	-0.0847914	84557.8	6	0.693354	0.372082	0.140819	1.4016	-0.31498	0.761442	0.243462	0.813466	-0.212337	0.436119	0.888721	0.0480165	0.202603	Q8K0C9	Q8K0C9	GDP-mannose 4,6 dehydratase
-0.269405	0.0614969	-0.0103687	-0.331755	-0.248424	-0.0539257	-0.173485	-0.183355	0.0671112	-0.283588	0.00635723	0.181293	0.0668756	0.206411	0.485894	0.107891	-0.577316	0.340449	-0.185778	0.35026	0.107064	0.139923	0.582937	0.432706	-0.0805203	-0.289321	0.294469	-0.739498	-0.515893	0.265806	0.122193	0.123494	169204	15	0.599914	1.8357	0.370972	0.585038	-0.423559	0.828369	0.357069	0.758835	-0.437461	0.892219	0.835936	0.0482029	0.251239	P23116	P23116	Eukaryotic translation initiation factor 3 subunit A
-0.11514	0.0671746	-0.24429	-0.128394	-0.377987	-0.00256126	-0.362515	-0.194243	0.0985042	-0.30574	0.251505	-0.0109025	0.140998	0.403059	0.0317749	-0.0947354	-0.137853	-0.0357611	-0.177616	0.278325	0.253467	0.488375	-0.0624165	0.233154	0.0377148	-0.254977	0.279095	-0.487724	-0.351698	-0.167533	0.238929	0.710012	5.45487e+06	46	0.758094	1.51213	0.354023	0.427506	-0.212807	1.79408	0.406184	0.302783	-0.160645	0.610973	0.378677	0.0482964	0.174544	P08553	P08553	Neurofilament medium polypeptide
0.0237383	0.0116614	-0.0695264	-0.501848	0.109288	-0.314029	0.016199	-0.130329	-0.102441	-0.327433	0.455573	0.10119	0.287089	0.510964	0.106565	0.185624	-0.0858254	0.229183	-0.299369	0.283007	-0.128409	-0.0520035	-0.0526675	0.373686	-0.0843945	-0.445653	0.0489389	-0.117693	-0.299754	-0.0439406	0.454874	-0.142266	286499	6	0.69101	1.11288	0.366869	0.471025	-0.183578	0.613742	0.21879	0.939188	-0.331656	0.497845	0.675579	0.0485365	0.2037	P35282	P35282	Ras-related protein Rab-21
0.0235971	0.0738633	0.0814986	-0.340024	-0.294685	-0.294599	-0.147502	-0.183375	0.152944	-0.192078	0.477162	0.0444011	0.396122	0.36993	-0.16116	-0.126367	-0.199079	0.278098	-0.112911	-0.0330228	0.0654068	0.188444	0.297663	0.00871482	0.0241589	-0.396068	0.188429	-0.64521	-0.197365	0.12282	0.464773	0.0654209	694101	13	0.610235	1.37738	0.361233	0.477474	-0.248539	1.37751	0.302625	0.580832	-0.307147	0.706077	0.987911	0.0486436	0.245338	O08532	O08532	Voltage-dependent calcium channel subunit alpha-2/delta-1;Voltage-dependent calcium channel subunit alpha-2-1;Voltage-dependent calcium channel subunit delta-1
-0.594548	-0.143591	0.022507	-0.198726	0.118083	0.584061	-0.334743	-0.170167	0.148972	-0.0284493	-0.13687	0.22841	-0.0193593	-0.126317	-0.103092	-0.218811	0.0503728	-0.146903	-0.238917	0.304863	0.0852485	0.334153	0.982581	0.432927	-0.282882	0.124091	-0.327617	-0.0344573	-0.196068	-0.0340915	-0.113607	0.0329447	51927.3	10	0.942255	0.3475	0.169114	1.4159	-0.412289	1.04296	0.464752	0.459966	-0.116651	0.396449	0.227908	0.0489038	0.114221	O70481	O70481	E3 ubiquitin-protein ligase UBR1
0.596148	-0.305886	0.298858	1.97176	0.333026	0.231231	0.556238	-0.0436107	-0.195149	0.312459	-0.370172	-0.467167	-0.449848	-0.439212	0.170992	-0.195337	0.646738	-0.127381	0.318248	-0.511217	-0.13011	-0.23134	-0.484438	-0.648613	-0.39968	0.588147	-0.573206	0.308458	0.217582	-0.311204	-0.450601	-0.215715	212487	17	1.37226	2.00923	-0.832934	0.10322	0.097322	1.51107	-0.817668	0.148421	0.112588	0.11488	0.130054	0.0490214	0.0424366	P70175	P70175	Disks large homolog 3
0.170865	-0.645398	0.340387	2.41788	0.532593	0.378829	0.702148	-0.163094	-0.313981	0.728913	-0.683619	-0.541785	-0.726084	-0.31087	-0.0554995	-0.23459	1.19372	-0.450617	0.56257	-0.544427	-0.141247	-0.617897	-0.578185	-0.787828	-0.520406	1.28268	0.074745	0.214459	0.071132	-0.614351	-0.527967	-0.213078	298899	6	0.827823	1.35281	-0.991364	0.349179	0.390175	1.10913	-0.978529	0.43603	0.403009	0.37818	0.398602	0.0490323	0.148654	Q61937	Q61937	Nucleophosmin
-0.349063	0.0598275	-0.266409	-0.38535	-0.123589	0.288266	-0.209816	-0.0864781	-0.328902	-0.219245	-0.179343	0.168326	0.144622	-0.0844384	-0.0561495	0.181964	-0.161481	0.136912	-0.357798	0.465795	0.17897	0.256302	0.328573	1.35597	-0.167151	-0.131414	0.434829	-0.427986	-0.309666	-0.211595	-0.02776	0.083271	69143.4	7	1.04792	0.425835	0.151508	1.07721	-0.451463	1.31798	0.504568	0.229088	-0.098403	0.315505	0.177308	0.049364	0.0895534	Q61739	Q61739	Integrin alpha-6;Integrin alpha-6 heavy chain;Integrin alpha-6 light chain
0.616197	-0.657518	-0.397706	4.53293	-0.0284385	0.325686	1.26193	-0.0623366	-0.271044	-0.0717145	-0.89591	-0.428438	-0.914475	-0.945516	-0.443459	-0.253751	1.2996	-0.698995	0.0152028	-0.947478	-0.129078	-0.595575	-0.867878	-0.968735	-0.285781	0.670921	-0.936533	3.10149	1.27805	-0.796898	-0.944973	-0.559769	246325	7	0.886737	1.79882	-1.99761	0.289142	0.752348	1.47401	-2.06473	0.292921	0.685232	0.36025	0.31164	0.0494133	0.129796	Q9QXV0	Q9QXV0	ProSAAS;KEP;Big SAAS;Little SAAS;Big PEN-LEN;PEN;PEN-20;PEN-19;Little LEN;Big LEN
-0.0693115	-0.0702449	-0.0186597	-0.236936	0.0103437	-0.526547	0.152717	-0.260861	-0.0300588	-0.291694	0.191964	-0.0931711	0.139073	0.470801	0.297508	0.368839	0.742242	-0.268281	0.759471	1.02607	-0.432912	-0.236587	-0.293292	-0.0818184	-0.519801	-0.513549	0.326022	-0.241775	0.0797284	-0.25939	0.31086	-0.430747	16046.6	4	0.630773	NaN	0	NaN	0	NaN	0	NaN	0	0.968181	0.580107	0.0496439	0.234006	Q5BLK4	Q5BLK4	Terminal uridylyltransferase 7
-0.65971	0.660386	-0.360854	-0.97852	-0.497818	-0.568175	-0.500492	-0.292064	0.53387	-0.52708	0.253519	0.298302	0.52259	1.13988	-0.268581	0.248631	-0.586464	-0.174434	-0.456876	1.19152	-0.0254506	-0.0970065	-0.08671	1.11766	0.50882	-0.600787	0.4925	-0.187466	-0.455216	-0.249678	0.589444	0.0162591	325340	2	1.33935	1.40166	1.56599	0.0597559	-0.0650034	1.02086	1.27291	0.481767	-0.358078	0.0694592	0.259635	0.0496995	0.0457775	Q9DB34	Q9DB34	Charged multivesicular body protein 2a
[truncated: 2 more columns]

## Sheet: C1
Protein IDs	protein names	gene name
D3YZP9	Coiled-coil domain-containing protein 6	Ccdc6
E9Q4N7	AT-rich interactive domain-containing protein 1B	Arid1b
F8VPZ3	Ubiquitinyl hydrolase 1	Usp32
O35671	Integrin beta-1-binding protein 1	Itgb1bp1
O70481	E3 ubiquitin-protein ligase UBR1	Ubr1
O88271	Craniofacial development protein 1	Cfdp1
O89032	SH3 and PX domain-containing protein 2A	Sh3pxd2a
P07758	Alpha-1-antitrypsin 1-1	Serpina1a
P09528	Ferritin heavy chain	Fth1
P0C090	Roquin-2	Rc3h2
P21107	Tropomyosin alpha-3 chain	Tpm3
P22599	Alpha-1-antitrypsin 1-2	Serpina1b
P35285	Ras-related protein Rab-22A	Rab22a
P35288	Ras-related protein Rab-23	Rab23
P52479	Ubiquitin carboxyl-terminal hydrolase 10	Usp10
P53612	Geranylgeranyl transferase type-2 subunit beta	Rabggtb
P59823	Interleukin-1 receptor accessory protein-like 1	Il1rapl1
P61290	Proteasome activator complex subunit 3	Psme3
P62069	Ubiquitin carboxyl-terminal hydrolase 46	Usp46
P62897	Cytochrome c, somatic	Cycs
P70407	Cadherin-9	Cdh9
Q00896	Alpha-1-antitrypsin 1-3	Serpina1c
Q00897	Alpha-1-antitrypsin 1-4	Serpina1d
Q00898	Alpha-1-antitrypsin 1-5	Serpina1e
Q00915	Retinol-binding protein 1	Rbp1
Q0PMG2	MAM domain-containing lycosylphosphatidylinositol anchor protein 1	Mdga1
Q14BI1	Slc24a2 protein	Slc24a2
Q2M3X8	Phosphatase and actin regulator 1	Phactr1
Q3TC33	Coiled-coil domain-containing protein 127	Ccdc127
Q3UY34	Protein CUSTOS	Custos
Q5BLK4	Terminal uridylyltransferase 7	Tut7
Q60739	BAG family molecular chaperone regulator 1	Bag1
Q61036	Serine/threonine-protein kinase PAK 3	Pak3
Q61220	Protein kinase C-binding protein NELL2	Nell2
Q61739	Integrin alpha-6	Itga6
Q62203	Splicing factor 3A subunit 2	Sf3a2
Q64314	Hematopoietic progenitor cell antigen CD34	Cd34
Q68ED2	Metabotropic glutamate receptor 7	Grm7
Q6P549	Phosphatidylinositol 3,4,5-trisphosphate 5-phosphatase 2	Inppl1
Q80Y98	Phospholipase DDHD2	Ddhd2
Q8BGW1	Alpha-ketoglutarate-dependent dioxygenase FTO	Fto
Q8BH44	Coronin-2B	Coro2b
Q8BK30	NADH dehydrogenase [ubiquinone] flavoprotein 3, mitochondrial	Ndufv3
Q8BLQ9	Cell adhesion molecule 2	Cadm2
Q8BM72	Heat shock 70 kDa protein 13	Hspa13
Q8CFE6	Sodium-coupled neutral amino acid transporter 2	Slc38a2
Q8CH72	E3 ubiquitin-protein ligase TRIM32	Trim32
Q8K0C4	Lanosterol 14-alpha demethylase	Cyp51a1
Q8K0F1	TBC1 domain family member 23	Tbc1d23
Q8K2Q9	Shootin-1	Shtn1
Q8R0J7	Vacuolar protein sorting-associated protein 37B	Vps37b
Q8R0P4	Mth938 domain-containing protein	Aamdc
Q8R373	CXADR-like membrane protein	Clmp
Q8R3L2	Transcription factor 25	Tcf25
Q8R422	CD109 antigen	Cd109
c	Coiled-coil domain-containing protein 92	Ccdc92
Q91W92	Cdc42 effector protein 1	Cdc42ep1
Q921S7	39S ribosomal protein L37, mitochondrial	Mrpl37
Q924M7	Mannose-6-phosphate isomerase	Mpi
Q9CQF9	Prenylcysteine oxidase	Pcyox1
Q9CQQ7	ATP synthase F(0) complex subunit B1, mitochondrial	Atp5pb
Q9CQX8	28S ribosomal protein S36, mitochondrial	Mrps36
Q9CR21	Acyl carrier protein, mitochondrial	Ndufab1
Q9CSH3	Exosome complex exonuclease RRP44	Dis3
Q9CWN7	CCR4-NOT transcription complex subunit 11	Cnot11
Q9CY57	Chromatin target of PRMT1 protein	Chtop
Q9CYK1	Tryptophan--tRNA ligase, mitochondrial	Wars2
Q9CZL5	Pterin-4-alpha-carbinolamine dehydratase 2	Pcbd2
Q9CZU3	Exosome RNA helicase MTR4	Mtrex
Q9D2R0	Acetoacetyl-CoA synthetase	Aacs
Q9D5V6	Synapse-associated protein 1	Syap1
Q9D7N6	39S ribosomal protein L30, mitochondrial	Mrpl30
Q9DBR2	Protein FAM13C	Fam13c
Q9ER88	28S ribosomal protein S29, mitochondrial	Dap3
Q9EST3	Eukaryotic translation initiation factor 4E transporter	Eif4enif1
Q9JIX8	Apoptotic chromatin condensation inducer in the nucleus	Acin1
Q9JLB9	Nectin-3	Nectin3
Q9WU42	Nuclear receptor corepressor 2	Ncor2
Q9Z2M6	Ubiquitin-like protein 3	Ubl3
Q9Z2Q5	39S ribosomal protein L40, mitochondrial	Mrpl40

## Sheet: GO_C1
GO ID	GO description	p-val	corrected p-val	cluster frequency	total frequency	genes
313	organellar ribosome	9.4001E-5	4.3287E-2	4/54 7.4%	15/3129 0.4%	Q9Z2Q5 Q9D7N6 Q921S7 Q9ER88
5761	mitochondrial ribosome	9.4001E-5	4.3287E-2	4/54 7.4%	15/3129 0.4%	Q9Z2Q5 Q9D7N6 Q921S7 Q9ER88

## Sheet: C1-terms
GO ID	GO description	cluster frequency	genes
44464	cell part	45/54 83.3%	P09528 Q8BK30 Q8BM72 P0C090 Q9CZU3 Q9CQQ7 Q8K0F1 Q9ER88 Q68ED2 Q9CR21 P61290 Q9CQF9 Q9CZL5 Q91W92 Q14BI1 Q5BLK4 P35285 Q8CFE6 Q9CSH3 Q9D7N6 Q8R422 Q9CY57 P62897 Q00915 Q9WU42 Q9Z2Q5 Q8R0J7 Q8BH44 Q9D5V6 Q8K2Q9 Q924M7 Q8BGW1 Q8CH72 Q80Y98 Q9Z2M6 Q9CQX8 Q8K0C4 Q9D2R0 Q8BLQ9 Q8R373 Q921S7 Q6P549 Q2M3X8 Q8R3L2 Q9JLB9
5623	cell	45/54 83.3%	P09528 Q8BK30 Q8BM72 P0C090 Q9CZU3 Q9CQQ7 Q8K0F1 Q9ER88 Q68ED2 Q9CR21 P61290 Q9CQF9 Q9CZL5 Q91W92 Q14BI1 Q5BLK4 P35285 Q8CFE6 Q9CSH3 Q9D7N6 Q8R422 Q9CY57 P62897 Q00915 Q9WU42 Q9Z2Q5 Q8R0J7 Q8BH44 Q9D5V6 Q8K2Q9 Q924M7 Q8BGW1 Q8CH72 Q80Y98 Q9Z2M6 Q9CQX8 Q8K0C4 Q9D2R0 Q8BLQ9 Q8R373 Q921S7 Q6P549 Q2M3X8 Q8R3L2 Q9JLB9
5622	intracellular	38/54 70.3%	P09528 Q8BK30 Q8BM72 P0C090 Q9CZU3 Q9CQQ7 Q8K0F1 Q9ER88 Q68ED2 Q9CR21 P61290 Q9CQF9 Q9CZL5 Q91W92 Q5BLK4 P35285 Q9CSH3 Q9D7N6 Q9CY57 P62897 Q00915 Q9WU42 Q9Z2Q5 Q8R0J7 Q8BH44 Q9D5V6 Q924M7 Q8BGW1 Q8CH72 Q80Y98 Q9CQX8 Q8K0C4 Q9D2R0 Q8BLQ9 Q921S7 Q6P549 Q2M3X8 Q8R3L2
44424	intracellular part	36/54 66.6%	P09528 Q8BK30 Q8BM72 P0C090 Q9CZU3 Q9CQQ7 Q9ER88 Q68ED2 Q9CR21 P61290 Q9CQF9 Q9CZL5 Q91W92 P35285 Q9CSH3 Q9D7N6 Q9CY57 P62897 Q00915 Q9WU42 Q9Z2Q5 Q8R0J7 Q8BH44 Q9D5V6 Q924M7 Q8BGW1 Q8CH72 Q80Y98 Q9CQX8 Q8K0C4 Q9D2R0 Q8BLQ9 Q921S7 Q6P549 Q2M3X8 Q8R3L2
9987	cellular process	31/54 57.4%	P09528 Q8BK30 Q9CZU3 Q9CQQ7 Q9ER88 Q68ED2 Q9CR21 P61290 Q61036 Q9CQF9 Q9CZL5 Q14BI1 P35285 Q8CFE6 Q9CSH3 Q9D7N6 Q9CY57 P62897 Q00915 Q9WU42 O88271 Q8K2Q9 Q924M7 Q8BGW1 Q8CH72 Q8K0C4 Q9D2R0 P62069 Q921S7 Q6P549 Q9JLB9
5737	cytoplasm	30/54 55.5%	P09528 Q8BK30 Q8BM72 P0C090 Q9CQQ7 Q9ER88 Q68ED2 Q9CR21 P61290 Q9CQF9 Q9CZL5 Q91W92 P35285 Q9CSH3 Q9D7N6 P62897 Q00915 Q9Z2Q5 Q8R0J7 Q8BH44 Q924M7 Q8CH72 Q80Y98 Q9CQX8 Q8K0C4 Q9D2R0 Q8BLQ9 Q921S7 Q6P549 Q2M3X8
43229	intracellular organelle	29/54 53.7%	P09528 Q8BK30 Q8BM72 Q9CZU3 Q9CQQ7 Q9ER88 Q68ED2 Q9CR21 P61290 Q9CQF9 Q9CZL5 Q91W92 P35285 Q9CSH3 Q9D7N6 Q9CY57 P62897 Q9WU42 Q9Z2Q5 Q8R0J7 Q8BH44 Q9D5V6 Q8BGW1 Q8CH72 Q9CQX8 Q8K0C4 Q921S7 Q6P549 Q8R3L2
43226	organelle	29/54 53.7%	P09528 Q8BK30 Q8BM72 Q9CZU3 Q9CQQ7 Q9ER88 Q68ED2 Q9CR21 P61290 Q9CQF9 Q9CZL5 Q91W92 P35285 Q9CSH3 Q9D7N6 Q9CY57 P62897 Q9WU42 Q9Z2Q5 Q8R0J7 Q8BH44 Q9D5V6 Q8BGW1 Q8CH72 Q9CQX8 Q8K0C4 Q921S7 Q6P549 Q8R3L2
43231	intracellular membrane-bounded organelle	26/54 48.1%	P09528 Q8BK30 Q8BM72 Q9CZU3 Q9CQQ7 Q9ER88 Q68ED2 Q9CR21 P61290 Q9CQF9 Q9CZL5 P35285 Q9CSH3 Q9D7N6 Q9CY57 P62897 Q9WU42 Q9Z2Q5 Q8R0J7 Q9D5V6 Q8BGW1 Q8CH72 Q9CQX8 Q8K0C4 Q921S7 Q8R3L2
43227	membrane-bounded organelle	26/54 48.1%	P09528 Q8BK30 Q8BM72 Q9CZU3 Q9CQQ7 Q9ER88 Q68ED2 Q9CR21 P61290 Q9CQF9 Q9CZL5 P35285 Q9CSH3 Q9D7N6 Q9CY57 P62897 Q9WU42 Q9Z2Q5 Q8R0J7 Q9D5V6 Q8BGW1 Q8CH72 Q9CQX8 Q8K0C4 Q921S7 Q8R3L2
8152	metabolic process	24/54 44.4%	P09528 Q9WU42 Q8BK30 Q9CZU3 Q9CQQ7 Q924M7 Q8BGW1 Q8CH72 Q80Y98 Q9CR21 Q8K0C4 Q61036 Q9D2R0 Q9CQF9 Q9CZL5 P62069 P35285 Q9CSH3 Q9D7N6 Q921S7 Q6P549 Q9CY57 P62897 Q00915
44237	cellular metabolic process	22/54 40.7%	Q9WU42 Q8BK30 Q9CZU3 Q9CQQ7 Q924M7 Q8BGW1 Q8CH72 Q9CR21 Q8K0C4 Q61036 Q9D2R0 Q9CQF9 Q9CZL5 P62069 P35285 Q9CSH3 Q9D7N6 Q921S7 Q6P549 Q9CY57 P62897 Q00915
44238	primary metabolic process	20/54 37.0%	Q9WU42 Q9CZU3 Q9CQQ7 Q924M7 Q8BGW1 Q8CH72 Q80Y98 Q9CR21 Q8K0C4 Q61036 Q9D2R0 Q9CQF9 P62069 P35285 Q9CSH3 Q9D7N6 Q921S7 Q6P549 Q9CY57 Q00915
44444	cytoplasmic part	18/54 33.3%	P09528 Q8BK30 Q8BM72 Q9Z2Q5 Q8R0J7 Q9CQQ7 Q9ER88 Q68ED2 Q9CR21 Q9CQX8 Q8K0C4 Q9D2R0 Q9CQF9 Q9CZL5 P35285 Q9D7N6 Q921S7 P62897
5739	mitochondrion	11/54 20.3%	P09528 Q8BK30 Q9Z2Q5 Q9CZL5 Q9CQQ7 Q9D7N6 Q921S7 Q9ER88 Q9CR21 Q9CQX8 P62897
44281	small molecule metabolic process	10/54 18.5%	Q9CQF9 P35285 Q9CQQ7 Q924M7 Q6P549 Q8BGW1 Q9CR21 Q8K0C4 Q00915 Q9D2R0
65008	regulation of biological quality	8/54 14.8%	P09528 Q9WU42 O88271 Q91W92 Q14BI1 Q8K2Q9 Q8BGW1 Q00915
55114	oxidation reduction	7/54 12.9%	P09528 Q8BK30 Q9CQF9 Q8BGW1 Q9CR21 Q8K0C4 P62897
30529	ribonucleoprotein complex	6/54 11.1%	Q9Z2Q5 Q9CZU3 Q9D7N6 Q921S7 Q9ER88 Q9CQX8
44429	mitochondrial part	6/54 11.1%	Q8BK30 Q9Z2Q5 Q9CQQ7 Q9D7N6 Q921S7 Q9ER88
6629	lipid metabolic process	6/54 11.1%	Q6P549 Q80Y98 Q9CR21 Q8K0C4 Q00915 Q9D2R0
5840	ribosome	5/54 9.2%	Q9Z2Q5 Q9D7N6 Q921S7 Q9ER88 Q9CQX8
313	organellar ribosome	4/54 7.4%	Q9Z2Q5 Q9D7N6 Q921S7 Q9ER88
5761	mitochondrial ribosome	4/54 7.4%	Q9Z2Q5 Q9D7N6 Q921S7 Q9ER88
31980	mitochondrial lumen	4/54 7.4%	Q9Z2Q5 Q9D7N6 Q921S7 Q9ER88
5759	mitochondrial matrix	4/54 7.4%	Q9Z2Q5 Q9D7N6 Q921S7 Q9ER88
6091	generation of precursor metabolites and energy	4/54 7.4%	Q8BK30 Q9CQQ7 Q9CR21 P62897
22900	electron transport chain	3/54 5.5%	Q8BK30 Q9CR21 P62897
16705	oxidoreductase activity, acting on paired donors, with incorporation or reduction of molecular oxygen	3/54 5.5%	Q9CZL5 Q8BGW1 Q8K0C4
32451	demethylase activity	2/54 3.7%	Q8BGW1 Q8K0C4
70988	demethylation	2/54 3.7%	Q8BGW1 Q8K0C4

## Sheet: C2
Protein IDs	protein names	gene name
A2CG49	Kalirin	Kalrn
D3YVF0	A-kinase anchor protein 5	Akap5
E9PVZ8	Golgi autoantigen, golgin subfamily b, macrogolgin 1	Golgb1
G5E8K5	Ankyrin-3	Ank3
O08532	Voltage-dependent calcium channel subunit alpha-2/delta-1	Cacna2d1
O08539	Myc box-dependent-interacting protein 1	Bin1
O88643	Serine/threonine-protein kinase PAK 1	Pak1
P08553	Neurofilament medium polypeptide	Nefm
P11881	Inositol 1,4,5-trisphosphate receptor type 1	Itpr1
P23116	Eukaryotic translation initiation factor 3 subunit A	Eif3a
P27546	Microtubule-associated protein 4	Map4
P32233	Developmentally-regulated GTP-binding protein 1	Drg1
P35282	Ras-related protein Rab-21	Rab21
P39447	Tight junction protein ZO-1	Tjp1
P47757	F-actin-capping protein subunit beta	Capzb
P50518	V-type proton ATPase subunit E 1	Atp6v1e1
P61082	NEDD8-conjugating enzyme Ubc12	Ube2m
P70227	Inositol 1,4,5-trisphosphate receptor type 3	Itpr3
P70336	Rho-associated protein kinase 2	Rock2
P80316	T-complex protein 1 subunit epsilon	Cct5
P97315	Cysteine and glycine-rich protein 1	Csrp1
P97393	Rho GTPase-activating protein 5	Arhgap5
Q05A62	Dynein axonemal light chain 1	Dnal1
Q14CH0	Protein FAM171B	Fam171b
Q3TMH2	Secernin-3	Scrn3
Q3UKC1	Tax1-binding protein 1 homolog	Tax1bp1
Q5H8C4	Vacuolar protein sorting-associated protein 13A	Vps13a
Q5M8N0	CB1 cannabinoid receptor-interacting protein 1	Cnrip1
Q5QNQ6	Oxysterol-binding protein 2	Osbp2
Q5SNZ0	Girdin	Ccdc88a
Q5SXY1	Cytospin-B	Specc1
Q61301	Catenin alpha-2	Ctnna2
Q63850	Nuclear pore glycoprotein p62	Nup62
Q63918	Caveolae-associated protein 2	Cavin2
Q64727	Vinculin	Vcl
Q6PGL7	WASH complex subunit 2	Washc2
Q6PHU5	Sortilin	Sort1
Q6ZWR6	Nesprin-1	Syne1
Q71RI9	Kynurenine--oxoglutarate transaminase 3	Kyat3
Q80UG5	Septin-9	Septin9
Q8BIK4	Dedicator of cytokinesis protein 9	Dock9
Q8BNY6	Neuronal calcium sensor 1	Ncs1
Q8BWG8	Beta-arrestin-1	Arrb1
Q8C166	Copine-1	Cpne1
Q8C437	PEX5-related protein	Pex5l
Q8K0C9	GDP-mannose 4,6 dehydratase	Gmds
Q8K2K6	Arf-GAP domain and FG repeat-containing protein 1	Agfg1
Q8VDN2	Sodium/potassium-transporting ATPase subunit alpha-1	Atp1a1
Q91WS0	CDGSH iron-sulfur domain-containing protein 1	Cisd1
Q91YN0	Protein C12orf4 homolog	D6Wsu163e
Q91YP2	Neurolysin, mitochondrial	Nln
Q99P72	Reticulon-4	Rtn4
Q9CWK8	Sorting nexin-2	Snx2
Q9D593	V-type proton ATPase subunit E 2	Atp6v1e2
Q9DBG6	Dolichyl-diphosphooligosaccharide--protein glycosyltransferase subunit 2	Rpn2
Q9DCP2	Sodium-coupled neutral amino acid transporter 3	Slc38a3
Q9ERF3	WD repeat-containing protein 61	Wdr61
Q9ERG2	Striatin-3	Strn3
Q9ES97	Reticulon-3	Rtn3
Q9JJ28	Protein flightless-1 homolog	Flii
Q9QXG2	Rab proteins eranylgeranyltransferase component A 1	Chm
Q9QZB7	Actin-related protein 10	Actr10
Q9R0I7	YLP motif-containing protein 1	Ylpm1
Q9WV60	Glycogen synthase kinase-3 beta	Gsk3b
Q9WV92	Band 4.1-like protein 3	Epb41l3
Q9Z1Z2	Serine-threonine kinase receptor-associated protein	Strap
Q9Z2Y3	Homer protein homolog 1	Homer1

## Sheet: GO_C2
GO ID	GO description	p-val	corrected p-val	cluster frequency	total frequency	genes
10975	regulation of neuron projection development	1.4949E-6	1.2572E-3	7/50 14.0%	38/3129 1.2%	A2CG49 Q9WV60 P08553 Q99P72 Q8BNY6 Q6ZWR6 Q5SNZ0
31344	regulation of cell projection organization	3.0441E-6	1.2572E-3	7/50 14.0%	42/3129 1.3%	A2CG49 Q9WV60 P08553 Q99P72 Q8BNY6 Q6ZWR6 Q5SNZ0
45664	regulation of neuron differentiation	3.5920E-6	1.2572E-3	7/50 14.0%	43/3129 1.3%	A2CG49 Q9WV60 P08553 Q99P72 Q8BNY6 Q6ZWR6 Q5SNZ0
51128	regulation of cellular component organization	5.2674E-6	1.3827E-3	11/50 22.0%	134/3129 4.2%	Q61301 A2CG49 Q9WV60 P08553 P27546 P47757 Q99P72 P70336 Q8BNY6 Q6ZWR6 Q5SNZ0
50767	regulation of neurogenesis	7.7232E-6	1.3985E-3	7/50 14.0%	48/3129 1.5%	A2CG49 Q9WV60 P08553 Q99P72 Q8BNY6 Q6ZWR6 Q5SNZ0
60284	regulation of cell development	8.9015E-6	1.3985E-3	7/50 14.0%	49/3129 1.5%	A2CG49 Q9WV60 P08553 Q99P72 Q8BNY6 Q6ZWR6 Q5SNZ0
51960	regulation of nervous system development	1.0225E-5	1.3985E-3	7/50 14.0%	50/3129 1.5%	A2CG49 Q9WV60 P08553 Q99P72 Q8BNY6 Q6ZWR6 Q5SNZ0
5856	cytoskeleton	1.0655E-5	1.3985E-3	16/50 32.0%	306/3129 9.7%	Q61301 Q64727 Q9WV92 Q9QZB7 P97315 Q63850 P70336 Q9JJ28 A2CG49 P23116 P08553 P27546 P47757 Q6ZWR6 Q80UG5 P80316
42995	cell projection	3.3735E-5	3.9357E-3	14/50 28.0%	261/3129 8.3%	Q61301 Q8BWG8 Q9WV92 Q9WV60 Q8K2K6 Q6PHU5 Q99P72 Q8C437 A2CG49 P08553 P47757 Q8BNY6 Q6ZWR6 Q5SNZ0
45595	regulation of cell differentiation	8.7643E-5	9.2025E-3	7/50 14.0%	69/3129 2.2%	A2CG49 Q9WV60 P08553 Q99P72 Q8BNY6 Q6ZWR6 Q5SNZ0
43005	neuron projection	3.3675E-4	3.2144E-2	10/50 20.0%	175/3129 5.5%	Q8C437 Q61301 A2CG49 Q9WV92 Q9WV60 P08553 Q6PHU5 Q99P72 Q8BNY6 Q6ZWR6
10769	regulation of cell morphogenesis involved in differentiation	5.7021E-4	4.6774E-2	4/50 8.0%	25/3129 0.7%	Q9WV60 P08553 Q99P72 Q6ZWR6
50773	regulation of dendrite development	5.7911E-4	4.6774E-2	3/50 6.0%	11/3129 0.3%	A2CG49 Q9WV60 Q6ZWR6
5488	binding	2.6198E-3	4.9241E-2	29/54 53.7%	10294/30012 34.2%	P09528 Q8BM72 P0C090 Q9CZU3 O35671 Q68ED2 Q9CR21 Q61036 Q9CZL5 Q91W92 Q14BI1 Q5BLK4 P35285 Q9CSH3 Q8R422 P62897 Q00915 Q9WU42 Q8BH44 Q924M7 Q8BGW1 Q8CH72 Q80Y98 Q8K0C4 Q9D2R0 Q8BLQ9 Q6P549 Q2M3X8 Q9JLB9

## Sheet: C2-terms
GO ID	GO description	cluster frequency	genes
5623	cell	41/50 82.0%	Q71RI9 Q8BWG8 Q91YP2 Q64727 Q9WV92 Q3UKC1 Q63850 Q8C437 O08532 P35282 Q8K0C9 Q9DCP2 Q63918 P27546 P47757 Q80UG5 Q61301 Q9WV60 Q9QZB7 P97315 Q8K2K6 P32233 Q6PHU5 Q99P72 P70336 Q8VDN2 Q9DBG6 Q5QNQ6 Q9JJ28 A2CG49 Q6PGL7 Q9Z1Z2 Q14CH0 Q9R0I7 Q91WS0 P23116 P08553 Q8BNY6 Q6ZWR6 P80316 Q5SNZ0
44464	cell part	41/50 82.0%	Q71RI9 Q8BWG8 Q91YP2 Q64727 Q9WV92 Q3UKC1 Q63850 Q8C437 O08532 P35282 Q8K0C9 Q9DCP2 Q63918 P27546 P47757 Q80UG5 Q61301 Q9WV60 Q9QZB7 P97315 Q8K2K6 P32233 Q6PHU5 Q99P72 P70336 Q8VDN2 Q9DBG6 Q5QNQ6 Q9JJ28 A2CG49 Q6PGL7 Q9Z1Z2 Q14CH0 Q9R0I7 Q91WS0 P23116 P08553 Q8BNY6 Q6ZWR6 P80316 Q5SNZ0
5622	intracellular	38/50 76.0%	Q71RI9 Q8BWG8 Q91YP2 Q64727 Q9WV92 Q3UKC1 Q63850 Q8C437 O08532 P35282 Q8K0C9 Q63918 P27546 P47757 Q80UG5 Q61301 Q9WV60 Q9QZB7 P97315 Q8K2K6 P32233 Q6PHU5 Q99P72 P70336 Q8VDN2 Q9DBG6 Q9JJ28 A2CG49 Q6PGL7 Q9Z1Z2 Q9R0I7 Q91WS0 P23116 P08553 Q8BNY6 Q6ZWR6 P80316 Q5SNZ0
5622	intracellular	38/50 76.0%	Q71RI9 Q8BWG8 Q91YP2 Q64727 Q9WV92 Q3UKC1 Q63850 Q8C437 O08532 P35282 Q8K0C9 Q63918 P27546 P47757 Q80UG5 Q61301 Q9WV60 Q9QZB7 P97315 Q8K2K6 P32233 Q6PHU5 Q99P72 P70336 Q8VDN2 Q9DBG6 Q9JJ28 A2CG49 Q6PGL7 Q9Z1Z2 Q9R0I7 Q91WS0 P23116 P08553 Q8BNY6 Q6ZWR6 P80316 Q5SNZ0
44424	intracellular part	36/50 72.0%	Q71RI9 Q8BWG8 Q91YP2 Q64727 Q9WV92 Q63850 Q8C437 O08532 P35282 Q63918 P27546 P47757 Q80UG5 Q61301 Q9WV60 Q9QZB7 P97315 Q8K2K6 P32233 Q6PHU5 Q99P72 P70336 Q8VDN2 Q9DBG6 Q9JJ28 A2CG49 Q6PGL7 Q9Z1Z2 Q9R0I7 Q91WS0 P23116 P08553 Q8BNY6 Q6ZWR6 P80316 Q5SNZ0
44424	intracellular part	36/50 72.0%	Q71RI9 Q8BWG8 Q91YP2 Q64727 Q9WV92 Q63850 Q8C437 O08532 P35282 Q63918 P27546 P47757 Q80UG5 Q61301 Q9WV60 Q9QZB7 P97315 Q8K2K6 P32233 Q6PHU5 Q99P72 P70336 Q8VDN2 Q9DBG6 Q9JJ28 A2CG49 Q6PGL7 Q9Z1Z2 Q9R0I7 Q91WS0 P23116 P08553 Q8BNY6 Q6ZWR6 P80316 Q5SNZ0
5488	binding	36/50 72.0%	Q71RI9 Q8BWG8 Q91YP2 Q64727 Q9WV92 Q3UKC1 Q63850 Q8C437 O08532 Q05A62 P35282 Q8K0C9 Q63918 P47757 Q80UG5 Q61301 Q9WV60 Q9QZB7 P97315 Q8K2K6 P32233 Q99P72 P70336 Q8VDN2 Q9DBG6 Q9JJ28 A2CG49 Q9CWK8 Q9Z1Z2 Q91WS0 P23116 Q8C166 Q8BNY6 Q6ZWR6 P80316 Q5SNZ0
9987	cellular process	33/50 66.0%	Q71RI9 Q8BWG8 Q64727 Q9WV92 Q3UKC1 Q63850 Q8C437 O08532 Q8K0C9 Q9DCP2 P47757 Q80UG5 Q61301 Q9WV60 Q9QZB7 P97315 Q8K2K6 Q6PHU5 Q99P72 P70336 Q8VDN2 Q9DBG6 Q9JJ28 A2CG49 Q9CWK8 Q9Z1Z2 Q9R0I7 P23116 P08553 Q8BNY6 Q6ZWR6 P80316 Q5SNZ0
43226	organelle	33/50 66.0%	Q71RI9 Q8BWG8 Q91YP2 Q64727 Q9WV92 Q63850 O08532 P35282 P27546 P47757 Q80UG5 Q61301 Q9WV60 Q9QZB7 P97315 Q8K2K6 Q6PHU5 Q99P72 P70336 Q8VDN2 Q9DBG6 Q9JJ28 A2CG49 Q6PGL7 Q9Z1Z2 Q9R0I7 Q91WS0 P23116 P08553 Q8BNY6 Q6ZWR6 P80316 Q5SNZ0
43229	intracellular organelle	33/50 66.0%	Q71RI9 Q8BWG8 Q91YP2 Q64727 Q9WV92 Q63850 O08532 P35282 P27546 P47757 Q80UG5 Q61301 Q9WV60 Q9QZB7 P97315 Q8K2K6 Q6PHU5 Q99P72 P70336 Q8VDN2 Q9DBG6 Q9JJ28 A2CG49 Q6PGL7 Q9Z1Z2 Q9R0I7 Q91WS0 P23116 P08553 Q8BNY6 Q6ZWR6 P80316 Q5SNZ0
5737	cytoplasm	32/50 64.0%	Q71RI9 Q8BWG8 Q91YP2 Q64727 Q9WV92 Q63850 Q8C437 O08532 P35282 Q63918 P47757 Q80UG5 Q61301 Q9WV60 Q9QZB7 Q8K2K6 P32233 Q6PHU5 Q99P72 P70336 Q8VDN2 Q9DBG6 Q9JJ28 A2CG49 Q6PGL7 Q9Z1Z2 Q91WS0 P23116 Q8BNY6 Q6ZWR6 P80316 Q5SNZ0
65007	biological regulation	25/50 50.0%	Q8BWG8 Q64727 Q3UKC1 Q63850 Q8C437 O08532 P35282 Q63918 P27546 P47757 Q61301 Q9WV60 Q8K2K6 Q99P72 P70336 Q8VDN2 Q9JJ28 A2CG49 Q9Z1Z2 Q9R0I7 Q91WS0 P08553 Q8BNY6 Q6ZWR6 Q5SNZ0
50789	regulation of biological process	25/50 50.0%	Q8BWG8 Q64727 Q3UKC1 Q63850 Q8C437 O08532 P35282 Q63918 P27546 P47757 Q61301 Q9WV60 Q8K2K6 Q99P72 P70336 Q8VDN2 Q9JJ28 A2CG49 Q9Z1Z2 Q9R0I7 Q91WS0 P08553 Q8BNY6 Q6ZWR6 Q5SNZ0
50794	regulation of cellular process	25/50 50.0%	Q8BWG8 Q64727 Q3UKC1 Q63850 Q8C437 O08532 P35282 Q63918 P27546 P47757 Q61301 Q9WV60 Q8K2K6 Q99P72 P70336 Q8VDN2 Q9JJ28 A2CG49 Q9Z1Z2 Q9R0I7 Q91WS0 P08553 Q8BNY6 Q6ZWR6 Q5SNZ0
16020	membrane	24/50 48.0%	Q61301 Q8BWG8 Q64727 Q9WV92 Q9WV60 Q6PHU5 Q63850 Q99P72 P70336 Q8VDN2 Q9DBG6 Q5QNQ6 Q8C437 O08532 P35282 Q6PGL7 Q9DCP2 Q14CH0 Q91WS0 Q63918 P47757 Q8BNY6 Q6ZWR6 Q5SNZ0
5515	protein binding	24/50 48.0%	Q71RI9 Q61301 Q8BWG8 Q64727 Q9WV92 Q9WV60 Q9QZB7 P97315 Q63850 Q99P72 P70336 Q8VDN2 Q8C437 O08532 Q9JJ28 Q05A62 P35282 Q9CWK8 Q9Z1Z2 P23116 P47757 Q6ZWR6 P80316 Q5SNZ0
44444	cytoplasmic part	22/50 44.0%	Q71RI9 Q8BWG8 Q91YP2 Q64727 Q9WV60 Q8K2K6 Q6PHU5 Q99P72 P70336 Q8VDN2 Q9DBG6 O08532 A2CG49 P35282 Q6PGL7 Q91WS0 P23116 P47757 Q8BNY6 Q6ZWR6 P80316 Q5SNZ0
43227	membrane-bounded organelle	21/50 42.0%	Q71RI9 Q8BWG8 Q91YP2 Q9WV60 P97315 Q8K2K6 Q6PHU5 Q63850 Q99P72 Q8VDN2 Q9DBG6 O08532 Q9JJ28 P35282 Q6PGL7 Q9Z1Z2 Q9R0I7 Q91WS0 P23116 Q8BNY6 Q6ZWR6
43231	intracellular membrane-bounded organelle	21/50 42.0%	Q71RI9 Q8BWG8 Q91YP2 Q9WV60 P97315 Q8K2K6 Q6PHU5 Q63850 Q99P72 Q8VDN2 Q9DBG6 O08532 Q9JJ28 P35282 Q6PGL7 Q9Z1Z2 Q9R0I7 Q91WS0 P23116 Q8BNY6 Q6ZWR6
44425	membrane part	18/50 36.0%	Q61301 Q8BWG8 Q64727 Q9WV92 Q9WV60 Q6PHU5 Q63850 Q99P72 Q8VDN2 Q9DBG6 Q8C437 O08532 Q9DCP2 Q14CH0 Q91WS0 P47757 Q8BNY6 Q6ZWR6
51179	localization	18/50 36.0%	Q61301 Q5H8C4 Q8BWG8 Q9WV60 Q8K2K6 Q6PHU5 Q63850 Q8VDN2 Q5QNQ6 Q8C437 O08532 A2CG49 P35282 Q6PGL7 Q9CWK8 Q9DCP2 P08553 Q6ZWR6
51234	establishment of localization	17/50 34.0%	Q5H8C4 Q8BWG8 Q9WV60 Q8K2K6 Q6PHU5 Q63850 Q8VDN2 Q5QNQ6 Q8C437 O08532 A2CG49 P35282 Q6PGL7 Q9CWK8 Q9DCP2 P08553 Q6ZWR6
6810	transport	16/50 32.0%	Q5H8C4 Q8BWG8 Q9WV60 Q8K2K6 Q6PHU5 Q63850 Q8VDN2 Q5QNQ6 Q8C437 O08532 A2CG49 P35282 Q6PGL7 Q9CWK8 Q9DCP2 P08553
43228	non-membrane-bounded organelle	16/50 32.0%	Q61301 Q64727 Q9WV92 Q9QZB7 P97315 Q63850 P70336 Q9JJ28 A2CG49 P23116 P08553 P27546 P47757 Q6ZWR6 Q80UG5 P80316
43232	intracellular non-membrane-bounded organelle	16/50 32.0%	Q61301 Q64727 Q9WV92 Q9QZB7 P97315 Q63850 P70336 Q9JJ28 A2CG49 P23116 P08553 P27546 P47757 Q6ZWR6 Q80UG5 P80316
5856	cytoskeleton	16/50 32.0%	Q61301 Q64727 Q9WV92 Q9QZB7 P97315 Q63850 P70336 Q9JJ28 A2CG49 P23116 P08553 P27546 P47757 Q6ZWR6 Q80UG5 P80316
42995	cell projection	14/50 28.0%	Q61301 Q8BWG8 Q9WV92 Q9WV60 Q8K2K6 Q6PHU5 Q99P72 Q8C437 A2CG49 P08553 P47757 Q8BNY6 Q6ZWR6 Q5SNZ0
44422	organelle part	14/50 28.0%	Q64727 Q9WV60 Q9QZB7 Q6PHU5 Q63850 Q99P72 P70336 Q9DBG6 Q9Z1Z2 Q91WS0 P08553 P27546 P47757 Q6ZWR6
32991	macromolecular complex	14/50 28.0%	Q9WV60 Q9QZB7 Q63850 Q99P72 Q8VDN2 Q9DBG6 Q8C437 O08532 Q9Z1Z2 P23116 P08553 P27546 P47757 P80316
16043	cellular component organization	14/50 28.0%	Q61301 Q8BWG8 Q64727 Q9WV92 P97315 Q8K2K6 Q6PHU5 Q99P72 P70336 Q9JJ28 A2CG49 P23116 P08553 P47757
32502	developmental process	13/50 26.0%	Q61301 Q5H8C4 Q9WV60 Q8K2K6 Q6PHU5 Q63850 Q99P72 Q9JJ28 A2CG49 P08553 Q8BNY6 Q6ZWR6 Q5SNZ0
44446	intracellular organelle part	13/50 26.0%	Q9WV60 Q9QZB7 Q6PHU5 Q63850 Q99P72 P70336 Q9DBG6 Q9Z1Z2 Q91WS0 P08553 P27546 P47757 Q6ZWR6
43234	protein complex	13/50 26.0%	Q9WV60 Q9QZB7 Q63850 Q99P72 Q8VDN2 Q9DBG6 Q8C437 O08532 P23116 P08553 P27546 P47757 P80316
5886	plasma membrane	12/50 24.0%	O08532 Q61301 Q8BWG8 Q9DCP2 Q64727 Q6PHU5 P47757 Q99P72 P70336 Q8VDN2 Q8BNY6 Q5SNZ0
7275	multicellular organismal development	12/50 24.0%	Q61301 Q9JJ28 Q5H8C4 A2CG49 Q9WV60 Q8K2K6 P08553 Q6PHU5 Q99P72 Q8BNY6 Q6ZWR6 Q5SNZ0
51128	regulation of cellular component organization	11/50 22.0%	Q61301 A2CG49 Q9WV60 P08553 P27546 P47757 Q99P72 P70336 Q8BNY6 Q6ZWR6 Q5SNZ0
19222	regulation of metabolic process	11/50 22.0%	Q9JJ28 Q8BWG8 Q9Z1Z2 Q9R0I7 Q9WV60 Q91WS0 Q8K2K6 Q63918 Q63850 Q8VDN2 Q5SNZ0
31323	regulation of cellular metabolic process	11/50 22.0%	Q9JJ28 Q8BWG8 Q9Z1Z2 Q9R0I7 Q9WV60 Q91WS0 Q8K2K6 Q63918 Q63850 Q8VDN2 Q5SNZ0
48856	anatomical structure development	11/50 22.0%	Q61301 Q5H8C4 A2CG49 Q9WV60 Q8K2K6 P08553 Q6PHU5 Q99P72 Q8BNY6 Q6ZWR6 Q5SNZ0
48519	negative regulation of biological process	11/50 22.0%	Q61301 Q8BWG8 Q9Z1Z2 Q9WV60 Q3UKC1 Q63850 P27546 P47757 Q99P72 Q8VDN2 Q8BNY6
43005	neuron projection	10/50 20.0%	Q8C437 Q61301 A2CG49 Q9WV92 Q9WV60 P08553 Q6PHU5 Q99P72 Q8BNY6 Q6ZWR6
48731	system development	10/50 20.0%	Q61301 Q5H8C4 A2CG49 Q9WV60 P08553 Q6PHU5 Q99P72 Q8BNY6 Q6ZWR6 Q5SNZ0
48869	cellular developmental process	10/50 20.0%	Q61301 A2CG49 Q9WV60 Q8K2K6 P08553 Q6PHU5 Q99P72 Q8BNY6 Q6ZWR6 Q5SNZ0
30154	cell differentiation	10/50 20.0%	Q61301 A2CG49 Q9WV60 Q8K2K6 P08553 Q6PHU5 Q99P72 Q8BNY6 Q6ZWR6 Q5SNZ0
7399	nervous system development	9/50 18.0%	Q61301 Q5H8C4 A2CG49 Q9WV60 P08553 Q99P72 Q8BNY6 Q6ZWR6 Q5SNZ0
10646	regulation of cell communication	9/50 18.0%	Q8C437 Q8BWG8 A2CG49 Q9Z1Z2 Q9WV60 Q8K2K6 Q63850 Q99P72 Q8BNY6
48523	negative regulation of cellular process	9/50 18.0%	Q8BWG8 Q9Z1Z2 Q9WV60 Q3UKC1 Q63850 P27546 P47757 Q99P72 Q8VDN2
33036	macromolecule localization	8/50 16.0%	Q8C437 Q5H8C4 Q8BWG8 P35282 Q9CWK8 Q9WV60 Q63850 Q5QNQ6
65009	regulation of molecular function	8/50 16.0%	Q8C437 O08532 Q8BWG8 Q9WV60 Q8K2K6 Q63850 Q8BNY6 Q5SNZ0
22008	neurogenesis	8/50 16.0%	Q61301 A2CG49 Q9WV60 P08553 Q99P72 Q8BNY6 Q6ZWR6 Q5SNZ0
48699	generation of neurons	8/50 16.0%	Q61301 A2CG49 Q9WV60 P08553 Q99P72 Q8BNY6 Q6ZWR6 Q5SNZ0
48518	positive regulation of biological process	8/50 16.0%	Q8BWG8 Q9WV60 Q63918 Q99P72 P70336 Q8VDN2 Q8BNY6 Q6ZWR6
17076	purine nucleotide binding	8/50 16.0%	A2CG49 P35282 Q9WV60 P32233 P70336 Q8VDN2 Q80UG5 P80316
32553	ribonucleotide binding	8/50 16.0%	A2CG49 P35282 Q9WV60 P32233 P70336 Q8VDN2 Q80UG5 P80316
32555	purine ribonucleotide binding	8/50 16.0%	A2CG49 P35282 Q9WV60 P32233 P70336 Q8VDN2 Q80UG5 P80316
51239	regulation of multicellular organismal process	8/50 16.0%	A2CG49 Q9WV60 P08553 Q99P72 Q8VDN2 Q8BNY6 Q6ZWR6 Q5SNZ0
6996	organelle organization	8/50 16.0%	Q9JJ28 Q9WV92 P97315 Q8K2K6 P08553 Q6PHU5 P47757 P70336
23034	intracellular signaling pathway	7/50 14.0%	Q8BWG8 A2CG49 P35282 Q9WV60 P70336 Q8BNY6 Q5SNZ0
50793	regulation of developmental process	7/50 14.0%	A2CG49 Q9WV60 P08553 Q99P72 Q8BNY6 Q6ZWR6 Q5SNZ0
8104	protein localization	7/50 14.0%	Q8C437 Q5H8C4 Q8BWG8 P35282 Q9CWK8 Q9WV60 Q63850
35466	regulation of signaling pathway	7/50 14.0%	Q8C437 Q8BWG8 A2CG49 Q9Z1Z2 Q9WV60 Q8K2K6 Q63850
45595	regulation of cell differentiation	7/50 14.0%	A2CG49 Q9WV60 P08553 Q99P72 Q8BNY6 Q6ZWR6 Q5SNZ0
8092	cytoskeletal protein binding	7/50 14.0%	Q9JJ28 Q64727 Q9WV92 Q9WV60 P47757 Q6ZWR6 Q5SNZ0
7010	cytoskeleton organization	7/50 14.0%	Q9JJ28 Q9WV92 P97315 Q8K2K6 P08553 P47757 P70336
60284	regulation of cell development	7/50 14.0%	A2CG49 Q9WV60 P08553 Q99P72 Q8BNY6 Q6ZWR6 Q5SNZ0
51960	regulation of nervous system development	7/50 14.0%	A2CG49 Q9WV60 P08553 Q99P72 Q8BNY6 Q6ZWR6 Q5SNZ0
50767	regulation of neurogenesis	7/50 14.0%	A2CG49 Q9WV60 P08553 Q99P72 Q8BNY6 Q6ZWR6 Q5SNZ0
45664	regulation of neuron differentiation	7/50 14.0%	A2CG49 Q9WV60 P08553 Q99P72 Q8BNY6 Q6ZWR6 Q5SNZ0
31344	regulation of cell projection organization	7/50 14.0%	A2CG49 Q9WV60 P08553 Q99P72 Q8BNY6 Q6ZWR6 Q5SNZ0
44459	plasma membrane part	7/50 14.0%	O08532 Q61301 Q9DCP2 Q64727 P47757 Q8VDN2 Q8BNY6
65008	regulation of biological quality	7/50 14.0%	Q8C437 Q61301 Q9WV60 P08553 P47757 Q99P72 Q8VDN2
10975	regulation of neuron projection development	7/50 14.0%	A2CG49 Q9WV60 P08553 Q99P72 Q8BNY6 Q6ZWR6 Q5SNZ0
50790	regulation of catalytic activity	6/50 12.0%	Q8C437 Q8BWG8 Q9WV60 Q8K2K6 Q63850 Q5SNZ0
32879	regulation of localization	6/50 12.0%	O08532 Q64727 Q9WV60 Q99P72 Q8BNY6 Q6ZWR6
44430	cytoskeletal part	6/50 12.0%	Q9QZB7 P08553 P27546 P47757 P70336 Q6ZWR6
45184	establishment of protein localization	6/50 12.0%	Q5H8C4 Q8BWG8 P35282 Q9CWK8 Q9WV60 Q63850
15031	protein transport	6/50 12.0%	Q5H8C4 Q8BWG8 P35282 Q9CWK8 Q9WV60 Q63850
23051	regulation of signaling process	6/50 12.0%	Q8C437 Q8BWG8 A2CG49 Q9WV60 Q8K2K6 Q63850
9966	regulation of signal transduction	6/50 12.0%	Q8C437 Q8BWG8 A2CG49 Q9WV60 Q8K2K6 Q63850
267	cell fraction	6/50 12.0%	Q8C437 Q8BWG8 Q9WV60 Q6PHU5 Q8VDN2 Q9DBG6
5783	endoplasmic reticulum	5/50 10.0%	O08532 P35282 Q6PHU5 Q99P72 Q9DBG6
22892	substrate-specific transporter activity	5/50 10.0%	Q8C437 O08532 Q9CWK8 Q9DCP2 Q8VDN2
5626	insoluble fraction	5/50 10.0%	Q8C437 Q8BWG8 Q6PHU5 Q8VDN2 Q9DBG6
5624	membrane fraction	5/50 10.0%	Q8C437 Q8BWG8 Q6PHU5 Q8VDN2 Q9DBG6
55085	transmembrane transport	5/50 10.0%	Q8C437 O08532 Q9DCP2 Q63850 Q8VDN2
51641	cellular localization	5/50 10.0%	Q8C437 Q9CWK8 Q9WV60 P08553 Q6ZWR6
44085	cellular component biogenesis	5/50 10.0%	Q64727 Q8K2K6 P23116 P08553 P47757
35556	intracellular signal transduction	5/50 10.0%	Q8BWG8 P35282 P70336 Q8BNY6 Q5SNZ0
51649	establishment of localization in cell	5/50 10.0%	Q8C437 Q9CWK8 Q9WV60 P08553 Q6ZWR6
31982	vesicle	5/50 10.0%	Q8BWG8 P35282 Q8K2K6 Q6PHU5 Q5SNZ0
22607	cellular component assembly	5/50 10.0%	Q64727 Q8K2K6 P23116 P08553 P47757
31410	cytoplasmic vesicle	5/50 10.0%	Q8BWG8 P35282 Q8K2K6 Q6PHU5 Q5SNZ0
51049	regulation of transport	5/50 10.0%	O08532 Q9WV60 Q99P72 Q8BNY6 Q6ZWR6
12505	endomembrane system	5/50 10.0%	Q8BWG8 Q63850 Q99P72 Q6ZWR6 Q9DBG6
5198	structural molecule activity	5/50 10.0%	Q61301 Q64727 Q9WV92 P08553 Q63850
44297	cell body	5/50 10.0%	A2CG49 Q9WV60 Q8K2K6 Q6PHU5 Q99P72
43025	neuronal cell body	5/50 10.0%	A2CG49 Q9WV60 Q8K2K6 Q6PHU5 Q99P72
3779	actin binding	5/50 10.0%	Q9JJ28 Q64727 Q9WV92 P47757 Q6ZWR6
30425	dendrite	5/50 10.0%	Q8C437 Q9WV60 Q6PHU5 Q8BNY6 Q6ZWR6
15629	actin cytoskeleton	5/50 10.0%	Q61301 Q64727 Q9QZB7 P97315 P47757
30029	actin filament-based process	5/50 10.0%	Q9JJ28 Q9WV92 P97315 P47757 P70336
30036	actin cytoskeleton organization	5/50 10.0%	Q9JJ28 Q9WV92 P97315 P47757 P70336
10769	regulation of cell morphogenesis involved in differentiation	4/50 8.0%	Q9WV60 P08553 Q99P72 Q6ZWR6
6812	cation transport	4/50 8.0%	Q8C437 O08532 Q9DCP2 Q8VDN2
31975	envelope	4/50 8.0%	Q91WS0 Q63850 Q99P72 Q6ZWR6
31967	organelle envelope	4/50 8.0%	Q91WS0 Q63850 Q99P72 Q6ZWR6
30054	cell junction	4/50 8.0%	Q61301 Q64727 P47757 Q8BNY6
16192	vesicle-mediated transport	4/50 8.0%	Q8C437 Q8BWG8 A2CG49 Q6PHU5
19220	regulation of phosphate metabolic process	4/50 8.0%	Q8BWG8 Q9WV60 Q63850 Q5SNZ0
51174	regulation of phosphorus metabolic process	4/50 8.0%	Q8BWG8 Q9WV60 Q63850 Q5SNZ0
19899	enzyme binding	4/50 8.0%	Q8C437 Q64727 Q9WV60 Q5SNZ0
30030	cell projection organization	4/50 8.0%	Q61301 A2CG49 Q64727 P47757
42325	regulation of phosphorylation	4/50 8.0%	Q8BWG8 Q9WV60 Q63850 Q5SNZ0
32989	cellular component morphogenesis	4/50 8.0%	Q61301 A2CG49 Q8K2K6 Q99P72
15630	microtubule cytoskeleton	4/50 8.0%	Q9QZB7 P27546 P70336 Q6ZWR6
44057	regulation of system process	4/50 8.0%	Q9WV60 Q99P72 Q8VDN2 Q8BNY6
44463	cell projection part	4/50 8.0%	Q9WV92 Q9WV60 P08553 Q6ZWR6
5768	endosome	4/50 8.0%	P35282 Q6PGL7 Q6PHU5 Q8VDN2
22603	regulation of anatomical structure morphogenesis	4/50 8.0%	Q9WV60 P08553 Q99P72 Q6ZWR6	s plsda
51338	regulation of transferase activity	4/50 8.0%	Q8BWG8 Q9WV60 Q63850 Q5SNZ0
30424	axon	4/50 8.0%	Q61301 Q9WV92 P08553 Q8BNY6
51050	positive regulation of transport	4/50 8.0%	Q9WV60 Q99P72 Q8BNY6 Q6ZWR6
43549	regulation of kinase activity	4/50 8.0%	Q8BWG8 Q9WV60 Q63850 Q5SNZ0
45859	regulation of protein kinase activity	4/50 8.0%	Q8BWG8 Q9WV60 Q63850 Q5SNZ0
22604	regulation of cell morphogenesis	4/50 8.0%	Q9WV60 P08553 Q99P72 Q6ZWR6
51129	negative regulation of cellular component organization	4/50 8.0%	Q9WV60 P27546 P47757 Q99P72
43405	regulation of MAP kinase activity	3/50 6.0%	Q8BWG8 Q9WV60 Q63850
30016	myofibril	3/50 6.0%	Q64727 P47757 Q6ZWR6
44449	contractile fiber part	3/50 6.0%	Q64727 P47757 Q6ZWR6
50773	regulation of dendrite development	3/50 6.0%	A2CG49 Q9WV60 Q6ZWR6
51674	localization of cell	3/50 6.0%	Q61301 Q9WV60 Q63850
48870	cell motility	3/50 6.0%	Q61301 Q9WV60 Q63850
42598	vesicular fraction	3/50 6.0%	Q6PHU5 Q8VDN2 Q9DBG6
5792	microsome	3/50 6.0%	Q6PHU5 Q8VDN2 Q9DBG6
60341	regulation of cellular localization	3/50 6.0%	Q9WV60 Q99P72 Q8BNY6
16477	cell migration	3/50 6.0%	Q61301 Q9WV60 Q63850
904	cell morphogenesis involved in differentiation	3/50 6.0%	Q61301 A2CG49 Q99P72
10648	negative regulation of cell communication	3/50 6.0%	Q8BWG8 Q9Z1Z2 Q63850
90066	regulation of anatomical structure size	3/50 6.0%	P08553 P47757 Q99P72
5083	small GTPase regulator activity	3/50 6.0%	Q8C437 A2CG49 Q8K2K6
71212	subsynaptic reticulum	3/50 6.0%	O08532 Q99P72 Q9DBG6
51056	regulation of small GTPase mediated signal transduction	3/50 6.0%	A2CG49 Q8K2K6 Q63850
44092	negative regulation of molecular function	3/50 6.0%	Q9WV60 Q63850 Q8BNY6
32535	regulation of cellular component size	3/50 6.0%	P08553 P47757 Q99P72
5911	cell-cell junction	3/50 6.0%	Q61301 Q64727 P47757
31644	regulation of neurological system process	3/50 6.0%	Q9WV60 Q99P72 Q8BNY6
46578	regulation of Ras protein signal transduction	3/50 6.0%	A2CG49 Q8K2K6 Q63850
33043	regulation of organelle organization	3/50 6.0%	P27546 P47757 P70336
16323	basolateral plasma membrane	3/50 6.0%	Q61301 Q64727 Q8VDN2
5635	nuclear envelope	3/50 6.0%	Q63850 Q99P72 Q6ZWR6
51493	regulation of cytoskeleton organization	3/50 6.0%	P27546 P47757 P70336
43292	contractile fiber	3/50 6.0%	Q64727 P47757 Q6ZWR6
34762	regulation of transmembrane transport	2/50 4.0%	O08532 Q8BNY6
34765	regulation of ion transmembrane transport	2/50 4.0%	O08532 Q8BNY6
70161	anchoring junction	2/50 4.0%	Q61301 Q64727
51020	GTPase binding	2/50 4.0%	Q8C437 Q64727
34703	cation channel complex	2/50 4.0%	Q8C437 O08532
23057	negative regulation of signaling process	2/50 4.0%	Q8BWG8 Q63850
9968	negative regulation of signal transduction	2/50 4.0%	Q8BWG8 Q63850
5912	adherens junction	2/50 4.0%	Q61301 Q64727
7018	microtubule-based movement	2/50 4.0%	Q9QZB7 P08553
51924	regulation of calcium ion transport	2/50 4.0%	O08532 Q8BNY6
31267	small GTPase binding	2/50 4.0%	Q8C437 Q64727
30017	sarcomere	2/50 4.0%	P47757 Q6ZWR6
42383	sarcolemma	2/50 4.0%	O08532 Q8VDN2
17016	Ras GTPase binding	2/50 4.0%	Q8C437 Q64727
30031	cell projection assembly	2/50 4.0%	Q64727 P47757
43197	dendritic spine	2/50 4.0%	Q9WV60 Q6ZWR6
44309	neuron spine	2/50 4.0%	Q9WV60 Q6ZWR6
50770	regulation of axonogenesis	2/50 4.0%	P08553 Q99P72
51348	negative regulation of transferase activity	2/50 4.0%	Q9WV60 Q63850
10639	negative regulation of organelle organization	2/50 4.0%	P27546 P47757
10721	negative regulation of cell development	2/50 4.0%	Q9WV60 Q99P72
33673	negative regulation of kinase activity	2/50 4.0%	Q9WV60 Q63850
50768	negative regulation of neurogenesis	2/50 4.0%	Q9WV60 Q99P72
6469	negative regulation of protein kinase activity	2/50 4.0%	Q9WV60 Q63850
30027	lamellipodium	2/50 4.0%	Q61301 P47757
5819	spindle	2/50 4.0%	P70336 Q6ZWR6
51494	negative regulation of cytoskeleton organization	2/50 4.0%	P27546 P47757
32409	regulation of transporter activity	2/50 4.0%	O08532 Q8BNY6
43244	regulation of protein complex disassembly	2/50 4.0%	P27546 P47757
22898	regulation of transmembrane transporter activity	2/50 4.0%	O08532 Q8BNY6
32412	regulation of ion transmembrane transporter activity	2/50 4.0%	O08532 Q8BNY6
32886	regulation of microtubule-based process	2/50 4.0%	P27546 P70336
31345	negative regulation of cell projection organization	2/50 4.0%	Q9WV60 Q99P72
5913	cell-cell adherens junction	2/50 4.0%	Q61301 Q64727
51925	regulation of calcium ion transport via voltage-gated calcium channel activity	2/50 4.0%	O08532 Q8BNY6
43242	negative regulation of protein complex disassembly	2/50 4.0%	P27546 P47757
70507	regulation of microtubule cytoskeleton organization	2/50 4.0%	P27546 P70336
43407	negative regulation of MAP kinase activity	2/50 4.0%	Q9WV60 Q63850
48814	regulation of dendrite morphogenesis	2/50 4.0%	Q9WV60 Q6ZWR6
45103	intermediate filament-based process	2/50 4.0%	Q8K2K6 P08553
45104	intermediate filament cytoskeleton organization	2/50 4.0%	Q8K2K6 P08553
14704	intercalated disc	2/50 4.0%	Q64727 P47757
44291	cell-cell contact zone	2/50 4.0%	Q64727 P47757
30032	lamellipodium assembly	2/50 4.0%	Q64727 P47757
45109	intermediate filament organization	2/50 4.0%	Q8K2K6 P08553
10959	regulation of metal ion transport	2/50 4.0%	O08532 Q8BNY6
6916	anti-apoptosis	2/50 4.0%	Q9WV60 Q3UKC1

## Sheet: C3
Protein IDs	protein names	gene name
O08691	Arginase-2, mitochondrial	Arg2
O88444	Adenylate cyclase type 1	Adcy1
O88703	Potassium/sodium hyperpolarization-activated cyclic nucleotide-gated channel 2	Hcn2
P35278	Ras-related protein Rab-5C	Rab5c
P39054	Dynamin-2	Dnm2
P60755	MAM domain-containing glycosylphosphatidylinositol anchor protein 2	Mdga2
P62880	Guanine nucleotide-binding protein G(I)/G(S)/G(T) subunit beta-2	Gnb2
P62881	Guanine nucleotide-binding protein subunit beta-5	Gnb5
P97390	Vacuolar protein sorting-associated protein 45	Vps45
Q3TFQ1	SPRY domain-containing protein 7	Spryd7
Q3UZV7	Endosome/lysosome-associated apoptosis and autophagy regulator family member 2	Elapor2
Q60737	Casein kinase II subunit alpha	Csnk2a1
Q61937	Nucleophosmin	Npm1
Q7TNR6	Immunoglobulin superfamily member 21	Igsf21
Q80X81	Acetyl-Coenzyme A acetyltransferase 3	Acat3
Q80Z24	Neuronal growth regulator 1	Negr1
Q8BL86	Acyl-coenzyme A thioesterase MBLAC2	Mblac2
Q8CAY6	Acetyl-CoA acetyltransferase, cytosolic	Acat2
Q8K207	Uncharacterized protein C1orf21 homolog
Q922B1	ADP-ribose glycohydrolase MACROD1	Macrod1
Q922H4	Mannose-1-phosphate guanyltransferase alpha	Gmppa
Q99M71	Mammalian ependymin-related protein 1	Epdr1
Q9CPS8	Small membrane A-kinase anchor protein
Q9CZN8	Glutamyl-tRNA(Gln) amidotransferase subunit A, mitochondrial	Qrsl1
Q9CZX9	ER membrane protein complex subunit 4	Emc4
Q9D1H7	Golgi to ER traffic protein 4 homolog	Get4
Q9DCB4	cAMP-regulated phosphoprotein 21	Arpp21
Q9DCI9	39S ribosomal protein L32, mitochondrial	Mrpl32
Q9ERL9	Guanylate cyclase soluble subunit alpha-1	Gucy1a1
Q9QXV0	ProSAAS	Pcsk1n
Q9WU40	Inner nuclear membrane protein Man1	Lemd3
Q9WUR9	Adenylate kinase 4, mitochondrial	Ak4

## Sheet: C3-terms
GO ID	GO description	cluster frequency	genes
44444	cytoplasmic part	9/26 34.6%	Q99M71 Q922B1 Q9QXV0 Q61937 P35278 O08691 P97390 Q9DCI9 Q9ERL9
166	nucleotide binding	7/26 26.9%	Q9CZN8 O88703 Q9WU40 Q922H4 P35278 O88444 Q9ERL9
5886	plasma membrane	7/26 26.9%	P62880 P62881 O88703 Q80Z24 P35278 O88444 P60755
32555	purine ribonucleotide binding	6/26 23.0%	Q9CZN8 O88703 Q922H4 P35278 O88444 Q9ERL9
32553	ribonucleotide binding	6/26 23.0%	Q9CZN8 O88703 Q922H4 P35278 O88444 Q9ERL9
17076	purine nucleotide binding	6/26 23.0%	Q9CZN8 O88703 Q922H4 P35278 O88444 Q9ERL9
44281	small molecule metabolic process	5/26 19.2%	P62880 P35278 O08691 O88444 Q9ERL9
6163	purine nucleotide metabolic process	4/26 15.3%	P62880 P35278 O88444 Q9ERL9
6753	nucleoside phosphate metabolic process	4/26 15.3%	P62880 P35278 O88444 Q9ERL9
9117	nucleotide metabolic process	4/26 15.3%	P62880 P35278 O88444 Q9ERL9
55086	nucleobase, nucleoside and nucleotide metabolic process	4/26 15.3%	P62880 P35278 O88444 Q9ERL9
46483	heterocycle metabolic process	4/26 15.3%	P62880 P35278 O88444 Q9ERL9
50790	regulation of catalytic activity	4/26 15.3%	Q9QXV0 Q61937 O08691 O88444
65009	regulation of molecular function	4/26 15.3%	Q9QXV0 Q61937 O08691 O88444
44271	cellular nitrogen compound biosynthetic process	3/26 11.5%	O08691 O88444 Q9ERL9
5525	GTP binding	3/26 11.5%	Q922H4 P35278 Q9ERL9
44057	regulation of system process	3/26 11.5%	O88703 O08691 Q9ERL9
19001	guanyl nucleotide binding	3/26 11.5%	Q922H4 P35278 Q9ERL9
32561	guanyl ribonucleotide binding	3/26 11.5%	Q922H4 P35278 Q9ERL9
45932	negative regulation of muscle contraction	2/26 7.6%	O08691 Q9ERL9
16849	phosphorus-oxygen lyase activity	2/26 7.6%	O88444 Q9ERL9
9975	cyclase activity	2/26 7.6%	O88444 Q9ERL9
9190	cyclic nucleotide biosynthetic process	2/26 7.6%	O88444 Q9ERL9
15934	large ribosomal subunit	2/26 7.6%	Q61937 Q9DCI9
9187	cyclic nucleotide metabolic process	2/26 7.6%	O88444 Q9ERL9
9124	nucleoside monophosphate biosynthetic process	2/26 7.6%	O88444 Q9ERL9
6184	GTP catabolic process	2/26 7.6%	P62880 P35278
6937	regulation of muscle contraction	2/26 7.6%	O08691 Q9ERL9
33279	ribosomal subunit	2/26 7.6%	Q61937 Q9DCI9
9123	nucleoside monophosphate metabolic process	2/26 7.6%	O88444 Q9ERL9
46039	GTP metabolic process	2/26 7.6%	P62880 P35278
90257	regulation of muscle system process	2/26 7.6%	O08691 Q9ERL9
3012	muscle system process	2/26 7.6%	O08691 Q9ERL9
30802	regulation of cyclic nucleotide biosynthetic process	2/26 7.6%	O88444 Q9ERL9
30808	regulation of nucleotide biosynthetic process	2/26 7.6%	O88444 Q9ERL9
30799	regulation of cyclic nucleotide metabolic process	2/26 7.6%	O88444 Q9ERL9
31225	anchored to membrane	2/26 7.6%	Q80Z24 P60755
6164	purine nucleotide biosynthetic process	2/26 7.6%	O88444 Q9ERL9
3924	GTPase activity	2/26 7.6%	P62880 P35278
9207	purine ribonucleoside triphosphate catabolic process	2/26 7.6%	P62880 P35278
9203	ribonucleoside triphosphate catabolic process	2/26 7.6%	P62880 P35278
9146	purine nucleoside triphosphate catabolic process	2/26 7.6%	P62880 P35278
9154	purine ribonucleotide catabolic process	2/26 7.6%	P62880 P35278
51241	negative regulation of multicellular organismal process	2/26 7.6%	O08691 Q9ERL9
9261	ribonucleotide catabolic process	2/26 7.6%	P62880 P35278
9143	nucleoside triphosphate catabolic process	2/26 7.6%	P62880 P35278
16829	lyase activity	2/26 7.6%	O88444 Q9ERL9
43086	negative regulation of catalytic activity	2/26 7.6%	Q9QXV0 O08691
6195	purine nucleotide catabolic process	2/26 7.6%	P62880 P35278
9165	nucleotide biosynthetic process	2/26 7.6%	O88444 Q9ERL9
34404	nucleobase, nucleoside and nucleotide biosynthetic process	2/26 7.6%	O88444 Q9ERL9
34654	nucleobase, nucleoside, nucleotide and nucleic acid biosynthetic process	2/26 7.6%	O88444 Q9ERL9
9166	nucleotide catabolic process	2/26 7.6%	P62880 P35278

## Sheet: C4
Protein IDs	protein names	gene name
Q5XJY5	Coatomer subunit delta	Arcn1
Q6PHZ2	Calcium/calmodulin-dependent protein kinase type II subunit delta	Camk2d
Q9Z0E0	Neurochondrin	Ncdn
Q9WTR5	Cadherin-13	Cdh13
P59759	Myocardin-related transcription factor B	Mrtfb
Q8K4J6	Myocardin-related transcription factor A	Mrtfa
Q8VIM5	Myocardin	Myocd
Q9QZ06	Toll-interacting protein	Tollip
Q6PF93	Phosphatidylinositol 3-kinase catalytic subunit type 3	Pik3c3
Q91WJ8	Far upstream element-binding protein 1	Fubp1
Q9QYC0	Alpha-adducin	Add1
Q03137	Ephrin type-A receptor 4	Epha4
P29319	Ephrin type-A receptor 3	Epha3
Q4ACU6	SH3 and multiple ankyrin repeat domains protein 3	Shank3
Q9DAR7	m7GpppX diphosphatase	Dcps
Q9CZW4	Long-chain-fatty-acid--CoA ligase 3	Acsl3
P70175	Disks large homolog 3	Dlg3
Q9D8N0	Elongation factor 1-gamma	Eef1g
Q8BMS4	Ubiquinone biosynthesis O-methyltransferase, mitochondrial	Coq3
Q8BX10	Serine/threonine-protein phosphatase PGAM5, mitochondrial	Pgam5

[truncated: 2 more sheets: C4-terms, C5]
